# Evidence of a Critical Role for Cellodextrin Transporter 2 (CDT-2) in Both Cellulose and Hemicellulose Degradation and Utilization in *Neurospora crassa*

Pengli Cai<sup>1</sup>, Ruimeng Gu<sup>1</sup>, Bang Wang<sup>1</sup>, Jingen Li<sup>1</sup>, Li Wan<sup>1</sup>, Chaoguang Tian<sup>1\*</sup>, Yanhe Ma<sup>1,2</sup>

**1** Key Laboratory of Systems Microbial Biotechnology, Tianjin Institute of Industrial Biotechnology, Chinese Academy of Sciences, Tianjin, China, **2** Institute of Microbiology, Chinese Academy of Sciences, Beijing, China

## Abstract

CDT-1 and CDT-2 are two cellodextrin transporters discovered in the filamentous fungus *Neurospora crassa*. Previous studies focused on characterizing the role of these transporters in only a few conditions, including cellulose degradation, and the function of these two transporters is not yet completely understood. In this study, we show that deletion of *cdt-2*, but not *cdt-1*, results in growth defects not only on Avicel but also on xylan. *cdt-2* can be highly induced by xylan, and this mutant has a xylohexose consumption defect. Transcriptomic analysis of the *cdt-2* deletion strain on Avicel and xylan showed that major cellulase and hemicellulase genes were significantly down-regulated in the *cdt-2* deletion strain and artificial over expression of *cdt-2* in *N. crassa* increased cellulase and hemicellulase production. Together, these data clearly show that CDT-2 plays a critical role in hemicellulose sensing and utilization. This is the first time a sugar transporter has been assigned a function in the hemicellulose degradation pathway. Furthermore, we found that the transcription factor XLR-1 is the major regulator of *cdt-2*, while *cdt-1* is primarily regulated by CLR-1. These results deepen our understanding of the functions of both cellodextrin transporters, particularly for CDT-2. Our study also provides novel insight into the mechanisms for hemicellulose sensing and utilization in *N. crassa*, and may be applicable to other cellulolytic filamentous fungi.

**Citation:** Cai P, Gu R, Wang B, Li J, Wan L, et al. (2014) Evidence of a Critical Role for Cellodextrin Transporter 2 (CDT-2) in Both Cellulose and Hemicellulose Degradation and Utilization in *Neurospora crassa*. PLoS ONE 9(2): e89330. doi:10.1371/journal.pone.0089330

**Editor:** Michael Freitag, Oregon State University, United States of America

**Received:** October 16, 2013; **Accepted:** January 18, 2014; **Published:** February 20, 2014

**Copyright:** © 2014 Cai et al. This is an open-access article distributed under the terms of the Creative Commons Attribution License, which permits unrestricted use, distribution, and reproduction in any medium, provided the original author and source are credited.

**Funding:** This study was supported by 973 program of China (2013CB733600 and 2011CB707400), the Natural Science Foundation of China (Grant No. 31171207) and a sub-award from Energy Biosciences Institute (EBI) to CT. The funders had no role in study design, data collection and analysis, decision to publish, or preparation of the manuscript.

**Competing Interests:** One patent application has been submitted to SIPO of China: A novel application of CDT-2 protein, 201310165380.X. This does not alter the authors' adherence to all the PLOS ONE policies on sharing data and materials.

\* E-mail: tian\_cg@tib.cas.cn

## Introduction

Lignocellulose degradation is a critical step for biofuels and bio-based chemical production in biorefineries [1,2]. The mechanism by which cellulolytic organisms, such as fungi, sense and metabolize solid cellulose and hemicellulose is still far from understood. Typically, lignocellulases are expressed at a basal level on the periphery of conidia, and these enzymes degrade biomass into various carbohydrates [3,4]. These carbohydrates include: cellodextrins (glucose polymers, such as cellobiose, cellotriose and cellotetraose) derived from cellulose, and xylohexose (xylose polymers, such as xylobiose, xylotriose and xylotetraose) derived from hemicellulose [5–7]. Oligosaccharides such as cellodextrins and xylohexose are thought to function as inducer molecules. Cellodextrin and its modifiers have been implicated as cellulase inducers in *Trichoderma reesei* [3,8] and *Neurospora crassa* [9]. Xylobiose was suggested as a xylanase inducer in the thermophilic fungus *Thermoascus aurantiacus* [10]. It is possible that organisms sense cellulose or hemicellulose through recognition of these oligosaccharides by a transporter in the membrane, and in fact the genome of *N. crassa* encodes for two cellodextrin transporters, *cdt-1* and *cdt-2* [11]. In addition, two major facilitator superfamily (MFS) sugar transporters, Stp1 and Crt1, were implicated in cellulose sensing and cellulase induction in *T. reesei* [12]. Stp1

repressed the induction of cellulases and hemicellulases on Avicel, while the Crt1 is required for cellulase induction by cellulose, lactose, and possibly sorbose. However, Crt1 was not required for hemicellulase expression on xylan [12,13]. Similarly, two cellodextrin transporters, CdtC and CdtD, were identified in *Penicillium oxalicum*, and these transporters affect cellulase induction and cellulose utilization [14]. Sugar transporters involved in sensing hemicellulose have not been previously reported.

CDT-1 and CDT-2 were the first cellodextrin transporters identified in filamentous fungi, and it was previously shown that deletion of *cdt-2* caused significant growth defects on cellulose, while the *cdt-1* deletion strain showed similar growth to that of wild type [11]. An engineered *Saccharomyces cerevisiae* strain expressing *cdt-2* exhibited lower rates of cellobiose fermentation compared with engineered strains carrying *cdt-1* [15]. These results suggest that although they have redundant roles in cellobiose transport, there are differences between the functions of the *cdt-1* and *cdt-2* [11]. The function of *cdt-1* and *cdt-2* has only been evaluated with respect to cellulose degradation (Avicel, cellobiose) [11]. Additional conditions, such as growth on hemicellulose (the second major part of the plant biomass), need to be investigated to fully characterize the role of these two cellodextrin transporters.

Very little is known about the regulation of *cdt-1* and *cdt-2*, although cellulose and hemicellulose degradation regulators can

affect their expression. In previous research, *cdt-1* and *cdt-2* expressions were modulated in mutants of *clr-1* or *clr-2*, two major cellulose degradation regulators in *N. crassa* [16]. This data suggested that both cellodextrin transporters could be regulated by CLR-1 and CLR-2, either direct or indirectly. XlnR and its orthologs are conserved lignocellulase regulators, particularly for hemicellulase expression in filamentous fungi, including XlnR in *Aspergillus niger* [17], XYR-1 in *T. reesei* [18] and XLR-1 in *N. crassa* [19]. Transcriptional profiling of the *xlr-1* mutant in *N. crassa* identified *cdt-2* as one of 245 genes in the putative XLR-1 regulon [19].

In the present study, we comprehensively investigated the function of *cdt-1* and *cdt-2* by assessing the phenotypes of single and double knock-outs of these genes under a variety of carbon conditions, including growth on hemicellulose. We also evaluated the expression and localization patterns of these transporters under cellulose and hemicellulose conditions, and conducted a transcriptomic analysis of the *cdt-2* deletion mutant in both cellulose and hemicellulose conditions. Higher cellulase and hemicellulase production were observed in strains artificially over-expression *cdt-2*. Finally, we performed a comparative analysis of the transcriptional regulation of *cdt-1* and *cdt-2*. This is the first analysis of cellodextrin transporter function with regards to hemicellulose degradation and utilization. Our results indicated that CDT-2 plays critical roles in both sensing and utilization of cellulose and hemicellulose, and provide novel insights that can be applied to cellulase and hemicellulase production for industrial fungi.

## Materials and Methods

### Strains and Culture Conditions

All strains used in this study are listed in Table 1. *N. crassa* strains were obtained from the Fungal Genetics Stock Center (FGSC) [20], including wild type (WT, FGSC 2489), two cellodextrin transporter deletion strains (FGSC 16575,  $\Delta cdt-1$ ; FGSC 17868,  $\Delta cdt-2$ ) and a *his-3* mutant strain (FGSC 6103, *his-3*). The double deletion strain  $\Delta cdt-1\Delta cdt-2$  resulted from a cross between  $\Delta cdt-1$  and  $\Delta cdt-2$  using previously described methods [21]. Strains Pc-*cdt-2* and Pn-*cdt-2* were the  $\Delta cdt-2$  complemented strains carrying

either the *ccg-1* promoter (Pc) or the native promoter (Pn) of *cdt-2*. The complemented strains were constructed by transforming the plasmid pMF272-*Pccg-1-cdt2-GFP* and pMF272-native-*cdt2-GFP* into  $\Delta cdt-2 his-3$ , which was obtained from a cross between  $\Delta cdt-2$  and a *his-3* mutant strain. All of the constructed *N. crassa* strains were verified by PCR (Figure S1 in File S1).

To obtain conidia, *N. crassa* was grown on slant tubes containing Vogel's minimal media with 2% (w/v) sucrose (MM) for 10 days at 28°C. The 50×Vogel's salts was prepared as previously described [22]. For liquid cultures, *N. crassa* was cultivated in 100 ml Vogel's salts with different carbon sources at 2% (w/v). The carbon sources included glucose, xylose, cellobiose, xylohextrian (cat. no. 245-00751), Avicel PH-101, and xylan (Birchwood, cat. no. X0502). All carbon sources were purchased from Sigma-Aldrich, except xylohextrian, which was obtained from Wako. 100 ml cultures were inoculated with 10<sup>6</sup> conidia per ml. For biomass measurement, all cultures were grown at 25°C for 1–3 days at 200 rpm. For gene expression level measurement, the *N. crassa* wild type strains were cultured in 2% (w/v) glucose, cellobiose, xylohextrian and xylan for 16 h, xylose for 22 h and Avicel for 30 h respectively in order to obtain cultures with similar hyphal development.

### Complementation of $\Delta cdt-2$ and Subcellular Localization of CDT-2-GFP in *N. Crassa*

All plasmids and primers used in this study are listed in Table 1 and Table S1, respectively. *cdt-2*, with a 1000-bp upstream region, was PCR amplified from wild-type *N. crassa* genomic DNA using the primers  $\Delta CDT2-F-N$  and  $\Delta CDT2-R-N$ . After digestion with *NotI* and *PacI*, the fragment was inserted into plasmid pMF272, which carries GFP next to the multiple cloning sites. The resulting plasmid was designated as pMF272-native-*cdt2-GFP*. The plasmid pMF272-*Pccg-1-cdt2-GFP* was a kind gift from the laboratory of Prof. Louise Glass from U. C. Berkeley [23]. The resulting plasmids were transformed into strain  $\Delta cdt-2 his-3$ , which was obtained from a cross between  $\Delta cdt-2$  and *his-3* strains. The transformation was conducted according to Vann [24]. The resulting complemented strains were named Pc-*cdt-2* and Pn-*cdt-2*. For biomass measurement, the strains were cultured in 100 ml Vogel's salts containing 2% (w/v) xylan for 3 days. For gene

**Table 1.** Strains and plasmids used in this study.

| Strain                         | Genotype/comment                                                      | source     |
|--------------------------------|-----------------------------------------------------------------------|------------|
| <i>N. crassa</i>               |                                                                       |            |
| wild type                      | FGSC2489                                                              | FGSC       |
| $\Delta cdt-1$                 | FGSC 16575, <i>cdt-1</i> deletion strain                              | FGSC       |
| $\Delta cdt-2$                 | FGSC 17868, <i>cdt-2</i> deletion strain                              | FGSC       |
| $\Delta cdt-1\Delta cdt-2$     | Double deletion strain of <i>cdt-1</i> and <i>cdt-2</i>               | This study |
| <i>his-3</i>                   | FGSC 6103, <i>his-3</i> mutant strain                                 | FGSC       |
| $\Delta cdt-2 his-3$           | Double deletion strain of <i>his-3</i> and <i>cdt-2</i>               | This study |
| Pc- <i>cdt-2</i>               | <i>his-3</i> ::pMF272- <i>Pccg-1-cdt2-GFP</i> ; $\Delta cdt-2 his-3$  | This study |
| Pn- <i>cdt-2</i>               | <i>his-3</i> ::pMF272-native- <i>cdt2-GFP</i> ; $\Delta cdt-2 his-3$  | This study |
| CPL-1                          | <i>his-3</i> ::pMF272- <i>Pccg-1-cdt2-GFP</i> ; <i>his-3</i>          | This study |
| plasmids                       |                                                                       |            |
| pMF272- <i>Pccg-1-GFP</i>      | <i>N. crassa</i> GFP tagging vector with <i>ccg-1</i> promoter        | [43]       |
| pMF272- <i>Pccg-1-cdt2-GFP</i> | pMF272- <i>Pccg-1-GFP</i> with cDNA of <i>cdt-2</i>                   | [44]       |
| pMF272-native- <i>cdt2-GFP</i> | pMF272-GFP with cDNA of <i>cdt-2</i> and <i>cdt-2</i> native promoter | This study |

doi:10.1371/journal.pone.0089330.t001

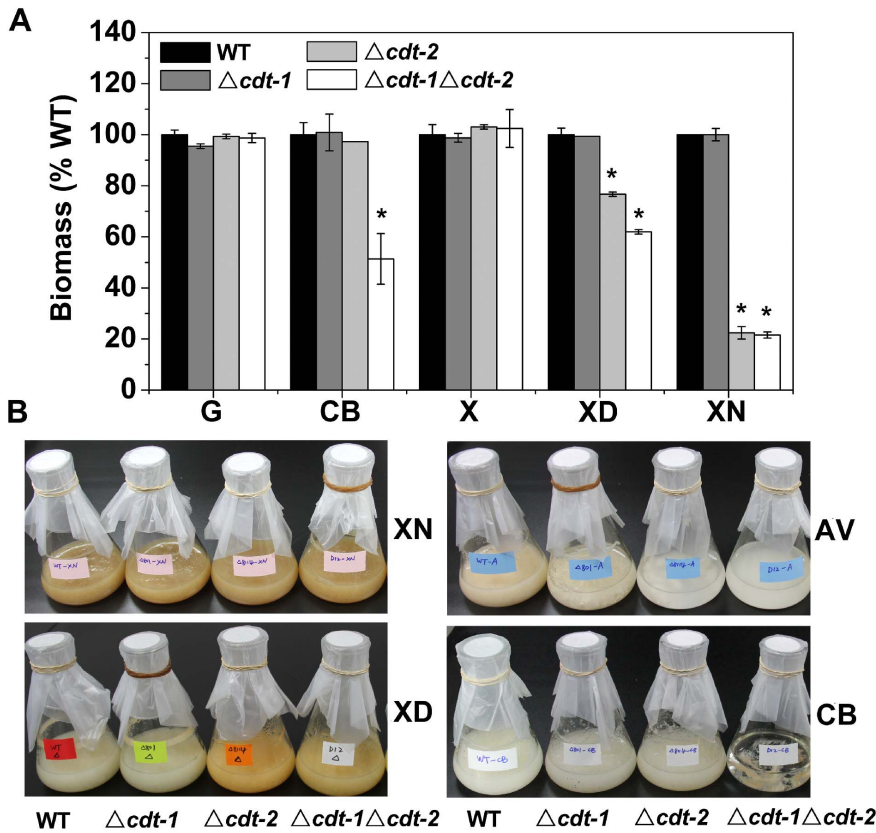

**Figure 1. Growth phenotypes of *cdt* mutants on different carbon sources.** A) The biomass of WT,  $\Delta cdt-1$ ,  $\Delta cdt-2$  and  $\Delta cdt-1\Delta cdt-2$  grown in media with different carbon sources (glucose, cellobiose, xylose, xylohextrin and xylan) at 25°C for 3 days. The mean and standard deviation represent three independent measurements. \* $P < 0.05$  (two sided student's t-test). B) Growth phenotypes of WT,  $\Delta cdt-1$ ,  $\Delta cdt-2$  and  $\Delta cdt-1\Delta cdt-2$  grown in media with different carbon sources (xylan, xylohextrin, Avicel and cellobiose) at 25°C for 3 days. All the media contained Vogel's salts and 2% various carbon sources. G: glucose, CB: cellobiose, AV: Avicel, X: xylose, XD: xylohextrin, XN: xylan. doi:10.1371/journal.pone.0089330.g001

expression analysis, the strains were cultured in 100 ml liquid MM media for 16 h at 25°C. Mycelia were collected and washed with Vogel's salts. Subsequently, the mycelia were transferred into 100 ml Vogel's salts containing 0.5% (w/v) xylan and incubated for an additional 4 h. The mycelia were harvested, and the RNA extraction was performed as previously described [25].

To localize GFP fusion proteins using microscopy, all strains were inoculated in liquid MM medium and grown for 16 h. The hyphae were harvested, washed with Vogel's salts and transferred

into inducing media containing 0.5% (w/v) Avicel or xylan. The cultures were incubated for an additional 4 h at 25°C. Before imaging, the hyphae were incubated with 1  $\mu\text{g/ml}$  DAPI for 15 min. The microscopic observation was performed on a Laser Scanning Confocal Microscope Leica TCS SP5 II (Leica), and Leica Microsystems LAS AF-TCS MP Version: 2.4.1 build 6384 and ImageJ software were used for image processing.

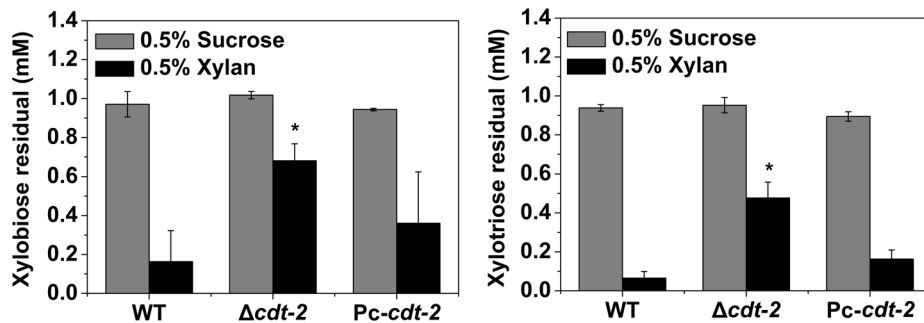

**Figure 2. Xylobiose and xylotriose consumption by WT,  $\Delta cdt-2$  and *Pc-cdt-2*.** All strains were grown in liquid MM media for 16 h and transferred into inducing media with 0.5% xylan or 0.5% sucrose. Ten milliliters of mycelia were collected and incubated with 90  $\mu\text{M}$  of either xylobiose or xylotriose for 15 min. The mean and deviation represent three independent measurements. \* $P < 0.05$  (two sided student's t-test). doi:10.1371/journal.pone.0089330.g002

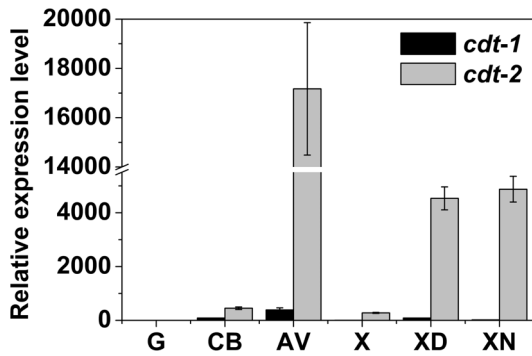

**Figure 3. Gene expression level of *cdt-1* and *cdt-2* on different carbon sources.** Gene expression levels of *cdt-1* and *cdt-2* on different carbon sources (glucose, cellobiose, Avicel, xylose, xyloidextrin and xylan) by qRT-PCR. The wild type strains were grown on different carbon sources at 25°C for 16 h (glucose, cellobiose, xyloidextrin and xylan), 22 h (xylose), or 30 h (Avicel). Gene expression levels of actin (NCU04173) were used as an endogenous control in all samples. Each reaction was done in triplicate. doi:10.1371/journal.pone.0089330.g003

**Xyloidextrin Consumption Assays in *N. Crassa***

Wild type,  $\Delta cdt-2$  and *Pc-cdt-2* strains were grown for 16 h in 100 ml liquid MM at 25°C. The mycelia were harvested through centrifugation at 4°C and 3500×g, washed three times with Vogel’s salts, and subsequently transferred to Vogel’s salts containing 0.5% (w/v) xylan for an additional 4 h of inducing cultivation. A total of 10 ml of the culture was harvested through centrifugation at 4°C and 3500×g, washed three times with Vogel’s salts, and resuspended in 1 ml of double distilled water containing cycloheximide (100 µg/ml) and either 100 µl xylobiose or xylotriose (10 mM). The mycelia were removed through centrifugation after 15 min to measure xylobiose or xylotriose consumption. The amount of sugar remaining in the supernatant was determined by HPLC (Waters e2695 separations Module) with Aminex HPX-87H and Aminex HPX-87P columns (Bio-Rad). The peaks were detected using a Waters 2414 refractive index detector, and 1,4-β-D-xylobiose and 1,4-β-D-xylotriose were purchased from Megazyme (Bray, Ireland).

**Biochemical Methods**

The total extracellular protein content was determined using the Bradford method, with BSA as the standard [26]. The mycelia of 100 ml liquid cultures were collected through vacuum filtration after 3 days of cultivation, enclosed with tin foil, and dried for 17 h at 110°C in a drying oven. The dry weight of the mycelia was measured to determine the biomass. The endoglucanase activity was measured using an azo-CMC kit (S-ACMCL). The xylanase and β-xylosidase activities were measured using a previously published method [27].

**RNA-seq and Data Analysis**

The fungus was inoculated into 100 ml of liquid MM media to a spore concentration of 10<sup>6</sup> conidia per ml, and the cultures were grown for 16 h at 25°C. The mycelia were collected, washed with Vogel’s salts, and subsequently transferred into 100 ml Vogel’s salts with 0.5% (w/v) carbon source (xylan or Avicel) for an additional 4 h of cultivation. The mycelia were collected through filtration and immediately frozen in liquid nitrogen. The RNA was extracted as previously described [25]. Total RNA was treated with DNase I (Turbo DNA-free kit; Ambion), and the RNA was subsequently used for either RNA-seq or qRT-PCR experiments.

mRNA sequencing was performed at BGI (Shenzhen, China). The sequenced libraries were mapped against the *N. crassa* OR74A genome (version 12) with less than two-base mismatching, using Tophat (version 2.0.8b) [28]. The alignment results were stored in SAM format files for subsequent analysis. Read counts uniquely mapped to only one gene in predicted transcripts (version 7) were calculated for every individual gene using HTseq-count (<http://www-huber.embl.de/users/anders/HTSeq>) using SAM files and genome annotation as input. The normalized expression values for each gene were calculated using the number of uniquely mapped reads per kilobase of exon region per million mapped reads (RPKM). DEGseq software was used to identify the differentially expressed genes for RNA-seq data from different samples, the P-value was determined by Fisher’s exact test and Likelihood ratio test [29]. The three raw RNA-seq data sets generated in this study (WT exposure to xylan for 4 h, *cdt-2* mutant exposure to Avicel for 4 h, and *cdt-2* mutant exposure to xylan for 4 h) are available in the GEO database (GSE44673; <http://www.ncbi.nlm.nih.gov/geo/>). The RNA-seq data of WT exposed to Avicel for 4 h was downloaded from NCBI (GSE36719) [9], and the RNA-seq data

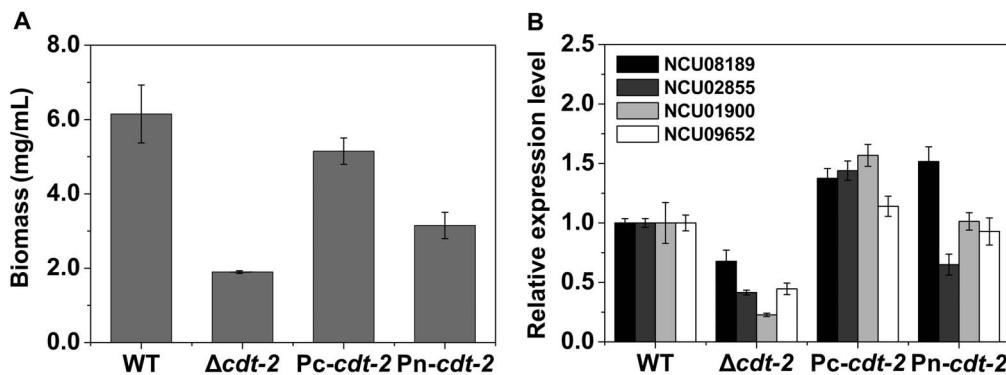

**Figure 4. The complementation of *cdt-2* in *N. crassa*.** A) The biomass of *Pc-cdt-2* (*his-3::pMF272-Pccg-1-cdt2-GFP*;  $\Delta cdt-2$ ), *Pn-cdt-2* (*his-3::pMF272-native-cdt2-GFP*;  $\Delta cdt-2$ ), WT and  $\Delta cdt-2$  strains, which were grown on Vogel’s salts medium with 2% xylan as a carbon source at 25°C for 3 days. The mean and standard deviation represent three independent measurements. B) Gene expression levels of hemicellulase genes (NCU08189, NCU02855, NCU01900 and NCU09652) in WT, *cdt-2* mutant, *Pc-cdt-2*, and *Pn-cdt-2* strains by qRT-PCR. All strains were grown in liquid MM media for 16 h, then transferred into 0.5% xylan for an additional 4 h of cultivation. Gene expression levels of actin (NCU04173) were used as an endogenous control in all samples. Each reaction was done in triplicate. doi:10.1371/journal.pone.0089330.g004

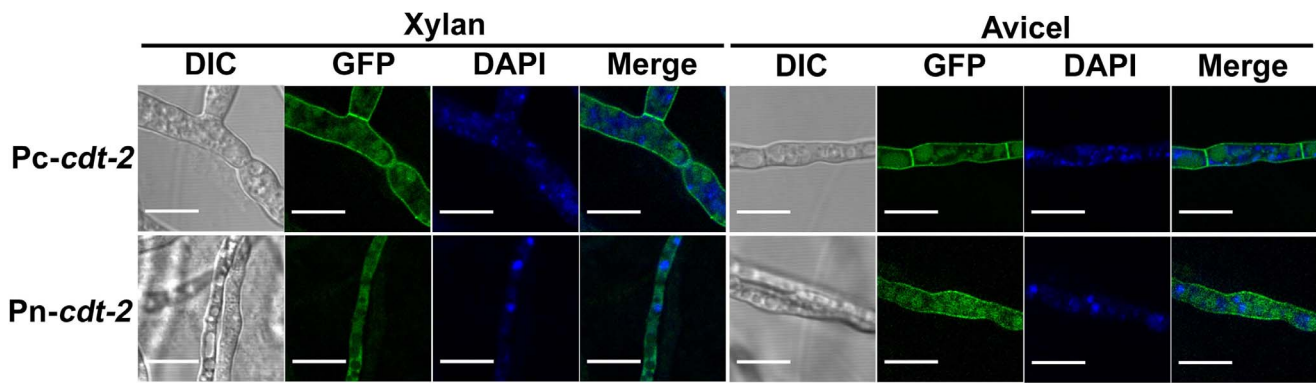

**Figure 5. Microscopic observation of CDT-2 subcellular localization in *N. crassa*.** *Pc-cdt-2* and *Pn-cdt-2* were grown in liquid MM media for 16 h and transferred into inducing media with Vogel’s salts and either 0.5% xylan or 0.5% Avicel as carbon source at 25°C for an additional 4 h of cultivation. Microscopic observation was performed by a Laser Scanning Confocal Microscope (Leica TCS SP5 II). The nuclei were stained by DAPI. Scale bar = 10 μm.

doi:10.1371/journal.pone.0089330.g005

of WT exposure to no carbon for 4 h was downloaded from NCBI (GSE35227) [16].

**Overexpression of *cdt-2* in *N. crassa***

For *cdt-2* overexpression in *N. crassa*, the plasmid pMF272-*Pccg-1-cdt2-GFP* was transformed into a wild type *his-3* strain (FGSC 6103). This *cdt-2* overexpression strain was designated as CPL-1. For the gene expression analysis, the wild type strain and CPL-1 were pre-cultured in MM for 16 h and transferred to inducing conditions (2% Avicel or 2% xylan) for an additional 24 h of cultivation. For enzyme activity measurements (endoglucanase activity, xylanase activity and β-xylosidase activity), the wild type strain and CPL-1 were cultured for 5 days in 2% (w/v) Avicel or 2% (w/v) xylan medium.

**Real-time Quantitative Reverse Transcription PCR**

Real-Time quantitative Reverse Transcription PCR (qRT-PCR) was performed through two-step RT-PCR using the iScript cDNA Synthesis Kit and IQ SYBR Green Supermix according to the manufacturer’s instructions (Bio-Rad). The primers used are listed in Table S1. Each reaction was done in triplicate. Actin expression (NCU04173) was used as an endogenous control for normalization as previously described [30].

**Results**

**Δ*cdt-2*, but not Δ*cdt-1*, Shows a Severe Growth Defect on Hemicellulose**

Previously, CDT-1 and CDT-2 were identified as cellobextrin transporters [11]. Δ*cdt-2* showed a significant growth defect on

**Table 2.** Down-regulated genes related to polysaccharide metabolism in Δ*cdt-2* strain compared with WT on both Avicel and xylan media.

| Locus    | Gene annotation                       | RPKM value-AV <sup>b</sup> |                | Fold change | RPKM value-XN <sup>c</sup> |                | Fold change |
|----------|---------------------------------------|----------------------------|----------------|-------------|----------------------------|----------------|-------------|
|          |                                       | WT                         | Δ <i>cdt-2</i> |             | WT                         | Δ <i>cdt-2</i> |             |
| NCU09923 | β-xylosidase                          | 34                         | 3              | 12.1        | 258                        | 31             | 8.3         |
| NCU09652 | β-xylosidase                          | 694                        | 134            | 5.2         | 746                        | 287            | 2.6         |
| NCU09582 | chitin deacetylase                    | 410                        | 3              | 120.8       | 44                         | 5              | 8.4         |
| NCU09175 | β-1,3-endoglucanase EglC <sup>a</sup> | 1241                       | 657            | 1.9         | 780                        | 626            | 1.2         |
| NCU08755 | β-glucosidase 1                       | 1567                       | 404            | 3.9         | 170                        | 113            | 1.5         |
| NCU08384 | xylose reductase                      | 2736                       | 280            | 9.8         | 8034                       | 1541           | 5.2         |
| NCU08189 | endo-1,4-β-xylanase                   | 8536                       | 860            | 9.9         | 4778                       | 2743           | 1.7         |
| NCU05751 | cellulose-binding protein             | 74                         | 1              | 67.6        | 47                         | 14             | 3.3         |
| NCU05159 | acetylxylan esterase                  | 2066                       | 46             | 45.4        | 540                        | 108            | 5.0         |
| NCU04870 | acetyl xylan esterase                 | 867                        | 19             | 46.6        | 174                        | 32             | 5.5         |
| NCU01906 | aldehyde reductase                    | 136                        | 46             | 3.0         | 552                        | 94             | 5.9         |
| NCU01900 | xylosidase/arabinosidase              | 2023                       | 108            | 18.8        | 1689                       | 289            | 5.9         |
| NCU00709 | β-xylosidase                          | 41                         | 6              | 7.4         | 229                        | 60             | 3.8         |
| NCU00130 | β-glucosidase                         | 5277                       | 396            | 13.3        | 97                         | 52             | 1.9         |

<sup>a</sup>GPI-anchored cell wall β-1,3-endoglucanase EglC.

<sup>b</sup>Avicel.

<sup>c</sup>xylan.

doi:10.1371/journal.pone.0089330.t002



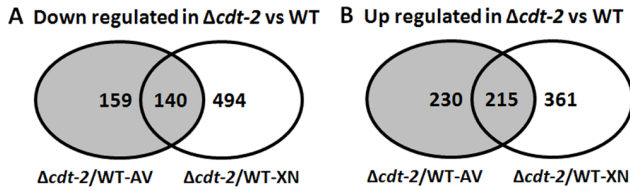

**Figure 6. Venn diagram of the transcriptome comparison of WT and  $\Delta cdt-2$  on either Avicel or xylan.** A) The genes that show a statistically significant down-regulation in expression level in  $\Delta cdt-2$  compared with WT on xylan or Avicel. Fourteen genes that were down-regulated on both Avicel and xylan in the  $\Delta cdt-2$  strain compared with WT are related to polysaccharide metabolism (Table 2). B) The genes that show a statistically significant up-regulation in expression level in  $\Delta cdt-2$  compared with WT on xylan or Avicel. Functat analyses of all gene sets are available in the Table S2. The wild type and  $\Delta cdt-2$  strains were grown in liquid MM media for 16 h, then transferred into 0.5% xylan or 0.5% Avicel for an additional 4 h of cultivation. doi:10.1371/journal.pone.0089330.g006

cellulose, while  $\Delta cdt-1$  grew similarly to wild-type *N. crassa* [11]. So far, the growth of these *cdt* mutants has only been assessed on media with sucrose and Avicel as carbon sources [11]. To further examine the function of *cdt-1* and *cdt-2* in lignocellulose degradation and utilization, we analyzed the growth of single and double mutants of *cdt-1* and *cdt-2* on different carbon sources (Figure 1). The mutants resulted in no obvious phenotype with glucose or xylose as the carbon source compared with the wild type strain. Under cellobiose growth conditions, the single deletion of *cdt-1* or *cdt-2* has the same phenotype as the wild type strain, but

biomass production in the  $\Delta cdt-1\Delta cdt-2$  strain was only 51% of the wild-type level. No growth of the double knock out strain on Avicel was observed and its conidia did not germinate (data not shown). These results are consistent with previous data that *cdt-1* and *cdt-2* are both cellodextrin transporters, with redundant functions in cellobiose and cellodextrin transport [11]. Surprisingly, the *cdt-2* single deletion strain grew poorly on birchwood xylan, and produced 22% of the biomass of the wild type strain (Figure 1). A growth deficiency was also observed on xylohextrin medium (77% biomass of wild type), but not on xylose (Figure 1). In contrast to the cellulose conditions, the double knock out strain  $\Delta cdt-1\Delta cdt-2$  showed a similar phenotype as the single deletion strain  $\Delta cdt-2$  under xylan and xylohextrin conditions, particularly for the xylan condition. The observed mutant phenotypes strongly suggest that CDT-2, but not CDT-1, possesses important functions for xylan (hemicellulose) utilization in *N. crassa*. Therefore, we mainly focused on analysis of CDT-2 function during hemicellulose degradation in this study.

**The Efficiency of Xylohextrin Consumption by the  $\Delta cdt-2$  Mutant is Significantly Lower than WT in *N. crassa***

The observed growth defect of the *cdt-2* mutant on birchwood xylan suggested that CDT-2 plays a critical role in hemicellulose degradation and utilization. CDT-2 is a cellodextrin transporter, and the cellodextrin consumption capability of  $\Delta cdt-2$  mutants is reduced compared to WT [11]. We hypothesized that the mechanism by which CDT-2 affects cellulose and hemicellulose utilization might be similar. To test this hypothesis, xylobiose and xylohextrin consumption assays were performed in  $\Delta cdt-2$  and wild type strains. The consumption assay showed that the xylohextrin

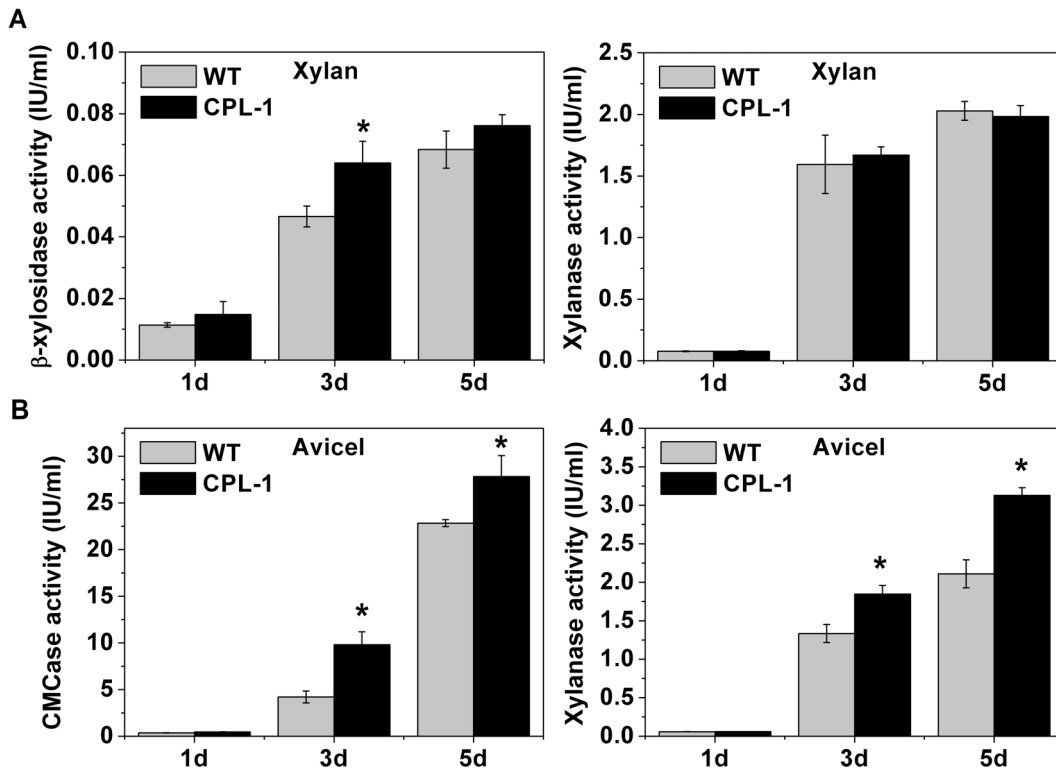

**Figure 7. Enzyme activity of culture supernatants of wild type and CPL-1 strains.** A)  $\beta$ -xylosidase activity and xylanase activity of wild type strain and *cdt-2* overexpression strain CPL-1 on xylan for 1, 3 and 5 days of cultivation. B) Endoglucanase activity and xylanase activity of WT and CPL-1 on Avicel for 1, 3 and 5 days of cultivation. The mean and deviation showed are three independent measurements. \* $P < 0.05$  (two sided student's t-test). doi:10.1371/journal.pone.0089330.g007

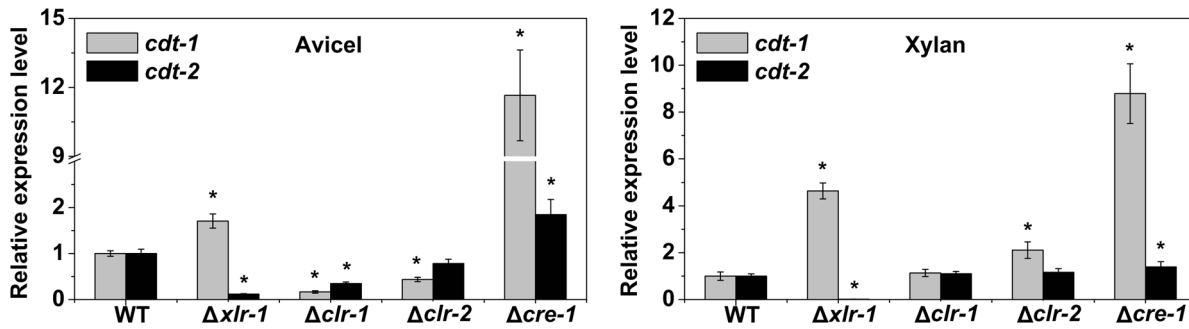

**Figure 8. Relative expression levels of *cdt-2* and *cdt-1* in different mutants determined by qRT-PCR.** The mutants carrying deletions for different transcription factors ( $\Delta xlr-1$ ,  $\Delta clr-1$ ,  $\Delta clr-2$  and  $\Delta cre-1$ ) were grown in liquid MM media for 16 h, then transferred into 0.5% xylan or 0.5% Avicel for an additional 4 h of cultivation. Gene expression levels of actin (NCU04173) were used as an endogenous control in all samples. Each reaction was done by triplicate. \* $P < 0.05$  (two sided student's t-test). doi:10.1371/journal.pone.0089330.g008

consumption of the  $\Delta cdt-2$  strain was significantly reduced compared with wild type (Figure 2). This result suggested that the mode of CDT-2 recognition of hemicellulose and cellulose is similar, and may involve in sensing and/or uptaking of the oligosaccharides cellodextrin or xylo-dextrin, which are derived from the solid polymers of cellulose and hemicellulose.

### The *cdt-1* and *cdt-2* Expression Pattern is Different During Growth on a Variety of Carbon Sources

The *cdt-2* mutant had a clear phenotype, but the *cdt-1* mutant was similar to wild type, suggesting differences in the function of these two cellodextrin transporters [11]. In order to further explore the molecular basis of the phenotypes we observed in the two transporter mutants, we investigated the expression pattern of both *cdt-1* and *cdt-2* during growth on several different carbon sources (Figure 3). In general, expression levels of *cdt-2* were higher than *cdt-1*, and *cdt-2* was induced by wider range of substrates (Figure 3, Figure S2 in File S1). Specifically, *cdt-2* was induced to a much higher expression level than *cdt-1* during growth on Avicel, and *cdt-2* expression was induced by xylan and xylo-dextrin. No significant induction was observed for *cdt-1* under the same conditions. The expression data support the hypothesis that CDT-2 is a critical component in both cellulose and hemicellulose degradation and utilization.

### CDT-2 is Localized to the Cell Membrane during Growth on Both Cellulose and Hemicellulose

In order to assess CDT-2 sub-cellular localization in both cellulose and hemicellulose conditions, the *cdt-2* ORF was fused to GFP under the control of either *ccg-1* promoter [31] or its native promoter, and each construct was reintroduced into the *cdt-2* deletion strain. The biomass and xylo-dextrin consumption defect were partially restored in the resulting strains (Figure 4, Figure 2), and the hemicellulase gene expression phenotype was almost completely restored suggesting a functional GFP-tagged CDT-2 protein. Based on the GFP signal, CDT-2 is primarily located in the plasma membrane (Figure 5). Interestingly, we also observed localization of CDT-2 at the septum.

### Transcriptome Analysis of $\Delta cdt-2$ on Xylan and Avicel

To further explore the genome-wide effects of CDT-2 during cellulose and hemicellulose degradation and utilization, we performed a transcriptome comparison analysis of  $\Delta cdt-2$  and the wild type strain in response to Avicel and xylan using RNA-seq technology [32,33] (Table S2 P1).

Consistent with the observed growth defects of the *cdt-2* mutant, 299 and 634 genes were significantly down-regulated in  $\Delta cdt-2$  compared with wild type in response to Avicel and xylan, respectively. A set of 140 genes was down-regulated under both conditions (Figure 6A). In this set of 140 genes, fourteen genes were related to polysaccharide metabolism according to FunCat analysis [34] (Table S2 P2), including seven hemicellulase genes: NCU09923 ( $\beta$ -xylosidase, *gh3-7*), NCU09652 ( $\beta$ -xylosidase, *gh43-5*), NCU08189 (endo-1,4- $\beta$ -xylanase, *gh10-2*), NCU05159 (acetyl xylan esterase), NCU4870 (acetyl xylan esterase), NCU01900 (xylosidase/arabinoxidase, *gh43-2*), and NCU00709 ( $\beta$ -xylosidase, *gh3-8*), and other carbohydrate metabolism enzymes (Table 2). Among the down-regulated genes in  $\Delta cdt-2$ , a much larger group of genes (494 genes) were specifically down-regulated on xylan, while 159 were specifically down-regulated on Avicel (Figure 6A). In the group of 494 genes down-regulated on xylan, many genes were not directly involved in xylan degradation, including proteins with binding functions or cofactor requirements (structural or catalytic), metabolism, protein synthesis, and energy (Table S2 P3). This suggests that the *cdt-2* mutation caused a tremendous nutritional challenge for the mutant, leading to the down regulation of many pathways to ensure survival [35]. Thirty one genes in the set of 159 genes down-regulated specifically on Avicel were related to polysaccharide metabolism, containing many cellulase and hemicellulase genes, including several key cellulase genes, such as NCU07340 (cellobiohydrolase-1, *cbh-1*), NCU09680 (cellobiohydrolase-2, *cbh-2*), and NCU01050 (endo-glucanase II, *gh61-4*) (Table S2 P4).

In addition, a total of 445 and 576 genes were up-regulated in *cdt-2* deletion strain on Avicel and xylan, respectively, with 215 overlapping genes (Figure 6B). On xylan, 361 genes were specifically up-regulated in the  $\Delta cdt-2$  strain compared with the wild type strain. According to the FunCat analysis, many genes encoding sugar transporters are up-regulated in  $\Delta cdt-2$ , including NCU00821, NCU01132, NCU05853, NCU02188, and NCU04963 (Table S2 P5). These observations suggest that the fungus is responding to the nutrition limitation caused by the *cdt-2* mutation, and this response has some overlap with the response to a no carbon condition [35] (Figure S3 in File S1). The deletion of *cdt-2* also induced a starvation effect under Avicel conditions, but this effect was not as strong as in the xylan condition, suggesting that redundant functions for growth on Avicel exist between CDT-2 and its homolog CDT-1. Interestingly, the ROS (reactive oxygen stress) regulator Nap1 (NCU03905) and one of its target genes, peroxidase (NCU00355) [36,37], were up-regulated under the

Avicel condition, suggesting that ROS stress is generated during cellulose degradation when CDT-2 is deleted (Table S2 P6).

### Overexpression of *cdt-2* Increased Cellulase and Hemicellulase Gene Expression in *N. crassa*

The deletion of *cdt-2* caused numerous cellulase and hemicellulase genes to be down-regulated, and thus higher cellulase and hemicellulase production may result from *cdt-2* overexpression. We tested this idea by placing *cdt-2* under the *cgg-1* promoter [31], and transformed this construct into the WT background (FGSC 6103). The resulting strain, called CPL-1, contains one extra copy of *cdt-2*. As expected, the major cellulase and hemicellulase genes were up-regulated in the CPL-1 strain under Avicel and xylan conditions, respectively, as determined through qRT-PCR analysis (Figure S4 in File S1). We also measured endoglucanase, xylanase and  $\beta$ -xylosidase activities for 1, 3 and 5 day old CPL-1 cultures. Under Avicel conditions, the activities of all three enzymes in the CPL-1 strain were significantly higher than those in the wild type strain. The  $\beta$ -xylosidase activity was higher in the CPL-1 strain under xylan conditions, and the xylanase activity was not significantly different. As expected, no endoglucanase activity was detected since xylan cannot induce cellulases in *N. crassa* (Figure 7).

### The Regulation of CDT-2 is Different from CDT-1 in *N. crassa*

The transcription factors CLR-1, CLR-2 [16], XLR-1 [19] and CRE-1 [38] are major regulators of cellulose and hemicellulose degradation in *N. crassa*. To determine whether *cdt-1* and *cdt-2* are regulated by these transcription factors during cellulose and hemicellulose degradation, the relative expression level of the two transporter genes was measured by qRT-PCR in deletion mutants of the four transcription factors (Figure 8). The deletion of the cellulose degradation regulator gene *clr-1* significantly affected the expression of both *cdt-1* and *cdt-2* on Avicel. However, *cdt-1* expression was more affected than that of *cdt-2*. Under Avicel conditions, *cdt-1* expression was nearly undetectable without *clr-1* but mildly affected by the deletion of *clr-2*. In the *xlr-1* mutant, *cdt-2* expression was almost completely suppressed under both Avicel and xylan conditions, while *cdt-1* expression was up-regulated under both conditions. These results suggest that XLR-1 is the major regulator for *cdt-2*, whereas *cdt-1* is primarily regulated by CLR-1. Both *cdt-1* and *cdt-2* are up-regulated in a  $\Delta cre-1$  strain on Avicel and xylan, suggesting that CRE-1 does not directly regulate these transporters, which is consistent with the induction of cellulase and hemicellulase through general CCR (carbon catabolite repression) derepression. In summary, the two cellobiose transporters are regulated differently in *N. crassa* (Figure S5 in File S1).

### Discussion

CDT-1 and CDT-2 are two important cellobiose transporters in *N. crassa*, and these transporters play critical roles in cellulose degradation [11]. By comprehensive analysis of the two transporters' gene expression patterns and phenotypes on a variety of carbon sources, including the cellulose and hemicellulose, we found that only CDT-2 is also involved in hemicellulose degradation and utilization. As far as we know, only transporters affecting cellulose (but not hemicellulose) degradation have been reported, including Stp1 and Crt1 in *T. reesei* [12], CdtC and CdtD in *Penicillium oxalicum* [14] and CDT-1 and CDT-2 in *N. crassa* [9,11]. This is the first time a sugar transporter has been assigned a function in hemicellulose sensing and utilization.

Xylan is a complex and heteropolymeric hemicellulosic polymer, which mainly consists of xylose and arabinose with some glucuronyl, feruloyl, and acetyl groups [39]. Xylan itself is a very powerful inducer for hemicellulase production, and its xylodextrin derivatives can also serve as inducers. Xylobiose or xylooligosaccharide can also induce hemicellulase production, as has been reported in *Aspergillus nidulans* [40], *Thermoascus aurantiacus* [10] and *T. reesei* [41]. The mechanism by which these microbes sense hemicellulose remains unknown.

During the revision of this manuscript, both CDT-1 and CDT-2 were suggested as transceptors for cellobiose involved in cellulose sensing [42], and here we show evidence of *cdt-2* involvement in hemicellulose sensing and utilization. As a possible transceptor, CDT-2 has a dual function of both transporter and receptor. The mechanisms for sensing hemicellulose might be similar to that of cellulose, through sensing and/or uptaking the putative lignocellulase inducers cellobiose and xylodextrin. Using the yeast system, the preliminary data we had implicated that the CDT-2 might have capability of xylodextrin transport (Figure S6 and Figure S7 in File S1). Currently, how CDT-2 senses cellobiose, such as structural-based information, is not clear. Similarly, although we know that deletion of *cdt-2* greatly affects hemicellulase synthesis and hemicellulose degradation in *N. crassa*, the detailed mechanism of how the CDT-2 senses xylodextrin requires further experiments.

Although both CDT-1 and CDT-2 were suggested to be cellobiose transporters [42], based on our analysis of the differences of CDT-1 and CDT-2, we would suggest that only CDT-2 is a transceptor, and involved not only in cellulose sensing but also in hemicellulose sensing as well. CDT-1 appears to be purely a cellobiose transporter, based on its expression pattern and lack of growth defects for the *cdt-1* mutant on a variety of tested carbon sources. The cellobiose transport activity of CDT-1 was higher than that of CDT-2, with better maximum velocity ( $V_{max}$ ) in engineered yeast [11]. Considering CDT-2 as a transceptor of cellobiose and possible xylodextrin, it is a good target protein to start exploring novel components of the lignocellulose sensing pathway.

### Supporting Information

**Table S1** Primers used in cloning and quantitative real-time PCR.

(XLSX)

**Table S2** Dataset of transcriptome analysis.

(XLSX)

**File S1** Includes Figure S1–S7. **Figure S1.** The strain verification of  $\Delta cdt-1$ ,  $\Delta cdt-2$ ,  $\Delta cdt-1\Delta cdt-2$  (A) and Pn-*cdt-2*, Pc-*cdt-2*, CPL-1 (B) by PCR. **Figure S2.** The expression kinetics of *cdt-1* and *cdt-2* on Avicel and xylan. Gene expression levels of *cdt-1* and *cdt-2* in WT under different time points. Cultures were inoculated with WT conidia on MM medium for 16 h growth (SU-16 h), on 2% Avicel medium for 30 h growth (AV-30 h), for 2 d growth (AV-2 d) and for 3 d growth (AV-3 d), or on 2% xylan for 1 day (XN-1 d), 2 days (XN-2 d) and 3 days (XN-3 d). **Figure S3.** The transcriptome comparison of  $\Delta cdt-2$  response to Avicel/xylan with WT response to no carbon. A) The genes that showed a statistically differential expression (analyzed by DEGseq, see the detail procedure in method of text) in WT exposed to no carbon compared with  $\Delta cdt-2$  on xylan, using data of WT on xylan as reference. B) The genes that showed a statistically differential expression in WT exposed to no carbon compared with  $\Delta cdt-2$  on Avicel, using data of WT on Avicel as reference. The differentially



expressed genes and their functions are listed in supplement material (Table S2 P7). **Figure S4.** Relative expression levels of cellulase and hemicellulase genes in wild type and CPL-1 strains A) Relative expression levels of major cellulase genes (NCU07340, NCU09680 and NCU00762) and *cdt-2* (NCU08114) in WT and *cdt-2* overexpression strain CPL-1 on Avicel conditions by qRT-PCR. B) Relative expression levels of major hemicellulase genes (NCU08189, NCU04870 and NCU01900) and *cdt-2* (NCU08114) in WT and CPL-1 strains on xylan conditions by qRT-PCR. All the strains were grown in liquid MM media for 16 h, then transferred into 2% xylan or 2% Avicel for an additional 24 h of cultivation. The actin gene (NCU04173) was used as an endogenous control in all samples. Each reaction was done by triplicate. \* $P < 0.05$ . **Figure S5.** The regulation of CDT-1 and CDT-2 in *N. crassa*. Both CDT-1 and CDT-2 transport cellobiose and cellodextrin, which degraded from cellulose by cellulase. CDT-2 may transport xylobiose and xylohexaose, which degraded from hemicellulose by hemicellulase. *cdt-2* is primarily regulated by XLR-1. *cdt-1* is mainly regulated by CLR-1 and CLR-2 on Avicel. Besides the primary regulation, there are cross regulation for *cdt-1* and *cdt-2* by CLR-1. **Figure S6.** Hydrolysis of xylohexaose by the recombinant *S. cerevisiae* strain. A) SDS-PAGE gel of purified intracellular  $\beta$ -xylosidase (Figure S7). Lane M, protein molecular weight standards (kDa). Lane 1,  $\beta$ -xylosidase after purification

over nickel-NTA resin. On the left, the molecular weights (kDa) are shown. B) The hydrolysis activity analysis of purified  $\beta$ -xylosidase<sup>b</sup> using xylobiose (XB) and xylohexaose (XH) as substrates. The data represent the average of three technical replicates with the standard deviation. C) Intracellular D-xylose accumulation of recombinant *S. cerevisiae* strain E(*gh43-2+cdt-2*)<sup>a</sup> containing *cdt-2* and *gh43-2*<sup>c</sup>. The error bar is the standard deviation of triplicate measurements. ND: not detectable. **Figure S7.** Extracellular and intracellular  $\beta$ -xylosidase activity of the recombinant strain E(*gh43-2*) and the control strain E(423P). No any xylosidase activity was detected in extracellular supernatant of recombinant strain. (DOCX)

## Acknowledgments

The authors wish to thank Prof. Eckhard Boles for kindly providing the *S. cerevisiae* EBV.VW4000 strain, Miss Lixian Wang for assistance with Confocal Microscopy observation, Dr. Elizabeth Hutchison for critical reading and comments concerning the manuscript.

## Author Contributions

Conceived and designed the experiments: PC CT YM. Performed the experiments: PC RG LW. Analyzed the data: BW JL. Contributed reagents/materials/analysis tools: PC RG BW JL LW. Wrote the paper: PC CT.

## References

- Lynd LR, Weimer PJ, van Zyl WH, Pretorius IS (2002) Microbial cellulose utilization: fundamentals and biotechnology. *Microbiol Mol Biol Rev* 66: 506–577.
- Sims RE, Mabee W, Saddler JN, Taylor M (2010) An overview of second generation biofuel technologies. *Bioresour Technol* 101: 1570–1580.
- Kubicek CP, Messner R, Gruber F, Mach RL, Kubicek-Pranz EM (1993) The *Trichoderma* cellulase regulatory puzzle: From the interior life of a secretory fungus. *Enzyme Microb Technol* 15: 90–99.
- Suto M, Tomita F (2001) Induction and catabolite repression mechanisms of cellulase in fungi. *J Biosci Bioeng* 92: 305–311.
- Berlin A, Maximenko V, Gilkes N, Saddler J (2007) Optimization of enzyme complexes for lignocellulose hydrolysis. *Biotechnol Bioeng* 97: 287–296.
- Dien BS, Ximenes EA, O'Bryan PJ, Moniruzzaman M, Li XL, et al. (2008) Enzyme characterization for hydrolysis of AFEX and liquid hot-water pretreated distillers' grains and their conversion to ethanol. *Bioresour Technol* 99: 5216–5225.
- Wood TM, McCrae SI (1986) The effect of acetyl groups on the hydrolysis of ryegrass cell walls by xylanase and cellulase from *Trichoderma koningii*. *Phytochemistry* 25: 1053–1055.
- Vaheri M, Vaheri MO, Kauppinen V (1979) Formation and release of cellolytic enzymes during growth of *Trichoderma reesei* on cellobiose and glycerol. *Eur J Appl Microbiol Biotechnol* 8: 73–80.
- Znameroski EA, Coradetti ST, Roche CM, Tsai JC, Iavarone AT, et al. (2012) Induction of lignocellulose-degrading enzymes in *Neurospora crassa* by cellodextrins. *Proc Natl Acad Sci U S A* 109: 6012–6017.
- Brienzo M, Monte JR, Milagres AM (2012) Induction of cellulase and hemicellulase activities of *Thermoascus aurantiacus* by xylan hydrolyzed products. *World J Microbiol Biotechnol* 28: 113–119.
- Galazka JM, Tian C, Becson WT, Martínez B, Glass NL, et al. (2010) Cellodextrin transport in yeast for improved biofuel production. *Science* 330: 84–86.
- Zhang W, Kou Y, Xu J, Cao Y, Zhao G, et al. (2013) Two major facilitator superfamily sugar transporters from *Trichoderma reesei* and their roles in induction of cellulase biosynthesis. *J Biol Chem* 288: 32861–32872.
- Ivanova C, Baath JA, Seiboth B, Kubicek CP (2013) Systems analysis of lactose metabolism in *Trichoderma reesei* identifies a lactose permease that is essential for cellulase induction. *PLoS ONE* 8: e62631.
- Li J, Liu G, Chen M, Li Z, Qin Y, et al. (2013) Cellodextrin transporters play important roles in cellulase induction in the cellolytic fungus *Penicillium oxalicum*. *Appl Microbiol Biotechnol*.
- Ha SJ, Galazka JM, Rin Kim S, Choi JH, Yang X, et al. (2010) Engineered *Saccharomyces cerevisiae* capable of simultaneous cellobiose and xylose fermentation. *Proc Natl Acad Sci U S A* 108: 504–509.
- Coradetti ST, Craig JP, Xiong Y, Shock T, Tian C, et al. (2012) Conserved and essential transcription factors for cellulase gene expression in ascomycete fungi. *Proc Natl Acad Sci U S A* 109: 7397–7402.
- Van Peij NNME, Visser J, De Graaff LH (1998) Isolation and analysis of xlnR, encoding a transcriptional activator co-ordinating xylanolytic expression in *Aspergillus niger*. *Mol Microbiol* 27: 131–142.
- Stricker AR, Grosstessner-Hain K, Wurleitner E, Mach RL (2006) Xyr1 (xylanase regulator 1) regulates both the hydrolytic enzyme system and D-xylose metabolism in *Hypocrea jecorina*. *Eukaryot Cell* 5: 2128–2137.
- Sun J, Tian C, Diamond S, Glass NL (2012) Deciphering transcriptional regulatory mechanisms associated with hemicellulose degradation in *Neurospora crassa*. *Eukaryot Cell* 11: 482–493.
- McCluskey K (2003) The fungal genetics stock center: from molds to molecules. *Adv Appl Microbiol: Academic Press*. 245–262.
- Davis RH, De Serres FJ (1970) Genetic and microbiological research techniques for *Neurospora crassa*. *Methods Enzymol* 17A: 79–142.
- Vogel HJ (1956) A convenient growth medium for *Neurospora*. *Microbiol Genet Bull* 13: 42–46.
- Sun J, Phillips CM, Anderson CT, Beeson WT, Marletta MA, et al. (2011) Expression and characterization of the *Neurospora crassa* endoglucanase GH5–1. *Protein Expr Purif* 75: 147–154.
- Vann DC (1995) Electroporation-based transformation of freshly harvested conidia of *Neurospora crassa*. *Fungal Genet Newslett* 42A: 53.
- Tian C, Beeson WT, Iavarone AT, Sun J, Marletta MA, et al. (2009) Systems analysis of plant cell wall degradation by the model filamentous fungus *Neurospora crassa*. *Proc Natl Acad Sci U S A* 106: 22157–22162.
- Bradford MM (1976) A rapid and sensitive method for the quantification of microgram quantities of protein utilizing the principle of protein-dye binding. *Anal Biochem* 72: 248–254.
- Poutanen K, Puls J (1988) Characteristics of *Trichoderma reesei*  $\beta$ -xylosidase and its use in the hydrolysis of solubilized xylans. *Appl Microbiol Biotechnol* 28: 425–432.
- Trapnell C, Roberts A, Goff L, Pertea G, Kim D, et al. (2012) Differential gene and transcript expression analysis of RNA-seq experiments with TopHat and Cufflinks. *Nat Protoc* 7: 562–578.
- Wang L, Feng Z, Wang X, Wang X, Zhang X (2010) DESeq: an R package for identifying differentially expressed genes from RNA-seq data. *Bioinformatics* 26: 136–138.
- Tian C, Beeson WT, Iavarone AT, Sun J, Marletta MA, et al. (2009) Systems analysis of plant cell wall degradation by the model filamentous fungus *Neurospora crassa*. *Proc Natl Acad Sci U S A* 106: 22157–22162.
- McNally M, Free S (1988) Isolation and characterization of a *Neurospora* glucose-repressible gene. *Curr Genet* 14: 545–551.
- Wang Z, Gerstein M, Snyder M (2009) RNA-Seq: a revolutionary tool for transcriptomics. *Nat Rev Genet* 10: 57–63.
- Marguerat S, Bahler J (2010) RNA-seq: from technology to biology. *Cell Mol Life Sci* 67: 569–579.
- Ruepp A (2004) The FunCat, a functional annotation scheme for systematic classification of proteins from whole genomes. *Nucleic Acids Res* 32: 5539–5545.

35. Jones CB, Ott EM, Keener JM, Curtiss M, Sandrin V, et al. (2012) Regulation of membrane protein degradation by starvation-response pathways. *Traffic* 13: 468–482.
36. Takahashi M, Yamashita K, Shiozawa A, Ichiishi A, Fukumori F, et al. (2010) An AP-1-like transcription factor, NAP-1, regulates expression of the glutathione S-transferase and NADH:flavin oxidoreductase genes in *Neurospora crassa*. *Biosci Biotech Bioch* 74: 746–752.
37. Tian C, Li J, Glass NL (2011) Exploring the bZIP transcription factor regulatory network in *Neurospora crassa*. *Microbiology* 157: 747–759.
38. Sun J, Glass NL (2011) Identification of the CRE-1 cellulolytic regulon in *Neurospora crassa*. *PLoS ONE* 6: e25654.
39. Ebringerová A, Heinze T (2000) Xylan and xylan derivatives – biopolymers with valuable properties, 1. Naturally occurring xylans structures, isolation procedures and properties. *Macromol Rapid Comm* 21: 542–556.
40. Piñaga F, Fernández-Espinar MT, Vallés S, Ramón D (1994) Xylanase production in *Aspergillus nidulans*: induction and carbon catabolite repression. *FEMS Microbiol Lett* 115: 319–323.
41. Xu J, Nogawa M, Okada H, Morikawa Y (1998) Xylanase induction by L-sorbose in a fungus, *Trichoderma reesei* PC-3-7. *Biosci Biotech Bioch* 62: 1555–1559.
42. Znameroski EA, Li X, Tsai JC, Galazka JM, Glass NL, et al. (2013) Evidence for tranceptor function of cellodextrin transporters in *Neurospora crassa*. *J Biol Chem*.
43. Freitag M, Hickey PC, Raju NB, Selker EU, Read ND (2004) GFP as a tool to analyze the organization, dynamics and function of nuclei and microtubules in *Neurospora crassa*. *Fungal Genet Biol* 41: 897–910.
44. Sun J, Phillips CM, Anderson CT, Beeson WT, Marletta MA, et al. (2011) Expression and characterization of the *Neurospora crassa* endoglucanase GH5-1. *Protein Expr Purif* 75: 147–154.
