# Supplementary material for: Evidence of a Critical Role for Cellodextrin Transporte 2 (CDT-2) in Both Cellulose and Hemicellulose Degradation and Utilization in Neurospora crassa
Source: PLoS One. 2014 Feb 20;9(2):e89330. doi: 10.1371/journal.pone.0089330 (PMC3930720; doi:10.1371/journal.pone.0089330)
Supplement: Table S2 — Dataset of transcriptome analysis. (XLSX) [file pone.0089330.s002.xlsx]

## Sheet: P1
Locus	WT-AV-rpkm	WT-XN-rpkm	Δcdt-2-AV-rpkm	Δcdt-2-XN-rpkm	no carbon-rpkm
NCU10021	644.776	1767.73	403.258	2999.1	393.904
NCU08002	51.4421	33.187	38.5609	68.9735	59.2234
NCU06522	10.3419	2.86112	8.67041	32.9415	11.2843
NCU05853	4193.66	320.935	2817.68	749.698	183.59
NCU02188	160.667	655.063	166.337	1205.38	130.513
NCU01132	25.1094	99.2651	37.3307	288.033	24.2206
NCU00809	23.2602	21.444	25.8566	58.177	8.82835
NCU00801	1018.41	42.5393	424.373	93.5853	68.3778
NCU00003	13.9488	12.7832	22.825	30.0094	38.2912
NCU00004	22.1956	31.1265	36.4057	49.441	58.3525
NCU00005	20.2939	15.0041	22.8153	21.8677	26.356
NCU00006	25.9219	44.7568	43.4587	39.9604	22.0911
NCU00007	17.3744	12.6701	16.8531	20.8859	18.7454
NCU00008	15.7678	25.0943	15.7376	16.1133	16.0973
NCU00010	60.8164	47.1671	115.687	93.3176	81.9746
NCU00014	23.6478	26.5607	41.2537	28.7216	25.5686
NCU00015	18.2961	16.3528	14.3601	15.1738	16.6971
NCU00017	2.05196	1.4106	1.8754	2.3809	2.24078
NCU00018	223.011	257.962	318.6	263.911	194.777
NCU00019	6.14396	10.0395	7.10683	5.88194	5.96329
NCU00021	0.681523	14.7994	0.629237	0.863508	1.09489
NCU00022	11.3825	9.78916	15.8378	14.382	9.48779
NCU00023	138.996	79.3405	79.5294	83.0783	52.7971
NCU00024	89.0998	51.4608	100.417	96.6071	139.75
NCU00025	86.1822	32.9453	124.009	99.5443	145.926
NCU00026	31.6132	15.3689	36.8312	24.923	44.9441
NCU00027	2.54989	2.52921	3.92506	2.81665	2.35242
NCU00028	14.0729	15.2978	10.2317	12.0019	9.25582
NCU00029	23.632	20.1073	30.5135	30.5219	32.7349
NCU00030	32.4755	22.1618	22.7681	19.137	39.8452
NCU00032	20.9518	16.8843	32.5416	30.3545	25.4619
NCU00033	5.51013	6.73298	9.45983	9.03046	7.55478
NCU00034	38.5312	17.9231	51.4248	44.025	52.3478
NCU00035	19.6625	11.5606	27.2886	23.5807	39.6549
NCU00037	11.9407	15.0583	18.5004	16.537	11.9292
NCU00038	5.63741	8.79878	4.70011	3.62379	10.4803
NCU00040	52.0562	137.29	57.0385	62.5917	46.8746
NCU00041	170.442	224.904	205.014	212.062	146.546
NCU00042	34.1478	23.1443	25.5254	25.0753	29.5954
NCU00043	137.199	195.174	203.611	169.297	120.069
NCU00045	10.5882	5.38421	6.71971	4.38064	11.9856
NCU00046	47.7918	46.9614	73.2254	69.5586	49.4504
NCU00050	23.3436	67.2069	26.4222	27.6587	26.7006
NCU00051	13.0284	17.3612	11.0714	12.6541	12.6445
NCU00052	3.03683	1.23299	2.87098	2.38486	3.07436
NCU00054	8.82719	7.46006	10.8642	14.6715	12.7772
NCU00055	10.5138	5.88885	7.8518	11.9784	20.326
NCU00056	30.7678	18.289	34.2807	29.196	39.0054
NCU00057	14.7202	11.2972	13.3856	11.9962	22.7054
NCU00059	0.410996	2.79084	0.405993	0.411211	0.69505
NCU00060	31.8343	18.455	44.3492	28.6012	30.0958
NCU00061	25.4907	18.2384	23.6411	15.0418	7.26628
NCU00064	65.2723	73.0356	72.6564	96.451	66.6254
NCU00065	5.13877	16.6149	4.18801	4.64127	6.40857
NCU00066	21.2657	23.9051	26.0606	20.3393	20.6654
NCU00067	92.539	106.344	118.021	90.8927	63.1384
NCU00068	35.8503	46.1885	50.6337	67.4493	42.6991
NCU00069	5.471	6.43456	4.97205	6.84232	6.01811
NCU00070	13.4522	15.5888	20.0024	15.717	13.1307
NCU00072	54.6716	24.644	50.4362	44.5595	56.7038
NCU00073	35.6754	44.4299	43.6719	39.2076	28.6975
NCU00074	30.0022	28.6512	19.9394	26.0085	27.4306
NCU00075	38.7017	44.8378	48.6639	44.4364	61.1172
NCU00076	17.4972	10.0477	22.9679	26.4047	22.0662
NCU00077	18.1528	17.1828	27.2765	18.4394	14.0533
NCU00078	54.9906	41.6142	93.4277	60.0541	36.1097
NCU00080	113.015	29.1091	144.436	89.905	146.539
NCU00081	7.39388	6.06061	10.6134	6.60195	6.04427
NCU00083	72.894	97.1552	151.293	168.254	110.297
NCU00084	8.7453	2.8168	5.40741	5.11362	7.11295
NCU00085	5.15401	7.00727	6.45903	6.15149	6.37492
NCU00087	42.2607	53.3615	20.4	19.5705	39.244
NCU00088	10.2523	13.9169	4.80053	3.39541	9.92006
NCU00089	4.43856	3.90044	1.89412	2.41565	5.07142
NCU00090	173.58	153.725	324.194	203.496	181.389
NCU00091	13.6468	10.5975	18.2006	15.8574	15.1682
NCU00092	3.17231	9.11407	5.34964	5.45476	4.10933
NCU00095	31.6698	38.2739	43.5488	36.6516	31.347
NCU00097	4.60133	1.59985	4.07657	6.21831	19.9367
NCU00100	32.5149	29.583	35.8834	34.4212	33.7834
NCU00101	44.9641	31.0669	48.9836	44.1699	38.416
NCU00102	61.2188	236.659	69.8763	104.883	86.4553
NCU00103	15.1963	27.8811	15.1563	12.2294	16.8816
NCU00104	57.7453	76.8404	65.6972	61.425	56.9972
NCU00105	2.36489	11.6011	1.57473	1.26299	3.81208
NCU00106	8.4937	61.1733	11.3009	8.24341	9.84415
NCU00107	15.5447	15.0791	17.0637	14.7259	22.5164
NCU00108	17.8196	7.33488	15.1519	10.2978	17.8177
NCU00109	8.61441	10.2361	12.6845	10.1182	10.6911
NCU00110	1.07317	2.32965	3.03763	1.49507	0.740087
NCU00111	67.7487	68.335	84.3887	72.9161	64.0319
NCU00112	38.3861	24.1804	30.9153	44.8514	61.315
NCU00114	18.5458	25.2258	18.1455	12.9038	26.224
NCU00115	8.25367	17.2082	5.23808	2.41643	8.61112
NCU00116	68.7896	68.8544	95.3946	87.4809	77.4909
NCU00117	38.833	31.1999	62.4222	51.6612	38.7725
NCU00119	23.223	14.9423	32.9409	25.7137	25.1056
NCU00120	18.3447	7.26568	17.09	16.915	15.548
NCU00121	22.3167	18.5744	23.8959	29.21	39.3668
NCU00122	150.206	140.985	94.7037	122.04	147.17
NCU00124	29.7902	21.5097	23.9259	24.6976	40.923
NCU00125	9.37079	6.23973	15.1262	6.97459	9.28069
NCU00126	13.1769	13.0448	21.8191	21.7067	19.3298
NCU00127	101.158	51.3411	149.837	123.566	130.115
NCU00128	2.69928	0.943419	3.75965	3.19408	2.06554
NCU00129	41.8266	9.38154	44.8658	43.2571	29.7128
NCU00130	5277.13	97.1712	396.371	51.5505	29.6437
NCU00132	60.6088	20.4728	41.6288	36.358	44.8165
NCU00133	59.6819	47.6189	62.1037	36.5101	45.4571
NCU00134	19.0791	24.1721	21.9036	18.6173	19.3877
NCU00135	32.8358	23.1936	38.7752	47.1968	70.4987
NCU00136	4.56212	7.37227	4.31707	4.20438	8.08437
NCU00137	44.3558	34.6985	38.6481	28.1863	59.5599
NCU00138	29.1332	9.02552	27.1611	14.8335	15.1353
NCU00142	15.0143	19.8491	20.1869	22.8471	12.203
NCU00144	16.6634	6.75979	11.8281	12.78	15.1616
NCU00145	33.3466	52.4848	62.9881	32.3203	27.4602
NCU00146	28.3681	15.6513	31.3522	19.739	27.1235
NCU00147	34.7673	53.896	66.6688	57.3615	54.2287
NCU00148	23.7416	15.5746	21.2453	19.2472	28.1064
NCU00150	29.2044	40.4294	28.105	25.7707	34.0896
NCU00151	2.03443	5.56394	1.51083	2.17091	3.26647
NCU00152	54.1129	25.5704	55.0945	40.5906	42.2335
NCU00153	1.08434	1.50066	0.861954	0.587618	1.02939
NCU00154	70.8481	32.1976	53.0262	46.0586	49.2345
NCU00155	28.8736	27.7426	34.4323	45.5885	34.9995
NCU00157	54.3985	62.2716	69.1376	68.0505	55.7022
NCU00158	7.25716	9.33391	9.59309	7.70622	9.41926
NCU00159	10.0279	8.92376	15.4733	15.6437	13.3099
NCU00160	322.745	263.391	328.513	325.123	405.638
NCU00161	5.18871	2.44666	4.5155	3.99503	7.03589
NCU00162	48.6038	18.6778	34.2749	20.7438	26.2535
NCU00163	19.2028	9.12363	17.2944	15.5333	18.783
NCU00164	23.2703	19.4939	26.5913	22.7668	21.8439
NCU00166	7.42292	15.4399	10.4437	15.0356	5.83584
NCU00167	14.8276	17.0282	18.7287	23.2312	17.7529
NCU00168	11.5337	23.0914	10.2193	19.1097	18.6529
NCU00169	133.667	68.6963	113.115	61.5206	62.1219
NCU00170	14.7338	28.426	13.6647	15.169	18.4297
NCU00171	43.5768	36.4072	61.0207	60.1338	84.1959
NCU00172	20.8189	25.1394	25.5429	30.7477	29.477
NCU00173	179.038	176.417	165.13	189.093	136.503
NCU00175	22.9253	28.3712	171.399	168.474	95.7049
NCU00177	8.88698	67.6921	2.39244	3.46217	4.58432
NCU00178	9.15129	8.18485	9.05561	8.40583	8.94677
NCU00180	8.90519	7.68843	10.9848	16.9132	16.7525
NCU00181	12.6013	8.1081	11.2987	8.29649	11.848
NCU00182	65.7886	40.7816	75.5375	58.1272	73.4213
NCU00183	19.3286	14.1303	20.454	19.1048	20.4456
NCU00184	20.902	8.88694	19.5061	12.1213	17.4501
NCU00185	1.84344	0.769702	2.90229	3.45465	2.45122
NCU00186	6.64919	4.13741	5.58566	5.41045	8.62462
NCU00187	1.14246	21.7152	1.77335	2.09956	2.10772
NCU00188	38.2295	19.3304	59.7376	53.2537	30.0836
NCU00193	25.9739	31.1722	24.5937	22.4934	24.7081
NCU00194	28.9313	28.4441	26.564	24.4463	46.6835
NCU00195	29.7029	52.1136	34.7418	55.3949	34.4741
NCU00196	23.4806	19.5862	28.0068	31.884	16.8976
NCU00198	80.5626	37.0631	50.6554	55.6729	89.4352
NCU00199	22.2795	28.9998	24.397	17.6267	14.9282
NCU00200	36.1389	37.1859	38.0201	35.0485	27.4257
NCU00201	1.91002	1.39807	1.63775	2.65834	1.48859
NCU00202	58.0387	139.058	86.7691	74.1653	44.7643
NCU00204	1.22744	2.10872	1.62982	1.16534	1.01482
NCU00205	5.85276	9.03258	7.27741	6.92936	4.27654
NCU00206	866.198	1.0518	4.75601	2.68792	2.55081
NCU00207	27.5767	9.25092	19.6212	19.5336	21.8751
NCU00209	31.7734	17.7743	32.0151	23.859	32.7798
NCU00210	38.6254	50.4501	67.0233	46.4344	49.0581
NCU00211	20.9242	31.3047	22.2457	17.3222	26.6046
NCU00212	794.323	708.708	1370.23	580.729	509.73
NCU00213	12.935	9.8535	18.7716	15.8471	14.8536
NCU00214	28.8487	14.6954	24.1239	13.3868	20.4515
NCU00215	26.0783	23.1942	21.8672	16.0316	25.6638
NCU00216	109.187	96.4572	112.224	82.2448	99.4119
NCU00218	19.034	12.8877	16.1811	18.6239	20.5845
NCU00219	20.6911	28.9628	28.1823	29.5381	21.8527
NCU00220	16.4771	13.4486	14.5159	11.692	23.6488
NCU00222	23.145	56.8394	50.9886	39.1683	20.9934
NCU00223	56.5713	75.6514	73.1275	88.6737	109.116
NCU00225	69.6905	271.974	34.364	59.8169	84.1533
NCU00226	44.0442	19.7233	83.148	64.7502	54.3469
NCU00227	6.42704	30.7926	8.01868	8.54466	8.16289
NCU00229	3.06098	1.19674	2.25624	1.77009	3.18002
NCU00230	21.7908	34.3189	35.0033	31.2575	34.3522
NCU00232	3.73228	8.17052	3.33188	2.55134	4.69168
NCU00233	2.41396	1.20983	2.56454	1.64842	2.09589
NCU00234	38.5772	21.5382	50.7535	43.6391	45.7139
NCU00236	24.3165	55.4183	31.5097	166.673	65.9537
NCU00237	19.5255	15.6882	26.8898	21.1158	22.6856
NCU00238	0.717251	0.907241	0.480538	0.667141	1.11476
NCU00239	27.7015	17.1389	32.7862	30.9536	27.158
NCU00240	24.9323	16.7138	23.1138	22.2014	23.9827
NCU00241	25.5727	30.8775	24.6229	18.6526	26.7675
NCU00242	73.4107	40.1602	66.1717	60.2377	83.0564
NCU00243	63.4401	87.1959	67.6293	64.6603	68.8038
NCU00244	7.76617	6.41737	9.10859	8.75681	20.7371
NCU00245	18.6519	5.59182	22.3747	9.47894	28.7612
NCU00246	5.97749	1.19713	6.76878	2.36733	8.10052
NCU00247	10.3378	40.8066	18.2152	10.1649	18.6292
NCU00248	11.9858	102.573	16.9297	37.182	44.848
NCU00249	8.85904	17.9805	14.0884	14.8869	10.2826
NCU00250	12.0826	1.97555	26.8221	20.3646	20.0681
NCU00251	9.94964	4.00814	9.33709	9.39948	9.14505
NCU00252	8.29871	4.21874	9.02311	4.26392	4.82912
NCU00253	32.1678	15.9108	31.8957	26.103	42.4376
NCU00257	4.60579	7.15891	8.46691	5.00579	3.64503
NCU00258	39.607	192.016	8.95855	18.9326	52.1998
NCU00259	7.54384	24.0388	8.16855	9.78505	7.87806
NCU00260	47.5366	322.145	47.4259	81.619	43.4091
NCU00261	15.3229	46.8017	12.9249	16.1863	20.7758
NCU00262	15.3466	11.2953	19.4227	16.3694	15.7524
NCU00263	27.6743	61.5048	41.0538	101.559	50.7826
NCU00264	18.9328	10.5086	30.4757	32.146	33.6898
NCU00265	3.73978	91.2307	3.0273	16.8072	3.36609
NCU00268	16.143	6.35868	23.8199	20.448	25.5665
NCU00269	7.48739	6.37381	5.4181	6.23417	7.25598
NCU00270	15.4629	76.8888	25.8901	42.0743	17.9452
NCU00272	32.3511	30.1434	42.1698	39.8128	40.0051
NCU00273	21.8333	31.8799	28.6438	19.0738	16.9735
NCU00274	9.60574	12.3339	13.8371	11.5976	8.99986
NCU00275	9.53658	9.17472	13.2056	11.941	13.5391
NCU00276	2.87561	5.98209	2.49173	2.94536	3.17343
NCU00277	13.4482	10.2868	10.2893	8.87895	11.7102
NCU00278	28.3794	40.4483	33.2816	34.0673	52.1186
NCU00279	4.41861	3.53227	5.85166	3.91558	3.12992
NCU00280	18.4085	10.7527	20.408	18.6865	18.8502
NCU00281	12.1312	7.43342	23.6327	13.4395	12.8893
NCU00282	24.5022	14.1705	27.7932	23.3818	40.3521
NCU00283	7.17871	14.7861	4.72517	6.24848	7.49026
NCU00284	3.52127	0.962065	3.61643	2.37891	3.55712
NCU00285	13.0692	4.53643	12.6091	7.93334	17.8066
NCU00287	12.6123	9.48129	14.1792	11.7154	17.1678
NCU00289	28.8138	38.3217	26.5187	32.2899	81.0854
NCU00290	7.96064	26.7733	42.1621	50.6764	6.10369
NCU00291	38.5508	30.9831	32.0104	24.3339	22.7035
NCU00292	611.355	373.716	117.16	221.48	9.05218
NCU00293	20.1518	21.7929	12.3951	12.6402	24.6728
NCU00294	324.185	920.834	299.84	414.68	414.12
NCU00295	80.5512	69.2422	93.5512	80.9215	68.3757
NCU00296	2.91092	0.610835	1.14807	0.411933	0.830844
NCU00298	3.17921	1.39135	4.13911	4.00164	4.41166
NCU00299	40.0688	43.163	45.1426	59.919	40.6491
NCU00300	8.80149	4.07859	4.81683	4.5648	7.95783
NCU00301	6.34301	19.5812	3.83031	4.55705	10.3008
NCU00302	24.244	12.8716	19.1334	17.7039	38.1043
NCU00303	35.7639	52.0228	21.1828	27.4185	39.0808
NCU00304	187.073	193.355	285.108	339.875	180.585
NCU00305	39.3264	22.3913	24.829	28.9473	29.9256
NCU00306	1.86947	6.89459	2.65482	1.94326	4.38492
NCU00308	4.07516	2.8405	3.11247	2.70399	3.78785
NCU00309	14.7629	227.221	23.5804	21.5721	5.49821
NCU00310	4.42539	3.14337	4.3162	3.91002	4.59007
NCU00311	88.7125	89.0285	106.458	104.165	68.8471
NCU00315	83.3752	237.744	22.2017	53.9645	114.464
NCU00316	18.1984	18.5015	25.9501	44.3832	47.1549
NCU00317	8.22441	7.53624	11.5247	10.6183	11.5515
NCU00319	2.80127	1.80236	1.34935	1.63379	1.60323
NCU00320	16.8047	16.1087	19.2262	18.1005	13.5512
NCU00321	45.9835	77.9794	52.9043	74.2599	28.8943
NCU00322	42.5098	14.3715	95.0414	36.6999	97.9273
NCU00324	21.3744	20.4052	33.972	28.1459	25.2095
NCU00325	10.4596	11.0912	18.7614	12.5703	11.9428
NCU00326	173.94	70.9207	85.8977	62.1796	50.5297
NCU00329	1.38457	1.43551	1.87444	1.65955	1.61374
NCU00330	11.7291	3.76379	5.99028	5.96803	12.7877
NCU00331	3.27028	2.74565	3.1842	3.10108	2.4791
NCU00332	52.3229	13.4486	92.4537	46.5778	69.9285
NCU00333	8.78163	8.6763	11.1818	5.52079	7.1419
NCU00334	15.3165	16.0098	15.7909	11.6354	17.474
NCU00335	35.0783	29.3582	34.0485	32.2094	40.9268
NCU00336	0.403776	6.9083	0.311111	0.473908	0.701378
NCU00337	0.353641	4.54025	0.238946	0.232709	0.933209
NCU00338	8.39083	2.45577	5.93082	4.79702	6.54104
NCU00340	66.9343	149.586	102.326	123.275	65.1912
NCU00344	18.2306	18.3368	25.0691	23.0032	22.1834
NCU00345	19.6516	9.09022	19.0354	17.1851	20.9359
NCU00346	46.0922	29.7985	33.9826	35.4286	54.8371
NCU00347	45.5953	26.4059	39.6844	44.322	57.8383
NCU00348	23.4261	19.8516	21.2605	15.6431	33.2107
NCU00349	17.5437	15.7419	23.3497	20.4985	23.8479
NCU00350	64.1712	45.4587	49.6593	46.2959	75.062
NCU00351	27.3805	13.8898	26.1601	15.9312	19.8249
NCU00352	37.1322	25.5244	31.7752	29.0844	31.0797
NCU00355	16.9765	365.968	146.245	176.074	21.8295
NCU00356	14.546	9.42781	18.6019	16.2752	19.4
NCU00357	14.5635	35.7764	14.9539	21.0478	28.6132
NCU00358	3.64196	7.4141	4.80556	5.32566	4.33237
NCU00359	5.01007	11.5767	5.18101	6.78755	4.6312
NCU00360	8.56918	11.4191	9.90309	9.70376	17.2489
NCU00362	13.1213	4.8837	17.3068	13.5965	11.8279
NCU00363	2.55479	0.4779	3.42404	1.57854	3.14289
NCU00364	19.9137	12.4599	15.1894	12.8419	23.1333
NCU00365	39.8138	30.2872	29.0795	19.2579	46.8549
NCU00366	63.8296	174.906	85.9487	111.144	102.265
NCU00368	17.8584	5.99762	19.7142	20.5938	16.5642
NCU00369	31.8156	18.8689	24.3917	23.6394	27.1248
NCU00370	6.95471	2.02311	6.04677	4.07213	5.26341
NCU00371	11.4082	19.1778	8.98042	8.50306	17.907
NCU00372	4.11364	8.54286	3.99118	5.20596	4.47438
NCU00373	135.529	65.3609	90.0147	101.669	182.008
NCU00375	6.70738	2.85373	9.92234	6.28618	13.7636
NCU00376	26.896	31.1667	28.9604	36.3094	26.5322
NCU00377	39.7693	16.2984	31.5286	29.2907	39.4823
NCU00378	308.757	215.659	260.56	282.406	338.226
NCU00379	64.423	50.8125	51.146	43.0983	36.839
NCU00382	29.5818	43.7674	30.5505	31.7572	41.0357
NCU00385	262.689	414.876	319.882	291.463	416.455
NCU00386	1.34045	2.47728	1.98857	3.06345	2.61876
NCU00387	3.10984	1.29679	2.32829	2.00516	3.28674
NCU00388	62.1479	49.8404	66.4336	57.8148	65.5531
NCU00389	24.5303	35.221	13.3854	11.452	23.5678
NCU00392	12.4793	21.221	16.174	19.6708	11.3346
NCU00395	26.5715	30.5569	20.5123	23.4592	31.3959
NCU00396	24.8257	33.1785	29.9547	20.9562	24.3736
NCU00397	89.0617	88.9652	111.124	118.462	169.449
NCU00398	33.4011	27.4463	43.9355	41.8316	40.3526
NCU00399	3.58202	1.74683	3.81509	3.95216	26.7206
NCU00400	8.35136	3.11131	7.97128	7.55116	9.48028
NCU00401	16.128	24.7738	24.7079	27.7006	18.1562
NCU00403	16.8313	16.8543	15.6634	17.2415	12.9717
NCU00404	7.43617	20.5537	4.21287	4.83286	8.16374
NCU00405	20.6503	57.3082	8.77672	10.4356	13.2906
NCU00406	52.4286	76.0848	51.9024	60.7386	44.3303
NCU00407	12.3738	14.9147	17.5523	14.5968	10.7212
NCU00408	12.0342	12.3642	10.6443	7.48407	5.92275
NCU00409	1.80731	10.8741	1.49618	1.37141	2.84215
NCU00410	39.5863	74.966	31.4278	26.8044	42.5356
NCU00411	20.4958	15.0665	22.2636	14.9555	23.1048
NCU00412	19.6236	23.7139	31.4494	14.745	15.9479
NCU00413	110.494	555.047	31.8649	63.4931	161.324
NCU00414	134.444	230.721	183.359	177.57	159.594
NCU00415	14.9945	28.3634	15.9944	13.2436	16.8999
NCU00416	17.4214	5.04556	12.1489	8.31872	20.3118
NCU00417	39.2109	34.8491	46.7625	40.5622	46.8188
NCU00418	412.316	347.316	390.83	400.79	433.895
NCU00419	3.31969	10.9344	1.35485	0.586436	3.1
NCU00420	40.4503	46.5787	60.1948	45.7041	55.2221
NCU00421	21.1155	18.529	33.1305	20.8642	18.6491
NCU00422	228.818	164.772	193.138	204.492	231.142
NCU00423	27.3069	18.834	32.2569	26.6134	30.3598
NCU00424	29.4441	28.9366	42.1905	27.6299	21.2327
NCU00426	6.7221	10.5699	7.36186	6.10982	7.25255
NCU00427	5.61532	6.49485	4.34388	2.96828	5.8832
NCU00428	8.88518	13.7565	14.5564	8.3375	7.50256
NCU00430	38.9379	75.5348	54.7331	46.2246	113.384
NCU00431	31.7251	62.093	25.6783	25.9635	46.0208
NCU00432	14.8408	28.829	27.3851	28.934	12.6833
NCU00434	50.5775	28.2515	67.6498	60.7982	62.4543
NCU00435	66.4848	36.0774	64.6605	50.3149	79.0756
NCU00436	23.4095	31.9098	24.3988	21.6725	28.0819
NCU00437	1.81449	0.983624	1.07032	0.82127	1.45725
NCU00438	8.66435	6.0995	8.16305	11.2255	10.6251
NCU00440	90.2321	143.83	104.774	124.882	65.6592
NCU00441	18.2885	20.004	19.0723	24.7418	20.4316
NCU00442	50.3694	31.8625	52.223	54.9044	43.2602
NCU00443	357.21	335.508	354.123	401.907	387.252
NCU00444	39.9264	48.982	61.9372	48.3311	36.3354
NCU00445	23.758	12.4485	23.9922	33.4347	27.59
NCU00446	8.99422	7.18899	10.2626	28.6638	15.0938
NCU00447	30.3554	60.5265	39.0981	44.8076	71.0758
NCU00448	12.0364	9.28098	19.3635	13.6206	9.15179
NCU00449	64.4374	3.03783	1.88354	1.08181	0.720187
NCU00450	81.4118	37.7383	92.2084	114.737	135.95
NCU00451	10.2933	5.51929	11.0119	11.8534	13.8448
NCU00453	43.9973	21.876	39.0443	26.121	41.3899
NCU00454	32.1162	23.736	50.2084	44.3523	42.4864
NCU00455	33.634	32.277	42.5867	36.1239	36.0081
NCU00456	36.2162	54.5813	35.5232	45.7933	60.8651
NCU00457	28.3801	121.235	17.3117	25.2976	26.1561
NCU00458	34.9752	26.052	34.9901	42.6399	37.7144
NCU00459	4.4472	5.43975	5.82443	5.02476	4.63712
NCU00461	114.251	148.215	99.5933	1175.03	314.529
NCU00463	21.6284	19.5118	19.3572	32.6351	20.9188
NCU00464	103.409	861.094	29.8978	86.3984	147.084
NCU00465	42.8844	68.0052	32.9021	33.4727	64.852
NCU00466	13.493	9.94822	12.7774	14.3036	17.3491
NCU00467	44.3955	34.8378	48.8703	39.9686	49.2306
NCU00468	15.1153	19.9862	8.32112	8.00198	16.1351
NCU00470	5.51915	4.27312	5.98668	7.05106	6.55658
NCU00471	4.81694	3.27981	5.32338	9.77822	10.7748
NCU00472	52.9514	63.184	67.6592	64.2802	42.2245
NCU00473	3.79271	2.6308	2.84737	3.4663	6.54599
NCU00475	186.544	1166.8	143.73	275.816	281.432
NCU00476	11.3525	21.9579	10.695	12.3225	12.0594
NCU00477	544.795	248.856	721.339	683.178	786.449
NCU00478	5.82353	6.88665	10.1669	6.84453	6.75183
NCU00480	27.745	28.9407	25.8606	24.4609	31.7263
NCU00481	54.6489	36.5062	55.5871	47.8958	43.0924
NCU00483	6.82969	9.96945	6.88248	6.31823	6.99214
NCU00484	134.842	166.488	175.848	169.518	159.909
NCU00486	46.2427	53.1354	67.9819	62.0119	53.0391
NCU00487	3.98379	6.28106	2.90658	2.36918	3.43855
NCU00488	93.5467	114.561	132.676	111.88	97.59
NCU00489	68.4734	291.638	12.2698	25.1521	83.1626
NCU00490	29.4398	38.3636	39.2802	39.1719	24.5251
NCU00492	35.0404	25.6691	36.502	41.6582	43.5335
NCU00493	123.867	106.027	131.146	105.139	123.146
NCU00494	25.4045	12.3516	24.4334	24.2585	27.7926
NCU00495	13.9136	11.7833	14.6184	15.2462	20.3548
NCU00496	6.80537	1.58213	3.55847	3.51973	6.14843
NCU00497	21.255	14.3866	27.8672	20.321	16.481
NCU00498	21.8896	15.5337	27.7704	28.1434	17.5149
NCU00499	375.068	230.084	627.556	568.909	479.569
NCU00500	6.34925	1.22258	6.15541	3.83809	4.68106
NCU00501	5.8037	10.909	5.58636	3.68036	7.40337
NCU00502	226.052	252.673	244.77	204.149	282.652
NCU00503	15.8169	10.3447	21.0844	12.781	14.243
NCU00504	4.75203	5.20651	3.73088	3.11967	5.24017
NCU00505	52.4986	66.9006	60.7093	43.1287	63.1549
NCU00506	109.146	69.2663	83.8496	81.1857	68.305
NCU00509	17.7645	5.84014	12.6114	10.9894	9.94797
NCU00512	5.30656	2.52525	6.67477	6.05809	4.4848
NCU00513	54.7711	48.1147	60.5041	57.4065	75.9966
NCU00515	21.8577	16.7621	33.7158	36.6389	30.2834
NCU00517	26.9187	19.5106	28.9016	19.8811	26.6878
NCU00518	42.2487	35.5397	42.4295	45.1914	55.3902
NCU00519	98.061	85.5654	94.7543	80.6683	123.402
NCU00520	6.7674	27.7714	3.56118	6.38153	20.8792
NCU00521	45.1913	63.6647	53.6599	52.3457	108.501
NCU00522	24.0789	50.3741	38.426	68.3876	78.1782
NCU00523	19.462	12.8361	18.5397	22.3682	21.0489
NCU00524	2.34751	1.28275	3.2569	4.69604	3.03902
NCU00527	24.1588	13.0137	23.1149	21.5086	35.7621
NCU00528	22.5809	24.2366	34.0826	25.7579	24.7086
NCU00535	11.8221	4.91895	9.10898	9.72421	13.5969
NCU00536	7.63336	31.3296	12.4673	18.0775	17.5701
NCU00537	65.2877	38.5419	107.81	131.491	126.986
NCU00538	13.4031	11.8935	14.0055	12.5932	15.02
NCU00541	73.0018	74.6457	64.9616	76.0115	131.471
NCU00542	19.0845	18.3335	17.5341	19.0496	28.2656
NCU00545	21.62	30.0532	28.5869	35.4439	17.0732
NCU00548	2.43946	1.40748	2.16879	2.25299	3.3321
NCU00549	82.6261	62.3699	103.954	95.6025	95.7728
NCU00550	12.9292	17.316	19.9746	21.6127	17.0491
NCU00551	47.6959	36.2337	63.299	58.464	49.7623
NCU00552	100.305	105.018	125.135	209.668	416.827
NCU00553	29.1287	44.5934	45.6235	58.3196	47.0643
NCU00554	20.3524	45.9827	7.76265	9.24941	8.44889
NCU00556	29.1448	58.3376	39.398	50.5392	42.411
NCU00558	4.6923	4.5676	3.90101	4.65112	16.4008
NCU00559	27.3441	14.6924	68.1864	33.8461	18.2652
NCU00560	19.7167	17.0461	33.4065	24.6332	21.9411
NCU00561	22.6042	4.35261	22.833	16.7455	49.3283
NCU00562	51.8351	51.9324	90.538	74.6093	74.466
NCU00563	1.57185	0.870576	1.71772	1.18326	2.04057
NCU00564	89.18	78.6967	85.9123	90.2134	117.36
NCU00565	10.0678	17.6432	10.0915	18.3401	43.0772
NCU00566	138.561	99.9908	127.925	149.982	218.238
NCU00567	7.76096	93.2883	4.6054	6.24358	3.98311
NCU00568	15.1828	9.28891	16.2335	12.8694	19.4603
NCU00569	13.2686	10.3074	16.1432	14.5521	16.7854
NCU00570	10.7292	20.768	19.8932	24.6036	14.8193
NCU00571	54.2827	62.4855	58.4444	57.8953	73.0283
NCU00572	5.87377	2.16635	4.9168	6.74616	8.91699
NCU00573	140.722	148.563	137.757	140.082	241.971
NCU00575	161.797	93.7684	80.4741	83.195	96.8623
NCU00576	15.2916	29.2393	24.6227	31.9079	29.8149
NCU00577	13.547	13.8967	16.4031	16.6939	20.8569
NCU00578	20.5426	18.6147	20.5091	16.7553	19.6522
NCU00579	40.5186	28.0977	58.8753	57.4601	48.83
NCU00580	11.2803	5.60818	9.65485	14.8027	25.9258
NCU00581	13.7806	9.64185	13.2605	11.0427	22.9016
NCU00582	17.9523	74.8828	32.0612	51.2546	103.107
NCU00584	19.9084	33.5067	29.5144	29.3861	57.5924
NCU00585	81.8407	69.5473	109.142	85.0174	211.475
NCU00586	18.4929	3.2413	74.4514	32.1789	48.9835
NCU00587	40.9534	32.0821	47.3921	43.4678	51.6802
NCU00589	46.8613	37.3215	42.5578	36.5358	90.3927
NCU00590	35.7626	31.4127	74.4721	66.859	40.3816
NCU00591	84.637	14.8484	164.627	248.479	221.413
NCU00592	9.95846	11.872	12.8405	11.8774	18.0424
NCU00593	38.1674	44.7386	47.3275	40.4034	41.4588
NCU00595	31.9313	41.7047	34.9373	40.3263	70.3796
NCU00596	17.5619	6.86496	8.77766	9.034	30.997
NCU00597	0.807194	3.46819	0.894571	0.505869	2.19071
NCU00598	61.3016	20.6217	57.4426	37.7018	50.289
NCU00599	6.00776	7.60794	5.7385	5.22224	6.0516
NCU00600	198.299	165.767	195.56	204.569	207.274
NCU00602	10.2821	21.1378	5.95155	4.43619	10.0063
NCU00604	5.33826	6.24181	7.49893	5.21081	5.39296
NCU00605	4.8222	9.0609	3.60058	3.21917	4.51909
NCU00606	3.82968	3.69914	4.86158	2.39279	4.1001
NCU00608	34.6482	39.8305	59.0326	62.6688	48.7626
NCU00609	13.3623	18.6914	18.1457	12.8014	20.4248
NCU00611	21.5924	27.1058	31.3478	22.7459	20.2746
NCU00614	30.1399	29.4757	40.9403	35.9908	39.4225
NCU00616	10.8073	6.531	12.7519	11.4036	15.0658
NCU00617	31.7135	42.1922	41.4403	37.7558	24.7531
NCU00618	214.417	493.133	92.5956	133.963	266.548
NCU00619	29.0035	22.5026	38.5426	38.1936	39.3095
NCU00620	14.672	11.7471	15.1456	10.4422	14.5182
NCU00621	23.152	20.2952	29.9122	26.1455	23.2453
NCU00622	19.8274	33.6769	32.7427	28.2845	21.8976
NCU00623	30.0777	26.3139	23.3502	21.5418	42.6429
NCU00624	30.3436	29.4332	33.6719	23.7348	42.4203
NCU00627	251.231	163.742	186.971	188.847	376.151
NCU00628	11.2549	8.42436	17.4779	11.6706	10.7583
NCU00629	42.4332	38.1142	29.9721	28.8579	50.3329
NCU00630	6.85944	5.30918	9.19969	8.49612	8.66549
NCU00631	20.1688	10.8727	26.1576	16.2358	18.9774
NCU00632	26.7045	25.5124	35.1852	33.4994	32.6126
NCU00633	33.037	10.5711	10.5522	6.47159	18.6848
NCU00634	90.7047	392.886	31.3362	69.4391	115.522
NCU00635	134.38	463.429	160.708	202.148	168.073
NCU00636	131.713	187.848	154.789	163.473	150.383
NCU00638	5.19271	1.74222	3.87774	5.34754	2.29497
NCU00640	17.411	11.9652	14.0491	8.87098	19.6434
NCU00641	19.7893	11.4601	16.6468	6.66795	16.1713
NCU00642	20.3826	160.06	17.9558	177.637	22.3493
NCU00643	22.397	471.967	15.9664	247.708	17.18
NCU00644	33.5846	110.891	35.273	36.9637	55.4557
NCU00646	9.40606	6.00712	8.15198	6.77612	6.12386
NCU00648	5.02175	1.34447	6.10703	7.39883	4.991
NCU00649	35.1267	38.7726	35.8252	30.1855	31.0644
NCU00650	1.69359	9.25313	1.35093	1.44465	2.25202
NCU00651	21.2163	21.0919	24.8101	20.195	30.5623
NCU00652	6.47145	3.3825	5.56511	6.62816	7.02172
NCU00653	4.03413	1.22194	3.52555	2.70758	3.43334
NCU00654	20.0458	17.9238	24.7948	27.8266	20.5418
NCU00655	64.3184	35.0651	56.3522	51.8076	79.2618
NCU00656	24.1473	16.5082	29.8753	28.6125	26.1754
NCU00657	16.0311	25.7677	30.4018	16.1627	10.6907
NCU00658	2.02748	0.796707	2.76054	2.65487	1.48726
NCU00659	14.7544	2.05083	14.972	9.95785	20.0313
NCU00660	24.3051	19.1142	33.6538	25.5203	34.0209
NCU00662	4.16236	4.20801	6.39498	4.98923	5.15296
NCU00663	53.5452	40.706	87.2298	72.5289	60.0496
NCU00664	6.54316	3.45367	5.60941	5.20669	9.04202
NCU00666	24.9375	2.58978	10.416	11.4047	15.2327
NCU00667	86.5706	39.7772	61.4081	55.1826	131.499
NCU00668	35.9361	38.5272	51.6442	50.489	38.0336
NCU00669	92.0742	66.9356	110.734	64.5269	43.9777
NCU00670	338.528	269.134	328.613	314.485	362.847
NCU00671	19.6488	20.1102	25.7756	21.5036	17.9038
NCU00673	1445.09	582.051	2093.65	2048.72	1599.31
NCU00674	1.32584	2.59336	2.61671	2.44347	2.14328
NCU00675	9.39275	10.5492	10.0664	7.31541	6.05428
NCU00676	5.16785	5.72341	3.83506	3.05587	7.15698
NCU00677	28.7612	10.4819	42.7125	46.053	37.5994
NCU00678	12.1665	4.67117	13.3307	9.87576	13.3018
NCU00679	1.43121	0.326674	1.76925	1.2982	1.43626
NCU00680	45.7264	55.6867	101.219	150.151	86.8152
NCU00681	23.6461	12.0224	22.866	21.5992	20.1755
NCU00682	38.1845	59.1052	55.3676	78.6123	98.5334
NCU00684	14.0654	34.1785	13.1032	11.7654	31.698
NCU00685	250.162	288.257	279.976	202.488	307.67
NCU00687	54.2302	108.697	104.126	108.954	70.4786
NCU00688	4.51655	3.13152	3.86801	3.42459	4.06648
NCU00689	18.3719	18.8794	25.3307	26.5963	20.6704
NCU00690	9.87624	8.07411	10.7479	7.33793	7.72502
NCU00691	12.3203	10.1227	19.9185	17.2249	9.66119
NCU00692	6.74933	47.6342	6.83746	5.86625	9.2967
NCU00693	12.5104	12.3057	9.11881	7.89048	13.9499
NCU00694	32.8248	37.1767	54.4326	50.5948	46.9908
NCU00696	29.3147	56.3835	37.2652	35.4857	55.6541
NCU00698	1.53616	0.146646	1.53406	0.985417	1.64348
NCU00699	2.9853	2.22761	2.63625	3.4625	35.1665
NCU00700	8.89905	5.29045	8.36789	12.0534	8.3712
NCU00701	3.98961	8.3782	5.44686	7.12922	10.011
NCU00705	5.88614	0.502636	11.1314	2.99622	8.38463
NCU00706	195.307	607.925	80.438	148.697	344.056
NCU00707	2.3184	9.38405	2.32362	2.03412	3.07919
NCU00709	41.2159	228.695	5.58365	60.2352	1.27196
NCU00710	133.109	12.8504	3.36933	4.28538	1.70919
NCU00711	12.7288	21.3889	6.95782	19.1228	7.16285
NCU00712	33.9212	108.257	34.8674	33.9377	30.1945
NCU00713	13.7365	13.079	9.16393	9.33154	19.0465
NCU00714	54.7234	110.599	76.6173	75.2551	51.3158
NCU00715	13.0191	13.6981	11.0847	12.115	11.0475
NCU00716	2.61569	2.9978	1.79014	2.72605	16.1743
NCU00717	1.82824	0.946028	1.15419	1.3595	1.84255
NCU00719	1.93421	0.322622	0.933494	0.862505	5.25197
NCU00720	49.9163	39.3473	72.4637	54.0744	75.7691
NCU00721	24.1806	17.2097	51.9403	88.7017	60.3145
NCU00722	6.68209	9.33041	6.12757	8.52695	6.56894
NCU00723	23.18	4.65008	12.0417	13.2781	13.4293
NCU00725	73.8519	47.8351	76.5418	60.6682	69.7368
NCU00726	1281.22	2209.52	2000.21	2047.95	1544.08
NCU00727	9.42055	13.5227	7.73344	6.89705	9.40299
NCU00728	4.37358	2.51071	4.41372	3.70816	3.896
NCU00729	252.957	749.812	468.358	548.352	69.9071
NCU00730	2.66914	1.34714	2.45793	1.81696	2.82737
NCU00734	29.166	26.5428	33.295	35.5851	43.1858
NCU00735	2.24447	3.37611	2.18599	2.35069	3.64252
NCU00736	1.82937	3.61042	3.302	3.30118	2.21269
NCU00737	25.4744	27.5068	27.8127	26.2917	28.9978
NCU00738	21.7132	13.1972	28.1146	16.2445	18.5419
NCU00740	3.45923	1.97995	6.41853	6.34272	3.90368
NCU00741	15.0598	13.7801	18.7376	15.4246	13.5942
NCU00742	3.12332	1.57059	1.26922	2.01126	3.04541
NCU00743	84.1675	106.444	81.558	84.7149	81.6475
NCU00744	111.12	74.7571	183.329	124.328	210.875
NCU00748	10.52	36.6726	24.4011	32.7619	69.4312
NCU00749	35.9789	22.2914	32.1037	21.4535	46.4699
NCU00751	10.689	4.77188	14.1057	9.32962	15.8312
NCU00752	19.1933	26.403	34.5625	34.3393	25.6743
NCU00753	25.3592	32.9207	36.1841	27.9748	30.488
NCU00754	2.02844	1.04203	1.36531	2.04565	2.17291
NCU00755	5.68046	3.17626	9.91106	5.17377	7.48885
NCU00758	5.95391	5.21652	6.9426	4.63108	5.94904
NCU00759	12.5978	9.05812	13.9809	11.6117	20.9008
NCU00761	1.62247	0.196035	0.479955	0.38244	1.97728
NCU00762	2757.31	1.32261	36.8494	2.85571	1.47109
NCU00763	18.9998	0.0401101	0.583261	0.266629	0.129092
NCU00766	29.4929	15.5353	49.9099	50.3795	65.3776
NCU00768	31.3749	73.1465	24.4483	21.5499	36.2349
NCU00770	27.5567	13.0424	24.3921	23.5232	27.8128
NCU00771	20.3069	22.2593	33.4529	25.9007	19.2736
NCU00772	15.9563	27.4886	21.7855	21.2725	16.9703
NCU00773	3.47809	0.733232	2.97021	1.46223	4.67127
NCU00774	55.4692	41.1857	58.5727	39.2793	84.6238
NCU00775	154.187	88.1114	304.25	93.4085	197.328
NCU00777	1.59267	4.31055	1.02865	0.950426	1.50174
NCU00778	8.33239	9.03105	8.12866	5.92015	7.25165
NCU00780	3.69247	1.76044	4.7979	4.17424	5.35822
NCU00782	33.1541	11.0404	46.4186	46.5351	38.4048
NCU00784	29.299	13.5395	33.0244	31.1192	22.5642
NCU00786	2.57298	0.322969	3.05232	3.10189	1.55919
NCU00787	12.0351	2.19315	7.3795	5.84457	8.17996
NCU00788	2.92002	1.10722	4.26669	3.32425	5.00907
NCU00789	58.7063	37.0381	65.653	61.8561	76.608
NCU00790	8.93935	28.3546	7.16857	8.44046	25.0243
NCU00792	11.8195	73.2071	12.4753	7.79681	11.2096
NCU00793	92.5306	149.253	74.3287	104.393	150.968
NCU00794	2.11791	10.2404	2.11575	2.60375	3.62062
NCU00795	2.70187	0.78658	3.06678	2.681	2.61419
NCU00796	10.5277	4.06986	6.78907	8.59293	8.75786
NCU00799	1.97448	2.79719	1.76769	1.34259	1.49206
NCU00802	21.8566	7.72489	22.2304	19.6213	22.4102
NCU00803	8.93795	1.95744	10.9254	9.50874	17.818
NCU00805	75.1644	53.0813	80.6122	90.6798	102.741
NCU00808	15.6769	10.8288	20.4495	24.9974	12.8529
NCU00810	60.8306	74.3242	90.8974	126.032	33.5609
NCU00811	40.5949	495.37	89.6165	174.171	31.4825
NCU00812	15.8295	19.9488	9.96904	6.89308	20.7097
NCU00813	96.1706	34.7311	81.463	40.692	38.0286
NCU00814	37.9571	27.1706	69.377	40.5078	32.9336
NCU00818	7.94378	1.7947	7.67373	9.31618	7.95579
NCU00821	183.845	148.393	411.73	920.007	277.247
NCU00823	60.8037	54.1217	105.525	78.9562	70.6712
NCU00824	7.68014	4.58926	12.1381	8.04543	6.98855
NCU00825	10.56	3.34463	7.70031	12.0248	25.5057
NCU00826	1.27835	0.466433	1.16274	1.45592	1.41004
NCU00827	16.2694	7.02078	10.0624	10.2588	12.1407
NCU00828	17.0438	8.67047	14.5304	22.8595	32.645
NCU00829	5.91664	1.6654	4.07741	4.33197	7.84257
NCU00830	5.23474	2.48856	6.30379	5.29156	4.00976
NCU00831	72.7489	70.7168	123.921	140.275	157.861
NCU00832	12.4539	13.4488	17.5238	17.6811	18.6546
NCU00833	13.4398	13.8368	21.8953	12.7258	10.662
NCU00834	5.65572	4.3959	6.75541	7.55015	7.11582
NCU00835	27.1613	23.9423	25.7084	29.5323	41.2217
NCU00836	1172.24	2.68951	10.2962	3.83107	2.25896
NCU00837	14.6263	6.50285	9.29208	8.68304	12.7985
NCU00838	31.0963	27.2318	35.5811	23.586	44.488
NCU00843	25.1017	37.5976	19.7559	13.6518	28.6128
NCU00846	4.45611	3.44561	6.72038	2.83212	1.94708
NCU00847	29.8998	42.6273	45.0789	34.7413	38.3745
NCU00848	1.08465	2.90007	2.32373	3.19151	2.23855
NCU00853	7.57945	3.95033	5.46482	5.58564	9.13726
NCU00854	4.77216	3.77265	4.94977	4.57953	5.95006
NCU00855	7.14881	6.07959	8.42726	8.07383	10.9466
NCU00856	19.6986	15.4412	32.0186	24.1478	12.7501
NCU00857	14.9681	8.79965	18.8957	13.3027	13.0613
NCU00859	34.4281	6.97634	55.2925	9.61677	43.819
NCU00860	11.5741	9.14687	12.4364	9.8058	12.7966
NCU00862	2.04228	0.648608	2.52884	2.40466	2.22505
NCU00863	26.8012	7.53745	14.0312	12.9457	21.241
NCU00864	142.977	93.8474	125.593	135.699	190.517
NCU00865	15.6918	34.635	15.4594	22.2486	40.541
NCU00867	19.8954	45.1249	34.5133	33.3544	29.1592
NCU00868	10.8094	14.2487	11.7409	14.9304	25.8059
NCU00869	10.2916	6.39324	8.0907	8.34951	11.2622
NCU00870	1201.62	83.0938	82.511	60.78	22.9351
NCU00871	2.28491	0.16674	0.643273	0.385527	0.613306
NCU00872	10.9832	4.9264	11.4912	14.4803	8.409
NCU00873	90.264	38.6109	62.7801	57.275	53.9189
NCU00874	10.7765	6.61298	11.3422	12.056	9.09881
NCU00875	6.53502	1.09998	6.82638	6.003	6.63237
NCU00876	3.57346	1.38585	4.06211	4.62159	5.07665
NCU00877	22.3342	5.42027	16.6799	19.2585	26.6345
NCU00878	6.89997	2.54966	4.58355	3.44358	6.42497
NCU00879	62.1445	43.0698	73.4505	59.9385	58.304
NCU00880	49.4245	37.9677	64.8306	57.8033	51.0023
NCU00881	182.605	150.914	130.66	124.776	99.5414
NCU00882	3.04377	1.75865	3.55461	2.59636	2.0283
NCU00883	7.28316	15.1733	9.58018	11.4109	5.68609
NCU00884	157.648	148.64	115.064	97.5574	228.078
NCU00886	8.44137	10.8812	11.8092	12.1807	3.93062
NCU00889	16.9466	10.4731	13.0059	15.9125	15.8086
NCU00890	66.615	11.5875	11.2402	12.2064	2.97893
NCU00891	462.794	997.043	50.2913	174.087	14.4361
NCU00892	5.47438	33.0145	3.32099	7.63344	4.99242
NCU00894	41.9963	73.9778	31.721	33.1048	48.3017
NCU00895	113.4	83.3499	117.442	110.935	172.221
NCU00896	23.3232	32.8685	24.1857	22.068	38.4933
NCU00897	12.266	8.11283	13.009	14.2739	17.1352
NCU00898	25.1887	18.6458	32.3948	31.9808	26.3119
NCU00899	43.889	35.6771	33.9258	30.4368	60.1056
NCU00900	27.213	33.3469	43.6373	32.8772	43.7095
NCU00901	19.5282	14.4263	28.2272	19.8083	14.838
NCU00902	43.8296	38.7118	64.6355	62.211	59.7565
NCU00903	280.118	246.366	308.54	286.421	337.932
NCU00904	25.3196	42.633	23.9141	28.4256	33.6459
NCU00905	15.2906	14.5679	13.7548	13.296	19.8098
NCU00906	12.3706	12.0313	16.1874	12.2681	6.14548
NCU00911	268.257	537.036	278.704	551.848	466.702
NCU00912	7.5957	13.2456	10.2976	12.7094	8.05058
NCU00913	19.0181	17.567	19.4844	21.8574	21.0343
NCU00914	22.5271	35.6338	29.9397	33.4232	27.4233
NCU00915	44.337	62.2945	35.8119	31.0313	34.5006
NCU00916	53.296	34.6648	61.3448	51.1918	82.3741
NCU00917	16.9197	12.7558	24.2127	17.0153	20.3236
NCU00918	80.7045	47.1257	87.8713	77.6598	95.0231
NCU00919	1.37966	10.3788	0.915847	0.796375	2.64781
NCU00920	8.99922	12.598	9.67875	5.4616	9.82411
NCU00921	17.3831	11.3738	27.6397	16.1727	18.7471
NCU00923	23.4486	16.3785	24.3029	18.8438	28.1986
NCU00924	30.5344	16.6395	38.3047	27.0784	36.8809
NCU00925	1.73289	18.1182	1.57776	1.35462	3.61035
NCU00926	6.14024	4.93303	6.9901	5.77914	6.43747
NCU00927	16.8982	23.2315	28.0564	20.6031	15.1708
NCU00928	20.0817	6.91738	22.696	23.9028	17.1605
NCU00929	12.4052	5.40105	12.2537	9.27029	10.3232
NCU00930	60.8004	45.5659	56.364	42.3302	69.4669
NCU00931	2.52576	7.72474	0.997634	0.723526	1.28255
NCU00935	44.7491	188.832	126.037	158.884	46.0414
NCU00936	117.173	84.7497	176.538	146.481	130.582
NCU00937	77.1385	49.0612	77.8128	101.022	117.195
NCU00938	64.2601	88.0631	66.8374	68.4606	68.9938
NCU00939	29.2651	44.8841	60.2966	58.1606	67.5777
NCU00941	2.25859	2.00779	4.38434	3.8455	1.69816
NCU00943	55.7776	55.3	83.1444	48.3235	57.4246
NCU00944	46.8232	21.6628	25.723	21.0498	28.5325
NCU00945	8.4863	2.8948	4.88631	4.6572	8.25411
NCU00949	0.80987	0.890539	0.252932	0.454762	2.43786
NCU00950	5.57902	4.29546	4.69429	4.43382	6.23836
NCU00951	239.225	350.878	406.5	448.199	409.555
NCU00952	10.8242	28.7317	17.7337	12.7484	11.5899
NCU00953	23.4497	7.8021	15.5877	11.5347	21.4276
NCU00954	33.9369	38.5455	55.3976	43.837	26.0144
NCU00955	58.5375	25.4424	49.966	48.2967	161.52
NCU00956	12.682	12.7632	14.0052	10.831	16.2436
NCU00957	135.595	345.545	209.814	226.626	85.8419
NCU00958	28.6177	43.4378	34.5276	29.2564	42.3368
NCU00959	118.703	149.77	222.869	206.524	243.39
NCU00962	9.44667	6.92078	7.95063	5.55009	8.71572
NCU00963	1.27813	23.3265	1.31082	1.12642	2.34942
NCU00964	14.3484	23.4827	19.7809	21.5209	14.6544
NCU00965	126.136	40.0526	122.759	50.745	68.2218
NCU00966	52.4661	22.5498	62.5928	54.8092	69.5692
NCU00967	20.6985	31.6483	30.2201	34.7781	20.8455
NCU00968	31.9809	13.3869	41.8438	21.3673	12.4376
NCU00969	257.325	257.086	221.776	216.989	255.999
NCU00971	77.8205	313.558	25.2631	55.3263	116.571
NCU00972	80.4402	15.7188	6.08603	8.67308	4.97423
NCU00973	4.52583	0.644024	3.88619	2.10953	2.09126
NCU00974	16.2622	17.5089	18.6833	15.6399	16.0367
NCU00975	7.40129	3.8235	8.5617	9.08161	6.74019
NCU00977	10.2672	19.2258	7.04804	6.60257	11.459
NCU00978	17.5491	13.4971	18.684	17.2001	19.1899
NCU00979	113.954	608.859	32.3907	74.7356	186.28
NCU00980	11.7022	12.924	13.417	9.42588	24.8937
NCU00981	36.9797	49.5849	31.012	27.2646	38.607
NCU00983	186.435	167.597	217.425	175.843	194.563
NCU00984	16.7846	10.854	18.2281	21.7511	30.6516
NCU00985	10.6377	1.40469	5.4631	11.4957	60.1061
NCU00987	3.29431	4.61961	3.36879	5.53518	3.08192
NCU00988	174.916	311.58	181.951	362.653	155.808
NCU00990	3.7528	8.40773	6.26899	15.0963	5.01331
NCU00992	57.8896	88.964	136.262	111.286	117.666
NCU00993	3.0255	0.927736	3.59292	1.72946	2.80325
NCU00994	2.40264	0.641791	2.77289	3.33881	5.48721
NCU00995	150.976	122.111	139.463	309.129	547.895
NCU00998	17.6313	19.1173	22.6683	21.0288	24.2586
NCU00999	249.264	350.786	160.214	146.77	230.2
NCU01000	3.22593	7.50891	2.22171	2.26118	4.50418
NCU01001	7.96247	32.6287	10.0783	8.22746	13.0454
NCU01002	92.3683	90.4667	96.8997	96.0228	96.2114
NCU01004	48.3634	43.0743	38.8506	46.0546	53.3765
NCU01005	14.9214	9.49214	15.0673	9.85712	11.285
NCU01006	26.054	30.209	31.0112	26.645	30.3492
NCU01007	27.4288	41.9983	36.7938	31.6975	37.3112
NCU01008	34.0773	44.0121	27.6153	29.1154	40.8249
NCU01009	1.20909	0.25591	1.04153	0.908685	1.45396
NCU01010	11.9071	4.29279	7.64371	7.44418	10.6569
NCU01013	38.4419	15.8263	16.9698	11.9528	25.82
NCU01015	8.66848	11.2017	10.8169	9.0122	9.28746
NCU01016	10.4877	9.16627	13.9744	11.3029	12.3306
NCU01017	2.95591	1.84934	2.8992	2.9281	2.71029
NCU01019	29.795	54.012	42.6068	40.6948	32.7469
NCU01021	54.3941	99.1574	45.0078	48.5106	61.6911
NCU01022	1.37575	7.12253	0.738601	0.631599	2.07581
NCU01023	26.3589	36.4432	26.1626	26.9576	30.1828
NCU01024	42.0956	37.832	31.939	26.942	51.4183
NCU01026	22.7903	14.6806	26.7625	18.7229	11.4238
NCU01032	29.3017	17.208	30.1722	23.0643	20.4528
NCU01033	3.71914	1.06713	18.5738	18.4745	3.97116
NCU01036	92.6239	119.786	139.858	148.223	90.1295
NCU01039	35.5358	74.3205	112.231	106.851	38.0795
NCU01041	12.393	13.4364	19.6986	16.4296	17.0581
NCU01044	28.7587	15.4559	35.6564	35.8628	25.6323
NCU01045	91.2184	81.0172	64.0559	87.5235	96.0735
NCU01047	17.2017	13.2652	19.9593	16.259	14.3714
NCU01048	2.24516	0.312074	2.30606	2.48939	2.46435
NCU01049	2.65387	0	0.235553	0.0573512	0.0741289
NCU01050	2820.08	0.217669	252.378	0.692013	0.587965
NCU01051	16.0484	2.46054	14.8648	19.7596	15.2726
NCU01052	21.9587	2.93156	11.9439	11.5029	14.2211
NCU01053	30.5147	15.9009	42.0406	39.5026	28.0948
NCU01055	10.1827	11.8266	8.54698	9.13343	11.0417
NCU01056	2.94019	1.94599	2.88751	2.3622	18.573
NCU01057	2.50047	2.99922	3.78682	2.26952	5.75408
NCU01058	15.5439	0.805987	6.61031	3.13417	1.99184
NCU01059	40.6461	3.75446	16.7338	4.69989	4.76194
NCU01060	8.02107	8.69635	12.2587	5.74493	11.1205
NCU01061	6.33776	0.823452	4.44182	0.713979	9.83817
NCU01063	6.77453	8.19441	11.5893	12.8296	42.3372
NCU01064	157.555	92.2294	274.788	205.524	259.216
NCU01065	8.80547	31.0074	13.3846	6.21956	14.5094
NCU01066	3.30536	5.49971	4.74648	4.68746	3.06727
NCU01067	11.3815	12.8966	14.3705	12.7424	17.2387
NCU01068	116.69	98.2557	80.8793	42.5779	93.8195
NCU01069	51.2272	62.2524	69.9336	57.7678	75.8921
NCU01070	7.24468	4.98422	5.59301	5.62708	11.0106
NCU01072	31.2342	23.5484	16.2943	17.119	51.4423
NCU01073	4.28712	3.0861	4.86707	2.57388	4.79899
NCU01074	20.0268	23.223	22.8491	21.8677	16.8581
NCU01076	67.2944	0.186462	1.57706	0.646691	0.996622
NCU01077	3.34998	0.293677	1.26995	1.16404	1.54798
NCU01078	6.27338	3.57924	7.01449	6.14825	7.51025
NCU01080	24.0806	16.9173	14.3543	12.3728	34.0388
NCU01081	7.90662	8.18261	11.4703	8.78677	8.04817
NCU01082	5.22144	9.43503	5.87998	6.29068	4.63906
NCU01083	12.7198	43.7443	15.9157	12.5666	9.25921
NCU01084	10.0219	12.3905	9.04404	7.93957	11.1503
NCU01085	7.84842	13.8623	10.1546	10.9206	11.0252
NCU01086	7.62887	4.23403	5.96114	6.91541	8.41501
NCU01088	3.78092	2.44682	6.70847	7.35304	12.3638
NCU01089	11.347	8.43854	15.8039	17.0156	18.0253
NCU01092	29.7256	5.72526	27.2013	21.8135	56.9878
NCU01094	8.2486	4.12994	7.46125	9.82128	8.8072
NCU01097	21.7298	13.4345	12.3625	11.2832	24.6418
NCU01098	5.08379	2.23667	5.7657	5.01577	4.55229
NCU01100	26.4504	29.8216	50.9305	32.4992	26.99
NCU01101	64.0343	40.3978	67.7288	49.3934	59.9919
NCU01102	17.5359	37.6936	19.0792	15.933	15.6529
NCU01104	3.52705	8.03037	4.12731	4.18776	3.49487
NCU01105	1.25473	0.810848	1.25011	1.569	0.912134
NCU01106	4.32853	2.06962	4.18767	3.37688	9.97199
NCU01107	216.64	257.027	330.928	342.117	416.367
NCU01108	7.60402	3.50965	11.0351	8.85955	8.05809
NCU01112	5.16384	9.06749	14.4694	11.1601	12.8184
NCU01114	12.1255	11.6315	11.9025	10.2697	11.8739
NCU01115	0.866659	4.25718	0.416917	0.738244	1.51206
NCU01116	4.60255	8.06737	5.85579	4.96469	7.54562
NCU01118	30.6513	22.1235	26.0405	27.4272	25.8006
NCU01119	21.3826	26.0497	25.1886	23.7832	28.6042
NCU01121	10.4361	21.7258	9.87524	11.3661	15.1495
NCU01122	23.3396	24.5153	28.8341	26.2331	19.8056
NCU01124	5.50363	23.1735	10.6925	13.2139	14.6574
NCU01127	10.8108	28.1075	16.3153	21.359	20.6308
NCU01135	12.1147	3.2822	10.9397	10.334	11.2615
NCU01136	9.90051	67.6833	19.2664	31.9002	3.72192
NCU01138	38.5579	30.2956	34.1578	61.0267	30.3581
NCU01140	213.266	216.52	167.973	215.097	137.803
NCU01141	6.20288	8.32262	8.41895	11.8408	11.8262
NCU01142	211.95	246.671	234.935	226.244	229.347
NCU01143	11.3218	15.4042	15.0771	15.0387	13.3986
NCU01144	12.8221	8.31969	20.9644	18.1414	13.4992
NCU01145	110.844	168.415	128.771	90.9122	62.8377
NCU01146	227.709	134.998	321.232	156.384	130.078
NCU01147	3.96365	1.38697	2.42914	1.71516	3.11662
NCU01148	12.536	3.72884	5.18916	5.39899	6.84736
NCU01149	14.9544	9.10684	13.513	10.4624	12.6006
NCU01150	20.1748	37.2283	41.2687	35.0963	23.6696
NCU01154	16.9022	47.9686	41.1545	65.2125	37.8742
NCU01156	4.78325	2.2486	6.82011	5.81595	6.1013
NCU01157	4.20688	14.9151	5.05794	6.79857	7.55562
NCU01158	5.3983	4.3167	7.26703	7.51967	5.28433
NCU01160	51.6652	76.6536	79.7167	45.8728	37.9066
NCU01161	45.6312	21.8929	37.7874	32.83	32.8529
NCU01162	7.5868	1.55006	7.75288	5.19474	9.78638
NCU01163	18.1155	7.4576	11.2978	9.59495	27.9354
NCU01164	43.7236	59.8652	77.5529	47.233	36.2153
NCU01165	80.4294	73.8957	118.92	110.536	122.6
NCU01166	50.9169	28.3118	52.7671	46.8876	50.1346
NCU01167	4.32778	11.279	15.8311	7.03996	5.97973
NCU01169	116.922	141.359	140.098	134.593	174.236
NCU01170	75.2476	64.0125	111.388	106.605	97.8847
NCU01171	10.8025	15.2206	12.5413	7.3817	9.50639
NCU01172	21.9385	16.9449	28.6022	25.4267	20.4792
NCU01174	24.4543	20.7669	28.1222	23.076	19.8516
NCU01175	184.879	210.918	191.491	152.159	191.729
NCU01176	12.2967	17.6584	25.8426	25.6573	11.1953
NCU01177	34.6601	16.4514	24.881	24.7655	33.5273
NCU01178	22.6449	32.0628	33.9842	33.5802	34.3349
NCU01179	20.5642	66.9032	22.4276	20.8872	25.8462
NCU01180	9.17328	11.2621	12.8772	18.4193	18.9209
NCU01181	110.235	50.6852	136.28	157.987	196.404
NCU01182	9.18525	17.7269	10.948	18.9012	8.88011
NCU01183	34.426	30.9685	26.0428	29.9496	35.359
NCU01184	10.59	13.0159	11.2231	8.53082	12.2351
NCU01186	27.7818	24.8231	36.1054	27.5416	26.1445
NCU01187	19.5038	10.8784	25.5175	21.766	21.7588
NCU01188	16.0295	11.5575	16.4633	13.9551	20.8963
NCU01189	31.5724	26.3448	54.9722	42.2685	23.7649
NCU01190	43.3503	44.5692	57.9014	47.6229	44.0843
NCU01191	5.82164	6.39248	13.4262	10.0747	5.66918
NCU01192	16.1343	21.7952	22.5465	13.8368	11.9342
NCU01193	27.2205	23.6222	37.317	22.6884	129.834
NCU01195	329.184	1003.57	154.73	5.22356	210.383
NCU01196	9.01826	13.2469	8.56134	3.50247	6.53334
NCU01197	217.709	233.342	353.862	319.204	228.715
NCU01198	10.3975	9.53832	10.3766	5.23221	8.10956
NCU01199	24.6739	15.2724	32.5752	20.9985	41.6312
NCU01200	1069.67	662.865	956.495	720.311	561.952
NCU01201	20.0124	24.2666	17.8284	13.6856	30.6947
NCU01202	121.979	86.6913	167	147.836	156.399
NCU01203	4.16542	8.28682	6.83122	5.58844	7.28504
NCU01204	345.948	357.374	509.89	386.386	387.194
NCU01205	17.6132	13.1297	18.4751	21.8631	12.5205
NCU01206	16.0632	19.3551	22.9981	13.4583	13.8239
NCU01207	301.406	249.406	322.047	285.12	318.463
NCU01208	47.4795	55.7447	79.2869	89.9797	62.9469
NCU01209	2.13142	0.998518	3.02252	2.33758	1.79622
NCU01211	10.9811	10.384	8.76886	7.79116	14.0996
NCU01213	42.6621	27.0704	43.923	37.9001	32.9632
NCU01214	2.48141	0.890079	2.98205	3.04638	2.21312
NCU01215	18.2072	17.9136	18.6927	19.9793	29.1305
NCU01216	24.7511	23.31	33.5759	32.398	44.0617
NCU01218	59.5199	49.1763	84.5043	72.426	82.148
NCU01219	204.801	189.146	435.918	573.342	350.365
NCU01220	15.1693	11.2767	15.763	12.9643	18.3776
NCU01221	64.4907	564.245	21.047	54.1638	86.3191
NCU01223	5.44973	1.50791	2.58908	1.40083	7.55824
NCU01224	91.405	79.4926	117.364	86.4821	101.737
NCU01225	56.3818	34.9206	59.1698	60.9288	66.299
NCU01227	67.0431	135.353	81.3157	76.7839	77.9468
NCU01229	23.3372	17.0588	16.7934	18.6529	22.3779
NCU01230	109.52	27.3019	155.53	150.688	115.827
NCU01231	293.219	877.436	732.977	1316.5	312.483
NCU01233	31.3077	138.465	44.4071	75.7768	39.3857
NCU01234	33.2929	60.0934	38.645	28.0853	31.0222
NCU01235	24.3973	24.2557	19.4545	13.2322	22.6336
NCU01236	12.2729	7.50919	10.8959	9.73503	9.95308
NCU01238	16.759	22.2105	23.6135	24.1522	19.8598
NCU01240	105.538	166.045	116.578	193.744	212.06
NCU01241	5.44377	46.2209	3.62852	4.44539	6.49893
NCU01242	22.8741	18.4503	31.2412	26.7422	19.6501
NCU01243	55.3783	46.2277	69.7174	68.6318	78.9113
NCU01245	10.0484	14.5374	8.87558	8.06142	13.0467
NCU01246	5.17366	6.52576	3.52508	3.0834	4.92412
NCU01247	24.3751	30.1041	34.6648	20.86	18.3403
NCU01248	11.1586	9.99946	17.6531	11.6834	9.45117
NCU01249	154.897	190.53	183.075	207.389	168.18
NCU01250	29.4699	12.0533	30.7623	24.1532	43.6986
NCU01252	22.4701	13.6831	23.2556	17.0182	12.4758
NCU01253	13.7039	13.5721	23.4052	19.3103	16.8595
NCU01254	21.9951	19.4665	38.6901	31.0747	26.3573
NCU01255	49.639	36.6237	42.0605	37.7254	50.0354
NCU01256	25.2679	24.8632	34.6996	32.6535	36.2419
NCU01257	1.28293	14.6521	0.561062	0.437133	4.00943
NCU01258	190.821	308.538	183.206	190.635	218.25
NCU01259	5.60998	14.9684	4.57012	5.9095	8.88779
NCU01260	4.52853	3.75363	5.95607	6.62209	4.78595
NCU01266	6.82849	1.98087	5.15276	4.74959	9.14132
NCU01267	24.8799	26.706	43.7984	37.8086	30.8455
NCU01268	38.0172	13.5763	47.9047	30.6969	30.6218
NCU01269	17.7409	12.0254	21.7239	16.6701	19.9271
NCU01270	5.46093	2.36948	9.30457	6.03501	10.5709
NCU01271	25.6204	127.91	11.3379	12.5152	35.4792
NCU01272	23.8465	18.9777	33.9042	27.5921	23.3279
NCU01273	26.4225	23.1551	30.8702	26.5322	27.3448
NCU01274	32.073	23.8392	27.7732	21.7778	19.6607
NCU01275	127.785	60.0768	88.5691	75.3776	105.448
NCU01276	18.9098	24.2121	17.8298	15.4312	17.9527
NCU01277	15.7472	21.5157	16.0287	18.5269	15.2436
NCU01278	28.1832	21.1482	36.0198	25.5166	19.4346
NCU01279	27.6957	16.7523	42.6189	48.8587	27.5232
NCU01281	8.71663	1.20394	5.41572	5.27435	8.37964
NCU01282	53.7635	31.8217	60.4305	64.322	80.0161
NCU01283	22.9635	90.1465	29.9053	56.418	22.3054
NCU01284	14.9953	7.52509	15.6629	12.6323	21.8197
NCU01285	74.6887	33.8447	78.042	102.173	109.761
NCU01288	17.2821	18.1715	23.1378	19.0083	14.285
NCU01289	9.55537	40.1917	12.2306	18.7157	4.76657
NCU01290	5.94	52.4402	2.3862	3.20014	7.57568
NCU01291	35.4505	71.2643	60.721	64.4006	49.2473
NCU01292	2.42522	3.09297	2.7988	1.49476	1.32883
NCU01294	8.18592	28.5982	13.1015	18.8526	11.7844
NCU01296	31.36	18.5623	39.7197	23.596	29.0517
NCU01298	8.28262	6.61859	11.266	9.06891	11.6067
NCU01299	15.4721	24.1672	18.9184	19.952	13.2883
NCU01300	11.9092	50.7729	16.0781	17.9007	14.9592
NCU01301	1.58043	11.3359	1.2563	0.978807	2.41676
NCU01302	5.36803	5.6559	4.67758	4.53058	7.80632
NCU01303	16.2268	16.6698	24.8462	16.8761	15.5575
NCU01304	12.1629	23.8005	7.23853	6.85523	9.29634
NCU01305	21.2261	50.2289	28.2761	27.0344	56.9931
NCU01306	11.7767	23.8929	12.701	12.044	17.0006
NCU01307	19.6931	23.4189	14.2332	13.4121	22.4091
NCU01309	22.8441	32.6406	31.9252	30.0053	20.7703
NCU01310	38.9886	42.1149	53.6333	42.3508	46.3893
NCU01311	3.22527	1.896	4.76054	2.97386	3.28004
NCU01312	28.5503	37.851	39.7558	18.1869	12.8884
NCU01315	34.2778	36.284	43.5561	38.3153	80.8329
NCU01317	82.7842	366.6	23.9254	56.8982	127.543
NCU01318	140.551	111.076	179.556	101.374	96.4195
NCU01319	21.5959	49.7783	29.4004	24.5598	20.2461
NCU01320	90.5051	65.3838	48.5935	12.0285	15.7532
NCU01321	6.26066	2.21579	8.31967	5.98081	6.0196
NCU01322	16.4829	13.4691	18.2798	15.9511	16.1509
NCU01323	21.4298	25.2243	34.0597	18.5456	17.2718
NCU01324	17.3599	9.30994	16.7781	17.9057	24.7199
NCU01327	47.6244	23.7584	49.3405	40.6148	44.0794
NCU01328	631.774	1318.91	353.841	412.187	317.335
NCU01329	3.9272	4.55199	4.2456	3.75889	3.81831
NCU01330	12.2482	11.9651	21.5939	16.8584	14.2901
NCU01331	23.5692	36.6209	7.65062	7.27897	28.5158
NCU01332	398.516	392.478	504.537	429.564	386.42
NCU01333	22.332	87.6481	29.3148	34.4395	18.7818
NCU01334	2.96859	1.22889	1.17511	0.828732	1.56948
NCU01335	27.5649	19.3965	26.5086	23.627	25.6531
NCU01336	14.7535	13.9713	13.6176	11.3102	13.2889
NCU01337	24.884	11.9536	19.5212	17.3558	26.0186
NCU01338	22.7289	9.14403	19.6393	17.4245	23.2212
NCU01339	24.3838	15.0116	23.3499	24.6853	25.1883
NCU01340	8.0788	9.17718	7.5689	9.37282	18.4052
NCU01341	24.2359	22.4267	28.3617	23.4261	24.7593
NCU01342	76.2237	68.8155	80.6097	52.2707	57.7814
NCU01343	13.1686	20.6433	13.7049	19.4048	21.3828
NCU01344	21.4257	21.1683	23.7507	14.0849	19.0839
NCU01345	24.9308	31.8618	32.8607	28.0583	35.1665
NCU01347	19.7549	9.55458	20.4098	16.1384	33.0971
NCU01349	6.77038	3.10136	5.00566	2.79314	7.49652
NCU01353	54.1393	123.001	30.9626	33.6354	15.4303
NCU01355	1.92575	1.21793	1.54902	1.5991	2.49589
NCU01356	32.3829	9.176	27.6623	10.7186	29.9543
NCU01357	5.05876	1.00802	9.24753	7.82812	5.36514
NCU01358	3.04248	2.22557	4.29308	3.9398	4.42884
NCU01360	204.689	141.817	141.189	128.259	242.549
NCU01361	19.5558	13.3135	27.9092	19.6207	15.5015
NCU01362	18.4623	22.0977	22.1385	18.5766	18.0463
NCU01364	80.4184	30.156	47.4176	33.3991	49.9827
NCU01365	8.03023	6.13495	12.3563	9.07351	6.05115
NCU01366	17.2977	16.9593	26.3603	23.209	20.9415
NCU01367	3.05928	13.0437	1.62579	1.43256	5.82106
NCU01368	113.538	105.47	189.575	157.944	140.819
NCU01369	23.1362	78.3196	10.9755	14.5984	39.48
NCU01370	5.36458	7.67589	9.46879	4.13095	4.06578
NCU01371	6.95955	6.73486	7.97895	5.10381	7.52496
NCU01373	2.0656	2.01279	4.06641	3.15478	2.42927
NCU01374	6.52786	3.99891	5.50514	7.2556	7.01608
NCU01376	4.96737	35.3263	6.47402	5.88597	4.8901
NCU01377	7.13937	10.8006	10.7375	5.84427	6.26596
NCU01378	36.9132	38.8397	69.5841	54.4757	51.1316
NCU01379	16.3388	15.32	23.6751	18.6281	15.8412
NCU01380	8.594	4.68752	4.32689	4.46329	12.8619
NCU01381	37.5319	21.3785	21.021	19.3107	46.5996
NCU01382	8.68925	4.14186	1.9326	2.36891	3.07591
NCU01386	35.6313	25.3726	29.1077	29.9244	35.0933
NCU01387	14.3744	7.4904	18.5178	12.9072	13.1866
NCU01388	48.6401	42.9238	48.0274	40.1638	59.1755
NCU01389	16.2784	9.18439	14.8777	12.1894	20.0773
NCU01390	8.93977	7.24324	9.30953	8.93097	13.1085
NCU01391	2.42312	22.5991	30.8165	22.9963	3.26231
NCU01393	14.8627	14.489	14.6506	11.8807	17.5549
NCU01394	1.77159	0.348876	1.18268	0.826045	3.06313
NCU01395	28.3898	51.8518	51.2319	40.2447	13.5443
NCU01399	30.0335	14.9242	23.875	24.0238	43.1667
NCU01400	2.5418	4.00175	4.08041	3.9739	4.69415
NCU01401	8.08118	10.9107	9.98917	10.1185	10.4193
NCU01402	17.4617	1.00624	90.0632	444.378	73.9891
NCU01403	8.40939	7.95187	11.8375	23.0794	13.421
NCU01404	2.72931	3.12658	2.93822	2.61679	3.08845
NCU01407	0.940079	0.274406	0.773625	0.297407	0.686027
NCU01408	39.2612	31.9947	43.8485	38.8995	30.9013
NCU01409	49.683	29.3815	68.9251	66.5478	49.0416
NCU01410	18.9274	19.1318	25.7595	22.0193	25.4222
NCU01411	3.06239	1.27677	2.58166	3.02087	3.73112
NCU01412	12.9119	26.4479	11.7519	13.3415	14.221
NCU01414	131.289	123.197	170.168	132.607	148.582
NCU01416	5.17043	0.44591	5.95487	1.41764	3.1778
NCU01417	139.826	141.394	257.968	207.144	134.309
NCU01418	1701.86	4204.5	2916.98	3325.41	928.785
NCU01419	21.9305	47.6401	26.9329	39.0513	33.1629
NCU01420	136.238	67.2447	106.547	80.0492	96.7802
NCU01421	9.63557	15.3008	17.0513	11.1623	9.59729
NCU01422	74.4489	178.748	64.7101	52.8384	84.9095
NCU01423	3.72273	3.73096	4.04492	3.31322	3.91674
NCU01424	386.085	316.134	258.011	260.057	536.384
NCU01425	85.6541	101.862	101.223	80.4102	86.0402
NCU01426	21.3674	9.19022	21.4331	20.2386	25.0799
NCU01427	78.3644	21.7504	142.608	103.823	108.38
NCU01428	42.7707	100.282	23.2651	58.9676	250.806
NCU01429	10.0209	25.0605	10.5172	13.4007	31.3658
NCU01430	33.4905	100.231	9.46309	22.9646	5.41114
NCU01431	36.6729	45.6488	47.025	51.1074	35.772
NCU01432	22.0222	19.085	26.0788	24.5428	30.2659
NCU01433	24.8212	45.9851	30.7162	24.1452	23.2844
NCU01434	14.6246	11.0947	15.3997	15.3007	16.3501
NCU01435	18.7382	19.4689	24.3404	20.8171	27.2438
NCU01436	362.854	317.489	371.704	341.294	452.012
NCU01438	239.823	521.929	232.525	256.69	311.712
NCU01439	16.1407	115.978	13.5255	15.4176	17.1899
NCU01440	51.0812	94.3392	79.5178	80.1608	52.2353
NCU01441	10.455	3.8078	6.41365	6.38008	14.3815
NCU01442	14.3198	3.72169	14.028	11.6625	12.9836
NCU01443	75.5791	102.112	63.0773	93.1941	80.1568
NCU01444	31.554	40.7772	21.0292	31.7726	73.704
NCU01445	17.4201	15.6876	21.4528	17.1393	13.8478
NCU01446	3.62014	5.89009	6.93551	5.93076	3.40046
NCU01447	16.8122	23.0117	19.0947	13.8776	20.8835
NCU01449	62.4918	97.1199	67.9677	127.493	205.158
NCU01451	108.459	121.422	138.402	181.327	209.251
NCU01452	203.656	686.074	67.4174	115.88	231.506
NCU01453	34.8477	22.2507	46.5668	44.373	57.2866
NCU01454	13.2356	9.94025	14.0897	13.6653	21.1809
NCU01455	33.3838	31.406	37.194	29.08	25.1279
NCU01456	23.3242	22.1325	17.2804	24.5713	25.225
NCU01457	6.03089	7.29747	3.36475	5.08904	8.06874
NCU01458	2.10915	4.82263	0.822172	1.06761	3.30831
NCU01459	14.4571	14.0884	23.7952	39.6657	33.617
NCU01460	29.0744	51.23	55.3291	54.4665	42.0299
NCU01461	20.373	23.437	41.3639	24.8991	17.6838
NCU01463	6.69358	2.55493	9.46156	5.93881	5.47361
NCU01464	26.1003	17.82	41.291	32.6463	32.6348
NCU01465	19.4059	29.0362	34.2969	28.1935	19.6564
NCU01466	11.3923	12.5592	12.5022	7.78003	10.4919
NCU01467	226.1	136.039	128.296	117.079	249.7
NCU01468	17.7583	25.4339	17.995	18.0886	23.7889
NCU01469	12.2292	9.28979	8.61687	8.84151	11.9048
NCU01470	51.0906	46.3996	61.2738	50.6915	57.7163
NCU01471	32.4967	36.5416	42.5986	37.6423	33.9673
NCU01472	2.25593	0.972389	3.535	3.1115	2.23142
NCU01473	13.457	20.7133	9.86027	8.99202	18.7264
NCU01474	17.2777	26.3773	17.0719	16.5247	24.2992
NCU01475	20.9123	9.88499	23.1088	17.3898	35.5861
NCU01476	20.2504	15.44	22.2996	21.3663	22.9757
NCU01477	59.6052	61.9506	72.0392	73.403	74.66
NCU01478	19.9829	15.3283	21.79	28.0323	31.5534
NCU01479	32.8844	24.909	29.4304	28.2228	30.9179
NCU01480	8.29933	6.8497	7.5494	7.75613	13.0044
NCU01481	25.5358	17.7036	23.3467	23.2329	27.9136
NCU01483	172.037	67.0904	266.645	377.769	320.162
NCU01484	641.979	576.404	570.506	596.255	665.499
NCU01485	20.3614	25.7953	12.9617	11.4757	20.2584
NCU01486	17.146	11.3803	12.3274	11.515	18.5172
NCU01487	165.833	305.148	274.608	616.634	602.365
NCU01488	12.021	6.31159	11.1816	17.7442	8.8377
NCU01489	165.916	128.454	104.239	140.991	145.504
NCU01490	6.92194	1.7851	3.91009	4.07827	5.05151
NCU01491	7.85068	2.80101	12.7318	9.99523	7.22228
NCU01493	18.1088	4.54784	21.6272	20.4535	19.1823
NCU01494	5.03136	4.05156	3.72238	4.20269	6.64746
NCU01496	2.71688	1.13919	1.13254	0.872502	1.61387
NCU01498	116.604	103.104	107.64	104.097	95.2284
NCU01499	11.7502	7.77885	9.71317	11.1762	22.1202
NCU01500	33.6482	19.9055	37.4839	36.2784	36.3243
NCU01501	28.6711	36.55	24.8029	18.8737	40.6398
NCU01502	0.420515	5.86392	0.207901	0.15748	1.10051
NCU01503	1.24005	13.0885	0.713743	0.800889	2.458
NCU01504	45.0091	262.939	28.9598	44.4762	151.76
NCU01505	2.67691	0.704598	2.3001	1.96854	2.46343
NCU01506	4.11886	4.98172	4.23206	3.69295	3.88158
NCU01509	44.7018	52.3144	85.2453	58.9118	62.4705
NCU01510	52.2441	20.513	130.345	69.4462	132.252
NCU01511	32.7636	24.061	24.2182	22.5084	36.8843
NCU01512	9.00338	9.52429	10.5351	7.42394	6.95839
NCU01514	2.01896	4.50197	2.01576	2.28273	2.92329
NCU01515	37.3299	55.1031	50.8394	29.4928	35.3882
NCU01516	10.0555	17.1324	6.55907	7.71364	11.2285
NCU01517	36.5324	66.2108	35.4047	140.987	76.8769
NCU01521	5.18017	2.81442	4.58067	4.84239	7.18781
NCU01522	7.35966	4.22605	7.80552	6.56827	5.95312
NCU01523	147.096	135.919	148.999	124.809	174.184
NCU01524	5.19944	25.1252	3.40516	4.12512	8.37449
NCU01525	16.9949	18.436	19.6578	20.421	20.6938
NCU01526	2.23736	0.787479	1.40218	0.682788	2.12148
NCU01527	11.3001	16.7598	13.0693	11.4227	12.2179
NCU01528	1350.51	4985.59	2091.37	2492.28	1944.88
NCU01534	20.5642	19.2814	23.6526	22.0409	29.263
NCU01535	28.4712	56.9129	46.5704	55.7744	70.9585
NCU01539	31.3678	18.0827	41.8431	33.2408	35.6349
NCU01540	37.6985	29.8569	45.2154	41.9719	55.2683
NCU01541	9.60239	23.9097	24.0569	22.577	10.5979
NCU01542	13.6216	18.2517	17.777	16.5928	17.2288
NCU01543	25.2736	32.8982	34.2909	35.298	29.4267
NCU01545	517.634	250.397	533.603	563.37	838.469
NCU01546	30.411	72.0107	13.4129	27.1395	95.4726
NCU01547	79.2944	108.216	138.472	104.678	87.6361
NCU01548	257.296	129.646	222.803	201.496	367.116
NCU01549	24.9083	59.3213	39.9791	37.4983	33.8275
NCU01550	64.3011	127.511	92.8508	48.098	56.3905
NCU01551	26.0068	8.37059	24.0284	15.7026	38.9739
NCU01552	71.0039	217.218	19.4804	37.3873	104.036
NCU01553	1.72474	4.3632	2.90661	4.20643	2.74612
NCU01554	22.8714	20.1439	22.183	12.1544	13.2425
NCU01555	134.774	78.6306	215.486	181.58	160.519
NCU01559	73.0982	82.0208	79.1021	85.1483	127.854
NCU01560	132.964	70.82	72.8238	83.7832	158.952
NCU01563	12.7633	8.61197	18.4349	17.0876	17.9997
NCU01564	30.09	28.8168	35.326	32.7448	37.389
NCU01565	92.2451	84.9089	177.656	175.848	133.597
NCU01568	3.07105	5.61763	2.89972	1.76178	3.47244
NCU01569	16.3786	15.5783	26.9309	21.4521	19.3582
NCU01570	9.89745	6.27597	11.1555	9.46122	11.409
NCU01571	27.0699	14.8334	34.5874	27.0089	38.6978
NCU01572	1.79429	0.656048	2.38366	1.99859	3.50652
NCU01575	52.9587	53.4761	78.2235	62.3421	61.8826
NCU01577	35.7029	11.7559	38.3581	30.5265	43.4845
NCU01579	2.59387	7.82179	4.06606	2.7765	2.71532
NCU01580	8.33767	10.5848	10.914	6.47571	9.76887
NCU01581	8.12713	4.50075	12.1151	8.39109	8.35025
NCU01584	21.0548	12.7375	26.2293	21.7234	15.6923
NCU01585	45.8985	22.0273	42.564	39.9251	58.778
NCU01587	426.316	409.421	460.396	403.981	481.73
NCU01589	10.9015	48.2845	5.83928	6.40499	7.2135
NCU01595	2.39119	9.34103	2.22936	1.73206	2.7651
NCU01596	51.636	61.1211	63.7095	46.9614	62.1184
NCU01597	13.9573	12.6213	17.9713	14.1946	7.79894
NCU01598	2.68126	1.1056	4.94814	3.93809	4.77074
NCU01599	21.6906	18.5404	28.4432	28.9361	30.9653
NCU01601	48.1765	53.6729	78.7979	72.0912	53.4699
NCU01605	22.5481	25.148	33.6798	25.7819	36.5483
NCU01606	216.658	369.726	296.777	294.14	279.099
NCU01607	15.6211	17.4219	13.6551	13.1408	10.9128
NCU01608	2.99353	0.411573	3.63979	3.4972	4.44695
NCU01611	31.3465	14.3942	22.9091	36.4444	46.6924
NCU01612	3.01419	17.6665	2.42562	2.83774	4.80388
NCU01613	9.50322	15.6914	6.47234	10.9841	10.5519
NCU01614	66.5181	94.6906	85.7924	70.2649	66.4
NCU01615	7.15685	2.83042	7.53158	6.34784	8.02629
NCU01620	2.06243	1.21572	2.48039	4.56777	1.72929
NCU01623	7.79739	8.70193	15.3097	7.74146	4.00963
NCU01625	11.8843	8.76594	14.944	15.2613	12.6179
NCU01629	4.2302	2.88031	4.45798	4.03424	14.589
NCU01632	5.50116	37.4872	7.75039	6.39682	5.66818
NCU01633	83.5402	4.78946	5.42372	1.23366	6.84468
NCU01634	1465.57	1216.15	2844.5	945.55	720.429
NCU01635	2006.36	2520.04	3617.95	1692.44	1297.6
NCU01636	85.5632	56.8482	136.124	117.469	137.983
NCU01637	13.1097	15.1191	18.3402	14.2569	14.9961
NCU01638	0.925826	14.5028	1.25111	0.684883	1.96527
NCU01640	17.769	38.9047	29.2087	16.3138	95.232
NCU01642	26.5098	37.5501	39.3776	35.2679	24.7044
NCU01643	8.92371	14.5935	7.57027	7.67797	14.1189
NCU01644	22.6044	23.3923	22.9292	22.2305	26.0765
NCU01645	60.6065	66.5626	95.995	94.4421	94.6506
NCU01646	22.456	11.4918	27.2048	23.8895	36.6234
NCU01648	87.2564	89.7929	91.4556	65.9028	64.1902
NCU01649	23.7913	13.834	26.0621	13.7127	42.7985
NCU01650	27.5137	36.4029	57.72	46.3534	37.3884
NCU01652	17.3611	32.159	17.2838	29.8597	36.6643
NCU01654	49.2722	16.8314	54.7381	89.963	106.789
NCU01655	45.5466	26.125	55.862	47.8249	59.8731
NCU01656	13.3927	12.2042	20.2226	12.7771	12.0505
NCU01657	19.2739	13.9135	17.4728	18.8917	27.6756
NCU01658	52.3059	29.2563	58.7438	46.9457	54.0819
NCU01659	23.3805	44.8982	38.0938	38.4398	21.6684
NCU01660	3.24476	2.13208	6.20073	5.08375	3.34522
NCU01664	20.6612	13.4658	17.5595	14.9469	25.428
NCU01665	25.424	49.987	37.2883	34.5327	40.6938
NCU01666	18.3246	132.526	20.0692	15.2107	20.9012
NCU01667	12.5837	23.9671	12.2755	11.4906	17.56
NCU01668	29.6244	23.9581	43.9794	33.9104	38.3528
NCU01669	7.08843	16.799	3.26754	4.5064	10.0016
NCU01670	22.7616	21.1112	22.4283	22.4558	22.327
NCU01672	0.763901	0.251225	0.447328	0.284849	1.45606
NCU01673	8.76566	9.0566	7.58088	6.13075	16.8187
NCU01674	180.255	99.0926	162.514	107.306	212.742
NCU01675	0.77166	10.8127	0.530418	0.615491	1.3944
NCU01678	5.4651	3.24064	7.83594	6.65045	7.97445
NCU01679	10.0887	8.11247	11.3038	9.46794	13.1658
NCU01680	488.12	2141.92	876.435	790.915	760.497
NCU01689	80.396	105.853	59.9056	36.6337	28.5773
NCU01692	152.482	231.928	137.676	61.1927	98.8463
NCU01695	21.2421	11.8745	25.2876	24.8274	19.6213
NCU01696	12.865	10.6177	15.6399	11.5827	13.347
NCU01697	8.47268	5.08003	2.66043	3.10918	5.28808
NCU01698	40.2677	55.7076	54.6364	37.7002	58.1436
NCU01699	1.46416	1.39247	3.94229	4.97429	1.82465
NCU01700	8.92505	12.0397	14.8131	10.9652	12.3339
NCU01701	59.9106	110.915	34.0625	36.7306	38.7243
NCU01702	38.1645	57.2277	51.8213	36.4048	33.9659
NCU01703	55.3434	40.2757	57.9124	37.6466	57.8041
NCU01704	232.294	225.761	142.64	114.953	143.834
NCU01705	11.8673	6.78473	14.8741	14.3328	11.1841
NCU01713	13.7552	21.1471	20.0811	14.616	15.8845
NCU01715	12.3592	4.82661	11.5366	9.99851	17.1644
NCU01720	28.1146	125.661	81.1331	85.1055	6.64126
NCU01722	28.8563	45.9339	36.7908	42.7401	26.4876
NCU01724	20.6694	13.8856	21.2094	22.797	24.7314
NCU01725	4.71522	8.26567	3.76664	4.29668	5.38987
NCU01728	7.54443	23.9998	4.32544	5.68511	7.73109
NCU01729	29.2722	29.1596	34.6967	32.8835	25.4228
NCU01731	70.2323	45.1288	79.1963	68.3693	75.9499
NCU01735	1.59952	0.809283	2.20849	1.73898	3.06671
NCU01737	40.1125	28.3927	36.6535	33.0036	31.8588
NCU01738	39.0805	38.7485	46.8683	41.7325	43.6543
NCU01739	43.551	35.8754	64.0021	48.5098	68.4444
NCU01740	572.649	365.647	806.038	639.109	491.044
NCU01741	35.2973	16.239	15.598	11.8589	27.892
NCU01742	19.8453	47.173	17.4508	23.2639	35.6771
NCU01744	68.9934	123.283	61.8295	74.4886	124.956
NCU01745	53.4656	59.3644	65.8026	58.1931	69.2752
NCU01746	12.7219	13.138	11.4612	14.2965	14.6782
NCU01747	33.0232	25.8466	35.984	43.0667	47.0821
NCU01748	42.1715	94.0287	57.9164	74.0574	229.623
NCU01750	20.5642	23.9129	19.6385	32.751	39.2105
NCU01751	36.8471	27.0504	25.3686	38.6629	53.7508
NCU01752	52.6374	181.039	37.7407	45.1067	29.9263
NCU01753	18.963	13.8689	20.5733	16.7582	19.4691
NCU01754	674.42	1567.11	1075.22	2522.32	1446.32
NCU01756	127.685	149.977	173.67	182.609	179.789
NCU01757	5.00688	2.56075	6.15094	8.06168	7.69839
NCU01758	16.6211	13.4897	24.5818	21.2943	17.0647
NCU01759	43.6434	73.825	69.7326	75.9851	57.376
NCU01760	1.73714	0.610357	1.72076	2.11686	2.56775
NCU01761	28.8947	21.5539	25.2174	26.2959	44.2108
NCU01762	9.20967	8.33836	11.4356	14.1141	13.9539
NCU01763	40.7576	29.5039	57.2062	90.0627	85.1783
NCU01764	13.0913	17.5577	11.9097	10.3504	13.6466
NCU01765	300.514	297.049	264.722	253.546	248.141
NCU01766	61.8396	33.1002	51.6598	64.0664	66.8777
NCU01767	58.8899	50.4625	57.3407	54.4739	69.8975
NCU01768	144.991	151.018	167.768	149.34	156.051
NCU01769	74.5317	54.4313	99.3296	85.7385	127.991
NCU01771	16.7705	10.0034	10.0362	8.23324	17.856
NCU01772	3.75639	10.0393	3.40005	3.88717	5.21704
NCU01776	59.9262	388.075	16.0513	33.7231	85.6523
NCU01777	136.651	75.3232	207.096	142.086	94.8703
NCU01779	14.2143	22.2486	20.1245	17.7722	29.0651
NCU01780	1.65033	2.81458	2.02553	1.95232	2.5275
NCU01781	68.425	40.6081	116.751	111.724	76.3548
NCU01782	40.0768	42.4526	65.5296	58.9142	55.2071
NCU01783	19.4144	11.3317	21.7147	16.1039	24.255
NCU01784	7.81385	5.65111	5.42455	4.17393	8.11554
NCU01785	7.74558	9.72249	7.69709	3.57948	6.28233
NCU01786	8.93006	40.4508	3.37339	1.74034	11.1732
NCU01788	19.7058	9.90286	25.7995	21.1656	33.0865
NCU01789	16.2185	35.2793	13.0009	16.6254	8.72927
NCU01790	10.8506	8.50373	9.40787	4.12032	7.27702
NCU01791	36.7598	22.056	41.7114	37.9199	53.5367
NCU01792	125.558	227.844	187.247	157.635	144.914
NCU01793	49.1784	102.692	102.632	73.2743	55.1831
NCU01794	123.607	111.656	187.595	101.95	70.9825
NCU01795	27.5562	38.8417	31.3629	24.24	26.3773
NCU01796	12.0298	14.1724	18.3688	12.0966	10.7059
NCU01797	70.9833	57.0393	60.5743	69.3515	111.431
NCU01798	0.851773	0.977804	1.28968	1.99393	1.8982
NCU01799	13.5255	13.0182	14.2988	10.509	8.28162
NCU01800	15.696	31.3788	21.0469	21.1725	16.8775
NCU01801	59.979	17.9003	44.6971	47.4105	78.4599
NCU01802	1.78661	0.33821	0.602213	0.853082	1.68578
NCU01803	23.1541	18.2719	29.63	25.869	15.8239
NCU01804	12.6881	17.5656	10.4316	8.09651	10.231
NCU01805	17.2687	11.518	17.6522	14.6472	14.1376
NCU01806	14.3857	20.293	17.9362	20.087	14.6173
NCU01807	14.7429	21.3708	16.1907	19.5987	42.6514
NCU01808	27.6026	196.401	27.8214	38.596	98.7199
NCU01809	5.22783	6.20044	3.66952	3.83788	7.41236
NCU01810	12.0926	11.802	16.1865	17.482	20.4356
NCU01811	4.77541	2.4518	4.76254	4.48361	6.64073
NCU01813	47.9981	23.209	49.6981	52.494	95.212
NCU01814	27.6316	32.7574	41.3783	42.9895	55.1234
NCU01815	129.17	65.5823	189.386	177.779	151.771
NCU01816	45.4434	59.6352	63.0671	85.3565	124.658
NCU01817	24.6159	26.1535	26.1949	26.1958	32.7143
NCU01818	18.7622	7.7766	17.7102	18.2625	16.4471
NCU01819	11.4409	4.3873	13.9906	13.026	11.5186
NCU01820	82.1345	104.355	134.138	113.18	65.4488
NCU01821	64.7231	71.2742	58.1563	52.1148	66.7906
NCU01822	27.1496	27.323	35.3055	30.5733	24.8764
NCU01823	17.1927	11.0391	9.918	10.5695	15.911
NCU01824	131.731	358.955	129.352	172.146	60.8358
NCU01826	46.383	69.9305	44.0353	52.6309	37.9038
NCU01827	90.5561	624.545	39.9701	81.1786	118.715
NCU01828	6.52972	6.12522	8.2169	7.01713	6.24097
NCU01830	115.045	1.74098	46.1843	348.368	90.0572
NCU01831	12.5288	12.1623	24.0092	15.7063	16.1868
NCU01833	15.5278	9.39873	25.1651	18.8774	17.4526
NCU01835	356.024	912.657	1342.88	1269.29	958.951
NCU01838	61.7515	73.5563	108.666	84.7928	104.975
NCU01839	34.6009	12.3127	31.7048	37.4537	43.4523
NCU01840	17.4868	4.85187	12.1965	11.452	13.6335
NCU01841	11.8655	3.85354	8.39641	7.29796	7.95549
NCU01842	20.594	23.5817	28.1214	18.2256	13.5583
NCU01843	27.6212	59.6806	29.376	36.5117	34.7363
NCU01845	24.4742	86.2345	27.0994	74.328	96.6173
NCU01846	21.9055	27.4481	20.7476	20.8445	31.4247
NCU01849	1.98894	1.12312	1.59985	1.59704	4.36861
NCU01850	23.7334	21.8747	24.0586	30.3154	44.7994
NCU01851	3.78708	4.22363	5.82385	6.38639	7.1668
NCU01852	4.7761	3.57255	5.86094	5.49912	10.0285
NCU01853	8.1879	1.03568	3.09717	3.3617	5.80117
NCU01854	57.2447	50.8866	49.7393	58.9361	87.2775
NCU01855	5.98983	9.33994	4.62285	3.93586	7.75338
NCU01856	183.942	145.468	125.187	67.1417	98.8933
NCU01857	25.9584	18.3409	36.121	33.7507	27.9349
NCU01858	10.9567	16.1714	21.8942	10.0114	10.4984
NCU01859	229.655	201.612	184.165	181.715	255.378
NCU01860	2.54533	0.988178	1.58926	2.18347	4.75411
NCU01861	26.9407	134.548	114.467	258.338	146.864
NCU01862	19.6652	4.90525	34.1814	24.0912	17.591
NCU01865	11.3136	8.7221	15.3608	12.5836	11.1637
NCU01866	41.9167	102.528	9.27374	23.0436	3.50984
NCU01868	20.1517	2.34253	20.0915	14.9417	28.3604
NCU01871	9.03614	443.307	10.4011	281.384	672.274
NCU01873	1.4048	1.38483	0.564463	3.6311	20.9626
NCU01874	3.42737	0.584526	3.55607	2.36514	5.0223
NCU01878	31.8931	26.781	37.6983	37.3929	35.1879
NCU01879	64.7163	26.6066	80.8169	70.1638	66.8197
NCU01880	3.14948	0.684985	3.49855	2.50072	3.76686
NCU01881	61.2439	27.338	66.6236	84.7081	85.0166
NCU01882	18.3795	34.719	12.4499	7.68663	29.0481
NCU01883	18.2328	33.7241	21.9461	19.8325	34.4606
NCU01884	4.07663	4.51105	10.2072	5.41569	3.31693
NCU01886	74.5047	194.764	78.0433	82.5582	308.412
NCU01888	2.75211	4.73718	2.7861	2.86273	3.80169
NCU01889	21.953	14.8549	21.4567	21.3241	31.0429
NCU01891	22.0569	8.39651	28.003	21.0318	26.702
NCU01893	14.8254	7.63262	29.272	18.4654	18.9638
NCU01894	30.175	39.4103	19.0695	16.7173	25.2711
NCU01895	21.4647	19.4536	29.3175	25.345	40.4089
NCU01896	2.42811	1.79099	2.82777	3.36056	5.44014
NCU01897	15.3927	7.90007	12.8696	12.1208	34.6419
NCU01898	4.35435	6.13258	2.43116	2.96966	20.1138
NCU01899	2.89517	1.13093	1.93382	1.91447	3.72341
NCU01900	2022.62	1689.32	107.835	288.705	16.6938
NCU01901	19.1256	13.8491	11.5223	20.5536	26.6075
NCU01902	40.2836	45.0899	20.1877	39.1407	50.0878
NCU01903	5.16434	1.62326	2.82043	11.0326	20.4626
NCU01904	31.7504	178.888	24.8807	54.0844	20.9897
NCU01905	20.3136	67.2703	10.8867	31.0223	11.9786
NCU01906	135.998	552.254	45.5355	93.978	36.7918
NCU01907	21.8522	36.0158	26.1463	25.2362	27.742
NCU01908	19.8053	30.8541	27.9048	36.9739	29.5297
NCU01910	10.6165	26.9898	17.4273	23.8864	11.921
NCU01911	25.9789	27.8134	37.1316	39.7514	63.1474
NCU01912	170.905	113.232	161.256	131.756	119.043
NCU01913	34.9765	38.3302	44.8767	36.2775	38.8603
NCU01914	57.7897	55.3935	58.9834	47.1758	69.4835
NCU01916	1.08563	9.07902	1.03058	0.924963	1.69452
NCU01917	0.838303	0.342577	0.900462	1.76806	1.43446
NCU01918	66.045	56.625	68.4881	58.5175	72.7763
NCU01919	70.8925	59.68	80.9801	72.8306	71.8168
NCU01920	14.3155	11.2767	15.1656	15.7445	14.7966
NCU01922	38.297	13.6985	42.0798	22.984	52.8981
NCU01924	63.7294	67.9998	63.6238	114.278	233.676
NCU01926	2.2675	8.41785	4.38037	12.1915	10.6501
NCU01927	56.1951	53.5902	63.9249	61.4366	64.1084
NCU01928	43.4254	20.9641	57.5142	40.3451	39.8858
NCU01929	32.9224	53.2157	62.3492	54.717	49.6299
NCU01930	54.6205	82.6664	104.419	72.0016	55.5119
NCU01931	6.84209	3.12089	8.54927	8.74241	15.5923
NCU01932	21.5231	26.3579	32.4041	24.3106	23.342
NCU01935	10.1198	11.7182	17.1441	13.1157	13.3193
NCU01936	12.7467	13.5918	18.0166	11.3359	15.0799
NCU01938	29.4896	10.6232	22.9146	16.954	37.9008
NCU01939	55.4049	102.426	65.6937	71.7362	59.1675
NCU01940	39.0933	70.4368	41.2191	33.2354	67.9513
NCU01944	27.9328	4.01727	5.0431	7.08299	18.0117
NCU01945	33.5812	15.5532	31.466	70.6594	135.751
NCU01946	11.4005	2.55551	10.5632	6.33076	35.1545
NCU01947	28.3341	21.2336	45.3457	36.3983	30.2528
NCU01948	70.814	361.656	20.7149	57.9903	100.088
NCU01949	98.8836	441.378	27.9832	49.0984	125.004
NCU01950	25.4591	13.7862	30.0131	18.8882	33.3321
NCU01951	4.93323	2.43911	7.43537	5.53745	3.41635
NCU01953	72.6327	84.5505	113.971	98.3115	45.8972
NCU01954	13.4392	8.7637	14.3595	14.7661	21.9257
NCU01955	84.7382	42.5666	81.838	86.6394	133.411
NCU01956	57.024	73.0533	87.9057	84.3133	74.292
NCU01957	29.9731	108.607	65.5399	53.2321	36.6095
NCU01958	38.6768	35.0327	147.681	66.3564	23.9989
NCU01961	7.50448	3.30793	9.96921	5.00592	6.33044
NCU01962	263.467	290.088	271.114	240.889	315.699
NCU01963	19.5519	10.2773	26.779	23.3951	23.8035
NCU01964	63.6233	29.4617	67.346	69.0849	103.233
NCU01965	35.397	67.8452	27.2745	35.8583	44.6269
NCU01966	119.347	334.511	23.6015	50.1185	173.326
NCU01967	18.2389	17.2204	19.6907	23.1945	18.2168
NCU01968	45.8312	23.3982	56.2339	52.8878	66.0271
NCU01969	16.9381	13.8084	21.4922	17.4775	19.2545
NCU01970	102.821	119.728	139.251	118.825	61.1504
NCU01971	15.9144	14.9568	18.0417	11.9738	11.0637
NCU01972	64.2907	18.3806	92.1603	27.4069	92.0969
NCU01973	26.1466	8.10234	28.6694	25.5763	20.0222
NCU01974	10.7927	9.43139	15.6168	11.8496	13.0919
NCU01975	57.3099	47.861	49.963	46.3189	63.9645
NCU01976	4.34709	4.67172	5.3125	8.866	6.82165
NCU01977	40.8065	148.165	22.0112	57.1899	67.4181
NCU01978	8.25015	2.21776	4.28565	5.06817	4.13799
NCU01980	4.45242	2.91269	4.75958	3.90008	3.77283
NCU01981	405.182	371.273	475.824	324.768	481.622
NCU01982	11.212	8.43613	11.8437	15.6607	13.9066
NCU01983	20.7185	16.2102	6.36072	7.23581	8.0949
NCU01984	18.7736	26.5189	24.2197	21.0131	14.8348
NCU01985	9.04922	304.526	13.4436	16.1383	12.7252
NCU01989	83.8512	31.7196	178.142	84.2564	117.754
NCU01990	33.9161	54.2983	47.3007	44.4008	39.2366
NCU01991	27.8657	34.2433	35.2474	28.1844	26.6209
NCU01992	178.554	159.199	210.069	147.843	133.069
NCU01993	6.98377	25.5218	7.32667	9.10443	8.12185
NCU01994	56.577	43.4141	75.0949	79.3383	86.8159
NCU01996	27.18	22.2343	31.4535	28.9857	19.547
NCU01997	11.8413	11.3789	11.4737	9.36177	12.6145
NCU01998	16.7191	83.3849	28.9955	44.4497	9.87083
NCU01999	15.0629	15.77	18.3254	15.6642	14.227
NCU02000	46.5256	55.3116	86.0655	53.575	45.7931
NCU02001	23.9465	22.2124	32.9999	17.8349	20.754
NCU02002	2.15329	4.50254	2.54973	1.95838	2.782
NCU02003	3066.19	5206.06	2991.56	2865.12	3697.22
NCU02004	46.9641	68.6751	45.3288	32.1972	33.6284
NCU02005	4.05801	45.891	3.08771	3.80099	4.63549
NCU02006	20.3826	18.2791	25.7849	17.5048	17.7164
NCU02007	105.917	54.1115	73.1637	62.9343	95.5707
NCU02008	57.4085	12.6232	20.7739	12.935	23.3693
NCU02009	417.296	81.5383	97.4829	54.6005	85.6646
NCU02010	18.9206	64.2569	25.7278	21.2985	18.4769
NCU02011	78.1263	110.858	124.069	102.016	71.1598
NCU02012	30.362	24.1809	42.4911	27.6221	29.0596
NCU02013	32.4835	51.0938	25.3289	26.2451	43.5066
NCU02014	10.5014	5.54783	8.35432	5.99224	10.0901
NCU02015	48.8055	37.2509	62.7238	54.3798	46.3646
NCU02016	235.453	276.573	309.651	237.326	244.333
NCU02017	57.5317	63.0131	94.9549	77.7424	65.3021
NCU02018	78.757	144.416	125.183	132.456	100.192
NCU02019	26.943	20.1127	18.7622	12.5497	20.2018
NCU02020	39.4355	78.1573	60.8244	51.9759	17.5688
NCU02022	6.45825	3.52603	2.46535	2.1769	4.77127
NCU02024	16.034	20.1855	22.0133	17.1225	19.9576
NCU02025	21.7948	21.3288	24.4864	15.2363	26.2966
NCU02026	19.615	13.2336	23.6104	17.6445	19.0181
NCU02027	165.301	80.0822	135.88	139.17	201.087
NCU02028	47.0146	34.1478	52.4128	50.173	53.4547
NCU02031	53.1203	19.5452	108.172	74.3145	60.1824
NCU02033	30.9221	30.7651	26.9293	27.3731	38.6347
NCU02035	1.23408	0.525188	1.81834	0.834841	1.81102
NCU02036	5.48119	8.5515	7.17292	5.2699	5.20312
NCU02038	26.2722	13.9453	17.5665	18.7802	34.5483
NCU02039	17.4446	10.8339	23.1313	21.2693	24.1052
NCU02041	239.55	271.45	310.02	271.516	319.417
NCU02042	15.7933	10.8728	8.52209	5.97664	16.4951
NCU02043	22.3652	5.79872	13.9881	12.8329	21.3956
NCU02044	141.362	118.7	113.54	120.257	134.084
NCU02046	9.47209	3.87163	7.39064	6.3358	19.8666
NCU02048	14.4405	18.9795	17.4785	13.83	13.8122
NCU02049	6.33847	9.46649	9.8963	10.8283	4.94914
NCU02051	10.8028	4.87245	5.21504	3.55617	13.8034
NCU02052	10.4425	8.69752	14.3111	10.7138	7.93044
NCU02053	6.82296	3.3878	4.77471	2.99716	5.77381
NCU02054	16.3256	10.8272	17.5136	15.3372	16.7517
NCU02055	21.2881	18.5618	14.5082	18.5702	38.1957
NCU02056	31.5575	40.2341	14.3582	14.7909	15.4797
NCU02057	18.0492	20.1646	27.2238	28.046	27.1295
NCU02058	8.34005	9.27732	9.19209	6.37894	6.55735
NCU02059	86.5135	29.128	16.3279	17.9457	27.5013
NCU02060	10.1411	1.3184	5.2146	3.63552	7.72869
NCU02061	7.64334	5.7087	0.573823	0.15967	5.11188
NCU02063	9.96339	14.6102	12.9644	12.0247	9.09194
NCU02064	48.6277	83.1846	35.4625	38.9704	59.1776
NCU02065	7.44089	7.2091	4.53351	5.1593	11.2114
NCU02066	2.83159	15.494	1.07465	1.45838	4.16239
NCU02067	4.83753	4.19926	8.67351	6.92829	5.80459
NCU02068	16.7438	21.4711	20.3151	14.9433	9.32543
NCU02070	15.8469	15.0333	19.7622	25.0879	36.2048
NCU02071	2.57802	1.56726	1.84543	1.75342	5.44801
NCU02073	5.65915	2.75573	5.05643	4.16683	6.31001
NCU02074	20.6841	14.9046	21.0812	16.7197	60.8243
NCU02075	25.2304	526.643	6.00235	11.9745	66.906
NCU02076	53.2847	77.293	34.941	33.5597	59.558
NCU02078	24.7435	23.1467	35.9236	27.8588	24.5459
NCU02079	31.1628	27.289	50.4104	38.4308	42.8567
NCU02080	17.8169	8.38088	19.0176	23.6168	33.1999
NCU02082	14.7846	13.3658	21.4357	18.1016	16.9457
NCU02083	31.6078	16.6548	34.4692	34.1491	31.5468
NCU02084	10.2196	23.1652	9.15051	13.7445	43.4848
NCU02085	1.97388	0.703624	2.16221	2.04673	3.20902
NCU02086	62.5724	138.104	86.6398	129.639	65.3934
NCU02087	1.91843	0.532148	2.00878	3.80195	2.83328
NCU02088	1.82793	0.4848	1.06244	1.64906	2.71338
NCU02089	11.1797	11.9148	7.49994	8.87927	10.9963
NCU02090	67.3056	123.46	67.3666	96.7687	208.507
NCU02091	7.67037	2.41088	5.03532	2.65533	4.97462
NCU02092	5.05301	10.4555	4.61376	7.89879	9.06365
NCU02094	52.2359	40.1083	42.3878	43.7975	85.9292
NCU02095	39.4769	30.7959	44.1559	33.4794	38.8702
NCU02096	9.44358	9.21119	16.563	17.7043	51.5918
NCU02097	915.905	986.642	942.55	1171.5	434.104
NCU02098	40.7119	93.954	36.4498	37.5474	120.668
NCU02099	65.3854	121.071	60.0868	77.8288	169.255
NCU02100	29.7259	18.3802	46.0827	37.4503	46.8404
NCU02101	4.97602	3.3558	9.7204	5.27292	3.54492
NCU02103	47.6292	54.8046	47.3317	39.2244	48.1112
NCU02104	10.0787	8.76359	14.4262	8.66946	9.58312
NCU02105	8.26308	9.64786	8.08419	7.58612	8.96145
NCU02106	5.95557	8.02055	3.03774	2.42055	7.00607
NCU02107	12.2032	12.0702	13.3665	9.45658	11.8414
NCU02108	20.7969	17.5673	21.3641	22.6515	17.3147
NCU02109	87.2791	76.1645	118.349	101.552	109.158
NCU02110	23.1768	33.6873	16.3097	17.1497	16.0612
NCU02111	36.7927	44.4448	49.08	44.003	48.0744
NCU02112	18.8072	12.7843	25.5192	22.0949	16.8141
NCU02113	69.66	87.0282	91.8537	84.3226	86.0981
NCU02114	82.7958	111.763	160.458	146.022	89.9206
NCU02115	18.3437	24.7822	26.4762	20.651	15.9247
NCU02116	35.5353	23.4141	42.5538	38.2835	32.0419
NCU02117	26.0091	38.7404	29.9282	26.2323	26.2373
NCU02118	7.99099	3.90171	9.08694	9.291	14.5415
NCU02119	5.05496	6.46778	7.53304	6.56819	5.11239
NCU02120	12.709	15.2142	20.7418	17.0631	19.5387
NCU02121	11.6498	17.1325	18.8034	15.6741	9.87998
NCU02122	12.7291	4.94082	23.6029	10.9183	18.8839
NCU02123	3.07897	2.34454	2.96866	2.25872	5.03951
NCU02124	388.23	319.371	637.13	502.376	508.233
NCU02125	2.35306	0.705298	3.74243	2.2749	1.42521
NCU02126	25.8211	10.9872	47.8379	95.0453	50.3892
NCU02127	35.6178	12.3888	87.0599	157.686	95.7576
NCU02128	33.4569	145.15	36.2811	25.9585	16.4817
NCU02130	30.451	12.7364	64.8694	60.7302	51.0262
NCU02131	22.7503	20.232	35.1458	30.565	23.3716
NCU02132	6.69264	3.86656	10.2228	8.12733	8.45446
NCU02133	322.215	580.637	497.042	514.871	349.076
NCU02134	180.195	173.308	191.881	170.911	101.616
NCU02136	321.361	915.275	312.94	378.243	195.813
NCU02137	6.93176	8.73135	8.97692	8.64756	9.31919
NCU02138	18.6725	4.96755	8.21338	4.67002	21.9832
NCU02139	110.86	52.2056	143.755	93.282	169.915
NCU02142	3.13266	2.77031	5.41798	2.79579	2.09069
NCU02147	12.957	10.4668	16.7971	14.6052	11.7934
NCU02148	22.053	21.3035	21.4064	35.8492	36.7394
NCU02149	15.0947	15.6235	14.7603	16.5727	22.7536
NCU02150	12.2333	2.96412	16.2809	13.1334	14.5003
NCU02151	46.4205	24.5239	52.0962	42.928	53.8211
NCU02152	27.8612	22.8894	21.2802	17.7359	30.2323
NCU02153	27.4489	15.1005	26.7665	22.5435	28.5962
NCU02155	0.497622	4.15427	0.33623	0.163727	1.38912
NCU02156	48.7203	26.1267	28.2413	29.9044	63.0756
NCU02157	12.8965	8.10588	11.8841	9.61577	16.9936
NCU02158	7.56228	3.44028	7.43838	6.70761	8.35447
NCU02159	5.46532	15.733	6.66646	5.61706	6.64863
NCU02160	143.024	178.739	193.186	168.46	170.067
NCU02161	3.40569	4.12388	6.2053	4.09603	3.90897
NCU02162	3.5833	8.24506	2.71311	4.29204	5.45164
NCU02164	33.0998	24.4567	56.8786	31.8175	106.091
NCU02165	8.88535	3.46819	4.88349	6.27845	4.7988
NCU02167	27.6853	31.577	17.7699	20.9004	21.3585
NCU02168	6.97559	5.94546	8.64372	8.1713	9.59666
NCU02169	2.33945	6.00104	3.57408	3.94728	2.86142
NCU02170	1.04864	1.54098	1.3372	0.87947	2.10199
NCU02172	12.8625	34.8627	22.7221	26.6488	15.1188
NCU02173	14.6787	14.0619	17.8782	13.6269	16.5701
NCU02174	9.18634	17.8676	13.8615	14.5457	19.2121
NCU02175	22.4416	19.6737	22.9758	10.9494	75.9135
NCU02176	24.9044	22.1426	20.9387	19.3314	25.7276
NCU02177	23.318	25.6475	38.1387	42.1016	33.2132
NCU02179	186.672	211.488	202.894	220.453	263.944
NCU02181	92.9528	510.834	36.1113	57.5859	125.75
NCU02182	11.9842	20.3821	10.7305	13.8625	22.4727
NCU02184	6.13729	99.4278	4.51584	18.2224	1.70364
NCU02187	134.332	104.117	180.722	193.899	200.68
NCU02190	6.9951	10.3427	10.4011	14.3305	44.0541
NCU02191	66.7333	153.622	83.3092	73.6737	123.108
NCU02192	2.99518	7.37371	5.2971	3.26285	5.43612
NCU02193	57.0431	156.276	23.4188	42.3357	259.587
NCU02194	4.76991	12.145	6.28482	8.8947	16.9529
NCU02196	2.1665	1.06653	2.76945	3.36502	3.51429
NCU02200	31.0406	43.7146	40.6687	32.4809	37.3417
NCU02201	13.9593	8.82847	15.1396	11.4436	11.7202
NCU02202	71.8044	47.8663	102.394	72.1362	66.6087
NCU02203	28.6387	40.8211	31.0631	33.9868	34.371
NCU02204	20.6498	15.3276	20.8353	16.5936	18.6596
NCU02207	63.6605	95.8352	47.3029	56.7669	61.0746
NCU02208	44.4279	99.6726	22.762	27.1553	38.2499
NCU02209	26.0713	341.68	9.33598	17.2511	43.2108
NCU02211	62.6298	59.6848	122.028	112.562	57.5504
NCU02213	4.07601	2.14736	4.13018	3.3022	5.34753
NCU02214	18.8929	13.9875	26.6765	20.0249	16.3862
NCU02215	2.16121	0.754754	2.49115	1.29287	1.41558
NCU02216	39.5875	24.6542	55.6188	60.6436	50.8301
NCU02217	10.1083	8.67047	9.84488	8.98865	13.0211
NCU02218	6.76208	9.32527	7.02289	6.98537	8.87208
NCU02219	43.0287	53.8437	52.2814	45.1856	32.5694
NCU02220	3.31593	1.657	1.29082	2.36458	1.76178
NCU02221	4.82484	5.34163	8.45445	4.74336	3.53267
NCU02222	3.62806	1.54288	6.65678	3.63598	6.02293
NCU02223	26.2309	42.7278	49.3461	34.3231	29.2789
NCU02224	74.3609	97.0563	128.694	95.6709	82.1061
NCU02225	15.8422	17.057	22.7438	19.0683	10.5852
NCU02226	3.54162	12.6806	3.1842	2.91314	3.84945
NCU02227	40.1669	31.8439	60.171	58.2648	52.588
NCU02228	27.8185	22.74	29.5985	29.7713	28.0369
NCU02229	14.984	16.3948	11.6039	10.9124	17.2309
NCU02230	10.3412	12.7891	14.9774	7.91505	8.91808
NCU02231	8.75988	11.7388	7.64706	7.79499	8.62898
NCU02232	14.3016	20.6146	19.1779	9.98131	10.0199
NCU02233	33.1898	22.2979	40.9636	31.7797	35.91
NCU02234	47.3484	34.104	45.122	46.8671	42.0937
NCU02235	80.2005	34.2684	95.7191	86.4776	60.0779
NCU02236	6.80315	24.296	7.58648	5.88489	7.79937
NCU02237	3.72849	3.91596	3.2489	3.67918	3.44904
NCU02238	115.624	13.235	205.446	73.9659	151.44
NCU02239	9.77001	2.56558	6.42268	6.98185	5.12423
NCU02240	1700.19	4.00175	55.4231	10.7769	7.72674
NCU02241	8.11249	8.64116	12.8816	6.83897	6.67415
NCU02242	13.2052	9.88231	18.5183	14.424	17.1474
NCU02243	8.17754	3.16302	8.27316	8.77264	7.41483
NCU02244	12.6331	46.7169	10.4144	10.1426	62.2298
NCU02245	8.30765	8.12594	5.25806	6.34653	9.67915
NCU02246	1.64656	0.80911	0.453552	0.58462	1.26329
NCU02247	16.6657	11.7683	19.8919	14.8965	10.2106
NCU02248	27.369	22.7961	29.7514	28.1447	18.3129
NCU02249	21.8481	20.4582	32.9554	22.3522	22.5265
NCU02250	850.163	1474.47	769.988	655.474	1299.39
NCU02252	51.3396	180.908	30.313	35.0341	31.2279
NCU02254	20.2621	15.5672	19.3276	13.4486	16.8558
NCU02255	22.0341	16.3861	17.5189	15.8583	23.0099
NCU02256	7.3021	13.745	6.64671	7.37534	12.0287
NCU02257	7.95358	4.8461	8.41549	9.93297	13.5371
NCU02258	2.7419	2.46627	4.63157	4.61091	7.38165
NCU02259	7.73121	4.23595	9.39867	9.09594	17.7794
NCU02260	56.488	61.97	69.3055	55.5796	70.6926
NCU02261	109.334	77.6073	124.194	160.026	177.167
NCU02262	20.9102	14.4235	23.563	12.2935	14.39
NCU02263	135.689	156.802	175.215	136.076	135.058
NCU02264	81.7499	50.5515	77.4503	77.751	88.1024
NCU02265	39.9308	38.7736	43.233	61.9839	87.0675
NCU02267	31.4078	15.1807	24.8769	22.7073	38.2547
NCU02268	30.4717	19.1663	39.3266	31.4269	34.1551
NCU02269	14.9049	42.1065	10.6263	13.4327	18.7603
NCU02270	21.7243	9.84109	21.2854	13.4014	17.2949
NCU02271	2.67572	2.40189	3.37769	1.5146	3.74596
NCU02272	13.3968	20.5536	18.2229	13.8538	11.7476
NCU02273	647.058	187.529	621.781	614.718	842.052
NCU02274	23.7616	189.824	14.626	20.5689	22.6781
NCU02276	27.5528	19.699	29.7766	24.0125	25.8377
NCU02277	18.3108	18.1119	23.0563	27.6797	19.8151
NCU02278	17.668	23.4762	19.2079	20.1353	33.5617
NCU02280	193.563	204.921	196.349	185.957	224.451
NCU02281	27.2757	18.2854	31.6789	28.8142	24.1973
NCU02282	33.3527	45.1867	66.0044	56.1907	42.3787
NCU02283	42.401	27.2991	46.5832	47.0978	46.8166
NCU02284	0.947579	3.93074	0.649533	0.490571	1.06023
NCU02285	3.81792	4.39485	6.64252	9.92524	9.19869
NCU02286	6.24784	6.43619	7.90992	8.96459	5.10548
NCU02287	64.817	7.63458	29.6063	75.1283	167.693
NCU02289	412.599	524.753	601.45	524.478	572.227
NCU02291	21.7551	29.7042	28.9834	36.2595	34.5212
NCU02292	0.979249	0.122637	0.611428	0.510401	1.58586
NCU02293	8.10752	6.68449	6.65349	6.9838	11.8473
NCU02294	20.8707	7.69683	16.86	12.843	27.8683
NCU02295	44.8062	50.0943	58.2254	47.0561	79.6624
NCU02296	6.83408	8.95796	10.1915	11.3701	50.1473
NCU02299	26.4913	27.4548	29.9767	40.075	55.6461
NCU02302	4.19607	3.68458	3.59278	2.38338	4.17976
NCU02303	2.57333	6.45332	5.34218	3.3376	2.06916
NCU02304	12.8353	10.7564	15.3938	11.8105	13.0168
NCU02305	7.345	37.6106	6.10625	9.58104	11.4429
NCU02307	265.711	29.9541	218.096	156.752	167.728
NCU02310	21.2519	20.8201	17.0199	15.877	13.7906
NCU02314	1.91638	0.989681	1.72391	1.98982	1.9611
NCU02315	11.2862	14.7126	12.1095	8.41717	6.74161
NCU02316	20.0936	41.2066	25.1341	35.9909	24.0941
NCU02317	2.74046	0.545885	2.23559	1.70393	2.93653
NCU02318	26.6607	16.2093	28.6593	28.1984	31.0813
NCU02319	82.6032	66.6661	122.616	162.674	117.57
NCU02320	7.44136	7.76414	9.79254	18.8201	10.1383
NCU02321	4.23887	1.4077	4.44173	3.71551	2.60557
NCU02322	16.9062	20.509	23.8815	16.9692	26.5854
NCU02325	43.3794	78.279	23.4675	35.4777	48.9352
NCU02326	2.31086	0.186573	2.71305	1.07846	2.28395
NCU02328	15.2042	22.1579	11.193	23.326	39.9023
NCU02333	58.7934	64.6225	152.846	188.285	139.512
NCU02334	10.366	4.70682	5.51377	4.0504	9.34791
NCU02335	37.8729	15.2302	37.8411	26.5903	44.5412
NCU02336	9.08195	24.8819	18.3009	19.8236	11.953
NCU02337	16.8964	10.7814	19.8132	17.414	25.2473
NCU02338	4.64967	1.39013	4.18888	4.05636	5.80766
NCU02342	35.33	55.8147	27.363	37.4928	17.4804
NCU02343	1771.96	1962.21	391.729	2290.63	127.841
NCU02344	24.0244	3.11514	1.96911	1.3505	1.38035
NCU02345	5.05123	3.76938	4.37928	4.4504	5.084
NCU02347	12.4435	24.2071	18.9014	17.6218	11.8058
NCU02348	5.93792	6.50285	9.68287	5.11679	4.40632
NCU02349	43.9323	19.0426	43.1167	34.6829	32.2167
NCU02351	33.8775	31.4941	57.3491	56.7394	58.7642
NCU02352	12.4898	4.49899	9.04675	9.70735	14.3103
NCU02353	51.7331	35.7881	46.2172	58.2718	79.3435
NCU02354	20.9048	19.8805	28.2575	20.4678	19.2277
NCU02355	24.8326	8.98212	26.6558	15.726	13.8355
NCU02356	12.4377	16.7463	21.8054	33.3551	46.7439
NCU02357	41.3448	65.9022	37.5132	38.7877	48.4847
NCU02358	41.4626	34.7212	59.0586	59.4092	48.1125
NCU02359	8.35377	11.5566	5.81751	6.25875	7.07947
NCU02360	42.8351	16.8455	46.7883	50.8754	60.737
NCU02361	20.283	54.0479	40.98	35.8054	71.3982
NCU02362	19.8986	9.19215	21.5705	24.8035	22.3933
NCU02363	5.63483	1.51856	6.10565	3.65271	7.6098
NCU02364	59.2477	29.4852	52.916	37.6501	69.9892
NCU02366	551.632	346.456	907.704	347.13	608.734
NCU02367	21.0066	20.436	26.7007	20.5586	25.097
NCU02368	37.582	27.1329	45.0167	35.9683	41.7918
NCU02369	2.41846	4.52372	2.57493	2.47556	2.1481
NCU02370	8.41054	9.58622	10.0437	7.65293	8.21374
NCU02371	17.9721	18.8564	24.1049	20.0895	20.8487
NCU02372	16.6403	15.7631	14.0338	15.1418	26.1323
NCU02373	283.296	268.045	237.003	247.008	337.563
NCU02374	60.5657	92.6417	108.646	74.5407	69.9832
NCU02375	18.553	22.4002	28.7338	22.9366	25.0874
NCU02376	52.9724	33.6442	58.8939	54.2941	55.2162
NCU02378	7.99537	13.3012	13.087	20.5109	12.5919
NCU02379	17.8883	12.7785	16.9742	15.9683	22.0195
NCU02380	74.7108	101.301	70.5799	68.4981	51.3565
NCU02381	65.0517	44.2947	99.3032	97.3492	71.1281
NCU02382	48.7545	23.8816	58.9895	47.9184	40.1808
NCU02383	2.13021	0.421481	2.38547	2.34931	1.60913
NCU02385	32.8516	30.5736	36.1311	35.8964	40.5745
NCU02386	13.4174	8.42127	16.6014	15.4826	19.1541
NCU02387	27.4768	24.8935	29.6182	24.6131	27.7004
NCU02388	13.2527	15.8737	14.6602	10.5203	19.0167
NCU02389	9.7769	5.83231	12.2761	9.30228	13.0913
NCU02390	31.8216	49.614	38.0487	37.7293	197.874
NCU02391	84.9518	60.8783	80.2171	59.5004	79.9484
NCU02393	231.157	280.806	299.441	264.29	209.566
NCU02394	19.2014	12.9777	22.7336	26.9522	27.7352
NCU02395	40.4951	25.2103	62.845	52.6653	55.5075
NCU02396	3.71159	4.61861	8.76609	6.51297	4.66419
NCU02397	69.02	90.2838	137.985	143	172.423
NCU02398	15.4607	10.1041	27.7365	36.9614	33.3022
NCU02399	75.0555	68.0223	71.5883	105.482	139.168
NCU02400	33.9802	19.159	43.2106	26.2701	126.324
NCU02401	4.36913	3.08544	8.50164	7.6871	5.42082
NCU02402	22.3827	24.2942	35.315	21.7457	14.2902
NCU02403	41.391	36.4999	73.8623	62.4764	143.411
NCU02404	198.905	171.303	230.017	157.002	315.901
NCU02405	71.2916	60.2484	94.2674	92.4516	71.1307
NCU02406	6.97632	11.9782	9.79784	9.42571	10.144
NCU02407	101.234	89.9825	102.896	82.7111	115.528
NCU02408	25.7761	27.3795	40.283	44.1673	52.7886
NCU02409	28.4719	16.9216	33.6013	31.1539	33.061
NCU02410	29.1888	8.35379	30.5077	19.8833	30.1905
NCU02411	19.3063	18.4469	20.7984	15.0627	14.0535
NCU02412	15.464	6.11165	13.3006	9.1391	14.3045
NCU02413	29.7942	17.5813	31.3461	24.1695	40.8777
NCU02414	44.9102	33.8816	44.4515	43.8076	43.3168
NCU02415	18.6436	14.8707	25.1095	20.8512	20.9291
NCU02416	29.7012	18.18	31.1795	21.2542	29.2649
NCU02417	22.9852	13.7977	22.6251	15.6256	20.1786
NCU02418	38.239	29.083	53.1003	38.28	42.8469
NCU02419	25.8023	41.287	26.8445	28.1917	40.3685
NCU02420	29.2781	18.8503	37.28	31.3716	31.806
NCU02421	40.365	21.0855	32.3863	39.4223	48.0008
NCU02422	42.3611	16.5226	41.9316	43.0514	49.7841
NCU02423	57.3466	91.8836	48.0542	40.9475	32.5226
NCU02424	127.545	53.8519	146.138	91.3462	80.7428
NCU02425	36.251	28.0749	48.3403	34.8585	40.5181
NCU02428	19.1633	8.32499	18.8418	15.3931	24.0381
NCU02429	14.8111	11.4756	14.8385	11.6083	22.5905
NCU02430	7.31975	56.3407	10.2944	8.09976	9.41343
NCU02431	40.1312	35.763	51.1662	52.459	63.7558
NCU02432	18.0033	11.7003	17.476	15.5735	33.0817
NCU02433	51.3928	33.8305	57.0668	37.2587	63.4439
NCU02434	27.2273	26.1603	30.7783	19.6288	26.4828
NCU02435	1597.63	1872.57	3119.22	1311.85	655.185
NCU02437	1322.98	1001.9	1659.38	587.024	583.869
NCU02438	101.249	101.147	82.24	71.9527	91.4209
NCU02450	14.8571	42.069	14.7349	10.7067	13.8794
NCU02452	51.8962	15.4893	56.0571	50.7698	50.8128
NCU02453	239.195	237.955	301.319	320.939	226.167
NCU02455	765.775	210.705	342.736	188.496	346.831
NCU02456	7.6646	3.49762	9.29639	8.61208	8.57733
NCU02457	24.1382	13.9098	34.2259	20.4729	16.3054
NCU02458	34.8351	18.1631	50.1487	43.7846	33.4891
NCU02459	115.391	65.5059	145.001	123.128	135.367
NCU02460	66.5838	52.7752	69.9108	70.7318	60.5998
NCU02463	96.5784	37.96	80.7387	75.0204	136.715
NCU02464	136.556	228.569	158.509	161.457	118.127
NCU02466	27.5317	18.8197	33.404	38.7417	36.7736
NCU02467	14.186	12.8538	13.5809	8.90541	13.1296
NCU02468	41.4472	66.3819	29.9087	28.9282	19.5511
NCU02470	17.3683	35.7532	19.5144	23.4534	15.7502
NCU02472	154.487	141.814	130.829	129.171	165.32
NCU02473	24.6259	42.3671	33.4586	21.2597	24.2927
NCU02474	35.972	40.4622	83.1735	41.9235	71.2316
NCU02475	7.71456	28.5096	6.60274	23.686	72.0267
NCU02476	3.74552	2.58417	5.48445	3.66647	3.49243
NCU02477	3.54664	23.8016	5.07244	3.16255	4.51234
NCU02478	5.53329	9.87623	3.72865	4.21832	5.70127
NCU02479	89.2656	89.3634	100.728	116.533	59.244
NCU02480	184.509	299.068	203.116	232.807	150.36
NCU02481	36.9957	18.1521	46.3317	18.2083	27.3253
NCU02482	26.5966	14.1678	31.2289	20.9074	24.4692
NCU02483	3.86358	0.551757	1.19298	0.956809	3.68297
NCU02485	45.1286	11.9413	10.3668	8.92862	2.61884
NCU02490	81.9203	39.4978	72.4324	29.9838	46.2261
NCU02491	47.5531	29.4842	64.6193	57.8136	73.0981
NCU02492	35.9901	17.1739	47.7778	52.7813	46.5421
NCU02493	148.108	138.147	186.684	162.025	170.892
NCU02494	2.54684	4.71075	1.88358	1.59057	2.2559
NCU02495	19.6809	12.1503	17.7595	15.6007	18.2282
NCU02496	11.5125	13.1565	16.2989	15.5928	12.1997
NCU02497	1.26187	6.65941	1.15585	1.00649	1.68542
NCU02498	17.6362	17.0025	26.8626	24.0536	19.5738
NCU02499	8.20993	10.3248	8.2339	6.67095	10.2137
NCU02500	305.786	239.92	728.881	952.769	175.089
NCU02502	3.42049	2.34092	4.46596	3.67885	5.71907
NCU02504	5.76129	19.6655	8.04005	17.9278	32.6561
NCU02505	159.611	281.668	160.745	200.509	161.785
NCU02507	82.0582	41.7188	38.753	44.758	71.9475
NCU02508	70.2074	76.2803	77.1048	45.8777	62.3272
NCU02509	91.5788	365.578	30.3404	59.0661	113.951
NCU02510	79.8188	133.784	101.698	108.865	71.2512
NCU02511	3.49712	13.3691	5.41601	5.43023	4.3564
NCU02512	39.3381	72.395	93.5643	52.3601	38.1935
NCU02513	87.8346	88.487	151.543	118.997	116.47
NCU02514	403.081	556.68	429.304	353.486	470.448
NCU02515	61.7485	37.8519	104.437	86.73	58.6907
NCU02519	29.594	26.5764	37.5484	32.7715	21.0114
NCU02520	71.4224	96.7724	100.159	92.6675	60.7672
NCU02521	5.737	1.78891	8.81103	10.6325	6.76576
NCU02522	21.7143	4.94863	25.7039	25.8738	28.4738
NCU02523	34.5404	9.13957	36.6865	27.585	28.9917
NCU02524	7.38398	17.9782	11.1339	14.303	5.073
NCU02525	11.0894	5.21191	16.0262	12.1143	11.8741
NCU02526	436.206	351.072	633.407	746.235	796.997
NCU02527	1.08428	1.17221	1.75328	1.2603	1.2652
NCU02528	9.20658	23.3527	7.91768	8.43897	8.16003
NCU02529	5.26725	6.10727	6.37644	3.75488	7.16036
NCU02530	4.48372	19.3948	5.85959	6.37443	5.79463
NCU02531	11.5079	7.01968	11.1943	10.9423	13.2975
NCU02532	23.1752	26.481	26.3544	21.5419	27.6924
NCU02533	3.71334	13.443	1.44196	1.01111	4.90926
NCU02534	143.292	173.719	100.293	106.026	140.572
NCU02535	2.6315	1.234	3.12241	3.32247	2.62033
NCU02536	10.5524	7.94281	12.3633	10.3987	11.8401
NCU02538	49.6322	50.6869	49.1492	34.1707	43.405
NCU02539	14.6954	22.4026	20.3114	11.2926	12.9919
NCU02540	46.1087	16.7582	107.229	81.3018	85.3048
NCU02541	149.436	57.3387	117.185	71.4813	77.0994
NCU02542	215.608	178.083	198.316	198.96	247.251
NCU02543	15.0355	5.15111	19.5285	12.3932	12.5574
NCU02544	45.7359	21.0358	70.2577	49.9534	55.1886
NCU02546	1.99359	15.7972	1.65975	1.15702	3.0925
NCU02547	104.362	87.928	80.8756	82.7011	106.67
NCU02548	44.3976	53.8167	69.2705	57.6554	52.6905
NCU02549	96.1738	289.522	139.07	157.251	277.767
NCU02550	38.2112	16.5913	43.4262	34.4927	37.1021
NCU02552	57.2488	26.8622	66.5033	49.3339	95.6955
NCU02553	13.7424	17.1329	19.6154	13.2587	17.2881
NCU02554	10.3701	10.1913	18.4437	15.4697	9.42048
NCU02555	22.0837	17.5301	20.9242	14.4055	22.3762
NCU02556	25.5945	19.7727	34.7657	31.9954	27.7168
NCU02558	11.0067	10.5691	15.1414	14.7306	10.6408
NCU02559	13.8664	14.9749	16.7976	25.1343	32.6964
NCU02560	14.0614	8.50216	12.8767	33.9501	55.8452
NCU02561	20.8421	32.0623	28.7238	20.3546	19.6924
NCU02563	39.7962	29.3038	39.4809	43.6996	51.7837
NCU02564	10.1348	13.2914	14.7971	11.0074	12.3193
NCU02565	19.1794	15.6263	23.7891	22.4449	18.7782
NCU02566	47.1552	35.0151	50.7131	87.0762	73.0989
NCU02567	13.8016	7.98557	18.8636	17.1077	14.9544
NCU02568	8.11978	3.20026	11.6617	10.7766	10.0924
NCU02570	10.251	14.5994	15.7305	15.8658	9.05102
NCU02571	45.8257	58.7095	40.38	28.4956	32.0749
NCU02572	16.6632	20.7809	15.9281	13.202	17.2537
NCU02573	29.3603	46.8944	44.7873	54.1506	72.7197
NCU02576	46.5203	54.3478	84.179	91.9605	107.294
NCU02577	19.7625	11.7074	18.6302	17.1315	23.6081
NCU02578	27.9696	30.5564	47.2855	35.6783	27.0626
NCU02579	156.767	19.8372	93.8371	156.388	400.487
NCU02580	582.935	162.49	648.824	819.138	1094.7
NCU02582	46.925	21.6852	54.0188	46.7095	86.8811
NCU02583	73.8539	70.9889	97.4387	101.416	100.853
NCU02584	3.33419	1.08006	3.57155	3.25535	3.10367
NCU02585	13.9943	18.5739	17.5198	15.0911	14.5242
NCU02586	17.8342	22.4729	25.7002	23.0109	18.4851
NCU02587	9.45878	7.94389	4.97369	4.03188	10.4116
NCU02588	46.6723	49.5964	42.4704	24.7834	39.8612
NCU02589	7.17116	11.462	6.12632	5.9839	10.3752
NCU02590	12.4766	31.6984	15.5029	18.9021	10.6925
NCU02591	33.3026	21.5666	38.2397	32.3651	53.2819
NCU02592	25.6573	27.6095	33.3389	33.8165	35.0271
NCU02594	5.06149	2.831	7.38785	7.98319	3.72129
NCU02595	81.7414	74.2424	94.6526	87.9936	75.2464
NCU02596	159.855	191.699	319.868	281.682	192.395
NCU02597	35.3237	14.207	20.567	19.4608	30.9639
NCU02598	11.6981	10.8634	13.6738	12.7078	14.5806
NCU02599	192.472	153.958	208.976	172.747	234.053
NCU02600	3.41645	0.402543	1.37029	1.92992	1.33095
NCU02601	11.9638	7.73775	16.1673	14.9778	17.9343
NCU02602	61.0262	109.906	61.8257	76.918	112.092
NCU02603	20.0851	18.0144	20.8346	29.604	43.565
NCU02604	2.64189	9.45869	2.86164	2.83605	3.75727
NCU02605	57.5657	49.5583	36.3823	23.1555	51.0132
NCU02606	75.2629	98.6204	107.053	101.565	59.8455
[truncated: 5,768 more rows]

## Sheet: P2
FUNCTIONAL CATEGORY	abs SET	rel SET	genes SET	abs GENOME	rel GENOME	rel SET/rel GENOME	P-VALUE
12.01.01 ribosomal proteins	69	50	NCU07408 NCU06892 NCU07830 NCU06431 NCU01317 NCU07562 NCU00315 NCU08502 NCU00706 NCU06047 NCU01949 NCU08990 NCU06743 NCU02509 NCU06843 NCU01948 NCU07826 NCU03806 NCU00258 NCU08620 NCU03635 NCU00489 NCU00979 NCU02905 NCU06210 NCU21825 NCU05554 NCU07857 NCU08963 NCU00971 NCU01452 NCU03393 NCU02707 NCU04779 NCU20991 NCU04552 NCU04553 NCU08627 NCU08344 NCU01221 NCU03150 NCU06226 NCU01776 NCU08960 NCU…	152	1.51	33.1126	3.56627e-94
12.04 translation	69	50	NCU00489 NCU01948 NCU06226 NCU07408 NCU06035 NCU06743 NCU07826 NCU03738 NCU06431 NCU03302 NCU07562 NCU08620 NCU02509 NCU07830 NCU02905 NCU08963 NCU09475 NCU01552 NCU06432 NCU01317 NCU08990 NCU01949 NCU05554 NCU06892 NCU03806 NCU20802 NCU21825 NCU00413 NCU03150 NCU03988 NCU08960 NCU02744 NCU03038 NCU03393 NCU04553 NCU06047 NCU06843 NCU07857 NCU08500 NCU10498 NCU01827 NCU03703 NCU20991 NCU09476 NCU…	188	1.86	26.8817	4.04834e-86
12.01 ribosome biogenesis	70	50.7	NCU00618 NCU04779 NCU06431 NCU09475 NCU07826 NCU08627 NCU01552 NCU06843 NCU08500 NCU08502 NCU03988 NCU07562 NCU20754 NCU00413 NCU06210 NCU03393 NCU00979 NCU03738 NCU08960 NCU06047 NCU08964 NCU08620 NCU20991 NCU07857 NCU00315 NCU02744 NCU06743 NCU04331 NCU01776 NCU03757 NCU04553 NCU05810 NCU07408 NCU03038 NCU03302 NCU00258 NCU01452 NCU21825 NCU08344 NCU03102 NCU03635 NCU00971 NCU02905 NCU05554 NCU…	221	2.19	23.1507	3.92801e-82
12 PROTEIN SYNTHESIS	74	53.6	NCU03738 NCU21825 NCU04553 NCU08964 NCU05554 NCU00413 NCU00706 NCU06226 NCU08627 NCU04331 NCU01827 NCU03150 NCU03302 NCU06431 NCU08960 NCU08990 NCU06843 NCU10498 NCU00618 NCU01452 NCU06035 NCU06432 NCU01948 NCU00634 NCU07408 NCU00979 NCU02181 NCU00489 NCU07826 NCU00258 NCU01221 NCU03988 NCU06743 NCU00971 NCU03635 NCU01949 NCU03757 NCU07562 NCU09109 NCU07922 NCU01552 NCU02905 NCU03806 NCU07830 NCU…	362	3.59	14.9304	1.50453e-71
16.01 protein binding	72	52.1	NCU08502 NCU08500 NCU08344 NCU00706 NCU02181 NCU03806 NCU07826 NCU09475 NCU01452 NCU01949 NCU06226 NCU02905 NCU07857 NCU09109 NCU03150 NCU08620 NCU03635 NCU03988 NCU08963 NCU00413 NCU06743 NCU07830 NCU00489 NCU03102 NCU00971 NCU01221 NCU04202 NCU07420 NCU20802 NCU03703 NCU09476 NCU09705 NCU10498 NCU06652 NCU20754 NCU06843 NCU05274 NCU04779 NCU06210 NCU21825 NCU07562 NCU00979 NCU01317 NCU08990 NCU…	678	6.73	7.74146	3.978e-48
16 PROTEIN WITH BINDING FUNCTION OR COFACTOR REQUIREMENT (structural or catalytic)	89	64.4	NCU06652 NCU00891 NCU02707 NCU02744 NCU06743 NCU04779 NCU21825 NCU02075 NCU03038 NCU03102 NCU06226 NCU05159 NCU02181 NCU00489 NCU03635 NCU06843 NCU07562 NCU07420 NCU07857 NCU08620 NCU02905 NCU08189 NCU02509 NCU03703 NCU01552 NCU08964 NCU06431 NCU09109 NCU08502 NCU00618 NCU00258 NCU04553 NCU01776 NCU09476 NCU01452 NCU04331 NCU03738 NCU01328 NCU08411 NCU03118 NCU08344 NCU08990 NCU06432 NCU04720 NCU…	1375	13.6	4.73529	7.76959e-44
16.03.03 RNA binding	20	14.4	NCU02181 NCU04331 NCU06226 NCU07830 NCU03806 NCU01221 NCU07420 NCU00634 NCU03038 NCU02509 NCU01776 NCU05554 NCU03703 NCU03150 NCU01317 NCU02707 NCU01949 NCU02744 NCU03302 NCU20802	165	1.63	8.83436	7.09494e-14
01.05 C-compound and carbohydrate metabolism	32	23.1	NCU01906 NCU09652 NCU01866 NCU02193 NCU01704 NCU08384 NCU10107 NCU10106 NCU00130 NCU04870 NCU20768 NCU05751 NCU00891 NCU05159 NCU20953 NCU04401 NCU03813 NCU09582 NCU08164 NCU01328 NCU09923 NCU06652 NCU00225 NCU09705 NCU11353 NCU04400 NCU20467 NCU08189 NCU09175 NCU05548 NCU08755 NCU05133	759	7.54	3.06366	6.52036e-09
16.03 nucleic acid binding	21	15.2	NCU01949 NCU01317 NCU03102 NCU02509 NCU02707 NCU04331 NCU00634 NCU03806 NCU01221 NCU03302 NCU03703 NCU05554 NCU03150 NCU20802 NCU03038 NCU07420 NCU06226 NCU01776 NCU02181 NCU02744 NCU07830	346	3.43	4.43149	8.66069e-09
01.05.03 polysaccharide metabolism	14	10.1	NCU20467 NCU05159 NCU01906 NCU09175 NCU00130 NCU04870 NCU05751 NCU20768 NCU08755 NCU08384 NCU09582 NCU09652 NCU09923 NCU08189	169	1.67	6.0479	7.14393e-08
01 METABOLISM	49	35.5	NCU02193 NCU01704 NCU09923 NCU01328 NCU01195 NCU09705 NCU10106 NCU00130 NCU05274 NCU07922 NCU20467 NCU05810 NCU00891 NCU11353 NCU03813 NCU09175 NCU10110 NCU04400 NCU05751 NCU08189 NCU08409 NCU08755 NCU04720 NCU08164 NCU05133 NCU20355 NCU07224 NCU08411 NCU04202 NCU06652 NCU20953 NCU02075 NCU01906 NCU07143 NCU20063 NCU04870 NCU05548 NCU09652 NCU00225 NCU09582 NCU10107 NCU07420 NCU06724 NCU03118 NCU…	1740	17.2	2.06395	1.78406e-07
12.04.02 translation elongation	5	3.62	NCU00979 NCU07922 NCU08960 NCU07408 NCU06035	19	0.18	20.1111	4.48727e-06
01.05.02 sugar, glucoside, polyol and carboxylate metabolism	11	7.97	NCU08755 NCU08384 NCU01328 NCU09705 NCU11353 NCU00130 NCU09652 NCU00891 NCU01906 NCU20953 NCU05133	156	1.54	5.17532	9.22679e-06
01.05.02.07 sugar, glucoside, polyol and carboxylate catabolism	9	6.52	NCU01906 NCU00130 NCU09652 NCU00891 NCU11353 NCU08384 NCU20953 NCU01328 NCU08755	124	1.23	5.30081	4.92445e-05
12.07 translational control	6	4.34	NCU07420 NCU06047 NCU08963 NCU01552 NCU03102 NCU01949	54	0.53	8.18868	8.95611e-05
02.16 fermentation	6	4.34	NCU08384 NCU01906 NCU02193 NCU03813 NCU06652 NCU05810	56	0.55	7.89091	0.000110093
16.21 complex cofactor/cosubstrate/vitamine binding	10	7.24	NCU01195 NCU01906 NCU01328 NCU03118 NCU00891 NCU04720 NCU08384 NCU08411 NCU05133 NCU08409	206	2.04	3.54902	0.000525993
02.07.03 pentose-phosphate pathway non oxidative branch	2	1.44	NCU10107 NCU01328	5	0.04	36	0.00181615
16.17.09 heavy metal binding (Cu, Fe, Zn)	8	5.79	NCU06652 NCU20802 NCU07562 NCU04553 NCU04720 NCU00891 NCU20991 NCU00618	167	1.65	3.50909	0.0020735
32.10 degradation / modification of foreign (exogenous) compounds	3	2.17	NCU20953 NCU01906 NCU08384	20	0.19	11.4211	0.00242273
16.21.07 NAD/NADP binding	6	4.34	NCU05133 NCU00891 NCU03118 NCU01906 NCU08384 NCU01195	103	1.02	4.2549	0.00286853
01.01.03.02.01 biosynthesis of glutamate	3	2.17	NCU01195 NCU08411 NCU06724	22	0.21	10.3333	0.00320799
02 ENERGY	12	8.69	NCU02193 NCU05133 NCU05810 NCU10107 NCU08384 NCU01328 NCU01195 NCU06652 NCU04401 NCU00130 NCU03813 NCU01906	375	3.72	2.33602	0.00534937
16.17 metal binding	9	6.52	NCU07562 NCU04553 NCU06652 NCU20802 NCU20991 NCU00618 NCU04202 NCU00891 NCU04720	262	2.6	2.50769	0.0099143
01.07 metabolism of vitamins, cofactors, and prosthetic groups	7	5.07	NCU08384 NCU03813 NCU01704 NCU08164 NCU06652 NCU00891 NCU01906	176	1.74	2.91379	0.0105699
02.01 glycolysis and gluconeogenesis	4	2.89	NCU04401 NCU05133 NCU01328 NCU00130	63	0.62	4.66129	0.0107887
02.07 pentose-phosphate pathway	3	2.17	NCU01328 NCU10107 NCU04401	34	0.33	6.57576	0.0110613
01.01 amino acid metabolism	10	7.24	NCU08411 NCU01195 NCU10110 NCU07143 NCU05548 NCU08409 NCU03118 NCU01328 NCU05810 NCU06724	319	3.16	2.29114	0.0122704
01.01.03.02 metabolism of glutamate	3	2.17	NCU06724 NCU08411 NCU01195	36	0.35	6.2	0.0129391
32.01.05 heat shock response	3	2.17	NCU08384 NCU02075 NCU01906	39	0.38	5.71053	0.0160772
01.01.03.01 metabolism of glutamine	2	1.44	NCU06724 NCU01195	15	0.14	10.2857	0.0174323
01.20.17.09 metabolism of alkaloids	2	1.44	NCU08384 NCU01906	15	0.14	10.2857	0.0174323
01.01.03.02.02 degradation of glutamate	2	1.44	NCU01195 NCU08411	16	0.15	9.6	0.0197456
16.05 polysaccharide binding	2	1.44	NCU05159 NCU08189	16	0.15	9.6	0.0197456
01.03.16 polynucleotide degradation	3	2.17	NCU05274 NCU04202 NCU07420	44	0.43	5.04651	0.0221769
01.20.01 metabolism of primary metabolic sugar derivatives	2	1.44	NCU00891 NCU00130	17	0.16	9	0.0221798
12.04.01 translation initiation	3	2.17	NCU07922 NCU07420 NCU05274	50	0.49	4.42857	0.03094
01.05.06.07 C-2 compound and organic acid catabolism	2	1.44	NCU06652 NCU02193	21	0.2	7.2	0.0330521
01.05.06 C-2 compound and organic acid metabolism	2	1.44	NCU06652 NCU02193	22	0.21	6.85714	0.0360365
32.07.03 detoxification by modification	2	1.44	NCU03013 NCU07224	23	0.22	6.54545	0.0391207
01.20.01.01 metabolism of secondary monosaccharides	1	0.72	NCU00891	3	0.02	36	0.0405713
01.20.01.07 metabolism of glycosides	1	0.72	NCU00130	3	0.02	36	0.0405713
01.05.02.04 sugar, glucoside, polyol and carboxylate anabolism	3	2.17	NCU01328 NCU00891 NCU00130	59	0.58	3.74138	0.0469942
20.09.01 nuclear transport	3	2.17	NCU07420 NCU02075 NCU00971	62	0.61	3.55738	0.0530978
01.01.03.03.02 degradation of proline	1	0.72	NCU01195	4	0.03	24	0.0537285
01.01.06.02.01 biosynthesis of asparagine	1	0.72	NCU08411	4	0.03	24	0.0537285
01.07.04 utilization of vitamins, cofactors, and prosthetic groups	1	0.72	NCU01704	4	0.03	24	0.0537285
01.25.07 extracellular ester compound degradation	1	0.72	NCU04870	4	0.03	24	0.0537285
01.01.03 assimilation of ammonia, metabolism of the glutamate group	3	2.17	NCU01195 NCU08411 NCU06724	64	0.63	3.44444	0.0573686
16.21.17 pyridoxal phosphate binding	2	1.44	NCU08411 NCU08409	29	0.28	5.14286	0.0595438
42.01 cell wall	5	3.62	NCU01195 NCU02075 NCU07922 NCU20467 NCU09923	156	1.54	2.35065	0.0632216
01.01.03.01.01 biosynthesis of glutamine	1	0.72	NCU06724	5	0.04	18	0.0667066
01.03.16.03 DNA degradation	1	0.72	NCU04202	5	0.04	18	0.0667066
16.21.11 thiamine pyrophosphate binding	1	0.72	NCU01328	5	0.04	18	0.0667066
40.02.03 activity of intercellular mediators	1	0.72	NCU01704	5	0.04	18	0.0667066
01.01.06.01.01 biosynthesis of aspartate	1	0.72	NCU08411	6	0.05	14.4	0.0795079
01.01.06.01.02 degradation of aspartate	1	0.72	NCU08411	6	0.05	14.4	0.0795079
01.01.06.02 metabolism of asparagine	1	0.72	NCU08411	6	0.05	14.4	0.0795079
01.05.07 C-3 compound metabolism	1	0.72	NCU04400	6	0.05	14.4	0.0795079
11.04.03.01.10 regulation of splicing	1	0.72	NCU08963	6	0.05	14.4	0.0795079
30.01.05.05.03 trimeric G-protein mediated signal transduction	1	0.72	NCU05810	6	0.05	14.4	0.0795079
01.06.06 isoprenoid metabolism	3	2.17	NCU08384 NCU01328 NCU01906	74	0.73	2.9726	0.0810266
34.11.03.13 osmosensing and response	2	1.44	NCU08384 NCU01906	35	0.34	4.23529	0.0827964
01.20.17 metabolism of secondary products derived from primary amino acids	2	1.44	NCU08384 NCU01906	37	0.36	4	0.091075
01.05.11 aromate metabolism	2	1.44	NCU05548 NCU01704	40	0.39	3.69231	0.10392
01.01.03.05.02 degradation of arginine	1	0.72	NCU01195	8	0.07	10.2857	0.10459
11.04.03.03 5'-end processing	1	0.72	NCU07420	8	0.07	10.2857	0.10459
20.09.05 non-vesicular ER transport	1	0.72	NCU02075	8	0.07	10.2857	0.10459
32 CELL RESCUE, DEFENSE AND VIRULENCE	12	8.69	NCU08384 NCU04400 NCU00489 NCU01320 NCU00130 NCU07224 NCU01906 NCU02075 NCU03013 NCU04870 NCU06652 NCU20953	594	5.9	1.47288	0.114397
01.01.03.01.02 degradation of glutamine	1	0.72	NCU01195	9	0.08	9	0.116875
01.01.06.06.01.03 aminoadipic acid pathway	1	0.72	NCU03118	9	0.08	9	0.116875
01.01.11.03.02 degradation of valine	1	0.72	NCU10110	9	0.08	9	0.116875
01.05.11.04 aromate anabolism	1	0.72	NCU05548	9	0.08	9	0.116875
01.20 secondary metabolism	6	4.34	NCU01906 NCU05548 NCU08384 NCU01704 NCU00891 NCU00130	245	2.43	1.78601	0.120364
01.01.06.01 metabolism of aspartate	1	0.72	NCU08411	10	0.09	8	0.128993
01.05.05.07 C-1 compound catabolism	1	0.72	NCU03813	10	0.09	8	0.128993
32.07.07.03 glutathione conjugation reaction	1	0.72	NCU01320	10	0.09	8	0.128993
01.06.06.11 tetracyclic and pentacyclic triterpenes (cholesterin, steroids and hopanoids) metabolism	2	1.44	NCU01906 NCU08384	50	0.49	2.93878	0.149728
01.02 nitrogen, sulfur and selenium metabolism	4	2.89	NCU01195 NCU08411 NCU06724 NCU04720	150	1.49	1.9396	0.150643
01.01.03.03 metabolism of proline	1	0.72	NCU01195	12	0.11	6.54545	0.152736
01.01.06.06.02 degradation of lysine	1	0.72	NCU03118	12	0.11	6.54545	0.152736
01.05.02.01 nucleotide-sugar metabolism	1	0.72	NCU05133	12	0.11	6.54545	0.152736
01.05.05 C-1 compound metabolism	1	0.72	NCU03813	12	0.11	6.54545	0.152736
34.11.01 photoperception and response	1	0.72	NCU08164	12	0.11	6.54545	0.152736
32.01.03 osmotic and salt stress response	2	1.44	NCU08384 NCU01906	53	0.52	2.76923	0.164162
01.01.09.06.01 biosynthesis of tryptophan	1	0.72	NCU08409	13	0.12	6	0.164366
32.10.07 degradation / modification of foreign (exogenous) polysaccharides	1	0.72	NCU20953	13	0.12	6	0.164366
40.10.02.01 anti-apoptosis	1	0.72	NCU02075	13	0.12	6	0.164366
01.03.04.03 pyrimidine nucleotide/nucleoside/nucleobase anabolism	1	0.72	NCU04202	14	0.13	5.53846	0.175837
32.07 detoxification	4	2.89	NCU07224 NCU06652 NCU03013 NCU01320	161	1.59	1.81761	0.179691
01.06 lipid, fatty acid and isoprenoid metabolism	8	5.79	NCU01906 NCU08164 NCU07224 NCU04400 NCU01328 NCU20063 NCU20355 NCU08384	400	3.97	1.45844	0.183362
40.10.02 apoptosis (type I programmed cell death)	2	1.44	NCU02075 NCU05274	57	0.56	2.57143	0.183766
18.02.01.01.01 GTPase activator (GAP)	1	0.72	NCU06035	15	0.14	5.14286	0.187152
01.01.06.06.01 biosynthesis of lysine	1	0.72	NCU03118	16	0.15	4.8	0.198312
43.03 animal cell type differentiation	1	0.72	NCU02075	16	0.15	4.8	0.198312
32.01 stress response	7	5.07	NCU03013 NCU01906 NCU08384 NCU04400 NCU01320 NCU00489 NCU02075	351	3.48	1.4569	0.206688
16.19.03 ATP binding	6	4.34	NCU04400 NCU07420 NCU02075 NCU07922 NCU04202 NCU11353	292	2.9	1.49655	0.211922
40.10 cell death	2	1.44	NCU02075 NCU05274	63	0.62	2.32258	0.213741
01.01.13 regulation of amino acid metabolism	1	0.72	NCU05810	18	0.17	4.23529	0.220178
01.01.11.03 metabolism of valine	1	0.72	NCU10110	19	0.18	4	0.230888
14.07.05 modification by ubiquitination, deubiquitination	2	1.44	NCU04553 NCU20991	67	0.66	2.18182	0.233975
01.01.03.05 metabolism of arginine	1	0.72	NCU01195	20	0.19	3.78947	0.241453
01.20.15 metabolism of derivatives of dehydroquinic acid, shikimic acid and chorismic acid	1	0.72	NCU05548	21	0.2	3.6	0.251873
34.11.09 temperature perception and response	1	0.72	NCU02075	21	0.2	3.6	0.251873
41.01.01 mating (fertilization)	1	0.72	NCU02075	21	0.2	3.6	0.251873
34.07 cell adhesion	1	0.72	NCU04202	22	0.21	3.42857	0.26215
01.01.06 metabolism of the aspartate family	2	1.44	NCU08411 NCU03118	75	0.74	1.94595	0.274704
02.16.01 alcohol fermentation	1	0.72	NCU02193	24	0.23	3.13043	0.282288
11.04.01 rRNA processing	3	2.17	NCU07420 NCU02181 NCU08963	139	1.38	1.57246	0.297407
16.19 nucleotide/nucleoside/nucleobase binding	7	5.07	NCU07420 NCU04202 NCU06035 NCU11353 NCU04400 NCU07922 NCU02075	397	3.94	1.2868	0.30253
01.01.06.06 metabolism of lysine	1	0.72	NCU03118	27	0.26	2.76923	0.311475
01.03.16.01 RNA degradation	1	0.72	NCU07420	27	0.26	2.76923	0.311475
01.01.09.06 metabolism of tryptophan	1	0.72	NCU08409	28	0.27	2.66667	0.320939
34.11 cellular sensing and response to external stimulus	5	3.62	NCU08384 NCU02075 NCU08164 NCU01452 NCU01906	277	2.75	1.31636	0.330795
16.07 structural protein binding	1	0.72	NCU07408	30	0.29	2.48276	0.339483
01.03.01.03 purine nucleotide/nucleoside/nucleobase anabolism	1	0.72	NCU04202	31	0.3	2.4	0.348566
11.04.02 tRNA processing	1	0.72	NCU07420	31	0.3	2.4	0.348566
32.07.07 oxygen and radical detoxification	1	0.72	NCU01320	31	0.3	2.4	0.348566
14.13.01.01 proteasomal degradation (ubiquitin/proteasomal pathway)	2	1.44	NCU04553 NCU20991	91	0.9	1.6	0.355484
14.07.04 modification by acetylation, deacetylation	1	0.72	NCU05810	32	0.31	2.32258	0.357524
20.01.21 RNA transport	1	0.72	NCU07420	32	0.31	2.32258	0.357524
01.04 phosphate metabolism	5	3.62	NCU04400 NCU02075 NCU04202 NCU07922 NCU11353	287	2.85	1.27018	0.358063
01.05.25 regulation of C-compound and carbohydrate metabolism	2	1.44	NCU05133 NCU00225	93	0.92	1.56522	0.365397
32.05.03 defense related proteins	1	0.72	NCU00130	33	0.32	2.25	0.36636
14.10 assembly of protein complexes	3	2.17	NCU08964 NCU03393 NCU02075	165	1.63	1.33129	0.394906
01.25 extracellular metabolism	1	0.72	NCU04870	40	0.39	1.84615	0.424925
02.10 tricarboxylic-acid pathway (citrate cycle, Krebs cycle, TCA cycle)	1	0.72	NCU01195	40	0.39	1.84615	0.424925
42.10 nucleus	2	1.44	NCU02075 NCU04202	110	1.09	1.3211	0.446948
01.01.09 metabolism of the cysteine - aromatic group	2	1.44	NCU05548 NCU08409	113	1.12	1.28571	0.460746
41 DEVELOPMENT (Systemic)	1	0.72	NCU02075	45	0.44	1.63636	0.463435
41.01 fungal/microorganismic development	1	0.72	NCU02075	45	0.44	1.63636	0.463435
01.01.11 metabolism of the pyruvate family (alanine, isoleucine, leucine, valine) and D-alanine	1	0.72	NCU10110	46	0.45	1.6	0.470824
20.01.10 protein transport	2	1.44	NCU02075 NCU00971	118	1.17	1.23077	0.483295
16.17.07 magnesium binding	1	0.72	NCU04202	48	0.47	1.53191	0.4853
01.03.04 pyrimidine nucleotide/nucleoside/nucleobase metabolism	1	0.72	NCU04202	49	0.48	1.5	0.492391
10.01.05.03 DNA recombination	1	0.72	NCU07420	50	0.49	1.46939	0.499384
16.21.05 FAD/FMN binding	1	0.72	NCU04720	50	0.49	1.46939	0.499384
32.01.09 DNA damage response	1	0.72	NCU00489	50	0.49	1.46939	0.499384
32.01.07 unfolded protein response (e.g. ER quality control)	1	0.72	NCU02075	52	0.51	1.41176	0.513084
14.13.01 cytoplasmic and nuclear protein degradation	2	1.44	NCU04553 NCU20991	127	1.26	1.14286	0.522395
10.01.02 DNA topology	1	0.72	NCU07420	54	0.53	1.35849	0.526413
30.01.05.05 G-protein mediated signal transduction	1	0.72	NCU05810	55	0.54	1.33333	0.53294
11.04.03.01 splicing	2	1.44	NCU07420 NCU08963	131	1.3	1.10769	0.539133
34.11.03 chemoperception and response	3	2.17	NCU01452 NCU01906 NCU08384	209	2.07	1.04831	0.549465
32.05.05 virulence, disease factors	1	0.72	NCU04870	61	0.6	1.2	0.570272
30.05 transmembrane signal transduction	1	0.72	NCU01704	63	0.62	1.16129	0.582046
10.01.05.01 DNA repair	2	1.44	NCU07420 NCU00489	147	1.46	0.986301	0.601994
01.03 nucleotide/nucleoside/nucleobase metabolism	3	2.17	NCU04202 NCU07420 NCU05274	228	2.26	0.960177	0.608808
18.02.01.01 enzyme activator	1	0.72	NCU06035	72	0.71	1.01408	0.631185
34 INTERACTION WITH THE ENVIRONMENT	6	4.34	NCU01906 NCU02075 NCU04202 NCU08164 NCU01452 NCU08384	473	4.69	0.925373	0.635424
40 CELL FATE	3	2.17	NCU05274 NCU01704 NCU02075	241	2.39	0.90795	0.646335
18.02.01 enzymatic activity regulation / enzyme regulator	2	1.44	NCU06035 NCU02075	167	1.65	0.872727	0.671267
10.01 DNA processing	4	2.89	NCU00489 NCU07420 NCU02075 NCU04202	333	3.3	0.875758	0.674713
11.04.03 mRNA processing (splicing, 5'-, 3'-end processing)	2	1.44	NCU07420 NCU08963	177	1.75	0.822857	0.702109
10.01.05 DNA recombination and DNA repair	2	1.44	NCU07420 NCU00489	181	1.79	0.804469	0.713762
42 BIOGENESIS OF CELLULAR COMPONENTS	6	4.34	NCU01195 NCU20467 NCU02075 NCU07922 NCU09923 NCU04202	523	5.19	0.836224	0.729326
32.05 disease, virulence and defense	2	1.44	NCU04870 NCU00130	187	1.85	0.778378	0.730529
30 CELLULAR COMMUNICATION/SIGNAL TRANSDUCTION MECHANISM	3	2.17	NCU04202 NCU05810 NCU01704	286	2.84	0.764085	0.756293
14.04 protein targeting, sorting and translocation	2	1.44	NCU00971 NCU02075	203	2.01	0.716418	0.771237
11.04 RNA processing	3	2.17	NCU07420 NCU02181 NCU08963	298	2.96	0.733108	0.780536
18.02 regulation of protein activity	2	1.44	NCU06035 NCU02075	211	2.09	0.688995	0.789524
20.03 transport facilities	3	2.17	NCU02075 NCU03910 NCU08114	303	3.01	0.72093	0.790041
14.07 protein modification	5	3.62	NCU04202 NCU02075 NCU20991 NCU05810 NCU04553	484	4.8	0.754167	0.799843
18 REGULATION OF METABOLISM AND PROTEIN FUNCTION	2	1.44	NCU02075 NCU06035	216	2.14	0.672897	0.800294
14.13 protein/peptide degradation	2	1.44	NCU20991 NCU04553	223	2.21	0.651584	0.814557
02.13 respiration	1	0.72	NCU02193	138	1.37	0.525547	0.853125
30.01.05 enzyme mediated signal transduction	1	0.72	NCU05810	139	1.38	0.521739	0.855167
43.01.03.05 budding, cell polarity and filament formation	1	0.72	NCU03393	145	1.44	0.5	0.866838
30.01 cellular signalling	2	1.44	NCU04202 NCU05810	257	2.55	0.564706	0.871708
14.07.03 modification by phosphorylation, dephosphorylation, autophosphorylation	1	0.72	NCU04202	155	1.53	0.470588	0.884251
34.11.03.07 pheromone response, mating-type determination, sex-specific proteins	1	0.72	NCU01452	158	1.56	0.461538	0.889019
34.01.01 homeostasis of cations	1	0.72	NCU02075	165	1.63	0.441718	0.899401
43 CELL TYPE DIFFERENTIATION	2	1.44	NCU03393 NCU02075	280	2.78	0.517986	0.900722
16.03.01 DNA binding	1	0.72	NCU07420	167	1.65	0.436364	0.902186
20.01.15 electron transport	1	0.72	NCU03910	168	1.66	0.433735	0.903549
20.09.07 vesicular transport (Golgi network, etc.)	1	0.72	NCU02075	174	1.72	0.418605	0.911344
14 PROTEIN FATE (folding, modification, destination)	8	5.79	NCU04202 NCU05810 NCU08964 NCU00971 NCU04553 NCU03393 NCU20991 NCU02075	862	8.56	0.676402	0.913592
10.03.01 mitotic cell cycle and cell cycle control	2	1.44	NCU08964 NCU02075	298	2.96	0.486486	0.919058
34.01 homeostasis	1	0.72	NCU02075	186	1.84	0.391304	0.925105
10 CELL CYCLE AND DNA PROCESSING	5	3.62	NCU08964 NCU04202 NCU00489 NCU02075 NCU07420	622	6.17	0.58671	0.934266
20.09.18 cellular import	1	0.72	NCU08114	200	1.98	0.363636	0.9385
20.01 transported compounds (substrates)	5	3.62	NCU03910 NCU07420 NCU00971 NCU02075 NCU08114	662	6.57	0.550989	0.953985
10.03 cell cycle	2	1.44	NCU08964 NCU02075	403	4	0.36	0.976613
43.01 fungal/microorganismic cell type differentiation	1	0.72	NCU03393	270	2.68	0.268657	0.977137
43.01.03 fungal and other eukaryotic cell type differentiation	1	0.72	NCU03393	270	2.68	0.268657	0.977137
20.09 transport routes	4	2.89	NCU07420 NCU02075 NCU08114 NCU00971	636	6.31	0.458003	0.978003
11.02.03 mRNA synthesis	2	1.44	NCU04202 NCU07420	465	4.61	0.312364	0.989124
11 TRANSCRIPTION	4	2.89	NCU02181 NCU08963 NCU07420 NCU04202	725	7.2	0.401389	0.991418
11.02.03.04 transcriptional control	1	0.72	NCU04202	350	3.47	0.207493	0.992685
11.02 RNA synthesis	2	1.44	NCU04202 NCU07420	533	5.29	0.272212	0.995405
20 CELLULAR TRANSPORT, TRANSPORT FACILITIES AND TRANSPORT ROUTES	5	3.62	NCU07420 NCU08114 NCU02075 NCU03910 NCU00971	970	9.63	0.375909	0.997981
99 UNCLASSIFIED PROTEINS	15	10.8	NCU20699 NCU09968 NCU09689 NCU07192 NCU21095 NCU05170 NCU01430 NCU05404 NCU20716 NCU05832 NCU03322 NCU09924 NCU05134 NCU06143 NCU21909	5853	58.1	0.185886	1
01.03.01 purin nucleotide/nucleoside/nucleobase metabolism	1	0.72	NCU04202	109	1.08	0.666667	1
10.01.03 DNA synthesis and replication	1	0.72	NCU02075	101	1	0.72	1
10.01.09 DNA restriction or modification	1	0.72	NCU04202	113	1.12	0.642857	1
10.01.09.05 DNA conformation modification (e.g. chromatin)	1	0.72	NCU04202	110	1.09	0.66055	1
10.03.02 meiosis	1	0.72	NCU02075	75	0.74	0.972973	1
14.01 protein folding and stabilization	1	0.72	NCU02075	81	0.8	0.9	1
16.19.05 GTP binding	1	0.72	NCU06035	84	0.83	0.86747	1
20.01.03 C-compound and carbohydrate transport	1	0.72	NCU08114	107	1.06	0.679245	1
20.09.04 mitochondrial transport	1	0.72	NCU02075	91	0.9	0.8	1
20.09.18.07 non-vesicular cellular import	1	0.72	NCU08114	89	0.88	0.818182	1
34.01.01.01 homeostasis of metal ions (Na, K, Ca etc.)	1	0.72	NCU02075	117	1.16	0.62069	1
42.10.03 organization of chromosome structure	1	0.72	NCU04202	82	0.81	0.888889	1

## Sheet: P3
FUNCTIONAL CATEGORY	abs SET	rel SET	genes SET	abs GENOME	rel GENOME	rel SET/rel GENOME	P-VALUE
16 PROTEIN WITH BINDING FUNCTION OR COFACTOR REQUIREMENT (structural or catalytic)	194	40.7	NCU21398 NCU04421 NCU07041 NCU01635 NCU02464 NCU05889 NCU00635 NCU04050 NCU00405 NCU01612 NCU03117 NCU04288 NCU08323 NCU00712 NCU02136 NCU03748 NCU06606 NCU07829 NCU01290 NCU06075 NCU06970 NCU02624 NCU03347 NCU01638 NCU02954 NCU03515 NCU09089 NCU09789 NCU03539 NCU04020 NCU05782 NCU06441 NCU08923 NCU09521 NCU00294 NCU06943 NCU08693 NCU09602 NCU00385 NCU02250 NCU03857 NCU04899 NCU01234 NCU02437 NCU…	1375	13.6	2.99265	2.73653e-51
01 METABOLISM	201	42.2	NCU00187 NCU02274 NCU03669 NCU04118 NCU01258 NCU04510 NCU02639 NCU05278 NCU05298 NCU06512 NCU06694 NCU07697 NCU02325 NCU05420 NCU06232 NCU09076 NCU02004 NCU02677 NCU09602 NCU01428 NCU01904 NCU04768 NCU06402 NCU08226 NCU00892 NCU06187 NCU09789 NCU01701 NCU08162 NCU09497 NCU01233 NCU02464 NCU06054 NCU06727 NCU07459 NCU07930 NCU02430 NCU03010 NCU03492 NCU06550 NCU08968 NCU20459 NCU00643 NCU02954 NCU…	1740	17.2	2.45349	2.18119e-39
01.01 amino acid metabolism	80	16.8	NCU03283 NCU06232 NCU07459 NCU07697 NCU02677 NCU08287 NCU02005 NCU10468 NCU20511 NCU00554 NCU04050 NCU04510 NCU08162 NCU03748 NCU04385 NCU09320 NCU05298 NCU07690 NCU09817 NCU01692 NCU01632 NCU03004 NCU05420 NCU07732 NCU20594 NCU01271 NCU03857 NCU05977 NCU06512 NCU01300 NCU01666 NCU01744 NCU02274 NCU02010 NCU03347 NCU07725 NCU03010 NCU03608 NCU09111 NCU06452 NCU06727 NCU09789 NCU02657 NCU02954 NCU…	319	3.16	5.31646	3.98641e-37
12 PROTEIN SYNTHESIS	77	16.1	NCU02003 NCU07868 NCU00475 NCU09089 NCU03737 NCU07929 NCU07829 NCU01234 NCU06469 NCU08332 NCU09521 NCU02076 NCU00294 NCU07414 NCU09463 NCU01612 NCU05233 NCU08923 NCU06943 NCU08046 NCU05289 NCU05804 NCU07839 NCU08663 NCU09076 NCU20421 NCU00925 NCU01331 NCU07690 NCU02208 NCU08296 NCU03066 NCU07014 NCU02546 NCU05095 NCU07831 NCU03876 NCU03702 NCU00410 NCU08137 NCU07380 NCU20009 NCU09903 NCU06099 NCU…	362	3.59	4.48468	1.9123e-30
12.04 translation	48	10	NCU09089 NCU06099 NCU20009 NCU07380 NCU08332 NCU03737 NCU05889 NCU20005 NCU07182 NCU06469 NCU08046 NCU07414 NCU01021 NCU03148 NCU03826 NCU09903 NCU21398 NCU00294 NCU07829 NCU02208 NCU02076 NCU00410 NCU07014 NCU00457 NCU05804 NCU09707 NCU04799 NCU07929 NCU01234 NCU03061 NCU01612 NCU09076 NCU02003 NCU03876 NCU00475 NCU07700 NCU00635 NCU20421 NCU04790 NCU07868 NCU06661 NCU07831 NCU07839 NCU08277 NCU…	188	1.86	5.37634	9.23284e-23
16.21 complex cofactor/cosubstrate/vitamine binding	50	10.5	NCU02549 NCU01528 NCU04754 NCU21057 NCU06232 NCU07690 NCU02505 NCU04510 NCU03857 NCU06606 NCU08923 NCU09816 NCU00643 NCU02954 NCU03748 NCU04899 NCU06695 NCU08663 NCU02624 NCU03100 NCU02056 NCU04768 NCU07982 NCU08535 NCU02274 NCU20459 NCU20769 NCU01904 NCU07930 NCU00355 NCU03492 NCU06452 NCU01632 NCU07697 NCU03347 NCU00963 NCU07987 NCU01808 NCU04280 NCU06666 NCU00712 NCU07659 NCU04077 NCU04452 NCU…	206	2.04	5.14706	1.31735e-22
01.03 nucleotide/nucleoside/nucleobase metabolism	51	10.7	NCU06970 NCU08332 NCU07839 NCU03539 NCU01985 NCU09468 NCU01428 NCU09477 NCU03515 NCU00261 NCU03963 NCU05290 NCU07732 NCU02629 NCU09911 NCU09320 NCU03713 NCU00177 NCU01638 NCU02464 NCU09896 NCU04216 NCU08228 NCU09789 NCU00963 NCU04790 NCU02533 NCU08685 NCU08287 NCU09076 NCU09132 NCU08340 NCU08297 NCU06075 NCU01550 NCU03117 NCU02677 NCU06187 NCU10053 NCU01290 NCU04054 NCU04019 NCU00843 NCU03061 NCU…	228	2.26	4.73451	2.52465e-21
01.01.06 metabolism of the aspartate family	30	6.3	NCU02274 NCU07690 NCU07930 NCU02571 NCU05238 NCU08162 NCU02954 NCU08898 NCU02639 NCU02005 NCU09896 NCU03010 NCU05977 NCU04077 NCU20511 NCU04118 NCU03425 NCU00554 NCU01985 NCU04303 NCU09532 NCU03748 NCU07987 NCU06232 NCU06512 NCU03935 NCU09789 NCU07697 NCU02657 NCU20594	75	0.74	8.51351	7.74574e-21
12.04.01 translation initiation	25	5.25	NCU01234 NCU09707 NCU08277 NCU09076 NCU03876 NCU01369 NCU07831 NCU07380 NCU02076 NCU06099 NCU05889 NCU08046 NCU07929 NCU07839 NCU00457 NCU09903 NCU02208 NCU04799 NCU06279 NCU08332 NCU20009 NCU07868 NCU20005 NCU03061 NCU21398	50	0.49	10.7143	1.68056e-20
16.01 protein binding	85	17.8	NCU02534 NCU04790 NCU07956 NCU02076 NCU02533 NCU06550 NCU03539 NCU07930 NCU03241 NCU06441 NCU02136 NCU09132 NCU04054 NCU08944 NCU10042 NCU05889 NCU09602 NCU03565 NCU06464 NCU03396 NCU03321 NCU06561 NCU05269 NCU02464 NCU04288 NCU08693 NCU07459 NCU01503 NCU02435 NCU03061 NCU08277 NCU08340 NCU09239 NCU09436 NCU20075 NCU21431 NCU00202 NCU01589 NCU09076 NCU07659 NCU06279 NCU02437 NCU00475 NCU02003 NCU…	678	6.73	2.64487	2.4702e-17
20.09.04 mitochondrial transport	28	5.88	NCU03561 NCU00385 NCU04245 NCU08693 NCU02269 NCU01241 NCU01179 NCU00227 NCU00431 NCU00465 NCU04304 NCU05430 NCU02514 NCU06632 NCU04837 NCU01589 NCU07414 NCU09119 NCU09143 NCU11311 NCU09477 NCU05168 NCU05390 NCU05075 NCU01689 NCU02423 NCU07884 NCU09602	91	0.9	6.53333	5.01824e-16
16.19 nucleotide/nucleoside/nucleobase binding	59	12.3	NCU01632 NCU08046 NCU09076 NCU07697 NCU20488 NCU04790 NCU01369 NCU02677 NCU00405 NCU01227 NCU08920 NCU02657 NCU04020 NCU00385 NCU03737 NCU04054 NCU01550 NCU21398 NCU20075 NCU09602 NCU04173 NCU06785 NCU08535 NCU08297 NCU07839 NCU03515 NCU04334 NCU09119 NCU08340 NCU02464 NCU02505 NCU09903 NCU05430 NCU04410 NCU09468 NCU01612 NCU10053 NCU05269 NCU01234 NCU02003 NCU03539 NCU09132 NCU02208 NCU03061 NCU…	397	3.94	3.12183	1.73191e-15
01.01.03 assimilation of ammonia, metabolism of the glutamate group	23	4.83	NCU00567 NCU08287 NCU07732 NCU02639 NCU10468 NCU03347 NCU00261 NCU04280 NCU02954 NCU04216 NCU20025 NCU03857 NCU05410 NCU09111 NCU02677 NCU08162 NCU01744 NCU00892 NCU05298 NCU04303 NCU07697 NCU01692 NCU07307	64	0.63	7.66667	4.73232e-15
02 ENERGY	56	11.7	NCU04304 NCU03857 NCU02252 NCU04899 NCU01786 NCU06441 NCU09119 NCU00385 NCU02056 NCU02534 NCU06482 NCU04510 NCU05430 NCU20012 NCU01728 NCU01904 NCU03340 NCU06232 NCU01528 NCU02274 NCU01227 NCU04142 NCU09477 NCU01680 NCU07697 NCU02505 NCU06785 NCU04768 NCU05457 NCU07042 NCU10042 NCU06695 NCU00087 NCU01808 NCU02629 NCU06075 NCU02954 NCU02136 NCU03559 NCU06142 NCU09111 NCU04280 NCU02549 NCU09816 NCU…	375	3.72	3.14516	7.82929e-15
01.03.01 purin nucleotide/nucleoside/nucleobase metabolism	28	5.88	NCU01786 NCU08685 NCU03117 NCU03963 NCU02274 NCU06970 NCU02464 NCU00177 NCU02657 NCU09911 NCU06187 NCU09320 NCU09789 NCU02629 NCU04216 NCU07700 NCU00843 NCU03515 NCU09896 NCU08297 NCU04054 NCU08340 NCU00963 NCU09468 NCU01428 NCU09132 NCU02325 NCU01550	109	1.08	5.44444	8.27718e-14
12.01 ribosome biogenesis	40	8.4	NCU06099 NCU06943 NCU02066 NCU08137 NCU03321 NCU03702 NCU09089 NCU07839 NCU00925 NCU06661 NCU03066 NCU01503 NCU05782 NCU07041 NCU00475 NCU08277 NCU20421 NCU01524 NCU05233 NCU07547 NCU05289 NCU05804 NCU07014 NCU07690 NCU03061 NCU08663 NCU02546 NCU06469 NCU08923 NCU09521 NCU06464 NCU08296 NCU01612 NCU08968 NCU01331 NCU07829 NCU00294 NCU02477 NCU07182 NCU03565	221	2.19	3.83562	1.23977e-13
16.03 nucleic acid binding	51	10.7	NCU01634 NCU02076 NCU02435 NCU08277 NCU02208 NCU08807 NCU09239 NCU04050 NCU01524 NCU01422 NCU06661 NCU04485 NCU04173 NCU07829 NCU07868 NCU00419 NCU01635 NCU00635 NCU02098 NCU07956 NCU09076 NCU08046 NCU00915 NCU07041 NCU02437 NCU09349 NCU01638 NCU00212 NCU03148 NCU01369 NCU08323 NCU04799 NCU02533 NCU01612 NCU03702 NCU03565 NCU04508 NCU08923 NCU08518 NCU06943 NCU07735 NCU07839 NCU01589 NCU01234 NCU…	346	3.43	3.11953	2.32765e-13
01.07 metabolism of vitamins, cofactors, and prosthetic groups	35	7.35	NCU01083 NCU06189 NCU07930 NCU07308 NCU01376 NCU01546 NCU20769 NCU03857 NCU04899 NCU03347 NCU02505 NCU02657 NCU05752 NCU06550 NCU07732 NCU02305 NCU06785 NCU01271 NCU04510 NCU00643 NCU04768 NCU03425 NCU09111 NCU00963 NCU02677 NCU02056 NCU02274 NCU20511 NCU00892 NCU04019 NCU06727 NCU07690 NCU05420 NCU06549 NCU08228	176	1.74	4.22414	2.53108e-13
42 BIOGENESIS OF CELLULAR COMPONENTS	63	13.2	NCU06441 NCU01271 NCU05075 NCU00925 NCU08228 NCU06469 NCU06727 NCU08296 NCU00202 NCU01422 NCU04288 NCU03396 NCU06702 NCU01689 NCU04173 NCU20005 NCU01290 NCU03515 NCU07459 NCU04899 NCU07253 NCU05789 NCU08909 NCU00212 NCU03148 NCU01634 NCU05238 NCU11311 NCU02056 NCU10468 NCU08693 NCU03561 NCU09468 NCU00261 NCU08340 NCU08535 NCU09903 NCU00957 NCU06632 NCU09132 NCU01612 NCU05680 NCU01438 NCU03297 NCU…	523	5.19	2.54335	3.53001e-12
20 CELLULAR TRANSPORT, TRANSPORT FACILITIES AND TRANSPORT ROUTES	94	19.7	NCU03515 NCU08743 NCU03561 NCU08379 NCU02423 NCU05420 NCU09076 NCU07697 NCU08920 NCU09119 NCU11236 NCU02464 NCU03425 NCU04837 NCU02269 NCU03857 NCU04245 NCU00431 NCU03559 NCU04288 NCU00790 NCU01808 NCU00644 NCU04768 NCU04054 NCU08297 NCU08325 NCU03061 NCU06075 NCU05168 NCU06606 NCU09132 NCU02534 NCU06702 NCU20352 NCU00227 NCU01550 NCU09468 NCU03066 NCU01065 NCU03297 NCU09602 NCU07459 NCU01241 NCU…	970	9.63	2.04569	4.88693e-12
16.21.07 NAD/NADP binding	25	5.25	NCU01528 NCU04899 NCU07930 NCU00712 NCU02534 NCU00643 NCU09111 NCU00963 NCU01632 NCU04510 NCU07697 NCU01233 NCU04077 NCU02056 NCU21057 NCU02954 NCU03857 NCU05238 NCU07690 NCU01904 NCU03100 NCU06232 NCU20769 NCU03748 NCU06666	103	1.02	5.14706	7.20132e-12
01.01.06.06.01 biosynthesis of lysine	11	2.31	NCU08898 NCU06232 NCU20594 NCU03935 NCU00554 NCU03010 NCU03748 NCU05977 NCU07697 NCU02954 NCU09532	16	0.15	15.4	8.32404e-12
01.05 C-compound and carbohydrate metabolism	79	16.5	NCU00187 NCU04510 NCU05836 NCU00643 NCU03347 NCU07659 NCU08968 NCU01233 NCU02785 NCU07338 NCU07982 NCU01904 NCU06441 NCU10042 NCU20791 NCU07253 NCU07930 NCU01632 NCU01692 NCU08297 NCU07697 NCU02505 NCU06785 NCU01227 NCU08228 NCU03702 NCU04857 NCU06075 NCU20594 NCU01666 NCU06694 NCU08535 NCU02954 NCU02056 NCU08943 NCU02136 NCU05680 NCU08162 NCU01528 NCU03004 NCU07459 NCU09111 NCU00963 NCU00087 NCU…	759	7.54	2.18833	1.01925e-11
01.01.06.05 metabolism of methionine	14	2.94	NCU04077 NCU07930 NCU20511 NCU07690 NCU07987 NCU02657 NCU09896 NCU03935 NCU02005 NCU05238 NCU01985 NCU06512 NCU00554 NCU04118	31	0.3	9.8	2.92918e-11
42.10 nucleus	25	5.25	NCU01612 NCU04173 NCU06943 NCU09468 NCU00212 NCU08535 NCU09436 NCU01290 NCU01438 NCU00635 NCU03148 NCU03396 NCU06679 NCU04054 NCU01635 NCU08693 NCU07459 NCU02435 NCU04288 NCU00925 NCU02437 NCU01422 NCU01634 NCU09602 NCU09132	110	1.09	4.81651	3.40687e-11
20.01 transported compounds (substrates)	71	14.9	NCU01689 NCU08693 NCU05390 NCU04173 NCU06632 NCU03559 NCU02549 NCU07112 NCU00227 NCU02514 NCU05168 NCU08297 NCU00790 NCU04899 NCU03515 NCU01065 NCU04799 NCU02269 NCU07884 NCU09076 NCU01234 NCU02534 NCU03561 NCU06606 NCU09602 NCU03257 NCU05420 NCU07459 NCU00635 NCU01808 NCU05075 NCU08379 NCU04304 NCU08225 NCU09119 NCU01179 NCU08407 NCU00465 NCU06695 NCU08228 NCU04127 NCU08340 NCU09816 NCU02464 NCU…	662	6.57	2.26788	3.4174e-11
01.01.06.06 metabolism of lysine	13	2.73	NCU03748 NCU20594 NCU03935 NCU05977 NCU02571 NCU00554 NCU06232 NCU02954 NCU09532 NCU07697 NCU08898 NCU03010 NCU02274	27	0.26	10.5	5.49689e-11
01.01.11.03.01 biosynthesis of valine	9	1.89	NCU04579 NCU03608 NCU07982 NCU07697 NCU01666 NCU20459 NCU06232 NCU02954 NCU04754	12	0.11	17.1818	2.12855e-10
01.05.13 transfer of activated C-1 groups	14	2.94	NCU03347 NCU02657 NCU03669 NCU02629 NCU00963 NCU08968 NCU02624 NCU07930 NCU07690 NCU00843 NCU02274 NCU10053 NCU07459 NCU03702	35	0.34	8.64706	2.15122e-10
11.04.01 rRNA processing	27	5.67	NCU04485 NCU03321 NCU07041 NCU08951 NCU09076 NCU08323 NCU06943 NCU00925 NCU01331 NCU07956 NCU06217 NCU03702 NCU01234 NCU01369 NCU05233 NCU07839 NCU05782 NCU08968 NCU09349 NCU01290 NCU01503 NCU01612 NCU03396 NCU07547 NCU01257 NCU03669 NCU03066	139	1.38	4.1087	2.56716e-10
01.03.01.03 purine nucleotide/nucleoside/nucleobase anabolism	13	2.73	NCU06970 NCU02325 NCU00963 NCU09789 NCU08685 NCU09911 NCU06187 NCU02629 NCU00177 NCU03117 NCU00843 NCU01786 NCU04216	31	0.3	9.1	4.74757e-10
16.03.03 RNA binding	29	6.09	NCU01369 NCU06099 NCU07829 NCU02208 NCU07956 NCU03396 NCU01524 NCU03565 NCU01612 NCU06217 NCU09076 NCU08277 NCU08295 NCU03092 NCU07839 NCU01234 NCU08046 NCU08663 NCU08323 NCU02076 NCU06661 NCU04799 NCU07868 NCU08518 NCU01290 NCU04485 NCU03702 NCU07041 NCU06943	165	1.63	3.7362	6.69296e-10
01.01.11.04.01 biosynthesis of leucine	9	1.89	NCU02010 NCU04385 NCU06232 NCU20459 NCU02954 NCU07697 NCU03608 NCU04754 NCU04579	14	0.13	14.5385	1.77865e-09
16.17 metal binding	37	7.77	NCU06075 NCU03492 NCU09816 NCU01638 NCU02657 NCU09789 NCU02505 NCU06785 NCU08923 NCU20769 NCU03117 NCU09265 NCU01546 NCU02624 NCU04173 NCU08663 NCU00465 NCU07930 NCU06695 NCU07982 NCU06054 NCU01241 NCU10042 NCU09264 NCU02252 NCU04421 NCU02549 NCU04334 NCU07414 NCU06970 NCU08535 NCU01808 NCU00643 NCU06207 NCU08287 NCU00227 NCU03061	262	2.6	2.98846	1.83949e-09
40 CELL FATE	35	7.35	NCU03515 NCU08693 NCU04173 NCU09602 NCU09937 NCU06679 NCU09995 NCU09733 NCU02003 NCU05889 NCU00925 NCU20488 NCU02668 NCU01290 NCU06970 NCU08340 NCU01589 NCU00202 NCU07253 NCU03117 NCU06694 NCU02464 NCU09436 NCU01083 NCU08297 NCU04304 NCU06464 NCU09264 NCU05430 NCU08323 NCU05269 NCU06561 NCU20075 NCU02468 NCU06815	241	2.39	3.07531	2.41904e-09
20.03 transport facilities	40	8.4	NCU05457 NCU03061 NCU01179 NCU04768 NCU08407 NCU00644 NCU09119 NCU01808 NCU01680 NCU03257 NCU00790 NCU01550 NCU08325 NCU04245 NCU02514 NCU06075 NCU04127 NCU20352 NCU06632 NCU02423 NCU03559 NCU03199 NCU09602 NCU09564 NCU05430 NCU07884 NCU00431 NCU03561 NCU05168 NCU09477 NCU08693 NCU08920 NCU01065 NCU08379 NCU05390 NCU00385 NCU02250 NCU06695 NCU04304 NCU02269	303	3.01	2.7907	2.96972e-09
16.19.03 ATP binding	39	8.19	NCU04020 NCU01369 NCU01227 NCU06785 NCU00177 NCU03061 NCU20488 NCU02505 NCU09477 NCU02657 NCU04142 NCU05782 NCU00405 NCU09076 NCU07697 NCU02514 NCU08693 NCU08920 NCU05269 NCU02639 NCU08535 NCU04410 NCU08287 NCU01612 NCU04334 NCU09903 NCU07839 NCU02677 NCU00385 NCU05430 NCU01632 NCU09119 NCU09602 NCU00915 NCU01234 NCU04173 NCU01550 NCU09349 NCU03539	292	2.9	2.82414	3.37717e-09
01.02 nitrogen, sulfur and selenium metabolism	26	5.46	NCU04077 NCU02004 NCU01985 NCU20511 NCU01428 NCU02639 NCU05994 NCU02005 NCU07690 NCU05298 NCU01744 NCU06452 NCU07112 NCU09896 NCU03347 NCU02677 NCU07987 NCU08287 NCU20944 NCU01258 NCU00261 NCU04303 NCU05410 NCU05238 NCU02430 NCU04754	150	1.49	3.66443	7.06938e-09
16.19.05 GTP binding	19	3.99	NCU09789 NCU01550 NCU03826 NCU09468 NCU02546 NCU08297 NCU03737 NCU04790 NCU07700 NCU02003 NCU04054 NCU01227 NCU03515 NCU02464 NCU05289 NCU08340 NCU09132 NCU20075 NCU21398	84	0.83	4.80723	8.765e-09
01.01.06.06.01.03 aminoadipic acid pathway	7	1.47	NCU20594 NCU02954 NCU07697 NCU03748 NCU08898 NCU06232 NCU03010	9	0.08	18.375	1.67897e-08
01.02.03 sulfur metabolism	7	1.47	NCU09896 NCU20511 NCU04077 NCU02005 NCU05238 NCU01985 NCU02004	9	0.08	18.375	1.67897e-08
01.02.03.01 sulfate assimilation	7	1.47	NCU02004 NCU09896 NCU04077 NCU05238 NCU01985 NCU20511 NCU02005	9	0.08	18.375	1.67897e-08
20.01.15 electron transport	27	5.67	NCU04768 NCU02250 NCU07697 NCU01680 NCU04899 NCU04452 NCU02514 NCU09119 NCU08923 NCU02056 NCU05457 NCU05430 NCU02954 NCU03297 NCU08663 NCU06606 NCU00385 NCU05420 NCU02549 NCU03559 NCU08228 NCU06695 NCU01808 NCU07112 NCU09816 NCU03857 NCU02534	168	1.66	3.41566	1.94563e-08
01.01.05 metabolism of urea cycle, creatine and polyamines	11	2.31	NCU01271 NCU05410 NCU09532 NCU02677 NCU01083 NCU02056 NCU06727 NCU05977 NCU02639 NCU08287 NCU08162	28	0.27	8.55556	2.43655e-08
02.13.03 aerobic respiration	18	3.78	NCU02534 NCU04768 NCU05457 NCU06695 NCU02250 NCU09816 NCU01904 NCU04304 NCU02514 NCU00385 NCU02549 NCU02629 NCU03559 NCU01808 NCU09119 NCU06606 NCU05430 NCU09477	81	0.8	4.725	2.9128e-08
01.07.01 biosynthesis of vitamins, cofactors, and prosthetic groups	21	4.41	NCU06727 NCU01546 NCU00892 NCU07690 NCU04019 NCU01083 NCU02056 NCU06785 NCU20511 NCU01271 NCU07930 NCU02657 NCU01376 NCU03347 NCU03425 NCU06549 NCU06189 NCU05752 NCU07308 NCU02305 NCU06550	110	1.09	4.04587	3.56191e-08
01.01.03.05.01 biosynthesis of arginine	8	1.68	NCU00567 NCU10468 NCU08287 NCU08162 NCU07732 NCU02639 NCU05410 NCU02677	14	0.13	12.9231	5.50989e-08
01.01.11.02.01 biosynthesis of isoleucine	8	1.68	NCU04579 NCU07982 NCU07697 NCU03608 NCU02954 NCU20459 NCU04754 NCU06232	14	0.13	12.9231	5.50989e-08
01.01.11.03 metabolism of valine	9	1.89	NCU20459 NCU04754 NCU03608 NCU07697 NCU01666 NCU04579 NCU06232 NCU02954 NCU07982	19	0.18	10.5	6.63337e-08
02.13 respiration	23	4.83	NCU09816 NCU02056 NCU01904 NCU02274 NCU02250 NCU09477 NCU06606 NCU05457 NCU02534 NCU06695 NCU05430 NCU02514 NCU02549 NCU04304 NCU09143 NCU03559 NCU04768 NCU03340 NCU09119 NCU00385 NCU00644 NCU01808 NCU02629	138	1.37	3.52555	1.1206e-07
01.01.03.01 metabolism of glutamine	8	1.68	NCU08287 NCU03347 NCU00261 NCU09111 NCU07307 NCU07732 NCU02677 NCU04303	15	0.14	12	1.13199e-07
11 TRANSCRIPTION	66	13.8	NCU04485 NCU09349 NCU05994 NCU20075 NCU01369 NCU07700 NCU05233 NCU02437 NCU01257 NCU04508 NCU00405 NCU09436 NCU05782 NCU01638 NCU00768 NCU01234 NCU02533 NCU05889 NCU00087 NCU04173 NCU04410 NCU08295 NCU06485 NCU07041 NCU07547 NCU07956 NCU09995 NCU03669 NCU00925 NCU08923 NCU00419 NCU07670 NCU01612 NCU02423 NCU09521 NCU07829 NCU07839 NCU01331 NCU01290 NCU08968 NCU09076 NCU03396 NCU03321 NCU04799 NCU…	725	7.2	1.91667	1.40046e-07
02.01 glycolysis and gluconeogenesis	15	3.15	NCU01728 NCU03004 NCU06482 NCU06075 NCU09111 NCU01528 NCU02954 NCU10042 NCU20012 NCU02252 NCU07697 NCU04510 NCU07659 NCU02505 NCU04899	63	0.62	5.08065	1.59132e-07
20.09 transport routes	60	12.6	NCU09468 NCU04288 NCU04245 NCU01998 NCU09132 NCU03515 NCU02464 NCU03425 NCU09602 NCU11311 NCU03066 NCU11237 NCU00227 NCU08407 NCU20352 NCU01065 NCU07414 NCU00385 NCU02066 NCU02269 NCU08379 NCU07334 NCU01589 NCU05168 NCU02514 NCU00431 NCU08340 NCU04127 NCU08663 NCU04173 NCU04837 NCU07884 NCU03257 NCU01179 NCU08693 NCU06632 NCU05075 NCU04421 NCU06702 NCU06694 NCU00465 NCU20611 NCU08325 NCU05430 NCU…	636	6.31	1.99683	1.62315e-07
02.10 tricarboxylic-acid pathway (citrate cycle, Krebs cycle, TCA cycle)	12	2.52	NCU04280 NCU06232 NCU04899 NCU03857 NCU07659 NCU06482 NCU01692 NCU02954 NCU07697 NCU06785 NCU03004 NCU01227	40	0.39	6.46154	1.81251e-07
41.01.01 mating (fertilization)	9	1.89	NCU09468 NCU03515 NCU08693 NCU08297 NCU09380 NCU04054 NCU09602 NCU09132 NCU02464	21	0.2	9.45	1.93854e-07
01.03.04 pyrimidine nucleotide/nucleoside/nucleobase metabolism	13	2.73	NCU03713 NCU00261 NCU07732 NCU05290 NCU06970 NCU01550 NCU08287 NCU10053 NCU02677 NCU08228 NCU01786 NCU07334 NCU01290	49	0.48	5.6875	2.76131e-07
01.01.09 metabolism of the cysteine - aromatic group	20	4.2	NCU09817 NCU01632 NCU04118 NCU07725 NCU00554 NCU01300 NCU06970 NCU02430 NCU02785 NCU05752 NCU01786 NCU05420 NCU09320 NCU21057 NCU03347 NCU07987 NCU02274 NCU03283 NCU03935 NCU06452	113	1.12	3.75	2.77715e-07
01.01.03.02.01 biosynthesis of glutamate	9	1.89	NCU07697 NCU03347 NCU01744 NCU04216 NCU04280 NCU01692 NCU02954 NCU03857 NCU05410	22	0.21	9	3.14411e-07
01.01.11.04 metabolism of leucine	9	1.89	NCU02954 NCU02010 NCU03608 NCU20459 NCU04385 NCU04579 NCU04754 NCU06232 NCU07697	22	0.21	9	3.14411e-07
01.06.06.11 tetracyclic and pentacyclic triterpenes (cholesterin, steroids and hopanoids) metabolism	13	2.73	NCU06402 NCU04156 NCU05278 NCU03922 NCU00712 NCU06207 NCU01333 NCU04510 NCU03006 NCU02624 NCU01233 NCU02571 NCU06054	50	0.49	5.57143	3.57285e-07
11.02.01 rRNA synthesis	13	2.73	NCU02533 NCU03702 NCU06485 NCU08951 NCU08968 NCU01638 NCU09521 NCU01257 NCU00925 NCU07166 NCU03396 NCU04508 NCU00419	51	0.5	5.46	4.5913e-07
11.04 RNA processing	35	7.35	NCU07041 NCU09076 NCU04485 NCU03061 NCU02423 NCU07670 NCU03396 NCU07700 NCU08951 NCU05233 NCU03702 NCU08295 NCU06217 NCU00087 NCU01503 NCU08968 NCU05782 NCU01331 NCU07839 NCU09349 NCU08323 NCU01612 NCU01290 NCU07956 NCU01369 NCU04410 NCU04799 NCU01257 NCU07547 NCU03669 NCU03066 NCU06943 NCU03321 NCU00925 NCU01234	298	2.96	2.48311	5.5127e-07
32.01.07 unfolded protein response (e.g. ER quality control)	13	2.73	NCU04334 NCU00635 NCU05269 NCU21431 NCU03148 NCU09265 NCU00692 NCU04410 NCU09602 NCU04142 NCU06279 NCU07956 NCU08693	52	0.51	5.35294	5.86154e-07
12.01.01 ribosomal proteins	23	4.83	NCU06661 NCU08663 NCU07014 NCU00475 NCU01524 NCU08137 NCU03565 NCU03702 NCU05782 NCU07182 NCU20421 NCU07690 NCU07839 NCU08296 NCU03061 NCU06099 NCU02477 NCU05804 NCU07829 NCU00294 NCU09089 NCU08277 NCU06469	152	1.51	3.19868	6.73092e-07
01.01.11 metabolism of the pyruvate family (alanine, isoleucine, leucine, valine) and D-alanine	12	2.52	NCU04385 NCU01666 NCU04754 NCU02010 NCU03004 NCU07697 NCU06232 NCU20459 NCU04579 NCU07982 NCU03608 NCU02954	46	0.45	5.6	9.73729e-07
16.03.01 DNA binding	24	5.04	NCU01635 NCU04173 NCU01638 NCU01634 NCU07839 NCU02098 NCU02437 NCU09076 NCU02533 NCU03148 NCU02435 NCU04508 NCU00212 NCU07735 NCU04050 NCU09239 NCU01589 NCU00419 NCU01422 NCU01369 NCU00635 NCU01234 NCU08807 NCU08923	167	1.65	3.05455	1.00771e-06
32.01 stress response	38	7.98	NCU01589 NCU01940 NCU09436 NCU00355 NCU07569 NCU07414 NCU06549 NCU03148 NCU05269 NCU01808 NCU06279 NCU04050 NCU08693 NCU09265 NCU02437 NCU01792 NCU00692 NCU09111 NCU04410 NCU06031 NCU00635 NCU02056 NCU21431 NCU00884 NCU08277 NCU03857 NCU07956 NCU04510 NCU08380 NCU03297 NCU06550 NCU00465 NCU04334 NCU04173 NCU09602 NCU09733 NCU01233 NCU04142	351	3.48	2.2931	1.39721e-06
01.06.06 isoprenoid metabolism	15	3.15	NCU01333 NCU03006 NCU00712 NCU01233 NCU06402 NCU06054 NCU03922 NCU06207 NCU02624 NCU02571 NCU04156 NCU04510 NCU02056 NCU05278 NCU02305	74	0.73	4.31507	1.46971e-06
01.01.03.05 metabolism of arginine	8	1.68	NCU05410 NCU08287 NCU10468 NCU02639 NCU00567 NCU07732 NCU08162 NCU02677	20	0.19	8.84211	1.7957e-06
01.01.11.02 metabolism of isoleucine	8	1.68	NCU04754 NCU20459 NCU07982 NCU04579 NCU03608 NCU07697 NCU06232 NCU02954	20	0.19	8.84211	1.7957e-06
20.01.01 ion transport	22	4.62	NCU09119 NCU05075 NCU03257 NCU01065 NCU07884 NCU04304 NCU03561 NCU00385 NCU02423 NCU08743 NCU05430 NCU05390 NCU01680 NCU08325 NCU02250 NCU09477 NCU00227 NCU02514 NCU08225 NCU00790 NCU20352 NCU09564	149	1.48	3.12162	1.79803e-06
42.16 mitochondrion	16	3.36	NCU08296 NCU04334 NCU01689 NCU11311 NCU04304 NCU03561 NCU06632 NCU06441 NCU04899 NCU04768 NCU01692 NCU20005 NCU06469 NCU03297 NCU05075 NCU02056	85	0.84	4	1.86449e-06
01.04 phosphate metabolism	33	6.93	NCU08743 NCU06970 NCU20488 NCU01376 NCU02657 NCU08920 NCU09132 NCU03061 NCU03713 NCU04019 NCU05390 NCU04054 NCU06075 NCU03515 NCU01632 NCU01701 NCU03963 NCU04142 NCU08693 NCU04118 NCU09903 NCU08325 NCU08340 NCU09896 NCU20025 NCU01786 NCU00567 NCU01550 NCU09468 NCU02464 NCU07700 NCU08297 NCU09602	287	2.85	2.43158	1.88766e-06
11.06.01 rRNA modification	6	1.26	NCU06943 NCU03702 NCU08968 NCU01290 NCU03396 NCU03669	10	0.09	14	1.93516e-06
10 CELL CYCLE AND DNA PROCESSING	56	11.7	NCU00212 NCU06679 NCU02464 NCU01689 NCU04754 NCU02098 NCU08944 NCU03515 NCU07380 NCU09132 NCU09602 NCU02208 NCU03539 NCU02437 NCU03148 NCU04847 NCU01422 NCU05304 NCU00635 NCU02435 NCU03396 NCU04173 NCU06943 NCU01369 NCU01635 NCU04142 NCU08693 NCU02076 NCU09436 NCU01234 NCU07839 NCU10053 NCU00465 NCU20005 NCU01634 NCU08297 NCU01612 NCU09076 NCU09995 NCU01290 NCU01438 NCU02066 NCU09239 NCU09349 NCU…	622	6.17	1.89627	1.95773e-06
01.05.02.04 sugar, glucoside, polyol and carboxylate anabolism	13	2.73	NCU02136 NCU04899 NCU08228 NCU02954 NCU06666 NCU01692 NCU06075 NCU03857 NCU07697 NCU10042 NCU01528 NCU00643 NCU04280	59	0.58	4.7069	2.75723e-06
01.05.13.03 tetrahydrofolate-dependent C-1-transfer	6	1.26	NCU02629 NCU02274 NCU00963 NCU07690 NCU00843 NCU10053	11	0.1	12.6	4.0874e-06
01.01.03.02 metabolism of glutamate	10	2.1	NCU05410 NCU02954 NCU07697 NCU04216 NCU01692 NCU03857 NCU01744 NCU03347 NCU04280 NCU07307	36	0.35	6	4.25692e-06
01.20 secondary metabolism	29	6.09	NCU00187 NCU01546 NCU02056 NCU05420 NCU20511 NCU04510 NCU07725 NCU10468 NCU02639 NCU03347 NCU01233 NCU00567 NCU01904 NCU06189 NCU03283 NCU01271 NCU10042 NCU06727 NCU09817 NCU02657 NCU06666 NCU01632 NCU02305 NCU01083 NCU03561 NCU09111 NCU00643 NCU02571 NCU05410	245	2.43	2.50617	4.51242e-06
42.10.07 nucleolus	4	0.84	NCU01290 NCU03396 NCU00925 NCU06943	4	0.03	28	4.9405e-06
01.06 lipid, fatty acid and isoprenoid metabolism	40	8.4	NCU01333 NCU01233 NCU02305 NCU06783 NCU02624 NCU01422 NCU07859 NCU08943 NCU08944 NCU08535 NCU04899 NCU05278 NCU03857 NCU08909 NCU02209 NCU02274 NCU04156 NCU06031 NCU03283 NCU03492 NCU06402 NCU00261 NCU06207 NCU01904 NCU03004 NCU02571 NCU04510 NCU06694 NCU02505 NCU00712 NCU07307 NCU07308 NCU03006 NCU03922 NCU02056 NCU06785 NCU09497 NCU01376 NCU06054 NCU05259	400	3.97	2.11587	5.3855e-06
42.10.03 organization of chromosome structure	15	3.15	NCU01422 NCU00212 NCU03396 NCU01635 NCU09436 NCU04173 NCU02435 NCU00635 NCU01438 NCU06679 NCU01634 NCU06943 NCU07459 NCU02437 NCU03148	82	0.81	3.88889	5.66496e-06
34.01.01 homeostasis of cations	22	4.62	NCU03257 NCU00644 NCU08325 NCU09143 NCU02250 NCU09119 NCU01904 NCU09265 NCU20352 NCU02514 NCU08693 NCU01065 NCU05430 NCU03199 NCU08225 NCU09564 NCU09602 NCU01680 NCU03561 NCU04421 NCU00227 NCU00385	165	1.63	2.83436	9.8846e-06
02.45 energy conversion and regeneration	12	2.52	NCU03857 NCU04452 NCU09816 NCU06441 NCU02514 NCU05430 NCU09143 NCU00385 NCU00644 NCU09119 NCU02250 NCU02056	57	0.56	4.5	1.10076e-05
02.45.15 energy generation (e.g. ATP synthase)	8	1.68	NCU00385 NCU09816 NCU09143 NCU00644 NCU02250 NCU02514 NCU09119 NCU05430	25	0.24	7	1.25004e-05
34.01.01.03 homeostasis of protons	10	2.1	NCU03199 NCU02250 NCU00385 NCU09143 NCU05430 NCU08325 NCU01680 NCU00644 NCU09119 NCU02514	42	0.41	5.12195	1.90787e-05
34.01 homeostasis	23	4.83	NCU01680 NCU09564 NCU09602 NCU01065 NCU09265 NCU09143 NCU05430 NCU00385 NCU03199 NCU02250 NCU08693 NCU08225 NCU09119 NCU00227 NCU01904 NCU03257 NCU02514 NCU00644 NCU05390 NCU04421 NCU20352 NCU08325 NCU03561	186	1.84	2.625	2.17939e-05
40.01 cell growth / morphogenesis	23	4.83	NCU07253 NCU06815 NCU04173 NCU09937 NCU00202 NCU05889 NCU06679 NCU08323 NCU20075 NCU03515 NCU01083 NCU03117 NCU05269 NCU06561 NCU06694 NCU08340 NCU09995 NCU01290 NCU00925 NCU06970 NCU08297 NCU20488 NCU02464	186	1.84	2.625	2.17939e-05
14.01 protein folding and stabilization	14	2.94	NCU04142 NCU11311 NCU06279 NCU21431 NCU01589 NCU04334 NCU09265 NCU08693 NCU01792 NCU05269 NCU00465 NCU07414 NCU03241 NCU09602	81	0.8	3.675	2.27727e-05
01.06.05 fatty acid metabolism	13	2.73	NCU08535 NCU02571 NCU01904 NCU03857 NCU07307 NCU06785 NCU07308 NCU04899 NCU02505 NCU06783 NCU05259 NCU08943 NCU06694	71	0.7	3.9	2.35399e-05
01.01.03.01.02 degradation of glutamine	5	1.05	NCU02677 NCU03347 NCU08287 NCU07732 NCU07307	9	0.08	13.125	2.49107e-05
34 INTERACTION WITH THE ENVIRONMENT	43	9.03	NCU09468 NCU06679 NCU05269 NCU03257 NCU09119 NCU08225 NCU20352 NCU05430 NCU08693 NCU09564 NCU00227 NCU01233 NCU00385 NCU02250 NCU04142 NCU06694 NCU04510 NCU05390 NCU20488 NCU01528 NCU05168 NCU08297 NCU04173 NCU09143 NCU09265 NCU09602 NCU02514 NCU00261 NCU03515 NCU08340 NCU03561 NCU01904 NCU08325 NCU01065 NCU01680 NCU09132 NCU03199 NCU06561 NCU00644 NCU07690 NCU02464 NCU04054 NCU04421	473	4.69	1.92537	2.60033e-05
02.11 electron transport and membrane-associated energy conservation	17	3.57	NCU02549 NCU01680 NCU02534 NCU02056 NCU04768 NCU02514 NCU01904 NCU00385 NCU05457 NCU09816 NCU09119 NCU06695 NCU06606 NCU03340 NCU02250 NCU01808 NCU05430	116	1.15	3.10435	2.96015e-05
01.20.15 metabolism of derivatives of dehydroquinic acid, shikimic acid and chorismic acid	7	1.47	NCU01632 NCU02305 NCU10042 NCU01904 NCU05420 NCU07725 NCU09817	21	0.2	7.35	3.2975e-05
16.21.01 heme binding	7	1.47	NCU01808 NCU02624 NCU09816 NCU00355 NCU06695 NCU08663 NCU03492	21	0.2	7.35	3.2975e-05
01.20.17 metabolism of secondary products derived from primary amino acids	9	1.89	NCU05410 NCU01271 NCU06727 NCU10468 NCU02056 NCU00567 NCU01083 NCU01233 NCU04510	37	0.36	5.25	4.16561e-05
42.01 cell wall	20	4.2	NCU05238 NCU08228 NCU09937 NCU04173 NCU05680 NCU08909 NCU08297 NCU06727 NCU00261 NCU08693 NCU03515 NCU07253 NCU09602 NCU09903 NCU00957 NCU01271 NCU05789 NCU02464 NCU10468 NCU05974	156	1.54	2.72727	4.43341e-05
01.01.05.03 metabolism of urea (urea cycle)	5	1.05	NCU09532 NCU08287 NCU05977 NCU08162 NCU02639	10	0.09	11.6667	4.78862e-05
11.02 RNA synthesis	46	9.66	NCU07829 NCU09995 NCU02533 NCU05994 NCU08923 NCU01612 NCU05889 NCU09436 NCU01369 NCU01635 NCU03148 NCU02437 NCU01638 NCU07839 NCU02671 NCU06485 NCU00212 NCU03669 NCU03702 NCU08968 NCU07700 NCU01234 NCU03396 NCU02435 NCU04173 NCU04508 NCU09349 NCU00419 NCU07166 NCU01422 NCU08807 NCU09380 NCU00768 NCU03061 NCU08951 NCU20075 NCU00925 NCU00635 NCU01634 NCU01257 NCU09076 NCU00405 NCU04050 NCU01331 NCU…	533	5.29	1.82609	4.96575e-05
02.11.05 accessory proteins of electron transport and membrane-associated energy conservation	9	1.89	NCU03340 NCU02534 NCU02549 NCU01808 NCU06695 NCU01904 NCU04768 NCU06606 NCU09816	38	0.37	5.10811	5.23279e-05
10.01.09.05 DNA conformation modification (e.g. chromatin)	16	3.36	NCU09349 NCU09436 NCU01634 NCU04173 NCU00212 NCU01635 NCU02437 NCU00635 NCU09995 NCU03396 NCU02435 NCU01438 NCU01422 NCU03148 NCU06679 NCU06943	110	1.09	3.08257	5.55187e-05
32.01.05 heat shock response	9	1.89	NCU00465 NCU07414 NCU09602 NCU04510 NCU05269 NCU04334 NCU04142 NCU08693 NCU01589	39	0.38	4.97368	6.5216e-05
12.04.03 translation termination	4	0.84	NCU03148 NCU00635 NCU04790 NCU00410	6	0.05	16.8	6.86539e-05
20.01.01.07 anion transport	8	1.68	NCU03257 NCU05075 NCU08325 NCU09564 NCU05390 NCU01065 NCU08743 NCU07884	31	0.3	5.6	7.09382e-05
10.01.09 DNA restriction or modification	16	3.36	NCU02435 NCU01635 NCU03148 NCU06679 NCU04173 NCU03396 NCU06943 NCU09436 NCU09349 NCU01438 NCU01634 NCU01422 NCU00212 NCU02437 NCU09995 NCU00635	113	1.12	3	7.73596e-05
01.05.13.01 S-adenosyl-methionine - homocysteine cycle	5	1.05	NCU07459 NCU07930 NCU08968 NCU02657 NCU03347	11	0.1	10.5	8.43852e-05
14.10 assembly of protein complexes	20	4.2	NCU02464 NCU09143 NCU04173 NCU07956 NCU08340 NCU09602 NCU08693 NCU03515 NCU09521 NCU01438 NCU06679 NCU04054 NCU02477 NCU09265 NCU02305 NCU09132 NCU09468 NCU07659 NCU07308 NCU08297	165	1.63	2.57669	9.85772e-05
10.01 DNA processing	32	6.72	NCU01369 NCU09436 NCU02066 NCU00635 NCU03148 NCU06943 NCU02437 NCU06679 NCU01422 NCU07839 NCU01635 NCU00465 NCU04173 NCU09602 NCU00212 NCU01234 NCU02435 NCU09239 NCU07414 NCU01612 NCU01634 NCU01438 NCU03539 NCU02098 NCU09349 NCU03396 NCU09076 NCU20488 NCU01689 NCU10053 NCU09995 NCU08693	333	3.3	2.03636	0.000102878
10.03.05 cell cycle dependent cytoskeleton reorganization	8	1.68	NCU02464 NCU08297 NCU03515 NCU09468 NCU07380 NCU04173 NCU04054 NCU09132	33	0.32	5.25	0.000114853
16.17.09 heavy metal binding (Cu, Fe, Zn)	20	4.2	NCU00465 NCU00643 NCU07414 NCU08923 NCU08663 NCU01546 NCU07930 NCU03492 NCU02549 NCU04173 NCU06207 NCU06695 NCU09264 NCU02624 NCU09816 NCU00227 NCU01638 NCU20769 NCU01808 NCU08287	167	1.65	2.54545	0.000116634
01.05.02 sugar, glucoside, polyol and carboxylate metabolism	19	3.99	NCU00643 NCU07697 NCU09111 NCU06666 NCU20769 NCU01692 NCU10042 NCU02954 NCU04280 NCU01528 NCU02136 NCU08228 NCU06075 NCU04899 NCU08162 NCU04510 NCU01233 NCU01227 NCU03857	156	1.54	2.59091	0.000137348
02.07 pentose-phosphate pathway	8	1.68	NCU01904 NCU06970 NCU09111 NCU00087 NCU01786 NCU03100 NCU06142 NCU02136	34	0.33	5.09091	0.000144058
10.03 cell cycle	36	7.56	NCU01634 NCU08944 NCU04054 NCU09132 NCU20488 NCU04754 NCU04847 NCU06679 NCU01438 NCU01998 NCU04142 NCU01290 NCU07414 NCU02208 NCU02464 NCU02435 NCU20005 NCU03515 NCU08693 NCU04288 NCU00465 NCU05304 NCU00212 NCU01550 NCU01504 NCU04790 NCU09602 NCU02437 NCU02668 NCU00925 NCU09468 NCU04173 NCU08297 NCU02076 NCU07380 NCU09733	403	4	1.89	0.000170269
32 CELL RESCUE, DEFENSE AND VIRULENCE	48	10	NCU09265 NCU00355 NCU08693 NCU03061 NCU07414 NCU08380 NCU06031 NCU01233 NCU00635 NCU03297 NCU04054 NCU04510 NCU06279 NCU00465 NCU04173 NCU04410 NCU07459 NCU08277 NCU09111 NCU05278 NCU01792 NCU09602 NCU01904 NCU09468 NCU07569 NCU01940 NCU01808 NCU04142 NCU01083 NCU06550 NCU09733 NCU06549 NCU01589 NCU02056 NCU07956 NCU02624 NCU02437 NCU02627 NCU09132 NCU04334 NCU03857 NCU05269 NCU03148 NCU21431 NCU…	594	5.9	1.69492	0.000171123
12.07 translational control	10	2.1	NCU06099 NCU08277 NCU04799 NCU09076 NCU08046 NCU00635 NCU02076 NCU01612 NCU03826 NCU01234	54	0.53	3.96226	0.00018631
41 DEVELOPMENT (Systemic)	9	1.89	NCU04054 NCU03515 NCU09380 NCU08297 NCU09602 NCU02464 NCU09468 NCU08693 NCU09132	45	0.44	4.29545	0.000211813
41.01 fungal/microorganismic development	9	1.89	NCU08693 NCU04054 NCU03515 NCU09602 NCU09468 NCU02464 NCU09132 NCU08297 NCU09380	45	0.44	4.29545	0.000211813
01.05.02.07 sugar, glucoside, polyol and carboxylate catabolism	16	3.36	NCU01528 NCU08162 NCU01227 NCU01692 NCU00643 NCU03857 NCU09111 NCU07697 NCU02954 NCU01233 NCU10042 NCU02136 NCU04280 NCU04510 NCU04899 NCU06075	124	1.23	2.73171	0.000234938
01.01.06.05.01 biosynthesis of methionine	6	1.26	NCU04077 NCU07987 NCU05238 NCU06512 NCU07690 NCU09896	20	0.19	6.63158	0.000238034
01.01.09.06 metabolism of tryptophan	7	1.47	NCU05752 NCU01632 NCU03347 NCU07725 NCU06970 NCU01786 NCU05420	28	0.27	5.44444	0.000251656
20.09.05 non-vesicular ER transport	4	0.84	NCU08379 NCU09602 NCU08693 NCU04127	8	0.07	12	0.00029688
16.21.17 pyridoxal phosphate binding	7	1.47	NCU06452 NCU06189 NCU20459 NCU07987 NCU02274 NCU03347 NCU04754	29	0.28	5.25	0.000318378
16.17.07 magnesium binding	9	1.89	NCU06075 NCU10042 NCU09789 NCU06054 NCU07982 NCU06785 NCU04334 NCU02657 NCU06970	48	0.47	4.02128	0.00035338
32.05.01.07 electromagnetic waves resistance (e.g. UV)	3	0.63	NCU04054 NCU09132 NCU09468	4	0.03	21	0.000405612
14.04 protein targeting, sorting and translocation	21	4.41	NCU04288 NCU01179 NCU04334 NCU09143 NCU20611 NCU08379 NCU03148 NCU08535 NCU04245 NCU00465 NCU04173 NCU04127 NCU07414 NCU08693 NCU01589 NCU04307 NCU06632 NCU11311 NCU00431 NCU09602 NCU08340	203	2.01	2.19403	0.000607523
20.01.01.01 cation transport (H+, Na+, K+, Ca2+ , NH4+, etc.)	15	3.15	NCU20352 NCU01065 NCU00790 NCU03561 NCU00227 NCU03257 NCU00385 NCU02423 NCU08325 NCU08225 NCU02514 NCU01680 NCU09119 NCU02250 NCU05430	122	1.21	2.60331	0.000615581
43.03 animal cell type differentiation	5	1.05	NCU09602 NCU06679 NCU08693 NCU01369 NCU01422	16	0.15	7	0.000655059
43 CELL TYPE DIFFERENTIATION	26	5.46	NCU01418 NCU04142 NCU06694 NCU06679 NCU03515 NCU09602 NCU00202 NCU03257 NCU09995 NCU02076 NCU02208 NCU06561 NCU01369 NCU02629 NCU08693 NCU08909 NCU05304 NCU08332 NCU01422 NCU08297 NCU01083 NCU02464 NCU04173 NCU09937 NCU01065 NCU01438	280	2.78	1.96403	0.00076353
20.01.01.07.07 phosphate transport	4	0.84	NCU09564 NCU05390 NCU08743 NCU08325	10	0.09	9.33333	0.000825501
10.03.01.01.11 M phase	8	1.68	NCU09132 NCU00925 NCU04054 NCU09468 NCU01438 NCU04288 NCU20488 NCU04173	44	0.43	3.90698	0.000927991
01.05.05.04 C-1 compound anabolism	3	0.63	NCU02657 NCU02274 NCU07930	5	0.04	15.75	0.000978367
02.07.01 pentose-phosphate pathway oxidative branch	3	0.63	NCU09111 NCU03100 NCU00087	5	0.04	15.75	0.000978367
16.21.15 biotin binding	3	0.63	NCU02505 NCU08535 NCU07659	5	0.04	15.75	0.000978367
34.01.03.03 homeostasis of phosphate	3	0.63	NCU05390 NCU09564 NCU08325	5	0.04	15.75	0.000978367
16.21.08 Fe/S binding	6	1.26	NCU02534 NCU04768 NCU08923 NCU06606 NCU02549 NCU04280	26	0.25	5.04	0.00111027
20.01.10 protein transport	14	2.94	NCU06632 NCU07414 NCU01589 NCU00465 NCU11311 NCU04127 NCU09602 NCU04288 NCU01179 NCU08693 NCU00635 NCU08379 NCU08340 NCU04173	118	1.17	2.51282	0.00131663
01.01.09.02 metabolism of serine	5	1.05	NCU04118 NCU21057 NCU03935 NCU00554 NCU02274	19	0.18	5.83333	0.00155015
12.04.02 translation elongation	5	1.05	NCU03826 NCU09903 NCU02003 NCU03737 NCU07700	19	0.18	5.83333	0.00155015
01.01.06.04 metabolism of threonine	4	0.84	NCU03935 NCU00554 NCU03425 NCU04118	12	0.11	7.63636	0.00180397
10.03.01 mitotic cell cycle and cell cycle control	26	5.46	NCU01438 NCU02208 NCU09132 NCU00465 NCU01290 NCU04847 NCU09733 NCU02076 NCU04288 NCU04754 NCU04173 NCU00925 NCU20488 NCU02464 NCU04790 NCU09468 NCU05304 NCU08297 NCU08693 NCU08944 NCU09602 NCU07414 NCU03515 NCU02668 NCU02437 NCU04054	298	2.96	1.84459	0.00188228
01.01.05.01.01 biosynthesis of polyamines	3	0.63	NCU06727 NCU01083 NCU01271	6	0.05	12.6	0.00188808
01.20.17.03 metabolism of amines	3	0.63	NCU01083 NCU06727 NCU01271	6	0.05	12.6	0.00188808
02.08 pyruvate dehydrogenase complex	3	0.63	NCU07659 NCU03004 NCU06482	6	0.05	12.6	0.00188808
02.13.01 anaerobic respiration	3	0.63	NCU09143 NCU05457 NCU09477	6	0.05	12.6	0.00188808
20.09.14.01 tubulin dependent transport	3	0.63	NCU09132 NCU04054 NCU09468	6	0.05	12.6	0.00188808
20.03.22 transport ATPases	9	1.89	NCU00385 NCU09119 NCU00644 NCU03199 NCU02250 NCU01680 NCU20352 NCU05430 NCU02514	62	0.61	3.09836	0.00237947
20.09.01 nuclear transport	9	1.89	NCU08535 NCU01234 NCU20611 NCU09602 NCU02066 NCU08663 NCU08693 NCU03066 NCU04288	62	0.61	3.09836	0.00237947
10.03.04 nuclear and chromosomal cycle	10	2.1	NCU04054 NCU04288 NCU09132 NCU02435 NCU01634 NCU02437 NCU00212 NCU20488 NCU09468 NCU06679	74	0.73	2.87671	0.00240396
40.10.02.01 anti-apoptosis	4	0.84	NCU06464 NCU09602 NCU02003 NCU08693	13	0.12	7	0.00250919
40.10 cell death	9	1.89	NCU06464 NCU09436 NCU09602 NCU04304 NCU02468 NCU01589 NCU08693 NCU02003 NCU09264	63	0.62	3.04839	0.00266275
01.01.06.05.01.01 biosynthesis of homocysteine	3	0.63	NCU04077 NCU05238 NCU07987	7	0.06	10.5	0.00318849
16.13.01 sugar binding	3	0.63	NCU08944 NCU06099 NCU09265	7	0.06	10.5	0.00318849
11.06 RNA modification	7	1.47	NCU08968 NCU03396 NCU05301 NCU01290 NCU03669 NCU03702 NCU06943	42	0.41	3.58537	0.00323532
01.01.09.07.01 biosynthesis of histidine	4	0.84	NCU09320 NCU01300 NCU01786 NCU06970	14	0.13	6.46154	0.00338293
01.03.04.03 pyrimidine nucleotide/nucleoside/nucleobase anabolism	4	0.84	NCU00261 NCU06970 NCU10053 NCU01786	14	0.13	6.46154	0.00338293
10.03.01.01 mitotic cell cycle	12	2.52	NCU04054 NCU04754 NCU04173 NCU04288 NCU00465 NCU01438 NCU04790 NCU09132 NCU09468 NCU20488 NCU00925 NCU07414	104	1.03	2.4466	0.0035962
01.01.05.01 metabolism of polyamines	4	0.84	NCU01083 NCU01271 NCU06727 NCU02056	15	0.14	6	0.00444276
01.20.17.01 metabolism of nonprotein amino acids	4	0.84	NCU10468 NCU05410 NCU00567 NCU02056	15	0.14	6	0.00444276
18.02 regulation of protein activity	19	3.99	NCU01422 NCU06679 NCU07414 NCU08277 NCU08693 NCU03826 NCU00635 NCU07839 NCU00410 NCU01666 NCU09239 NCU02003 NCU09602 NCU00692 NCU03061 NCU06561 NCU00465 NCU08340 NCU20488	211	2.09	1.90909	0.00526468
10.03.05.01 spindle pole body/centrosome and microtubule cycle	5	1.05	NCU09468 NCU04054 NCU04173 NCU09132 NCU07380	25	0.24	4.375	0.00560444
01.01.09.07 metabolism of histidine	4	0.84	NCU01786 NCU06970 NCU01300 NCU09320	16	0.15	5.6	0.00570532
01.01.06.06.01.01 diaminopimelic acid pathway	2	0.42	NCU05977 NCU09532	3	0.02	21	0.00648479
01.03.01.01.03 xanthine catabolism	2	0.42	NCU03117 NCU01428	3	0.02	21	0.00648479
01.20.01.01 metabolism of secondary monosaccharides	2	0.42	NCU06666 NCU00643	3	0.02	21	0.00648479
18 REGULATION OF METABOLISM AND PROTEIN FUNCTION	19	3.99	NCU20488 NCU06679 NCU03826 NCU00465 NCU08693 NCU08340 NCU01422 NCU01666 NCU09239 NCU02003 NCU00635 NCU00410 NCU00692 NCU07414 NCU07839 NCU08277 NCU03061 NCU09602 NCU06561	216	2.14	1.86449	0.00674622
40.01.03 directional cell growth (morphogenesis)	8	1.68	NCU20488 NCU20075 NCU06815 NCU09937 NCU05269 NCU07253 NCU00925 NCU06561	60	0.59	2.84746	0.00692782
01.05.11.04 aromate anabolism	3	0.63	NCU09817 NCU01632 NCU02785	9	0.08	7.875	0.00712796
20.01.26 neurotransmitter transport	3	0.63	NCU02464 NCU03515 NCU08297	9	0.08	7.875	0.00712796
01.20.19.01 metabolism of porphyrins	4	0.84	NCU01546 NCU03561 NCU20511 NCU06189	17	0.16	5.25	0.00718627
10.03.04.03 chromosome condensation	4	0.84	NCU01634 NCU02435 NCU00212 NCU02437	17	0.16	5.25	0.00718627
30.05.02.24 G-protein coupled receptor signalling pathway	4	0.84	NCU08340 NCU09132 NCU04054 NCU09468	17	0.16	5.25	0.00718627
01.03.16.01 RNA degradation	5	1.05	NCU04790 NCU07547 NCU07839 NCU09076 NCU03061	27	0.26	4.03846	0.00787975
30.05.02 non-enzymatic receptor mediated signalling	5	1.05	NCU09468 NCU09132 NCU04054 NCU20488 NCU08340	27	0.26	4.03846	0.00787975
12.10 aminoacyl-tRNA-synthetases	6	1.26	NCU04307 NCU09463 NCU00915 NCU00405 NCU05095 NCU04020	38	0.37	3.40541	0.00824416
10.03.02 meiosis	9	1.89	NCU02437 NCU08693 NCU04142 NCU04054 NCU01504 NCU09468 NCU20488 NCU09132 NCU09602	75	0.74	2.55405	0.00858639
14 PROTEIN FATE (folding, modification, destination)	56	11.7	NCU05680 NCU01179 NCU09143 NCU08693 NCU11311 NCU01940 NCU08297 NCU04245 NCU08380 NCU08323 NCU08535 NCU09468 NCU03515 NCU04142 NCU01792 NCU03713 NCU02549 NCU04288 NCU06279 NCU21431 NCU05889 NCU00465 NCU20488 NCU06679 NCU01808 NCU05269 NCU08944 NCU02464 NCU01589 NCU04334 NCU20611 NCU05836 NCU04127 NCU04173 NCU07414 NCU08379 NCU04054 NCU06512 NCU00431 NCU02305 NCU03241 NCU09521 NCU06632 NCU01438 NCU…	862	8.56	1.36682	0.00862586
43.01.03.05 budding, cell polarity and filament formation	14	2.94	NCU06561 NCU09995 NCU01438 NCU00202 NCU05304 NCU01065 NCU04173 NCU03515 NCU02464 NCU08297 NCU06694 NCU03257 NCU09937 NCU08909	145	1.44	2.04167	0.00864642
34.05 cell motility	7	1.47	NCU01528 NCU04173 NCU08340 NCU08297 NCU09468 NCU04054 NCU09132	51	0.5	2.94	0.00964333
10.01.05.01 DNA repair	14	2.94	NCU03539 NCU02437 NCU02066 NCU09239 NCU10053 NCU07839 NCU01234 NCU01612 NCU02098 NCU09076 NCU20488 NCU09436 NCU01369 NCU06679	147	1.46	2.0137	0.00970586
01.01.06.01 metabolism of aspartate	3	0.63	NCU02639 NCU08162 NCU09789	10	0.09	7	0.00982901
01.01.09.04 metabolism of phenylalanine	5	1.05	NCU01632 NCU03283 NCU05420 NCU03347 NCU07725	29	0.28	3.75	0.0107277
01.01.09.05 metabolism of tyrosine	5	1.05	NCU05420 NCU07725 NCU03283 NCU03347 NCU01632	29	0.28	3.75	0.0107277
01.20.19 metabolism of secondary products derived from glycine, L-serine and L-alanine	4	0.84	NCU20511 NCU01546 NCU06189 NCU03561	19	0.18	4.66667	0.0108601
42.04 cytoskeleton/structural proteins	13	2.73	NCU06441 NCU09937 NCU04173 NCU08297 NCU09468 NCU06561 NCU02464 NCU09132 NCU03515 NCU08340 NCU04054 NCU00202 NCU01290	136	1.35	2.02222	0.0120909
16.07 structural protein binding	5	1.05	NCU04173 NCU04054 NCU04288 NCU09132 NCU09468	30	0.29	3.62069	0.0123854
01.01.06.05.02 degradation of methionine	2	0.42	NCU06512 NCU02657	4	0.03	14	0.012564
16.17.03 potassium binding	2	0.42	NCU02657 NCU03117	4	0.03	14	0.012564
11.02.03 mRNA synthesis	33	6.93	NCU03148 NCU08923 NCU01635 NCU08807 NCU01331 NCU07829 NCU00635 NCU09349 NCU03061 NCU04173 NCU04508 NCU09995 NCU01634 NCU07700 NCU00768 NCU02437 NCU01612 NCU05994 NCU06679 NCU01369 NCU02671 NCU01422 NCU00212 NCU07839 NCU04050 NCU09436 NCU03702 NCU05889 NCU02435 NCU00405 NCU03669 NCU01638 NCU09380	465	4.61	1.50325	0.0126158
01.03.10 metabolism of cyclic and unusual nucleotides	3	0.63	NCU01290 NCU01985 NCU04019	11	0.1	6.3	0.0130465
16.09 lipid binding	4	0.84	NCU02250 NCU02464 NCU03515 NCU08297	20	0.19	4.42105	0.0130782
16.13 C-compound binding	4	0.84	NCU06099 NCU02056 NCU08944 NCU09265	21	0.2	4.2	0.0155652
14.07.04 modification by acetylation, deacetylation	5	1.05	NCU01808 NCU04173 NCU08944 NCU04334 NCU06679	32	0.31	3.3871	0.0162032
20.01.21 RNA transport	5	1.05	NCU07459 NCU04799 NCU09076 NCU01234 NCU04288	32	0.31	3.3871	0.0162032
01.03.16 polynucleotide degradation	6	1.26	NCU07839 NCU04790 NCU03061 NCU09076 NCU08332 NCU07547	44	0.43	2.93023	0.0166263
01.01.06.06.02 degradation of lysine	3	0.63	NCU03748 NCU02274 NCU02571	12	0.11	5.72727	0.016794
01.05.05 C-1 compound metabolism	3	0.63	NCU07930 NCU02657 NCU02274	12	0.11	5.72727	0.016794
34.11.01 photoperception and response	3	0.63	NCU09468 NCU09132 NCU04054	12	0.11	5.72727	0.016794
43.01 fungal/microorganismic cell type differentiation	21	4.41	NCU01418 NCU02076 NCU08909 NCU02464 NCU04173 NCU01083 NCU08332 NCU02629 NCU04142 NCU09937 NCU08297 NCU05304 NCU01438 NCU02208 NCU01065 NCU06561 NCU09995 NCU06694 NCU03257 NCU03515 NCU00202	270	2.68	1.64552	0.0171603
43.01.03 fungal and other eukaryotic cell type differentiation	21	4.41	NCU04173 NCU02629 NCU01083 NCU04142 NCU08909 NCU09995 NCU06694 NCU02208 NCU02464 NCU01418 NCU00202 NCU08297 NCU01065 NCU03515 NCU09937 NCU06561 NCU05304 NCU08332 NCU02076 NCU03257 NCU01438	270	2.68	1.64552	0.0171603
40.10.02 apoptosis (type I programmed cell death)	7	1.47	NCU09436 NCU02003 NCU08693 NCU09602 NCU09264 NCU04304 NCU06464	57	0.56	2.625	0.0172991
01.01.06.04.01 biosynthesis of threonine	2	0.42	NCU03935 NCU03425	5	0.04	10.5	0.0202877
16.21.11 thiamine pyrophosphate binding	2	0.42	NCU07982 NCU06482	5	0.04	10.5	0.0202877
20.03.09 phosphotransferase system	2	0.42	NCU06075 NCU01550	5	0.04	10.5	0.0202877
32.07.07.05 peroxidase reaction	2	0.42	NCU03297 NCU06031	5	0.04	10.5	0.0202877
10.03.04.05 chromosome segregation/division	5	1.05	NCU04288 NCU20488 NCU04054 NCU09468 NCU09132	34	0.33	3.18182	0.0207324
01.01.09.03 metabolism of cysteine	3	0.63	NCU06452 NCU07987 NCU02430	13	0.12	5.25	0.0210795
01.01.09.06.01 biosynthesis of tryptophan	3	0.63	NCU03347 NCU01786 NCU06970	13	0.12	5.25	0.0210795
01.01.11.04.02 degradation of leucine	3	0.63	NCU04385 NCU04754 NCU20459	13	0.12	5.25	0.0210795
18.02.01 enzymatic activity regulation / enzyme regulator	14	2.94	NCU03826 NCU03061 NCU07414 NCU08340 NCU06679 NCU00465 NCU00692 NCU09239 NCU02003 NCU08693 NCU06561 NCU09602 NCU01666 NCU00410	167	1.65	1.78182	0.0267812
01.03.01.01 purine nucleotide /nucleoside/nucleobase catabolism	2	0.42	NCU01428 NCU03117	6	0.05	8.4	0.0294875
10.01.05.03 DNA recombination	6	1.26	NCU01612 NCU01234 NCU09076 NCU07839 NCU02437 NCU01369	50	0.49	2.57143	0.0295674
18.02.01.01.01 GTPase activator (GAP)	3	0.63	NCU03826 NCU00410 NCU02003	15	0.14	4.5	0.0312716
43.01.03.09 development of asco- basidio- or zygospore	9	1.89	NCU01083 NCU02076 NCU06694 NCU02629 NCU01418 NCU04173 NCU03515 NCU02208 NCU04142	93	0.92	2.05435	0.0313741
20.09.14 cytoskeleton-dependent transport	5	1.05	NCU04173 NCU01998 NCU09132 NCU04054 NCU09468	38	0.37	2.83784	0.0320902
10.03.03 cytokinesis (cell division) /septum formation and hydrolysis	9	1.89	NCU04173 NCU01438 NCU01998 NCU03515 NCU08297 NCU02464 NCU01550 NCU05304 NCU20005	94	0.93	2.03226	0.0333079
01.01.11.02.02 degradation of isoleucine	2	0.42	NCU20459 NCU04754	7	0.06	7	0.0400071
20.01.03.03 C4-dicarboxylate transport (e.g. malate, succinate, fumarate)	2	0.42	NCU04837 NCU07884	7	0.06	7	0.0400071
20.09.14.02 actin dependent transport	2	0.42	NCU01998 NCU04173	7	0.06	7	0.0400071
42.10.05 nuclear membrane	2	0.42	NCU04288 NCU08535	7	0.06	7	0.0400071
11.04.03 mRNA processing (splicing, 5'-, 3'-end processing)	14	2.94	NCU07547 NCU02423 NCU04410 NCU07839 NCU07670 NCU01369 NCU04799 NCU01234 NCU07700 NCU03061 NCU01612 NCU01331 NCU03702 NCU09076	177	1.75	1.68	0.040941
10.01.02 DNA topology	6	1.26	NCU07839 NCU01612 NCU01234 NCU09076 NCU01369 NCU02437	54	0.53	2.37736	0.0411059
20.09.16.09 vesicular cellular export	4	0.84	NCU03515 NCU08297 NCU04173 NCU02464	28	0.27	3.11111	0.0411165
20.09.16.09.03 exocytosis	4	0.84	NCU02464 NCU04173 NCU08297 NCU03515	28	0.27	3.11111	0.0411165
01.20.01 metabolism of primary metabolic sugar derivatives	3	0.63	NCU00643 NCU06666 NCU01904	17	0.16	3.9375	0.0435969
20.01.17 nucleotide/nucleoside/nucleobase transport	3	0.63	NCU07334 NCU09477 NCU03561	17	0.16	3.9375	0.0435969
01.02.03.03 assimilatory reduction of sulfur	1	0.21	NCU02005	1	0	0	0.0472879
01.02.03.04 conjunction of sulfate	1	0.21	NCU01985	1	0	0	0.0472879
01.20.19.03 metabolism of open-chain tetrapyrrols	1	0.21	NCU06189	1	0	0	0.0472879
01.20.19.05 metabolism of cobalamins	1	0.21	NCU20511	1	0	0	0.0472879
01.20.23 metabolism of secondary products derived from L-methionine	1	0.21	NCU01083	1	0	0	0.0472879
20.03.02.02.02 sodium driven symporter	1	0.21	NCU09564	1	0	0	0.0472879
40.01.01 non-directional cell growth	1	0.21	NCU03117	1	0	0	0.0472879
40.10.02.02.01 apoptotic mitochondrial changes	1	0.21	NCU04304	1	0	0	0.0472879
02.16 fermentation	6	1.26	NCU02056 NCU04280 NCU03004 NCU07042 NCU06441 NCU04510	56	0.55	2.29091	0.0478072
10.01.05 DNA recombination and DNA repair	14	2.94	NCU07839 NCU06679 NCU10053 NCU20488 NCU02437 NCU02098 NCU09239 NCU09436 NCU02066 NCU09076 NCU01234 NCU03539 NCU01369 NCU01612	181	1.79	1.64246	0.0478743
10.01.03 DNA synthesis and replication	9	1.89	NCU07414 NCU08693 NCU00465 NCU01689 NCU09602 NCU03539 NCU06679 NCU10053 NCU09239	101	1	1.89	0.0491785
34.01.03 homeostasis of anions	3	0.63	NCU09564 NCU08325 NCU05390	18	0.17	3.70588	0.0505363
01.01.03.05.02 degradation of arginine	2	0.42	NCU08162 NCU07732	8	0.07	6	0.0517017
11.04.03.11 control of mRNA stability	2	0.42	NCU04799 NCU03061	8	0.07	6	0.0517017
16.06 motor protein binding	2	0.42	NCU04173 NCU00202	8	0.07	6	0.0517017
18.02.01.01 enzyme activator	7	1.47	NCU00410 NCU08340 NCU03826 NCU00692 NCU07414 NCU02003 NCU00465	72	0.71	2.07042	0.0530413
11.04.02 tRNA processing	4	0.84	NCU04410 NCU00087 NCU08295 NCU07839	31	0.3	2.8	0.0566193
32.07.07 oxygen and radical detoxification	4	0.84	NCU06031 NCU00355 NCU03857 NCU03297	31	0.3	2.8	0.0566193
40.20 cell aging	3	0.63	NCU09733 NCU02668 NCU05430	19	0.18	3.5	0.0579756
20.01.01.01.01 heavy metal ion transport (Cu+, Fe3+, etc.)	5	1.05	NCU03561 NCU08325 NCU08225 NCU00227 NCU02423	45	0.44	2.38636	0.0598863
01.01.09.03.01 biosynthesis of cysteine	2	0.42	NCU06452 NCU07987	9	0.08	5.25	0.064437
01.01.11.03.02 degradation of valine	2	0.42	NCU20459 NCU04754	9	0.08	5.25	0.064437
10.03.04.09 nuclear migration	3	0.63	NCU04054 NCU09468 NCU09132	20	0.19	3.31579	0.0658986
34.11.09 temperature perception and response	3	0.63	NCU08693 NCU05269 NCU09602	21	0.2	3.15	0.0742875
30.05 transmembrane signal transduction	6	1.26	NCU07459 NCU09468 NCU20488 NCU09132 NCU08340 NCU04054	63	0.62	2.03226	0.0763128
01.01.09.02.01 biosynthesis of serine	2	0.42	NCU02274 NCU21057	10	0.09	4.66667	0.078089
01.05.05.07 C-1 compound catabolism	2	0.42	NCU07930 NCU02274	10	0.09	4.66667	0.078089
10.03.01.01.01 G1 phase of mitotic cell cycle	2	0.42	NCU00465 NCU07414	10	0.09	4.66667	0.078089
01.06.10 regulation of lipid, fatty acid and isoprenoid metabolism	3	0.63	NCU08535 NCU01422 NCU02274	22	0.21	3	0.0831229
11.02.03.04.01 transcription activation	4	0.84	NCU05994 NCU00635 NCU01422 NCU04050	36	0.35	2.4	0.0884134
11.04.03.01 splicing	10	2.1	NCU01331 NCU01612 NCU01369 NCU01234 NCU07839 NCU03702 NCU09076 NCU07700 NCU07670 NCU02423	131	1.3	1.61538	0.0914507
01.20.21 metabolism of sulfuric acid and L-cysteine derivatives	1	0.21	NCU02657	2	0.01	21	0.0923441
16.11 amino acid/amino acid derivatives binding	1	0.21	NCU00405	2	0.01	21	0.0923441
18.02.01.02 enzyme inhibitor	3	0.63	NCU06679 NCU03061 NCU06561	23	0.22	2.86364	0.0923841
01.01.09.06.02 degradation of tryptophan	2	0.42	NCU05752 NCU03347	11	0.1	4.2	0.0925429
20.03.02.02 symporter	2	0.42	NCU05390 NCU09564	11	0.1	4.2	0.0925429
11.02.02 tRNA synthesis	4	0.84	NCU02533 NCU04508 NCU00419 NCU09995	37	0.36	2.33333	0.0956208
18.01.07 regulation by binding / dissociation	5	1.05	NCU03061 NCU06561 NCU01422 NCU06679 NCU00635	52	0.51	2.05882	0.0979629
34.01.01.01 homeostasis of metal ions (Na, K, Ca etc.)	9	1.89	NCU01904 NCU08225 NCU09602 NCU20352 NCU04421 NCU00227 NCU08693 NCU09265 NCU03561	117	1.16	1.62931	0.102016
32.01.01 oxidative stress response	5	1.05	NCU03857 NCU06031 NCU09733 NCU00355 NCU03297	53	0.52	2.01923	0.10421
32.01.03 osmotic and salt stress response	5	1.05	NCU08380 NCU01940 NCU04173 NCU04510 NCU01233	53	0.52	2.01923	0.10421
34.11 cellular sensing and response to external stimulus	18	3.78	NCU04142 NCU05269 NCU04510 NCU01233 NCU07690 NCU00261 NCU09468 NCU08693 NCU05168 NCU04054 NCU08297 NCU09132 NCU09602 NCU20488 NCU02464 NCU03515 NCU06679 NCU06694	277	2.75	1.37455	0.106602
01.03.07 deoxyribonucleotide metabolism	2	0.42	NCU10053 NCU03539	12	0.11	3.81818	0.107693
01.05.02.01 nucleotide-sugar metabolism	2	0.42	NCU08228 NCU09111	12	0.11	3.81818	0.107693
16.17.01 calcium binding	3	0.63	NCU09265 NCU01241 NCU04421	25	0.24	2.625	0.112097
18.02.09 regulator of transcription factor	3	0.63	NCU07839 NCU00635 NCU01422	25	0.24	2.625	0.112097
30.01.05.05 G-protein mediated signal transduction	5	1.05	NCU08340 NCU20075 NCU06679 NCU05289 NCU06561	55	0.54	1.94444	0.117276
01.05.11 aromate metabolism	4	0.84	NCU09817 NCU02785 NCU01632 NCU02056	40	0.39	2.15385	0.118811
01.01.09.01.01 biosynthesis of glycine	2	0.42	NCU02274 NCU21057	13	0.12	3.5	0.123441
14.07.02 modification with sugar residues (e.g. glycosylation, deglycosylation)	5	1.05	NCU03713 NCU05680 NCU07338 NCU08340 NCU05836	56	0.55	1.90909	0.124087
20.03.02 carrier (electrochemical potential-driven transport)	3	0.63	NCU05390 NCU09477 NCU09564	27	0.26	2.42308	0.133247
20.01.03 C-compound and carbohydrate transport	8	1.68	NCU08325 NCU04837 NCU08407 NCU03561 NCU07884 NCU00227 NCU01689 NCU05075	107	1.06	1.58491	0.133483
02.09 anaplerotic reactions	1	0.21	NCU02505	3	0.02	10.5	0.135274
02.16.05 butyrate and butanol-acetoine fermentation	1	0.21	NCU03004	3	0.02	10.5	0.135274
10.03.04.01 centromere/kinetochore complex maturation	1	0.21	NCU06679	3	0.02	10.5	0.135274
18.02.01.02.01 GTPase inhibitor (GIP)	1	0.21	NCU06561	3	0.02	10.5	0.135274
30.01.05.05.01 small GTPase mediated signal transduction	4	0.84	NCU08340 NCU06679 NCU06561 NCU05289	44	0.43	1.95349	0.153056
42.04.05 microtubule cytoskeleton	4	0.84	NCU09132 NCU04054 NCU09468 NCU00202	44	0.43	1.95349	0.153056
11.02.03.04 transcriptional control	21	4.41	NCU01422 NCU04050 NCU07829 NCU05994 NCU08807 NCU00212 NCU00635 NCU02671 NCU09380 NCU07839 NCU03669 NCU02437 NCU03148 NCU01635 NCU08923 NCU04173 NCU01634 NCU02435 NCU06679 NCU09436 NCU09995	350	3.47	1.27089	0.155437
01.20.17.09 metabolism of alkaloids	2	0.42	NCU01233 NCU04510	15	0.14	3	0.156377
30.01.09 second messenger mediated signal transduction	4	0.84	NCU09468 NCU09132 NCU04054 NCU10053	45	0.44	1.90909	0.162145
01.01.03.02.02 degradation of glutamate	2	0.42	NCU07307 NCU04216	16	0.15	2.8	0.173406
01.01.06.02.01 biosynthesis of asparagine	1	0.21	NCU04303	4	0.03	7	0.176177
01.20.25 metabolism of secondary products derived from L-valin, L-leucin and L-isoleucin	1	0.21	NCU02571	4	0.03	7	0.176177
01.20.33 metabolism of secondary products derived from L-tryptophan	1	0.21	NCU03347	4	0.03	7	0.176177
02.16.11 propionate fermentation	1	0.21	NCU04280	4	0.03	7	0.176177
32.07.07.01 catalase reaction	1	0.21	NCU00355	4	0.03	7	0.176177
40.10.02.03.02 induction of apoptosis by intracellular signals	1	0.21	NCU09436	4	0.03	7	0.176177
42.03 cytoplasm	1	0.21	NCU04020	4	0.03	7	0.176177
01.01.09.01 metabolism of glycine	2	0.42	NCU21057 NCU02274	17	0.16	2.625	0.190714
10.03.01.02 cell cycle arrest	2	0.42	NCU07414 NCU00465	17	0.16	2.625	0.190714
18.02.05 regulator of G-protein signalling	2	0.42	NCU06679 NCU06561	17	0.16	2.625	0.190714
32.07.01 detoxification involving cytochrome P450	2	0.42	NCU05278 NCU02624	17	0.16	2.625	0.190714
01.01.13 regulation of amino acid metabolism	2	0.42	NCU04050 NCU09320	18	0.17	2.47059	0.208237
20.01.23 allantoin and allantoate transport	2	0.42	NCU07334 NCU08407	18	0.17	2.47059	0.208237
01.01.03.01.01 biosynthesis of glutamine	1	0.21	NCU09111	5	0.04	5.25	0.215149
01.01.09.05.01 biosynthesis of tyrosine	1	0.21	NCU03347	5	0.04	5.25	0.215149
01.20.15.03 metabolism of ubiquinone	1	0.21	NCU02305	5	0.04	5.25	0.215149
20.01.01.07.05 sulfate/sulfite transport	1	0.21	NCU07884	5	0.04	5.25	0.215149
20.09.07.06 post Golgi transport	1	0.21	NCU06694	5	0.04	5.25	0.215149
20.09.18.09.01.01 receptor-mediated endocytosis	1	0.21	NCU08340	5	0.04	5.25	0.215149
34.11.13 gas and metabolite distribution	1	0.21	NCU07690	5	0.04	5.25	0.215149
34.11.13.07 circulation (e.g. blood pressure)	1	0.21	NCU07690	5	0.04	5.25	0.215149
14.07.09 posttranslational modification of amino acids (e.g. hydroxylation, methylation)	3	0.63	NCU07459 NCU08340 NCU06512	34	0.33	1.90909	0.215908
34.11.03.13 osmosensing and response	3	0.63	NCU04510 NCU01233 NCU05168	35	0.34	1.85294	0.22851
20.01.07 amino acid/amino acid derivatives transport	3	0.63	NCU01241 NCU05168 NCU04837	36	0.35	1.8	0.241246
01.01.06.01.01 biosynthesis of aspartate	1	0.21	NCU09789	6	0.05	4.2	0.252282
01.01.06.01.02 degradation of aspartate	1	0.21	NCU09789	6	0.05	4.2	0.252282
01.01.06.02 metabolism of asparagine	1	0.21	NCU04303	6	0.05	4.2	0.252282
01.07.03 catabolism of vitamins, cofactors, and prosthetic groups	1	0.21	NCU04768	6	0.05	4.2	0.252282
11.04.03.01.10 regulation of splicing	1	0.21	NCU01612	6	0.05	4.2	0.252282
20.01.11 amine / polyamine transport	1	0.21	NCU07334	6	0.05	4.2	0.252282
30.05.02.20 Wnt signalling pathway	1	0.21	NCU20488	6	0.05	4.2	0.252282
01.05.06.07 C-2 compound and organic acid catabolism	2	0.42	NCU01692 NCU02056	21	0.2	2.1	0.261526
01.05.25 regulation of C-compound and carbohydrate metabolism	6	1.26	NCU00635 NCU02464 NCU03148 NCU08807 NCU03515 NCU08297	93	0.92	1.36957	0.276666
01.05.06 C-2 compound and organic acid metabolism	2	0.42	NCU02056 NCU01692	22	0.21	2	0.279367
34.07 cell adhesion	2	0.42	NCU08340 NCU06561	22	0.21	2	0.279367
01.20.01.05 metabolism of sugar alcohols	1	0.21	NCU01904	7	0.06	3.5	0.287661
10.03.05.03 cell cycle dependent actin filament reorganization	1	0.21	NCU04173	7	0.06	3.5	0.287661
14.07.02.01 O-directed glycosylation, deglycosylation	1	0.21	NCU05680	7	0.06	3.5	0.287661
40.10.02.02 apoptotic program	1	0.21	NCU04304	7	0.06	3.5	0.287661
18.01 regulation by	6	1.26	NCU20488 NCU03061 NCU00635 NCU06561 NCU01422 NCU06679	95	0.94	1.34043	0.293142
14.07.01 modification with fatty acids (e.g. myristylation, palmitylation, farnesylation)	2	0.42	NCU00465 NCU07414	23	0.22	1.90909	0.297174
32.07.03 detoxification by modification	2	0.42	NCU03297 NCU02056	23	0.22	1.90909	0.297174
42.29 bud / growth tip	2	0.42	NCU04173 NCU01438	23	0.22	1.90909	0.297174
20.09.07 vesicular transport (Golgi network, etc.)	10	2.1	NCU11236 NCU06694 NCU08340 NCU06702 NCU07414 NCU08693 NCU04173 NCU11237 NCU09602 NCU00465	174	1.72	1.22093	0.308682
01.02.07 regulation of nitrogen, sulfur and selenium metabolism	2	0.42	NCU20944 NCU05994	24	0.23	1.82609	0.314913
02.16.01 alcohol fermentation	2	0.42	NCU02056 NCU07042	24	0.23	1.82609	0.314913
42.04.03 actin cytoskeleton	4	0.84	NCU04173 NCU08340 NCU06561 NCU00202	60	0.59	1.42373	0.315286
11.04.03.03 5'-end processing	1	0.21	NCU09076	8	0.07	3	0.321369
18.02.01.02.05 kinase inhibitior	1	0.21	NCU06679	8	0.07	3	0.321369
20.01.01.01.01.01 siderophore-iron transport	1	0.21	NCU00227	8	0.07	3	0.321369
42.05 centrosome	1	0.21	NCU04054	8	0.07	3	0.321369
20.09.18 cellular import	11	2.31	NCU08407 NCU03257 NCU03425 NCU05168 NCU00790 NCU04421 NCU08340 NCU04173 NCU08325 NCU01065 NCU07334	200	1.98	1.16667	0.347022
34.11.12 perception of nutrients and nutritional adaptation	2	0.42	NCU05269 NCU06679	26	0.25	1.68	0.350053
32.07 detoxification	9	1.89	NCU03297 NCU06031 NCU02056 NCU05278 NCU09111 NCU02624 NCU01083 NCU00355 NCU03857	161	1.59	1.18868	0.351815
01.01.03.03.01 biosynthesis of proline	1	0.21	NCU20025	9	0.08	2.625	0.353486
01.01.05.01.02 degradation of polyamines	1	0.21	NCU02056	9	0.08	2.625	0.353486
02.01.03 regulation of glycolysis and gluconeogenesis	1	0.21	NCU06075	9	0.08	2.625	0.353486
02.16.03 lactate fermentation	1	0.21	NCU06441	9	0.08	2.625	0.353486
18.02.03 guanyl-nucleotide exchange factor (GEF)	1	0.21	NCU08277	9	0.08	2.625	0.353486
40.10.02.03 induction of apoptosis	1	0.21	NCU09436	9	0.08	2.625	0.353486
20.03.01 channel / pore class transport	2	0.42	NCU04304 NCU02250	27	0.26	1.61538	0.367397
01.01.09.01.02 degradation of glycine	1	0.21	NCU02274	10	0.09	2.33333	0.384086
11.02.03.01.07 transcription termination	1	0.21	NCU00405	10	0.09	2.33333	0.384086
32.07.07.03 glutathione conjugation reaction	1	0.21	NCU03857	10	0.09	2.33333	0.384086
10.03.01.01.03 G1/S transition of mitotic cell cycle	2	0.42	NCU04790 NCU04754	29	0.28	1.5	0.401515
20.09.16 cellular export and secretion	7	1.47	NCU08340 NCU02464 NCU04421 NCU04173 NCU03515 NCU08920 NCU08297	128	1.27	1.15748	0.402366
20.09.18.07 non-vesicular cellular import	5	1.05	NCU05168 NCU08407 NCU07334 NCU01065 NCU03257	89	0.88	1.19318	0.412949
10.03.04.07 nuclear division	1	0.21	NCU20488	11	0.1	2.1	0.41324
42.02 eukaryotic plasma membrane	1	0.21	NCU06702	11	0.1	2.1	0.41324
01.02.02 nitrogen metabolism	2	0.42	NCU03347 NCU04754	30	0.29	1.44828	0.418248
16.21.05 FAD/FMN binding	3	0.63	NCU04768 NCU04452 NCU02534	50	0.49	1.28571	0.423476
01.01.03.03 metabolism of proline	1	0.21	NCU20025	12	0.11	1.90909	0.441017
01.20.31 metabolism of secondary products derived from L-lysine, L-arginine and L-histidine	1	0.21	NCU01271	12	0.11	1.90909	0.441017
34.11.11 rhythm (e.g. circadian, ultradian)	1	0.21	NCU20488	12	0.11	1.90909	0.441017
30.01 cellular signalling	13	2.73	NCU20488 NCU09468 NCU04054 NCU08923 NCU09132 NCU10053 NCU06075 NCU06679 NCU20075 NCU08340 NCU06561 NCU01940 NCU05289	257	2.55	1.07059	0.442088
01.06.02 membrane lipid metabolism	3	0.63	NCU02305 NCU00261 NCU01904	53	0.52	1.21154	0.461243
32.05.01 resistance proteins	4	0.84	NCU04054 NCU09132 NCU09468 NCU00692	74	0.73	1.15068	0.466188
32.05.03 defense related proteins	2	0.42	NCU02056 NCU03061	33	0.32	1.3125	0.466945
01.01.09.05.02 degradation of tyrosine	1	0.21	NCU03283	13	0.12	1.75	0.467482
40.01.05 growth regulators / regulation of cell size	1	0.21	NCU06970	13	0.12	1.75	0.467482
30 CELLULAR COMMUNICATION/SIGNAL TRANSDUCTION MECHANISM	14	2.94	NCU08340 NCU09132 NCU20488 NCU06561 NCU06679 NCU08923 NCU01940 NCU10053 NCU09468 NCU07459 NCU04054 NCU05289 NCU20075 NCU06075	286	2.84	1.03521	0.486546
30.01.05 enzyme mediated signal transduction	7	1.47	NCU06679 NCU06075 NCU05289 NCU06561 NCU08340 NCU20075 NCU20488	139	1.38	1.06522	0.487697
01.20.37.01 metabolism of thioredoxin, glutaredoxin, glutathion	1	0.21	NCU09111	14	0.13	1.61538	0.492696
30.01.09.11 polyphosphoinositol mediated signal transduction	1	0.21	NCU10053	14	0.13	1.61538	0.492696
20.09.18.09 vesicular cellular import	4	0.84	NCU03425 NCU04173 NCU04421 NCU08340	77	0.76	1.10526	0.49727
20.09.18.09.01 endocytosis	4	0.84	NCU04173 NCU08340 NCU04421 NCU03425	77	0.76	1.10526	0.49727
01.01.09.04.02 degradation of phenylalanine	1	0.21	NCU03283	15	0.14	1.5	0.516719
20.09.16.01 Type I protein secretion system (ABC-type transport systems)	1	0.21	NCU08920	15	0.14	1.5	0.516719
30.05.01 receptor enzyme mediated signalling	1	0.21	NCU07459	15	0.14	1.5	0.516719
14.07 protein modification	23	4.83	NCU05680 NCU05836 NCU06512 NCU01808 NCU04173 NCU07338 NCU07414 NCU01589 NCU07459 NCU08380 NCU08944 NCU07308 NCU00465 NCU08340 NCU02549 NCU09602 NCU06679 NCU01940 NCU20488 NCU08693 NCU08323 NCU03713 NCU04334	484	4.8	1.00625	0.521942
32.05 disease, virulence and defense	9	1.89	NCU02056 NCU01904 NCU09468 NCU03061 NCU09132 NCU07459 NCU04054 NCU00692 NCU02627	187	1.85	1.02162	0.527231
16.05 polysaccharide binding	1	0.21	NCU06661	16	0.15	1.4	0.539606
20.03.02.03 antiporter	1	0.21	NCU09477	16	0.15	1.4	0.539606
42.08 Golgi	1	0.21	NCU08340	16	0.15	1.4	0.539606
02.25 oxidation of fatty acids	2	0.42	NCU02571 NCU04768	38	0.37	1.13514	0.542439
01.05.03 polysaccharide metabolism	8	1.68	NCU05836 NCU08909 NCU04510 NCU03963 NCU05789 NCU08226 NCU08228 NCU07253	169	1.67	1.00599	0.550386
01.01.09.04.01 biosynthesis of phenylalanine	1	0.21	NCU03347	17	0.16	1.3125	0.561412
01.05.09.04 aminosaccharide anabolism	1	0.21	NCU08228	17	0.16	1.3125	0.561412
01.06.02.02 glycolipid metabolism	1	0.21	NCU01904	17	0.16	1.3125	0.561412
01.20.05 metabolism of acetic acid derivatives	1	0.21	NCU02056	17	0.16	1.3125	0.561412
20.03.01.01 ion channels	1	0.21	NCU04304	17	0.16	1.3125	0.561412
11.02.03.01 general transcription activities	4	0.84	NCU04508 NCU01638 NCU01422 NCU00405	84	0.83	1.01205	0.5665
01.20.37 metabolism of peptide derived compounds	1	0.21	NCU09111	18	0.17	1.23529	0.582187
30.01.05.01.06 serine/threonine kinase	1	0.21	NCU20488	18	0.17	1.23529	0.582187
01.06.02.01 phospholipid metabolism	2	0.42	NCU02305 NCU00261	41	0.4	1.05	0.584042
20.03.25 ABC transporters	2	0.42	NCU03061 NCU08920	41	0.4	1.05	0.584042
10.03.01.03 cell cycle checkpoints (checkpoints of morphogenesis, DNA-damage,-replication, mitotic phase and spindle)	2	0.42	NCU04288 NCU02437	42	0.41	1.02439	0.597275
01.04.04 regulation of phosphate metabolism	1	0.21	NCU08743	20	0.19	1.10526	0.620837
10.01.03.05 extension/ polymerization activity	1	0.21	NCU09239	20	0.19	1.10526	0.620837
32.01.11 nutrient starvation response	1	0.21	NCU04050	20	0.19	1.10526	0.620837
32.10 degradation / modification of foreign (exogenous) compounds	1	0.21	NCU04510	20	0.19	1.10526	0.620837
20.09.07.05 intra Golgi transport	1	0.21	NCU08340	21	0.2	1.05	0.638802
99 UNCLASSIFIED PROTEINS	95	19.9	NCU02064 NCU02623 NCU03500 NCU07375 NCU00729 NCU07191 NCU08048 NCU02244 NCU07064 NCU01145 NCU03873 NCU06597 NCU04910 NCU10687 NCU00248 NCU00270 NCU04603 NCU05226 NCU08090 NCU20988 NCU01752 NCU20807 NCU21463 NCU07503 NCU11337 NCU02236 NCU04656 NCU06912 NCU20401 NCU02784 NCU05878 NCU00102 NCU02191 NCU08229 NCU06301 NCU06425 NCU11321 NCU01871 NCU03263 NCU04049 NCU04268 NCU09533 NCU03735 NCU05881 NCU…	5853	58.1	0.342513	1
01.05.09 aminosaccharide metabolism	1	0.21	NCU08228	27	0.26	0.807692	1
01.05.11.07 aromate catabolism	1	0.21	NCU02056	33	0.32	0.65625	1
01.05.11.07.01 aerobic aromate catabolism	1	0.21	NCU02056	33	0.32	0.65625	1
02.19 metabolism of energy reserves (e.g. glycogen, trehalose)	1	0.21	NCU04142	40	0.39	0.538462	1
11.02.03.04.03 transcription repression	1	0.21	NCU09380	24	0.23	0.913043	1
11.06.02 tRNA modification	1	0.21	NCU05301	31	0.3	0.7	1
14.07.02.02 N-directed glycosylation, deglycosylation	1	0.21	NCU05680	26	0.25	0.84	1
14.07.03 modification by phosphorylation, dephosphorylation, autophosphorylation	3	0.63	NCU08380 NCU01940 NCU20488	155	1.53	0.411765	1
14.07.11 protein processing (proteolytic)	1	0.21	NCU02549	72	0.71	0.295775	1
14.13 protein/peptide degradation	1	0.21	NCU05889	223	2.21	0.0950226	1
18.01.01 regulation by modification	1	0.21	NCU20488	49	0.48	0.4375	1
20.01.13 lipid/fatty acid transport	2	0.42	NCU02269 NCU05168	50	0.49	0.857143	1
20.01.25 vitamine/cofactor transport	1	0.21	NCU08407	25	0.24	0.875	1
20.09.07.03 ER to Golgi transport	2	0.42	NCU08340 NCU11237	55	0.54	0.777778	1
20.09.13 vacuolar/lysosomal transport	4	0.84	NCU06694 NCU08340 NCU05390 NCU20352	114	1.13	0.743363	1
30.01.05.01 protein kinase	1	0.21	NCU20488	64	0.63	0.333333	1
32.01.09 DNA damage response	2	0.42	NCU02437 NCU09436	50	0.49	0.857143	1
32.05.05 virulence, disease factors	2	0.42	NCU02627 NCU01904	61	0.6	0.7	1
34.11.03 chemoperception and response	9	1.89	NCU01233 NCU02464 NCU04142 NCU03515 NCU06694 NCU05168 NCU00261 NCU04510 NCU08297	209	2.07	0.913043	1
34.11.03.07 pheromone response, mating-type determination, sex-specific proteins	5	1.05	NCU04142 NCU06694 NCU08297 NCU02464 NCU03515	158	1.56	0.673077	1
42.09 intracellular transport vesicles	1	0.21	NCU08340	29	0.28	0.75	1
42.25 vacuole or lysosome	1	0.21	NCU08340	35	0.34	0.617647	1

## Sheet: P4
FUNCTIONAL CATEGORY	abs SET	rel SET	genes SET	abs GENOME	rel GENOME	rel SET/rel GENOME	P-VALUE
01.05.03 polysaccharide metabolism	31	20.3	NCU09491 NCU00206 NCU00890 NCU03328 NCU05956 NCU00710 NCU05121 NCU09680 NCU07898 NCU04997 NCU04854 NCU07487 NCU05924 NCU09425 NCU08176 NCU02343 NCU09664 NCU09764 NCU07760 NCU05955 NCU02916 NCU02344 NCU08760 NCU00836 NCU01050 NCU04952 NCU07340 NCU02240 NCU00449 NCU05057 NCU07190	169	1.67	12.1557	2.03267e-25
01.05 C-compound and carbohydrate metabolism	52	34.2	NCU05924 NCU05598 NCU06971 NCU02855 NCU07898 NCU08398 NCU00449 NCU04997 NCU08176 NCU08044 NCU07340 NCU02240 NCU21088 NCU08760 NCU07760 NCU07326 NCU05057 NCU02343 NCU00206 NCU00710 NCU05956 NCU03068 NCU09664 NCU01050 NCU04952 NCU11278 NCU20841 NCU00836 NCU01633 NCU09283 NCU00762 NCU07190 NCU09491 NCU00575 NCU00890 NCU02916 NCU07487 NCU02344 NCU09267 NCU09425 NCU08746 NCU10021 NCU03749 NCU03328 NCU…	759	7.54	4.53581	1.04059e-21
01 METABOLISM	69	45.3	NCU02240 NCU05924 NCU08746 NCU07898 NCU03725 NCU00206 NCU04854 NCU09491 NCU02059 NCU09267 NCU21088 NCU08762 NCU09425 NCU01830 NCU02344 NCU09283 NCU04815 NCU02916 NCU03749 NCU08687 NCU09680 NCU00575 NCU07941 NCU02855 NCU05956 NCU08176 NCU10021 NCU00449 NCU06110 NCU07487 NCU00762 NCU01050 NCU00890 NCU05121 NCU08785 NCU05057 NCU11278 NCU02287 NCU08117 NCU03068 NCU06971 NCU03328 NCU07340 NCU03982 NCU…	1740	17.2	2.63372	4.9269e-16
01.05.02.07 sugar, glucoside, polyol and carboxylate catabolism	14	9.21	NCU07190 NCU02855 NCU00836 NCU02916 NCU03328 NCU02344 NCU02240 NCU07898 NCU04952 NCU08687 NCU01050 NCU08760 NCU21088 NCU09680	124	1.23	7.4878	4.58216e-09
01.05.02 sugar, glucoside, polyol and carboxylate metabolism	14	9.21	NCU03328 NCU02916 NCU02344 NCU04952 NCU01050 NCU00836 NCU07190 NCU08760 NCU02240 NCU08687 NCU21088 NCU02855 NCU09680 NCU07898	156	1.54	5.98052	8.85149e-08
01.25 extracellular metabolism	6	3.94	NCU07760 NCU05955 NCU02059 NCU09491 NCU00710 NCU08176	40	0.39	10.1026	2.6981e-05
16.05 polysaccharide binding	4	2.63	NCU04997 NCU05955 NCU09664 NCU05924	16	0.15	17.5333	7.89688e-05
20.01.03 C-compound and carbohydrate transport	8	5.26	NCU10021 NCU00575 NCU01633 NCU05350 NCU00801 NCU05853 NCU06138 NCU05897	107	1.06	4.96226	0.000207273
32.10.07 degradation / modification of foreign (exogenous) polysaccharides	3	1.97	NCU02855 NCU00762 NCU05955	13	0.12	16.4167	0.000863945
01.25.07 extracellular ester compound degradation	2	1.31	NCU00710 NCU09491	4	0.03	43.6667	0.00133239
01.01.09.04.02 degradation of phenylalanine	3	1.97	NCU01830 NCU20841 NCU21328	15	0.14	14.0714	0.00134432
01.25.01 extracellular polysaccharide degradation	3	1.97	NCU08176 NCU07760 NCU05955	19	0.18	10.9444	0.00273902
32.10 degradation / modification of foreign (exogenous) compounds	3	1.97	NCU05955 NCU00762 NCU02855	20	0.19	10.3684	0.00318698
20.09.18 cellular import	9	5.92	NCU00801 NCU05853 NCU06138 NCU00575 NCU00023 NCU08477 NCU02009 NCU10021 NCU01633	200	1.98	2.9899	0.00327939
01.01.09.04 metabolism of phenylalanine	3	1.97	NCU01830 NCU20841 NCU21328	29	0.28	7.03571	0.00925191
20.01 transported compounds (substrates)	18	11.8	NCU05350 NCU09223 NCU01633 NCU11278 NCU00801 NCU06138 NCU05853 NCU10021 NCU05897 NCU00023 NCU03953 NCU20071 NCU09002 NCU08477 NCU06032 NCU00575 NCU02009 NCU03982	662	6.57	1.79604	0.0108101
20.09.18.07 non-vesicular cellular import	5	3.28	NCU10021 NCU05853 NCU01633 NCU06138 NCU00801	89	0.88	3.72727	0.0110473
01.05.25 regulation of C-compound and carbohydrate metabolism	5	3.28	NCU01633 NCU06971 NCU08687 NCU10021 NCU00575	93	0.92	3.56522	0.0131881
20.01.03.01 sugar transport	2	1.31	NCU10021 NCU01633	16	0.15	8.73333	0.0236639
01.01.09.04.01 biosynthesis of phenylalanine	2	1.31	NCU21328 NCU20841	17	0.16	8.1875	0.0265571
14.01 protein folding and stabilization	4	2.63	NCU09223 NCU02455 NCU20249 NCU03982	81	0.8	3.2875	0.0339634
20.09.07.05 intra Golgi transport	2	1.31	NCU20071 NCU08477	21	0.2	6.55	0.039433
16.17.09 heavy metal binding (Cu, Fe, Zn)	6	3.94	NCU01830 NCU02009 NCU00023 NCU04815 NCU20030 NCU03749	167	1.65	2.38788	0.0408131
20.09.07.25 vesicle formation	2	1.31	NCU08477 NCU20071	24	0.23	5.69565	0.0503332
34.11.12 perception of nutrients and nutritional adaptation	2	1.31	NCU01633 NCU10021	26	0.25	5.24	0.058129
01.01.06.02.01 biosynthesis of asparagine	1	0.65	NCU07941	4	0.03	21.6667	0.0590556
32.05.05 virulence, disease factors	3	1.97	NCU03370 NCU09491 NCU00710	61	0.6	3.28333	0.0644292
16.21.07 NAD/NADP binding	4	2.63	NCU08762 NCU04791 NCU08044 NCU03953	103	1.02	2.57843	0.0703328
01.25.03 extracellular protein degradation	1	0.65	NCU02059	5	0.04	16.25	0.0732698
01.06 lipid, fatty acid and isoprenoid metabolism	10	6.57	NCU03068 NCU02287 NCU04699 NCU06032 NCU08044 NCU11278 NCU04475 NCU07055 NCU08762 NCU08785	400	3.97	1.65491	0.0809301
01.01.06.01.01 biosynthesis of aspartate	1	0.65	NCU07941	6	0.05	13	0.0872707
01.01.06.01.02 degradation of aspartate	1	0.65	NCU07941	6	0.05	13	0.0872707
01.01.06.02 metabolism of asparagine	1	0.65	NCU07941	6	0.05	13	0.0872707
20.03 transport facilities	8	5.26	NCU10021 NCU03982 NCU03953 NCU05863 NCU06333 NCU05853 NCU05350 NCU01633	303	3.01	1.74751	0.0881577
01.01.09 metabolism of the cysteine - aromatic group	4	2.63	NCU21328 NCU20841 NCU01830 NCU08044	113	1.12	2.34821	0.0915465
16.21 complex cofactor/cosubstrate/vitamine binding	6	3.94	NCU04791 NCU08044 NCU07941 NCU03953 NCU08762 NCU11278	206	2.04	1.93137	0.0918024
20 CELLULAR TRANSPORT, TRANSPORT FACILITIES AND TRANSPORT ROUTES	20	13.1	NCU01633 NCU05897 NCU05853 NCU06032 NCU00023 NCU11278 NCU02009 NCU10021 NCU06138 NCU20071 NCU06333 NCU05350 NCU03953 NCU00575 NCU03982 NCU08477 NCU09002 NCU09223 NCU00801 NCU05863	970	9.63	1.36033	0.0932855
02.11 electron transport and membrane-associated energy conservation	4	2.63	NCU09002 NCU01467 NCU11278 NCU03953	116	1.15	2.28696	0.0984456
34.01.01.01 homeostasis of metal ions (Na, K, Ca etc.)	4	2.63	NCU02009 NCU00023 NCU20249 NCU03982	117	1.16	2.26724	0.100798
14.13.04.02 vacuolar protein degradation	1	0.65	NCU20030	7	0.06	10.8333	0.101061
20.03.02.02.01 proton driven symporter	1	0.65	NCU10021	7	0.06	10.8333	0.101061
16.17 metal binding	7	4.6	NCU20030 NCU00023 NCU02009 NCU03749 NCU04815 NCU20071 NCU01830	262	2.6	1.76923	0.101817
01.01 amino acid metabolism	8	5.26	NCU01830 NCU08117 NCU04815 NCU03749 NCU07941 NCU08044 NCU20841 NCU21328	319	3.16	1.66456	0.10994
02.25 oxidation of fatty acids	2	1.31	NCU06032 NCU02287	38	0.37	3.54054	0.112023
32 CELL RESCUE, DEFENSE AND VIRULENCE	13	8.55	NCU00762 NCU03370 NCU03982 NCU20249 NCU08624 NCU08477 NCU02855 NCU20875 NCU03068 NCU00710 NCU09491 NCU07055 NCU05955	594	5.9	1.44915	0.113679
20.09.05 non-vesicular ER transport	1	0.65	NCU03982	8	0.07	9.28571	0.114645
02.13.03 aerobic respiration	3	1.97	NCU03953 NCU01467 NCU09002	81	0.8	2.4625	0.123548
01.06.02.01 phospholipid metabolism	2	1.31	NCU04475 NCU04699	41	0.4	3.275	0.126984
02.01.03 regulation of glycolysis and gluconeogenesis	1	0.65	NCU00575	9	0.08	8.125	0.128025
02.16.03 lactate fermentation	1	0.65	NCU11278	9	0.08	8.125	0.128025
20.01.26 neurotransmitter transport	1	0.65	NCU08477	9	0.08	8.125	0.128025
20.09.16 cellular export and secretion	4	2.63	NCU01633 NCU08477 NCU20071 NCU05863	128	1.27	2.07087	0.128333
01.01.06.01 metabolism of aspartate	1	0.65	NCU07941	10	0.09	7.22222	0.141204
32.07.07.03 glutathione conjugation reaction	1	0.65	NCU20875	10	0.09	7.22222	0.141204
30.01.05.05.01 small GTPase mediated signal transduction	2	1.31	NCU20071 NCU08477	44	0.43	3.04651	0.142384
20.01.01.01.01 heavy metal ion transport (Cu+, Fe3+, etc.)	2	1.31	NCU00023 NCU02009	45	0.44	2.97727	0.147603
41 DEVELOPMENT (Systemic)	2	1.31	NCU03982 NCU05598	45	0.44	2.97727	0.147603
41.01 fungal/microorganismic development	2	1.31	NCU05598 NCU03982	45	0.44	2.97727	0.147603
32.05 disease, virulence and defense	5	3.28	NCU00710 NCU08477 NCU08624 NCU09491 NCU03370	187	1.85	1.77297	0.152858
20.03.02.02 symporter	1	0.65	NCU10021	11	0.1	6.5	0.154185
02.13 respiration	4	2.63	NCU01467 NCU03953 NCU09002 NCU11278	138	1.37	1.91971	0.155783
20.09 transport routes	13	8.55	NCU08477 NCU03982 NCU00023 NCU10021 NCU00801 NCU01633 NCU02009 NCU06333 NCU05863 NCU20071 NCU06138 NCU00575 NCU05853	636	6.31	1.35499	0.16395
30.01.09.03 Ca2+ mediated signal transduction	1	0.65	NCU20249	12	0.11	5.90909	0.166971
16.21.05 FAD/FMN binding	2	1.31	NCU11278 NCU03953	50	0.49	2.67347	0.174232
20.01.13 lipid/fatty acid transport	2	1.31	NCU09223 NCU06032	50	0.49	2.67347	0.174232
01.01.09.05.02 degradation of tyrosine	1	0.65	NCU01830	13	0.12	5.41667	0.179565
14.13.04 lysosomal and vacuolar protein degradation	1	0.65	NCU20030	13	0.12	5.41667	0.179565
40.10.02.01 anti-apoptosis	1	0.65	NCU03982	13	0.12	5.41667	0.179565
01.06.02 membrane lipid metabolism	2	1.31	NCU04475 NCU04699	53	0.52	2.51923	0.190559
32.01.03 osmotic and salt stress response	2	1.31	NCU20249 NCU03068	53	0.52	2.51923	0.190559
01.20.37.01 metabolism of thioredoxin, glutaredoxin, glutathion	1	0.65	NCU03749	14	0.13	5	0.19197
42.27 extracellular / secretion proteins	1	0.65	NCU02059	14	0.13	5	0.19197
14.04 protein targeting, sorting and translocation	5	3.28	NCU03982 NCU06333 NCU20071 NCU08477 NCU20249	203	2.01	1.63184	0.19293
20.09.07.03 ER to Golgi transport	2	1.31	NCU08477 NCU20071	55	0.54	2.42593	0.201555
30.01.05.05 G-protein mediated signal transduction	2	1.31	NCU08477 NCU20071	55	0.54	2.42593	0.201555
01.20.17.09 metabolism of alkaloids	1	0.65	NCU04791	15	0.14	4.64286	0.204188
20.09.07.27 vesicle fusion	1	0.65	NCU08477	15	0.14	4.64286	0.204188
02 ENERGY	8	5.26	NCU11278 NCU03953 NCU02287 NCU00575 NCU06032 NCU08398 NCU01467 NCU09002	375	3.72	1.41398	0.20635
40.10.02 apoptosis (type I programmed cell death)	2	1.31	NCU03982 NCU02507	57	0.56	2.33929	0.212623
01.01.03.02.02 degradation of glutamate	1	0.65	NCU07941	16	0.15	4.33333	0.216223
42.08 Golgi	1	0.65	NCU20071	16	0.15	4.33333	0.216223
43.03 animal cell type differentiation	1	0.65	NCU03982	16	0.15	4.33333	0.216223
01.20.01 metabolism of primary metabolic sugar derivatives	1	0.65	NCU09283	17	0.16	4.0625	0.228077
14.10 assembly of protein complexes	4	2.63	NCU02915 NCU03982 NCU08477 NCU20071	165	1.63	1.6135	0.238849
34.01.01 homeostasis of cations	4	2.63	NCU02009 NCU20249 NCU00023 NCU03982	165	1.63	1.6135	0.238849
01.20.37 metabolism of peptide derived compounds	1	0.65	NCU03749	18	0.17	3.82353	0.239753
02.01 glycolysis and gluconeogenesis	2	1.31	NCU00575 NCU08398	63	0.62	2.1129	0.246121
40.10 cell death	2	1.31	NCU02507 NCU03982	63	0.62	2.1129	0.246121
20.01.15 electron transport	4	2.63	NCU09223 NCU03953 NCU11278 NCU09002	168	1.66	1.58434	0.248684
01.01.09.02 metabolism of serine	1	0.65	NCU08044	19	0.18	3.61111	0.251254
40.20 cell aging	1	0.65	NCU00326	19	0.18	3.61111	0.251254
16 PROTEIN WITH BINDING FUNCTION OR COFACTOR REQUIREMENT (structural or catalytic)	24	15.7	NCU08044 NCU04815 NCU09664 NCU20071 NCU04997 NCU03749 NCU20030 NCU01830 NCU03953 NCU03982 NCU20249 NCU09223 NCU02009 NCU08762 NCU08687 NCU06110 NCU00023 NCU05924 NCU08477 NCU04791 NCU02455 NCU05955 NCU11278 NCU07941	1375	13.6	1.15441	0.252246
20.01.10 protein transport	3	1.97	NCU20071 NCU08477 NCU03982	118	1.17	1.68376	0.263696
01.04 phosphate metabolism	6	3.94	NCU08477 NCU03725 NCU03068 NCU03982 NCU00575 NCU08687	287	2.85	1.38246	0.266436
34.11.09 temperature perception and response	1	0.65	NCU03982	21	0.2	3.25	0.273739
41.01.01 mating (fertilization)	1	0.65	NCU03982	21	0.2	3.25	0.273739
01.07 metabolism of vitamins, cofactors, and prosthetic groups	4	2.63	NCU01830 NCU03979 NCU04815 NCU06110	176	1.74	1.51149	0.275313
01.01.03.02.01 biosynthesis of glutamate	1	0.65	NCU07941	22	0.21	3.09524	0.284729
01.05.06 C-2 compound and organic acid metabolism	1	0.65	NCU11278	22	0.21	3.09524	0.284729
01.06.10 regulation of lipid, fatty acid and isoprenoid metabolism	1	0.65	NCU06032	22	0.21	3.09524	0.284729
01.06.05 fatty acid metabolism	2	1.31	NCU06032 NCU11278	71	0.7	1.87143	0.291021
32.07.03 detoxification by modification	1	0.65	NCU07055	23	0.22	2.95455	0.295553
34.01 homeostasis	4	2.63	NCU00023 NCU02009 NCU03982 NCU20249	186	1.84	1.42935	0.30922
16.21.08 Fe/S binding	1	0.65	NCU03953	26	0.25	2.6	0.32706
20.03.02 carrier (electrochemical potential-driven transport)	1	0.65	NCU10021	27	0.26	2.5	0.337248
20.09.16.09 vesicular cellular export	1	0.65	NCU08477	28	0.27	2.40741	0.347283
20.09.16.09.03 exocytosis	1	0.65	NCU08477	28	0.27	2.40741	0.347283
01.01.09.05 metabolism of tyrosine	1	0.65	NCU01830	29	0.28	2.32143	0.357166
01.20.35.01 metabolism of phenylpropanoids	1	0.65	NCU20841	29	0.28	2.32143	0.357166
16.21.17 pyridoxal phosphate binding	1	0.65	NCU07941	29	0.28	2.32143	0.357166
42.09 intracellular transport vesicles	1	0.65	NCU08477	29	0.28	2.32143	0.357166
16.19.05 GTP binding	2	1.31	NCU08477 NCU20071	84	0.83	1.57831	0.363058
32.07.07 oxygen and radical detoxification	1	0.65	NCU20875	31	0.3	2.16667	0.37649
01.20.35 metabolism of secondary products derived from L-phenylalanine and L-tyrosine	1	0.65	NCU20841	33	0.32	2.03125	0.395236
14.07.09 posttranslational modification of amino acids (e.g. hydroxylation, methylation)	1	0.65	NCU20249	34	0.33	1.9697	0.404399
42.25 vacuole or lysosome	1	0.65	NCU20071	35	0.34	1.91176	0.413423
01.01.03.02 metabolism of glutamate	1	0.65	NCU07941	36	0.35	1.85714	0.422311
11.02.03.04.01 transcription activation	1	0.65	NCU08042	36	0.35	1.85714	0.422311
01.20.17 metabolism of secondary products derived from primary amino acids	1	0.65	NCU04791	37	0.36	1.80556	0.431066
02.11.05 accessory proteins of electron transport and membrane-associated energy conservation	1	0.65	NCU03953	38	0.37	1.75676	0.439689
32.01.05 heat shock response	1	0.65	NCU03982	39	0.38	1.71053	0.448182
20.09.07 vesicular transport (Golgi network, etc.)	3	1.97	NCU08477 NCU03982 NCU20071	174	1.72	1.14535	0.490975
30.01.09 second messenger mediated signal transduction	1	0.65	NCU20249	45	0.44	1.47727	0.496519
01.07.01 biosynthesis of vitamins, cofactors, and prosthetic groups	2	1.31	NCU03979 NCU06110	110	1.09	1.20183	0.497274
42.10 nucleus	2	1.31	NCU03982 NCU08477	110	1.09	1.20183	0.497274
01.20 secondary metabolism	4	2.63	NCU03749 NCU20841 NCU09283 NCU04791	245	2.43	1.0823	0.508646
20.09.13 vacuolar/lysosomal transport	2	1.31	NCU08477 NCU20071	114	1.13	1.15929	0.516321
16.17.07 magnesium binding	1	0.65	NCU20071	48	0.47	1.38298	0.519087
01.06.06.11 tetracyclic and pentacyclic triterpenes (cholesterin, steroids and hopanoids) metabolism	1	0.65	NCU08762	50	0.49	1.32653	0.53357
30.01 cellular signalling	4	2.63	NCU20249 NCU08177 NCU20071 NCU08477	257	2.55	1.03137	0.546517
18.01.07 regulation by binding / dissociation	1	0.65	NCU09223	52	0.51	1.27451	0.54762
32.01.07 unfolded protein response (e.g. ER quality control)	1	0.65	NCU03982	52	0.51	1.27451	0.54762
20.01.01.01 cation transport (H+, Na+, K+, Ca2+ , NH4+, etc.)	2	1.31	NCU02009 NCU00023	122	1.21	1.08264	0.552968
32.01.01 oxidative stress response	1	0.65	NCU03068	53	0.52	1.25	0.554487
02.16 fermentation	1	0.65	NCU11278	56	0.55	1.18182	0.574471
34 INTERACTION WITH THE ENVIRONMENT	7	4.6	NCU02009 NCU10021 NCU00023 NCU05598 NCU01633 NCU03982 NCU20249	473	4.69	0.98081	0.576561
01.05.02.04 sugar, glucoside, polyol and carboxylate anabolism	1	0.65	NCU08687	59	0.58	1.12069	0.593565
34.11 cellular sensing and response to external stimulus	4	2.63	NCU01633 NCU10021 NCU03982 NCU05598	277	2.75	0.956364	0.606135
20.03.22 transport ATPases	1	0.65	NCU05863	62	0.61	1.06557	0.611807
20.09.01 nuclear transport	1	0.65	NCU03982	62	0.61	1.06557	0.611807
30.05 transmembrane signal transduction	1	0.65	NCU20249	63	0.62	1.04839	0.617706
01.01.03 assimilation of ammonia, metabolism of the glutamate group	1	0.65	NCU07941	64	0.63	1.03175	0.623515
30 CELLULAR COMMUNICATION/SIGNAL TRANSDUCTION MECHANISM	4	2.63	NCU08177 NCU20249 NCU20071 NCU08477	286	2.84	0.926056	0.631378
32.07 detoxification	2	1.31	NCU20875 NCU07055	161	1.59	0.823899	0.703058
40 CELL FATE	3	1.97	NCU02507 NCU03982 NCU00326	241	2.39	0.824268	0.709739
14.07 protein modification	6	3.94	NCU03982 NCU20030 NCU20249 NCU09223 NCU08177 NCU20071	484	4.8	0.820833	0.745602
14 PROTEIN FATE (folding, modification, destination)	11	7.23	NCU08177 NCU09223 NCU02455 NCU20249 NCU06333 NCU02915 NCU20071 NCU20030 NCU02059 NCU03982 NCU08477	862	8.56	0.844626	0.763244
11.02.03.04 transcriptional control	4	2.63	NCU08477 NCU08687 NCU06971 NCU08042	350	3.47	0.757925	0.779916
43 CELL TYPE DIFFERENTIATION	3	1.97	NCU03982 NCU00575 NCU08477	280	2.78	0.708633	0.79972
16.19.03 ATP binding	3	1.97	NCU08477 NCU08687 NCU03982	292	2.9	0.67931	0.822277
18 REGULATION OF METABOLISM AND PROTEIN FUNCTION	2	1.31	NCU03982 NCU09223	216	2.14	0.61215	0.841852
14.13 protein/peptide degradation	2	1.31	NCU02059 NCU20030	223	2.21	0.59276	0.854539
16.19 nucleotide/nucleoside/nucleobase binding	4	2.63	NCU08477 NCU20071 NCU03982 NCU08687	397	3.94	0.667513	0.855688
10.01 DNA processing	3	1.97	NCU06110 NCU03982 NCU08477	333	3.3	0.59697	0.88377
16.01 protein binding	7	4.6	NCU09223 NCU08477 NCU02455 NCU06110 NCU03982 NCU08687 NCU20249	678	6.73	0.683507	0.894262
42 BIOGENESIS OF CELLULAR COMPONENTS	5	3.28	NCU11278 NCU20071 NCU08477 NCU03982 NCU02059	523	5.19	0.631985	0.902243
32.01 stress response	3	1.97	NCU03982 NCU20249 NCU03068	351	3.48	0.566092	0.904236
14.07.03 modification by phosphorylation, dephosphorylation, autophosphorylation	1	0.65	NCU08177	155	1.53	0.424837	0.90715
42.01 cell wall	1	0.65	NCU03982	156	1.54	0.422078	0.908574
34.11.03.07 pheromone response, mating-type determination, sex-specific proteins	1	0.65	NCU05598	158	1.56	0.416667	0.911357
43.01 fungal/microorganismic cell type differentiation	2	1.31	NCU00575 NCU08477	270	2.68	0.488806	0.918351
43.01.03 fungal and other eukaryotic cell type differentiation	2	1.31	NCU00575 NCU08477	270	2.68	0.488806	0.918351
18.02.01 enzymatic activity regulation / enzyme regulator	1	0.65	NCU03982	167	1.65	0.393939	0.922876
11.02.03 mRNA synthesis	4	2.63	NCU08477 NCU08687 NCU06971 NCU08042	465	4.61	0.570499	0.925683
10.01.05 DNA recombination and DNA repair	1	0.65	NCU06110	181	1.79	0.363128	0.937907
10.03.01 mitotic cell cycle and cell cycle control	2	1.31	NCU03982 NCU08477	298	2.96	0.442568	0.942776
10.03 cell cycle	3	1.97	NCU20249 NCU03982 NCU08477	403	4	0.4925	0.946439
34.11.03 chemoperception and response	1	0.65	NCU05598	209	2.07	0.31401	0.959789
18.02 regulation of protein activity	1	0.65	NCU03982	211	2.09	0.311005	0.96102
11.02 RNA synthesis	4	2.63	NCU08687 NCU08477 NCU06971 NCU08042	533	5.29	0.497164	0.963677
12.01 ribosome biogenesis	1	0.65	NCU20249	221	2.19	0.296804	0.966634
01.03 nucleotide/nucleoside/nucleobase metabolism	1	0.65	NCU08477	228	2.26	0.287611	0.970078
10 CELL CYCLE AND DNA PROCESSING	4	2.63	NCU06110 NCU08477 NCU03982 NCU20249	622	6.17	0.426256	0.986662
11 TRANSCRIPTION	4	2.63	NCU08042 NCU06971 NCU08687 NCU08477	725	7.2	0.365278	0.996121
12 PROTEIN SYNTHESIS	1	0.65	NCU20249	362	3.59	0.181058	0.996339
99 UNCLASSIFIED PROTEINS	58	38.1	NCU06383 NCU09429 NCU01076 NCU09176 NCU03329 NCU05338 NCU00633 NCU00870 NCU07339 NCU01944 NCU08113 NCU21633 NCU02008 NCU00763 NCU05712 NCU05394 NCU04905 NCU10045 NCU04522 NCU09295 NCU04655 NCU04698 NCU05841 NCU09416 NCU08541 NCU09681 NCU07453 NCU03180 NCU07222 NCU06214 NCU07899 NCU09160 NCU04276 NCU06966 NCU08190 NCU05501 NCU09522 NCU21013 NCU01560 NCU07705 NCU05846 NCU05260 NCU10039 NCU05165 NCU…	5853	58.1	0.655766	1
01.01.06 metabolism of the aspartate family	1	0.65	NCU07941	75	0.74	0.878378	1
01.02 nitrogen, sulfur and selenium metabolism	2	1.31	NCU08117 NCU07941	150	1.49	0.879195	1
01.03.01 purin nucleotide/nucleoside/nucleobase metabolism	1	0.65	NCU08477	109	1.08	0.601852	1
01.06.06 isoprenoid metabolism	1	0.65	NCU08762	74	0.73	0.890411	1
10.01.03 DNA synthesis and replication	1	0.65	NCU03982	101	1	0.65	1
10.01.05.01 DNA repair	1	0.65	NCU06110	147	1.46	0.445205	1
10.01.09 DNA restriction or modification	1	0.65	NCU08477	113	1.12	0.580357	1
10.01.09.05 DNA conformation modification (e.g. chromatin)	1	0.65	NCU08477	110	1.09	0.59633	1
10.03.02 meiosis	1	0.65	NCU03982	75	0.74	0.878378	1
10.03.03 cytokinesis (cell division) /septum formation and hydrolysis	1	0.65	NCU08477	94	0.93	0.698925	1
14.07.11 protein processing (proteolytic)	1	0.65	NCU20030	72	0.71	0.915493	1
14.13.01 cytoplasmic and nuclear protein degradation	1	0.65	NCU20030	127	1.26	0.515873	1
18.01 regulation by	1	0.65	NCU09223	95	0.94	0.691489	1
20.01.01 ion transport	2	1.31	NCU02009 NCU00023	149	1.48	0.885135	1
20.09.04 mitochondrial transport	1	0.65	NCU03982	91	0.9	0.722222	1
20.09.18.09 vesicular cellular import	1	0.65	NCU08477	77	0.76	0.855263	1
20.09.18.09.01 endocytosis	1	0.65	NCU08477	77	0.76	0.855263	1
30.01.05 enzyme mediated signal transduction	2	1.31	NCU20071 NCU08477	139	1.38	0.949275	1
42.10.03 organization of chromosome structure	1	0.65	NCU08477	82	0.81	0.802469	1
42.16 mitochondrion	1	0.65	NCU11278	85	0.84	0.77381	1
43.01.03.05 budding, cell polarity and filament formation	1	0.65	NCU08477	145	1.44	0.451389	1
43.01.03.09 development of asco- basidio- or zygospore	1	0.65	NCU00575	93	0.92	0.706522	1

## Sheet: P5
FUNCTIONAL CATEGORY	abs SET	rel SET	genes SET	abs GENOME	rel GENOME	rel SET/rel GENOME	P-VALUE
01 METABOLISM	117	35	NCU02998 NCU11195 NCU07465 NCU00129 NCU07309 NCU03779 NCU08977 NCU02665 NCU04292 NCU03171 NCU10008 NCU04850 NCU09358 NCU09407 NCU03995 NCU08382 NCU09116 NCU21626 NCU02704 NCU08828 NCU09024 NCU20559 NCU08856 NCU21088 NCU04013 NCU09931 NCU05419 NCU03913 NCU06523 NCU01830 NCU00034 NCU01181 NCU01839 NCU03141 NCU08152 NCU09170 NCU08216 NCU01654 NCU05956 NCU06543 NCU10021 NCU05038 NCU06009 NCU09169 NCU…	1740	17.2	2.03488	1.52832e-15
01.06 lipid, fatty acid and isoprenoid metabolism	47	14	NCU09575 NCU04013 NCU01181 NCU08828 NCU20282 NCU05038 NCU06761 NCU09510 NCU02665 NCU09407 NCU00129 NCU04930 NCU20228 NCU20878 NCU02287 NCU09473 NCU03141 NCU04803 NCU02381 NCU00552 NCU04796 NCU09732 NCU09115 NCU06346 NCU08002 NCU10008 NCU08044 NCU20790 NCU08977 NCU06543 NCU02027 NCU06643 NCU21626 NCU00446 NCU08382 NCU04475 NCU02704 NCU05419 NCU00034 NCU06530 NCU08785 NCU11196 NCU01839 NCU01654 NCU…	400	3.97	3.52645	1.93913e-14
01.05 C-compound and carbohydrate metabolism	57	17	NCU11325 NCU05965 NCU00810 NCU08398 NCU11195 NCU04963 NCU08856 NCU20559 NCU08044 NCU10015 NCU09170 NCU02704 NCU09559 NCU21088 NCU07737 NCU09281 NCU03350 NCU06522 NCU09024 NCU09931 NCU04013 NCU00677 NCU02343 NCU04160 NCU05956 NCU08750 NCU10008 NCU01517 NCU06616 NCU02235 NCU06761 NCU04230 NCU04850 NCU02319 NCU08167 NCU09732 NCU00446 NCU05078 NCU03913 NCU09473 NCU02580 NCU09358 NCU03995 NCU03295 NCU…	759	7.54	2.25464	3.22525e-09
20.01.03 C-compound and carbohydrate transport	18	5.38	NCU06522 NCU10021 NCU02188 NCU00801 NCU08002 NCU00782 NCU00450 NCU09358 NCU00809 NCU08152 NCU01813 NCU05585 NCU05853 NCU04963 NCU07169 NCU01132 NCU20559 NCU09027	107	1.06	5.07547	1.19017e-08
02.25 oxidation of fatty acids	10	2.99	NCU01654 NCU09732 NCU06543 NCU04796 NCU06643 NCU20790 NCU01181 NCU02287 NCU11196 NCU08828	38	0.37	8.08108	2.9223e-07
20.01 transported compounds (substrates)	47	14	NCU01132 NCU01285 NCU09698 NCU05585 NCU03372 NCU20559 NCU09358 NCU06346 NCU04803 NCU01181 NCU06522 NCU00801 NCU07169 NCU03171 NCU20790 NCU01763 NCU06543 NCU02580 NCU01968 NCU08002 NCU08035 NCU05853 NCU06410 NCU10021 NCU08382 NCU04274 NCU02522 NCU07530 NCU07465 NCU08152 NCU02188 NCU01813 NCU06643 NCU09931 NCU00782 NCU04963 NCU06619 NCU00809 NCU04388 NCU03350 NCU06009 NCU01545 NCU04013 NCU20228 NCU…	662	6.57	2.1309	5.00043e-07
20.09.18.07 non-vesicular cellular import	13	3.89	NCU02188 NCU10021 NCU09358 NCU04963 NCU05853 NCU07530 NCU00809 NCU00801 NCU05585 NCU08152 NCU09698 NCU00782 NCU06522	89	0.88	4.42045	6.75804e-06
01.01 amino acid metabolism	27	8.08	NCU10008 NCU01830 NCU02319 NCU08216 NCU11195 NCU02704 NCU06009 NCU20360 NCU03913 NCU04230 NCU00677 NCU05419 NCU09024 NCU03295 NCU03761 NCU08044 NCU04796 NCU00461 NCU09116 NCU20790 NCU00446 NCU09732 NCU03350 NCU05499 NCU04130 NCU04292 NCU06543	319	3.16	2.55696	7.27348e-06
20.09.18 cellular import	20	5.98	NCU00801 NCU09358 NCU05853 NCU08152 NCU06410 NCU02188 NCU06522 NCU10046 NCU04963 NCU02139 NCU09698 NCU00809 NCU06009 NCU09027 NCU10021 NCU05585 NCU00782 NCU07530 NCU20228 NCU01132	200	1.98	3.0202	1.04004e-05
01.06.05 fatty acid metabolism	10	2.99	NCU01181 NCU06543 NCU04796 NCU08828 NCU08382 NCU09732 NCU08002 NCU02027 NCU09473 NCU20790	71	0.7	4.27143	0.000107906
20.01.03.01 sugar transport	5	1.49	NCU10021 NCU06522 NCU09358 NCU04963 NCU00450	16	0.15	9.93333	0.000126067
20 CELLULAR TRANSPORT, TRANSPORT FACILITIES AND TRANSPORT ROUTES	53	15.8	NCU02139 NCU06009 NCU20559 NCU07530 NCU10046 NCU01813 NCU08035 NCU06543 NCU20228 NCU05853 NCU04274 NCU20790 NCU03372 NCU08382 NCU03171 NCU04388 NCU06410 NCU03350 NCU08092 NCU08002 NCU06619 NCU00450 NCU10021 NCU08152 NCU09027 NCU06346 NCU02422 NCU07465 NCU01968 NCU02580 NCU01285 NCU00809 NCU09358 NCU02544 NCU01763 NCU02522 NCU07169 NCU04013 NCU09698 NCU00782 NCU01132 NCU01955 NCU06522 NCU06643 NCU…	970	9.63	1.64071	0.000174542
20.03 transport facilities	23	6.88	NCU01763 NCU10021 NCU04963 NCU08382 NCU03603 NCU02544 NCU06522 NCU08035 NCU09698 NCU02422 NCU00782 NCU01813 NCU03171 NCU09358 NCU07465 NCU01968 NCU05853 NCU20559 NCU07169 NCU01285 NCU09027 NCU06009 NCU01132	303	3.01	2.28571	0.000184792
02 ENERGY	26	7.78	NCU02580 NCU06543 NCU10008 NCU06643 NCU08828 NCU09559 NCU01181 NCU08035 NCU09473 NCU01654 NCU04796 NCU02287 NCU04013 NCU06009 NCU02319 NCU03913 NCU06523 NCU09115 NCU02979 NCU04230 NCU00461 NCU08398 NCU09732 NCU20790 NCU10046 NCU11196	375	3.72	2.0914	0.000302624
01.01.09.04 metabolism of phenylalanine	6	1.79	NCU09116 NCU00677 NCU06009 NCU01830 NCU05499 NCU03295	29	0.28	6.39286	0.000317434
20.03.02.02 symporter	4	1.19	NCU06522 NCU01285 NCU10021 NCU07465	11	0.1	11.9	0.000326537
01.01.11.04 metabolism of leucine	5	1.49	NCU04292 NCU03913 NCU05419 NCU06543 NCU20790	22	0.21	7.09524	0.000645025
01.01.11.04.02 degradation of leucine	4	1.19	NCU06543 NCU05419 NCU20790 NCU04292	13	0.12	9.91667	0.000671146
01.01.11.02.02 degradation of isoleucine	3	0.89	NCU04292 NCU06543 NCU20790	7	0.06	14.8333	0.00114728
01.01.09.04.02 degradation of phenylalanine	4	1.19	NCU03295 NCU01830 NCU00677 NCU05499	15	0.14	8.5	0.00121559
16.21.05 FAD/FMN binding	7	2.09	NCU06543 NCU09635 NCU09931 NCU20790 NCU01181 NCU02580 NCU04803	50	0.49	4.26531	0.00121617
20.01.13 lipid/fatty acid transport	7	2.09	NCU04388 NCU06346 NCU03372 NCU20228 NCU01763 NCU06643 NCU08382	50	0.49	4.26531	0.00121617
01.01.09 metabolism of the cysteine - aromatic group	11	3.29	NCU11195 NCU09024 NCU03295 NCU00677 NCU09116 NCU01830 NCU05499 NCU03761 NCU08044 NCU06009 NCU08216	113	1.12	2.9375	0.00129097
34.11.12 perception of nutrients and nutritional adaptation	5	1.49	NCU08152 NCU06619 NCU10021 NCU04963 NCU02273	26	0.25	5.96	0.00144491
20.03.02 carrier (electrochemical potential-driven transport)	5	1.49	NCU06522 NCU07465 NCU10021 NCU20559 NCU01285	27	0.26	5.73077	0.00172575
01.06.02.01 phospholipid metabolism	6	1.79	NCU04475 NCU02027 NCU09510 NCU02381 NCU20282 NCU03141	41	0.4	4.475	0.00215025
14.07.11 protein processing (proteolytic)	8	2.39	NCU02273 NCU01955 NCU06764 NCU01545 NCU11053 NCU02319 NCU02701 NCU00034	72	0.71	3.3662	0.00254438
01.01.11.03.02 degradation of valine	3	0.89	NCU04292 NCU20790 NCU06543	9	0.08	11.125	0.00262026
14.13 protein/peptide degradation	16	4.79	NCU02273 NCU01545 NCU08766 NCU02319 NCU05078 NCU02701 NCU11053 NCU01955 NCU06764 NCU10477 NCU20425 NCU03108 NCU21182 NCU03290 NCU10046 NCU20360	223	2.21	2.16742	0.00308052
01.01.11.03 metabolism of valine	4	1.19	NCU06543 NCU20790 NCU04292 NCU03913	19	0.18	6.61111	0.00310802
01.05.10 aliphatic hydrocarbon metabolism	2	0.59	NCU09931 NCU04803	3	0.02	29.5	0.00322095
01.05.10.07 aliphatic hydrocarbon catabolism	2	0.59	NCU04803 NCU09931	3	0.02	29.5	0.00322095
14.13.01 cytoplasmic and nuclear protein degradation	11	3.29	NCU06764 NCU02701 NCU02273 NCU03108 NCU10046 NCU20425 NCU20360 NCU05078 NCU10477 NCU02319 NCU11053	127	1.26	2.61111	0.00327759
01.01.11.02 metabolism of isoleucine	4	1.19	NCU06543 NCU03913 NCU04292 NCU20790	20	0.19	6.26316	0.00378476
01.01.11 metabolism of the pyruvate family (alanine, isoleucine, leucine, valine) and D-alanine	6	1.79	NCU10008 NCU20790 NCU05419 NCU03913 NCU06543 NCU04292	46	0.45	3.97778	0.00389946
01.02 nitrogen, sulfur and selenium metabolism	12	3.59	NCU07309 NCU10008 NCU20260 NCU00461 NCU09931 NCU03171 NCU04803 NCU06761 NCU20559 NCU04292 NCU09169 NCU10015	150	1.49	2.4094	0.0041785
01.06.02 membrane lipid metabolism	6	1.79	NCU03141 NCU04475 NCU20282 NCU09510 NCU02381 NCU02027	53	0.52	3.44231	0.00787743
14.13.04 lysosomal and vacuolar protein degradation	3	0.89	NCU01955 NCU01545 NCU02273	13	0.12	7.41667	0.00808312
01.05.02.07 sugar, glucoside, polyol and carboxylate catabolism	10	2.99	NCU05965 NCU06009 NCU00810 NCU08856 NCU09170 NCU01517 NCU04013 NCU06523 NCU10008 NCU21088	124	1.23	2.43089	0.00813608
16.21 complex cofactor/cosubstrate/vitamine binding	14	4.19	NCU04803 NCU03350 NCU01181 NCU06543 NCU20790 NCU08044 NCU04292 NCU04013 NCU20632 NCU02704 NCU09635 NCU09931 NCU02580 NCU08856	206	2.04	2.05392	0.00870226
01.01.11.04.01 biosynthesis of leucine	3	0.89	NCU06543 NCU20790 NCU04292	14	0.13	6.84615	0.010038
01.06.06 isoprenoid metabolism	7	2.09	NCU00552 NCU04013 NCU05038 NCU20228 NCU08828 NCU04796 NCU09732	74	0.73	2.86301	0.0111537
01.01.09.05 metabolism of tyrosine	4	1.19	NCU09116 NCU05499 NCU06009 NCU01830	29	0.28	4.25	0.0146838
01.03.01.01 purine nucleotide /nucleoside/nucleobase catabolism	2	0.59	NCU03350 NCU07853	6	0.05	11.8	0.015071
01.20 secondary metabolism	15	4.49	NCU06009 NCU09024 NCU09116 NCU09115 NCU03295 NCU04130 NCU20694 NCU03350 NCU08002 NCU09732 NCU07737 NCU09635 NCU09473 NCU00677 NCU08167	245	2.43	1.84774	0.0165146
20.01.23 allantoin and allantoate transport	3	0.89	NCU09698 NCU00782 NCU09027	18	0.17	5.23529	0.020406
01.01.06.04.02 degradation of threonine	2	0.59	NCU04230 NCU03761	7	0.06	9.83333	0.0206404
14.07.11.01 autoproteolytic processing	2	0.59	NCU01955 NCU01545	7	0.06	9.83333	0.0206404
14.13.04.02 vacuolar protein degradation	2	0.59	NCU01955 NCU02273	7	0.06	9.83333	0.0206404
20.03.02.02.01 proton driven symporter	2	0.59	NCU10021 NCU06522	7	0.06	9.83333	0.0206404
01.01.09.02 metabolism of serine	3	0.89	NCU03761 NCU11195 NCU08044	19	0.18	4.94444	0.0236494
16.09 lipid binding	3	0.89	NCU06346 NCU03372 NCU06524	20	0.19	4.68421	0.0271549
16.17 metal binding	15	4.49	NCU01654 NCU05499 NCU02139 NCU07309 NCU03108 NCU03350 NCU20360 NCU02701 NCU06009 NCU08035 NCU01285 NCU09043 NCU20632 NCU20425 NCU01830	262	2.6	1.72692	0.0281841
20.09 transport routes	30	8.98	NCU02139 NCU09698 NCU01132 NCU08035 NCU09358 NCU00782 NCU09027 NCU10021 NCU06522 NCU00801 NCU04388 NCU07465 NCU20228 NCU02188 NCU07530 NCU05585 NCU01545 NCU03372 NCU08382 NCU06410 NCU04274 NCU06009 NCU08002 NCU08152 NCU04963 NCU08092 NCU00809 NCU01955 NCU05853 NCU10046	636	6.31	1.42314	0.0320801
01.01.06.05.01.02 degradation of homocysteine	1	0.29	NCU08216	1	0	0	0.033181
14.13.04.01 lysosomal protein degradation	1	0.29	NCU02273	1	0	0	0.033181
16.17.05 sodium binding	1	0.29	NCU01285	1	0	0	0.033181
30.05.02.16 hedgehog-dependent signalling pathway	1	0.29	NCU20228	1	0	0	0.033181
30.05.02.24.04 gamma-aminobutyric acid signalling pathway	1	0.29	NCU01545	1	0	0	0.033181
32.01.13 electromagnetic waves stress response (e.g. UV, X-ray)	1	0.29	NCU04013	1	0	0	0.033181
34.01.07 cholesterol homeostasis	1	0.29	NCU20228	1	0	0	0.033181
38.05 viral proteins	1	0.29	NCU02273	1	0	0	0.033181
01.05.02 sugar, glucoside, polyol and carboxylate metabolism	10	2.99	NCU01517 NCU06009 NCU09170 NCU06523 NCU00810 NCU10008 NCU04013 NCU08856 NCU21088 NCU05965	156	1.54	1.94156	0.0348402
01.01.06 metabolism of the aspartate family	6	1.79	NCU03761 NCU04796 NCU10008 NCU04230 NCU08216 NCU09732	75	0.74	2.41892	0.0378808
14.07.01 modification with fatty acids (e.g. myristylation, palmitylation, farnesylation)	3	0.89	NCU00034 NCU09510 NCU06530	23	0.22	4.04545	0.0392302
20.09.03 peroxisomal transport	2	0.59	NCU08382 NCU08002	10	0.09	6.55556	0.0414214
02.10 tricarboxylic-acid pathway (citrate cycle, Krebs cycle, TCA cycle)	4	1.19	NCU10008 NCU02580 NCU03913 NCU00461	40	0.39	3.05128	0.0426047
01.02.07 regulation of nitrogen, sulfur and selenium metabolism	3	0.89	NCU20260 NCU10008 NCU09169	24	0.23	3.86957	0.0437662
42.02 eukaryotic plasma membrane	2	0.59	NCU08856 NCU04388	11	0.1	5.9	0.0495376
20.01.15 electron transport	10	2.99	NCU01181 NCU02580 NCU20790 NCU03603 NCU03350 NCU08035 NCU09931 NCU04013 NCU06543 NCU04803	168	1.66	1.8012	0.0530747
02.01 glycolysis and gluconeogenesis	5	1.49	NCU03913 NCU04230 NCU10046 NCU04013 NCU08398	63	0.62	2.40323	0.0574208
01.01.06.04 metabolism of threonine	2	0.59	NCU04230 NCU03761	12	0.11	5.36364	0.0581706
01.01.06.06.02 degradation of lysine	2	0.59	NCU09732 NCU04796	12	0.11	5.36364	0.0581706
01.01.11.06 metabolism of the D-alanine amino acid group	1	0.29	NCU20790	2	0.01	29	0.0652642
01.20.01.09 metabolism of aminoglycoside antibiotics	1	0.29	NCU06009	2	0.01	29	0.0652642
01.20.05.03 metabolism of alkanes, alkenes, alkanals, alkanols	1	0.29	NCU09115	2	0.01	29	0.0652642
30.01.09.08 hormone mediated signal transduction	1	0.29	NCU02273	2	0.01	29	0.0652642
01.01.09.05.02 degradation of tyrosine	2	0.59	NCU05499 NCU01830	13	0.12	4.91667	0.0672774
01.03.01 purin nucleotide/nucleoside/nucleobase metabolism	7	2.09	NCU07853 NCU02979 NCU08035 NCU00446 NCU07309 NCU06410 NCU03350	109	1.08	1.93519	0.0702269
14.07 protein modification	22	6.58	NCU06764 NCU02235 NCU01545 NCU00434 NCU06530 NCU10477 NCU20425 NCU10046 NCU21396 NCU11053 NCU00034 NCU02319 NCU03995 NCU05078 NCU02273 NCU06230 NCU01181 NCU01955 NCU06006 NCU09510 NCU02701 NCU00188	484	4.8	1.37083	0.0829626
01.06.06.11 tetracyclic and pentacyclic triterpenes (cholesterin, steroids and hopanoids) metabolism	4	1.19	NCU04796 NCU09732 NCU20228 NCU08828	50	0.49	2.42857	0.0833656
20.09.13 vacuolar/lysosomal transport	7	2.09	NCU10046 NCU08035 NCU06410 NCU20228 NCU01955 NCU07465 NCU01545	114	1.13	1.84956	0.084632
01.20.17.09 metabolism of alkaloids	2	0.59	NCU03350 NCU09116	15	0.14	4.21429	0.0867517
42.19 peroxisome	2	0.59	NCU04802 NCU20599	15	0.14	4.21429	0.0867517
01.03.01.01.03 xanthine catabolism	1	0.29	NCU03350	3	0.02	14.5	0.0962859
01.06.06.13 tetraterpenes (carotinoids) metabolism	1	0.29	NCU00552	3	0.02	14.5	0.0962859
01.25.11 extracellular aminosaccharide degradation	1	0.29	NCU06020	3	0.02	14.5	0.0962859
16.13.03 fatty acid binding (e.g. acyl-carrier protein)	1	0.29	NCU06346	3	0.02	14.5	0.0962859
16.17.09 heavy metal binding (Cu, Fe, Zn)	9	2.69	NCU03108 NCU20360 NCU20425 NCU01830 NCU03350 NCU07309 NCU02701 NCU05499 NCU20632	167	1.65	1.6303	0.103788
01.01.09.04.01 biosynthesis of phenylalanine	2	0.59	NCU00677 NCU03295	17	0.16	3.6875	0.10766
01.20.01 metabolism of primary metabolic sugar derivatives	2	0.59	NCU06009 NCU09473	17	0.16	3.6875	0.10766
32.07.01 detoxification involving cytochrome P450	2	0.59	NCU09185 NCU06526	17	0.16	3.6875	0.10766
01.01.13 regulation of amino acid metabolism	2	0.59	NCU09116 NCU04130	18	0.17	3.47059	0.118567
01.20.17 metabolism of secondary products derived from primary amino acids	3	0.89	NCU03350 NCU08002 NCU09116	37	0.36	2.47222	0.123318
01.01.09.02.02 degradation of serine	1	0.29	NCU03761	4	0.03	9.66667	0.126281
01.01.09.03.02 degradation of cysteine	1	0.29	NCU08216	4	0.03	9.66667	0.126281
01.02.07.01 regulation of nitrogen metabolism	1	0.29	NCU09169	4	0.03	9.66667	0.126281
01.20.25 metabolism of secondary products derived from L-valin, L-leucin and L-isoleucin	1	0.29	NCU09732	4	0.03	9.66667	0.126281
02.16.11 propionate fermentation	1	0.29	NCU04230	4	0.03	9.66667	0.126281
16.17.03 potassium binding	1	0.29	NCU06009	4	0.03	9.66667	0.126281
42.07 endoplasmic reticulum	1	0.29	NCU01279	4	0.03	9.66667	0.126281
01.07 metabolism of vitamins, cofactors, and prosthetic groups	9	2.69	NCU01830 NCU00446 NCU04013 NCU08035 NCU06110 NCU02998 NCU03350 NCU03280 NCU03108	176	1.74	1.54598	0.131209
32.01.11 nutrient starvation response	2	0.59	NCU06761 NCU02273	20	0.19	3.10526	0.141131
02.19 metabolism of energy reserves (e.g. glycogen, trehalose)	3	0.89	NCU06523 NCU02319 NCU09559	40	0.39	2.28205	0.146173
16.13 C-compound binding	2	0.59	NCU06346 NCU00450	21	0.2	2.95	0.152732
20.03.25 ABC transporters	3	0.89	NCU06009 NCU02544 NCU08382	41	0.4	2.225	0.154079
01.03.16.03 DNA degradation	1	0.29	NCU20559	5	0.04	7.25	0.155283
01.05.08 C-4 compound metabolism	1	0.29	NCU00446	5	0.04	7.25	0.155283
18.02.01.02.03 protease inhibitor	1	0.29	NCU06524	5	0.04	7.25	0.155283
34.01.03.03 homeostasis of phosphate	1	0.29	NCU07465	5	0.04	7.25	0.155283
34.11.13 gas and metabolite distribution	1	0.29	NCU02273	5	0.04	7.25	0.155283
34.11.13.07 circulation (e.g. blood pressure)	1	0.29	NCU02273	5	0.04	7.25	0.155283
42.22 endosome	1	0.29	NCU06410	5	0.04	7.25	0.155283
14.07.05 modification by ubiquitination, deubiquitination	4	1.19	NCU01545 NCU10477 NCU20425 NCU10046	67	0.66	1.80303	0.18203
01.01.06.01.01 biosynthesis of aspartate	1	0.29	NCU10008	6	0.05	5.8	0.183326
01.01.06.01.02 degradation of aspartate	1	0.29	NCU10008	6	0.05	5.8	0.183326
01.20.17.03 metabolism of amines	1	0.29	NCU03350	6	0.05	5.8	0.183326
02.08 pyruvate dehydrogenase complex	1	0.29	NCU03913	6	0.05	5.8	0.183326
14.13.01.01 proteasomal degradation (ubiquitin/proteasomal pathway)	5	1.49	NCU11053 NCU10477 NCU10046 NCU20425 NCU06764	91	0.9	1.65556	0.184396
30.01.09 second messenger mediated signal transduction	3	0.89	NCU06761 NCU08856 NCU02273	45	0.44	2.02273	0.186937
01.05.25 regulation of C-compound and carbohydrate metabolism	5	1.49	NCU04963 NCU20559 NCU02319 NCU10021 NCU08152	93	0.92	1.61957	0.19589
16.17.01 calcium binding	2	0.59	NCU09043 NCU02139	25	0.24	2.45833	0.200673
20.01.25 vitamine/cofactor transport	2	0.59	NCU00782 NCU09698	25	0.24	2.45833	0.200673
34.11 cellular sensing and response to external stimulus	12	3.59	NCU03316 NCU08856 NCU03171 NCU02273 NCU04963 NCU06619 NCU10046 NCU09559 NCU10021 NCU03125 NCU09358 NCU08152	277	2.75	1.30545	0.210174
01.20.01.05 metabolism of sugar alcohols	1	0.29	NCU09473	7	0.06	4.83333	0.21044
16.01.01 receptor binding	1	0.29	NCU01545	7	0.06	4.83333	0.21044
16.13.01 sugar binding	1	0.29	NCU00450	7	0.06	4.83333	0.21044
16.21.08 Fe/S binding	2	0.59	NCU20632 NCU03350	26	0.25	2.36	0.212931
34 INTERACTION WITH THE ENVIRONMENT	19	5.68	NCU02273 NCU09358 NCU08152 NCU10046 NCU09559 NCU03171 NCU07465 NCU10021 NCU07530 NCU02139 NCU08856 NCU03125 NCU04963 NCU03316 NCU06619 NCU06009 NCU20228 NCU20632 NCU08035	473	4.69	1.21109	0.225109
01.01.06.06 metabolism of lysine	2	0.59	NCU04796 NCU09732	27	0.26	2.26923	0.225257
30.05.02 non-enzymatic receptor mediated signalling	2	0.59	NCU01545 NCU20228	27	0.26	2.26923	0.225257
01.03 nucleotide/nucleoside/nucleobase metabolism	10	2.99	NCU03350 NCU07853 NCU21369 NCU08035 NCU07309 NCU06410 NCU20559 NCU02979 NCU00446 NCU06876	228	2.26	1.32301	0.226292
20.03.02.03.01 proton driven antiporter	1	0.29	NCU20559	8	0.07	4.14286	0.236657
34.11.03.11 pH response	1	0.29	NCU03316	8	0.07	4.14286	0.236657
43.01.03.07 development of conidia	1	0.29	NCU09559	8	0.07	4.14286	0.236657
01.20.35.01 metabolism of phenylpropanoids	2	0.59	NCU00677 NCU03295	29	0.28	2.10714	0.250046
20.09.18.09 vesicular cellular import	4	1.19	NCU10046 NCU20228 NCU06410 NCU02139	77	0.76	1.56579	0.252167
20.09.18.09.01 endocytosis	4	1.19	NCU20228 NCU10046 NCU02139 NCU06410	77	0.76	1.56579	0.252167
01.01.09.03.01 biosynthesis of cysteine	1	0.29	NCU08216	9	0.08	3.625	0.262005
02.01.03 regulation of glycolysis and gluconeogenesis	1	0.29	NCU10046	9	0.08	3.625	0.262005
20.01.26 neurotransmitter transport	1	0.29	NCU06410	9	0.08	3.625	0.262005
40.10.02.03 induction of apoptosis	1	0.29	NCU02273	9	0.08	3.625	0.262005
01.02.02 nitrogen metabolism	2	0.59	NCU04292 NCU06761	30	0.29	2.03448	0.262475
02.16 fermentation	3	0.89	NCU04230 NCU06523 NCU06009	56	0.55	1.61818	0.28418
01.01.06.01 metabolism of aspartate	1	0.29	NCU10008	10	0.09	3.22222	0.286515
01.01.09.02.01 biosynthesis of serine	1	0.29	NCU11195	10	0.09	3.22222	0.286515
20.01.01.07.07 phosphate transport	1	0.29	NCU07465	10	0.09	3.22222	0.286515
02.45 energy conversion and regeneration	3	0.89	NCU08035 NCU02979 NCU09115	57	0.56	1.58929	0.293299
40.10.02 apoptosis (type I programmed cell death)	3	0.89	NCU20632 NCU02273 NCU06761	57	0.56	1.58929	0.293299
01.05.11.07 aromate catabolism	2	0.59	NCU07506 NCU06153	33	0.32	1.84375	0.299727
01.05.11.07.01 aerobic aromate catabolism	2	0.59	NCU06153 NCU07506	33	0.32	1.84375	0.299727
01.20.35 metabolism of secondary products derived from L-phenylalanine and L-tyrosine	2	0.59	NCU00677 NCU03295	33	0.32	1.84375	0.299727
01.05.13.01 S-adenosyl-methionine - homocysteine cycle	1	0.29	NCU05078	11	0.1	2.9	0.310212
10.03.04.07 nuclear division	1	0.29	NCU10046	11	0.1	2.9	0.310212
20.01.09 peptide transport	1	0.29	NCU03171	11	0.1	2.9	0.310212
16 PROTEIN WITH BINDING FUNCTION OR COFACTOR REQUIREMENT (structural or catalytic)	49	14.6	NCU02463 NCU02580 NCU21304 NCU06346 NCU08044 NCU02701 NCU09043 NCU02544 NCU06524 NCU10046 NCU09931 NCU01830 NCU10477 NCU04013 NCU08382 NCU02273 NCU06410 NCU05499 NCU06764 NCU08035 NCU06110 NCU02704 NCU03995 NCU02724 NCU01654 NCU03350 NCU03372 NCU06009 NCU04622 NCU20790 NCU01285 NCU02139 NCU20425 NCU11053 NCU03108 NCU01545 NCU04803 NCU04848 NCU00450 NCU06543 NCU06876 NCU08856 NCU09635 NCU04292 NCU…	1375	13.6	1.07353	0.315515
01.05.03 polysaccharide metabolism	7	2.09	NCU06523 NCU05956 NCU06020 NCU01517 NCU09281 NCU04850 NCU02343	169	1.67	1.2515	0.329285
01.01.11.03.01 biosynthesis of valine	1	0.29	NCU04292	12	0.11	2.63636	0.333125
30.01.09.03 Ca2+ mediated signal transduction	1	0.29	NCU06761	12	0.11	2.63636	0.333125
34.11.11 rhythm (e.g. circadian, ultradian)	1	0.29	NCU09559	12	0.11	2.63636	0.333125
14 PROTEIN FATE (folding, modification, destination)	31	9.28	NCU06410 NCU06230 NCU21182 NCU02235 NCU06530 NCU10046 NCU02701 NCU06764 NCU01955 NCU05078 NCU06006 NCU00188 NCU00434 NCU02319 NCU03995 NCU03108 NCU02273 NCU01181 NCU09510 NCU10477 NCU07530 NCU08766 NCU01545 NCU09043 NCU03290 NCU11053 NCU08961 NCU20425 NCU00034 NCU21396 NCU20360	862	8.56	1.08411	0.344838
30.05 transmembrane signal transduction	3	0.89	NCU03316 NCU01545 NCU20228	63	0.62	1.43548	0.348216
40.10 cell death	3	0.89	NCU06761 NCU02273 NCU20632	63	0.62	1.43548	0.348216
01.01.09.01.01 biosynthesis of glycine	1	0.29	NCU09024	13	0.12	2.41667	0.355279
01.01.09.03 metabolism of cysteine	1	0.29	NCU08216	13	0.12	2.41667	0.355279
32.10.07 degradation / modification of foreign (exogenous) polysaccharides	1	0.29	NCU04850	13	0.12	2.41667	0.355279
38 TRANSPOSABLE ELEMENTS, VIRAL AND PLASMID PROTEINS	1	0.29	NCU02273	13	0.12	2.41667	0.355279
20.01.01 ion transport	6	1.79	NCU07530 NCU07465 NCU06009 NCU20559 NCU08035 NCU01285	149	1.48	1.20946	0.373903
01.01.11.02.01 biosynthesis of isoleucine	1	0.29	NCU04292	14	0.13	2.23077	0.376699
01.05.09.07 aminosaccharide catabolism	1	0.29	NCU06020	14	0.13	2.23077	0.376699
01.20.37.01 metabolism of thioredoxin, glutaredoxin, glutathion	1	0.29	NCU04130	14	0.13	2.23077	0.376699
30.01.09.11 polyphosphoinositol mediated signal transduction	1	0.29	NCU08856	14	0.13	2.23077	0.376699
42.27 extracellular / secretion proteins	1	0.29	NCU04850	14	0.13	2.23077	0.376699
20.01.01.01 cation transport (H+, Na+, K+, Ca2+ , NH4+, etc.)	5	1.49	NCU08035 NCU01285 NCU07530 NCU06009 NCU20559	122	1.21	1.2314	0.380713
32.01 stress response	13	3.89	NCU06761 NCU20425 NCU06910 NCU10046 NCU09559 NCU03779 NCU02273 NCU06764 NCU11053 NCU04013 NCU20852 NCU02580 NCU00434	351	3.48	1.11782	0.382173
01.05.11 aromate metabolism	2	0.59	NCU07506 NCU06153	40	0.39	1.51282	0.384939
01.25 extracellular metabolism	2	0.59	NCU06020 NCU04850	40	0.39	1.51282	0.384939
01.20.17.01 metabolism of nonprotein amino acids	1	0.29	NCU08002	15	0.14	2.07143	0.39741
42.01 cell wall	6	1.79	NCU04160 NCU08828 NCU05686 NCU06910 NCU06361 NCU02216	156	1.54	1.16234	0.415637
01.01.03.02.02 degradation of glutamate	1	0.29	NCU00461	16	0.15	1.93333	0.417434
20.03.02.03 antiporter	1	0.29	NCU20559	16	0.15	1.93333	0.417434
42.08 Golgi	1	0.29	NCU06410	16	0.15	1.93333	0.417434
43.03 animal cell type differentiation	1	0.29	NCU02273	16	0.15	1.93333	0.417434
34.01 homeostasis	7	2.09	NCU07465 NCU20228 NCU02139 NCU20632 NCU06009 NCU07530 NCU08035	186	1.84	1.13587	0.421909
01.03.16 polynucleotide degradation	2	0.59	NCU21369 NCU20559	44	0.43	1.37209	0.431636
01.01.09.01 metabolism of glycine	1	0.29	NCU09024	17	0.16	1.8125	0.436795
01.06.02.02 glycolipid metabolism	1	0.29	NCU09510	17	0.16	1.8125	0.436795
01.20.05 metabolism of acetic acid derivatives	1	0.29	NCU09115	17	0.16	1.8125	0.436795
20.03.01.01 ion channels	1	0.29	NCU06009	17	0.16	1.8125	0.436795
30.05.02.24 G-protein coupled receptor signalling pathway	1	0.29	NCU01545	17	0.16	1.8125	0.436795
32.07.09 detoxification by degradation	1	0.29	NCU04013	17	0.16	1.8125	0.436795
01.20.37 metabolism of peptide derived compounds	1	0.29	NCU04130	18	0.17	1.70588	0.455515
34.01.03 homeostasis of anions	1	0.29	NCU07465	18	0.17	1.70588	0.455515
01.25.01 extracellular polysaccharide degradation	1	0.29	NCU04850	19	0.18	1.61111	0.473613
30 CELLULAR COMMUNICATION/SIGNAL TRANSDUCTION MECHANISM	10	2.99	NCU00188 NCU20228 NCU02463 NCU02273 NCU06410 NCU03316 NCU03426 NCU01545 NCU06761 NCU08856	286	2.84	1.05282	0.478784
01.01.06.05.01 biosynthesis of methionine	1	0.29	NCU08216	20	0.19	1.52632	0.491113
32.10 degradation / modification of foreign (exogenous) compounds	1	0.29	NCU04850	20	0.19	1.52632	0.491113
01.05.06.07 C-2 compound and organic acid catabolism	1	0.29	NCU04230	21	0.2	1.45	0.508032
20.09.07.05 intra Golgi transport	1	0.29	NCU01545	21	0.2	1.45	0.508032
01.05.06 C-2 compound and organic acid metabolism	1	0.29	NCU04230	22	0.21	1.38095	0.52439
01.06.10 regulation of lipid, fatty acid and isoprenoid metabolism	1	0.29	NCU02027	22	0.21	1.38095	0.52439
14.07.07 modification by ubiquitin-related proteins	1	0.29	NCU20425	23	0.22	1.31818	0.540205
18.02.01.02 enzyme inhibitor	1	0.29	NCU06524	23	0.22	1.31818	0.540205
02.11 electron transport and membrane-associated energy conservation	4	1.19	NCU09473 NCU06543 NCU08035 NCU20790	116	1.15	1.03478	0.540364
11.02.03.04.03 transcription repression	1	0.29	NCU09169	24	0.23	1.26087	0.555497
02.45.15 energy generation (e.g. ATP synthase)	1	0.29	NCU08035	25	0.24	1.20833	0.570281
14.07.02.02 N-directed glycosylation, deglycosylation	1	0.29	NCU03995	26	0.25	1.16	0.584575
01.05.02.04 sugar, glucoside, polyol and carboxylate anabolism	2	0.59	NCU06523 NCU10008	59	0.58	1.01724	0.587649
01.05.09 aminosaccharide metabolism	1	0.29	NCU06020	27	0.26	1.11538	0.598395
20.03.01 channel / pore class transport	1	0.29	NCU06009	27	0.26	1.11538	0.598395
01.01.09.06 metabolism of tryptophan	1	0.29	NCU09116	28	0.27	1.07407	0.611757
20.09.16.09 vesicular cellular export	1	0.29	NCU06410	28	0.27	1.07407	0.611757
20.09.16.09.03 exocytosis	1	0.29	NCU06410	28	0.27	1.07407	0.611757
10.03.01.01.03 G1/S transition of mitotic cell cycle	1	0.29	NCU04292	29	0.28	1.03571	0.624675
16.21.17 pyridoxal phosphate binding	1	0.29	NCU04292	29	0.28	1.03571	0.624675
99 UNCLASSIFIED PROTEINS	146	43.7	NCU02761 NCU04145 NCU09231 NCU09429 NCU02899 NCU07869 NCU07158 NCU09263 NCU20593 NCU20634 NCU04070 NCU04467 NCU05990 NCU09619 NCU00766 NCU02261 NCU04808 NCU21528 NCU02398 NCU03091 NCU07467 NCU06373 NCU08360 NCU00025 NCU01451 NCU03636 NCU09182 NCU09316 NCU01409 NCU04295 NCU04951 NCU03192 NCU09207 NCU09526 NCU21644 NCU03542 NCU04133 NCU06844 NCU07701 NCU01202 NCU04272 NCU06317 NCU06615 NCU08371 NCU…	5853	58.1	0.752151	1
01.01.03 assimilation of ammonia, metabolism of the glutamate group	1	0.29	NCU00461	64	0.63	0.460317	1
01.01.03.02 metabolism of glutamate	1	0.29	NCU00461	36	0.35	0.828571	1
01.01.06.05 metabolism of methionine	1	0.29	NCU08216	31	0.3	0.966667	1
01.03.01.03 purine nucleotide/nucleoside/nucleobase anabolism	1	0.29	NCU08035	31	0.3	0.966667	1
01.04 phosphate metabolism	7	2.09	NCU03779 NCU07465 NCU02544 NCU06410 NCU01181 NCU00446 NCU08382	287	2.85	0.733333	1
01.05.13 transfer of activated C-1 groups	1	0.29	NCU05078	35	0.34	0.852941	1
01.07.01 biosynthesis of vitamins, cofactors, and prosthetic groups	3	0.89	NCU02998 NCU06110 NCU08035	110	1.09	0.816514	1
02.11.05 accessory proteins of electron transport and membrane-associated energy conservation	1	0.29	NCU09473	38	0.37	0.783784	1
02.13 respiration	3	0.89	NCU02580 NCU10008 NCU09473	138	1.37	0.649635	1
02.13.03 aerobic respiration	2	0.59	NCU09473 NCU10008	81	0.8	0.7375	1
10 CELL CYCLE AND DNA PROCESSING	11	3.29	NCU03426 NCU10477 NCU04292 NCU06110 NCU07530 NCU07358 NCU20559 NCU06277 NCU10046 NCU06876 NCU06410	622	6.17	0.533225	1
10.01 DNA processing	5	1.49	NCU06110 NCU06410 NCU10477 NCU07358 NCU20559	333	3.3	0.451515	1
10.01.05 DNA recombination and DNA repair	3	0.89	NCU10477 NCU06110 NCU07358	181	1.79	0.497207	1
10.01.05.01 DNA repair	3	0.89	NCU07358 NCU06110 NCU10477	147	1.46	0.609589	1
10.01.09 DNA restriction or modification	1	0.29	NCU06410	113	1.12	0.258929	1
10.01.09.05 DNA conformation modification (e.g. chromatin)	1	0.29	NCU06410	110	1.09	0.266055	1
10.03 cell cycle	7	2.09	NCU06876 NCU06277 NCU20559 NCU04292 NCU03426 NCU10046 NCU07530	403	4	0.5225	1
10.03.01 mitotic cell cycle and cell cycle control	6	1.79	NCU07530 NCU10046 NCU04292 NCU03426 NCU06876 NCU06277	298	2.96	0.60473	1
10.03.01.01 mitotic cell cycle	2	0.59	NCU04292 NCU10046	104	1.03	0.572816	1
10.03.02 meiosis	2	0.59	NCU10046 NCU20559	75	0.74	0.797297	1
10.03.04 nuclear and chromosomal cycle	1	0.29	NCU10046	74	0.73	0.39726	1
11 TRANSCRIPTION	11	3.29	NCU04622 NCU09169 NCU02724 NCU21304 NCU02360 NCU10477 NCU06095 NCU21267 NCU01459 NCU06410 NCU04848	725	7.2	0.456944	1
11.02 RNA synthesis	11	3.29	NCU04848 NCU10477 NCU01459 NCU21267 NCU02724 NCU04622 NCU06410 NCU06095 NCU21304 NCU02360 NCU09169	533	5.29	0.621928	1
11.02.03 mRNA synthesis	11	3.29	NCU04622 NCU06410 NCU04848 NCU01459 NCU21267 NCU02724 NCU06095 NCU09169 NCU21304 NCU10477 NCU02360	465	4.61	0.713666	1
11.02.03.04 transcriptional control	11	3.29	NCU04848 NCU06410 NCU01459 NCU02360 NCU21304 NCU04622 NCU06095 NCU09169 NCU10477 NCU21267 NCU02724	350	3.47	0.948127	1
11.02.03.04.01 transcription activation	1	0.29	NCU04622	36	0.35	0.828571	1
12 PROTEIN SYNTHESIS	2	0.59	NCU02566 NCU20425	362	3.59	0.164345	1
12.01 ribosome biogenesis	1	0.29	NCU20425	221	2.19	0.13242	1
12.01.01 ribosomal proteins	1	0.29	NCU20425	152	1.51	0.192053	1
12.04 translation	2	0.59	NCU02566 NCU20425	188	1.86	0.317204	1
12.10 aminoacyl-tRNA-synthetases	1	0.29	NCU02566	38	0.37	0.783784	1
14.04 protein targeting, sorting and translocation	5	1.49	NCU07530 NCU01545 NCU06410 NCU01955 NCU08961	203	2.01	0.741294	1
14.07.02 modification with sugar residues (e.g. glycosylation, deglycosylation)	1	0.29	NCU03995	56	0.55	0.527273	1
14.07.03 modification by phosphorylation, dephosphorylation, autophosphorylation	5	1.49	NCU06230 NCU00434 NCU01181 NCU06006 NCU00188	155	1.53	0.973856	1
14.07.09 posttranslational modification of amino acids (e.g. hydroxylation, methylation)	1	0.29	NCU05078	34	0.33	0.878788	1
14.10 assembly of protein complexes	5	1.49	NCU09043 NCU03995 NCU10046 NCU06410 NCU10477	165	1.63	0.91411	1
16.01 protein binding	14	4.19	NCU06764 NCU03995 NCU10477 NCU20425 NCU06009 NCU06110 NCU02704 NCU10046 NCU11053 NCU02463 NCU02273 NCU08382 NCU01545 NCU06410	678	6.73	0.622585	1
16.03 nucleic acid binding	5	1.49	NCU21304 NCU02566 NCU04622 NCU04848 NCU02724	346	3.43	0.434402	1
16.03.01 DNA binding	4	1.19	NCU04622 NCU04848 NCU02724 NCU21304	167	1.65	0.721212	1
16.17.07 magnesium binding	1	0.29	NCU01654	48	0.47	0.617021	1
16.19 nucleotide/nucleoside/nucleobase binding	9	2.69	NCU10477 NCU06876 NCU06009 NCU08382 NCU01285 NCU02566 NCU06410 NCU02544 NCU10046	397	3.94	0.682741	1
16.19.03 ATP binding	8	2.39	NCU10477 NCU02544 NCU02566 NCU10046 NCU08382 NCU06009 NCU06410 NCU01285	292	2.9	0.824138	1
16.19.05 GTP binding	1	0.29	NCU06410	84	0.83	0.349398	1
16.21.07 NAD/NADP binding	3	0.89	NCU04013 NCU08856 NCU08044	103	1.02	0.872549	1
18 REGULATION OF METABOLISM AND PROTEIN FUNCTION	5	1.49	NCU06524 NCU06009 NCU11053 NCU21396 NCU01181	216	2.14	0.696262	1
18.01 regulation by	2	0.59	NCU01181 NCU11053	95	0.94	0.62766	1
18.01.01 regulation by modification	1	0.29	NCU01181	49	0.48	0.604167	1
18.01.07 regulation by binding / dissociation	1	0.29	NCU11053	52	0.51	0.568627	1
18.02 regulation of protein activity	5	1.49	NCU01181 NCU21396 NCU06009 NCU06524 NCU11053	211	2.09	0.712919	1
18.02.01 enzymatic activity regulation / enzyme regulator	3	0.89	NCU21396 NCU11053 NCU06524	167	1.65	0.539394	1
18.02.01.01 enzyme activator	1	0.29	NCU21396	72	0.71	0.408451	1
20.01.01.01.01 heavy metal ion transport (Cu+, Fe3+, etc.)	1	0.29	NCU07530	45	0.44	0.659091	1
20.01.01.07 anion transport	1	0.29	NCU07465	31	0.3	0.966667	1
20.01.07 amino acid/amino acid derivatives transport	1	0.29	NCU06619	36	0.35	0.828571	1
20.01.10 protein transport	2	0.59	NCU01545 NCU06410	118	1.17	0.504274	1
20.01.21 RNA transport	1	0.29	NCU04274	32	0.31	0.935484	1
20.01.27 drug/toxin transport	2	0.59	NCU01968 NCU02522	67	0.66	0.893939	1
20.03.22 transport ATPases	1	0.29	NCU08035	62	0.61	0.47541	1
20.09.01 nuclear transport	1	0.29	NCU04274	62	0.61	0.47541	1
20.09.04 mitochondrial transport	2	0.59	NCU07530 NCU07465	91	0.9	0.655556	1
20.09.07 vesicular transport (Golgi network, etc.)	3	0.89	NCU06410 NCU08092 NCU01545	174	1.72	0.517442	1
20.09.07.03 ER to Golgi transport	1	0.29	NCU06410	55	0.54	0.537037	1
20.09.14 cytoskeleton-dependent transport	1	0.29	NCU01545	38	0.37	0.783784	1
20.09.16 cellular export and secretion	4	1.19	NCU04963 NCU06410 NCU04388 NCU02139	128	1.27	0.937008	1
30.01 cellular signalling	7	2.09	NCU06410 NCU06761 NCU00188 NCU02463 NCU03426 NCU02273 NCU08856	257	2.55	0.819608	1
30.01.05 enzyme mediated signal transduction	1	0.29	NCU06410	139	1.38	0.210145	1
30.01.05.05 G-protein mediated signal transduction	1	0.29	NCU06410	55	0.54	0.537037	1
30.01.05.05.01 small GTPase mediated signal transduction	1	0.29	NCU06410	44	0.43	0.674419	1
32 CELL RESCUE, DEFENSE AND VIRULENCE	19	5.68	NCU00434 NCU09559 NCU03370 NCU02273 NCU04850 NCU06910 NCU09185 NCU02580 NCU06526 NCU10046 NCU11053 NCU04013 NCU20425 NCU06761 NCU03779 NCU06410 NCU20852 NCU06764 NCU04130	594	5.9	0.962712	1
32.01.05 heat shock response	1	0.29	NCU00434	39	0.38	0.763158	1
32.01.07 unfolded protein response (e.g. ER quality control)	1	0.29	NCU10046	52	0.51	0.568627	1
32.05 disease, virulence and defense	5	1.49	NCU04130 NCU04850 NCU06410 NCU03370 NCU09185	187	1.85	0.805405	1
32.05.03 defense related proteins	1	0.29	NCU09185	33	0.32	0.90625	1
32.05.05 virulence, disease factors	2	0.59	NCU03370 NCU04850	61	0.6	0.983333	1
32.07 detoxification	3	0.89	NCU06526 NCU04013 NCU09185	161	1.59	0.559748	1
34.01.01 homeostasis of cations	4	1.19	NCU07530 NCU08035 NCU02139 NCU06009	165	1.63	0.730061	1
34.01.01.01 homeostasis of metal ions (Na, K, Ca etc.)	3	0.89	NCU02139 NCU07530 NCU06009	117	1.16	0.767241	1
34.01.01.03 homeostasis of protons	1	0.29	NCU08035	42	0.41	0.707317	1
34.11.03 chemoperception and response	6	1.79	NCU03125 NCU08856 NCU10046 NCU03171 NCU09358 NCU03316	209	2.07	0.864734	1
34.11.03.07 pheromone response, mating-type determination, sex-specific proteins	4	1.19	NCU09358 NCU03125 NCU10046 NCU03171	158	1.56	0.762821	1
34.11.03.13 osmosensing and response	1	0.29	NCU08856	35	0.34	0.852941	1
40 CELL FATE	6	1.79	NCU10046 NCU06761 NCU11053 NCU02216 NCU20632 NCU02273	241	2.39	0.748954	1
40.01 cell growth / morphogenesis	3	0.89	NCU10046 NCU02216 NCU11053	186	1.84	0.483696	1
40.01.03 directional cell growth (morphogenesis)	1	0.29	NCU02216	60	0.59	0.491525	1
41 DEVELOPMENT (Systemic)	1	0.29	NCU09358	45	0.44	0.659091	1
41.01 fungal/microorganismic development	1	0.29	NCU09358	45	0.44	0.659091	1
42 BIOGENESIS OF CELLULAR COMPONENTS	17	5.08	NCU04388 NCU01545 NCU04802 NCU06910 NCU05686 NCU10046 NCU04160 NCU10008 NCU08828 NCU06410 NCU01279 NCU02216 NCU20599 NCU04850 NCU11053 NCU08856 NCU06361	523	5.19	0.978805	1
42.04 cytoskeleton/structural proteins	4	1.19	NCU01545 NCU02216 NCU06910 NCU11053	136	1.35	0.881481	1
42.04.03 actin cytoskeleton	1	0.29	NCU06910	60	0.59	0.491525	1
42.04.05 microtubule cytoskeleton	1	0.29	NCU01545	44	0.43	0.674419	1
42.10 nucleus	2	0.59	NCU10046 NCU06410	110	1.09	0.541284	1
42.10.03 organization of chromosome structure	1	0.29	NCU06410	82	0.81	0.358025	1
42.16 mitochondrion	1	0.29	NCU10008	85	0.84	0.345238	1
42.25 vacuole or lysosome	1	0.29	NCU01545	35	0.34	0.852941	1
43 CELL TYPE DIFFERENTIATION	7	2.09	NCU03171 NCU03125 NCU02216 NCU02273 NCU09559 NCU11053 NCU10046	280	2.78	0.751799	1
43.01 fungal/microorganismic cell type differentiation	7	2.09	NCU09559 NCU03171 NCU10046 NCU03125 NCU02273 NCU11053 NCU02216	270	2.68	0.779851	1
43.01.03 fungal and other eukaryotic cell type differentiation	7	2.09	NCU03171 NCU03125 NCU11053 NCU02216 NCU02273 NCU09559 NCU10046	270	2.68	0.779851	1
43.01.03.05 budding, cell polarity and filament formation	2	0.59	NCU02216 NCU11053	145	1.44	0.409722	1
43.01.03.09 development of asco- basidio- or zygospore	3	0.89	NCU03171 NCU10046 NCU02273	93	0.92	0.967391	1

## Sheet: P6
FUNCTIONAL CATEGORY	abs SET	rel SET	genes SET	abs GENOME	rel GENOME	rel SET/rel GENOME	P-VALUE
16 PROTEIN WITH BINDING FUNCTION OR COFACTOR REQUIREMENT (structural or catalytic)	86	39.6	NCU01332 NCU01820 NCU20004 NCU01635 NCU04288 NCU06606 NCU07296 NCU02393 NCU03050 NCU04387 NCU03515 NCU03539 NCU04770 NCU06354 NCU08605 NCU02437 NCU04405 NCU00090 NCU01930 NCU02011 NCU00959 NCU00355 NCU02374 NCU08332 NCU01547 NCU07697 NCU10061 NCU00212 NCU08297 NCU03911 NCU03795 NCU21255 NCU08823 NCU04370 NCU01528 NCU05800 NCU09778 NCU00775 NCU01634 NCU09119 NCU04304 NCU07887 NCU09816 NCU00147 NCU…	1375	13.6	2.91176	6.91706e-22
16.01 protein binding	57	26.2	NCU02011 NCU02374 NCU01204 NCU20004 NCU02224 NCU03539 NCU00726 NCU00043 NCU04054 NCU05942 NCU01332 NCU01547 NCU00018 NCU00959 NCU06561 NCU09778 NCU04288 NCU02435 NCU04370 NCU09436 NCU03911 NCU08605 NCU09076 NCU02437 NCU05995 NCU04770 NCU20876 NCU03606 NCU03795 NCU04304 NCU08297 NCU02289 NCU00823 NCU21627 NCU06695 NCU07365 NCU02393 NCU03050 NCU01930 NCU02806 NCU08332 NCU06354 NCU04142 NCU05227 NCU…	678	6.73	3.89302	7.78596e-20
32.01 stress response	38	17.5	NCU09436 NCU00355 NCU03905 NCU21627 NCU00043 NCU05046 NCU09778 NCU00018 NCU20004 NCU20278 NCU02289 NCU02437 NCU03606 NCU01792 NCU03911 NCU07365 NCU07887 NCU02393 NCU05942 NCU02133 NCU02224 NCU06031 NCU04371 NCU05227 NCU05995 NCU08823 NCU00726 NCU08669 NCU08147 NCU01547 NCU04370 NCU00823 NCU04510 NCU06556 NCU02374 NCU08605 NCU10061 NCU04142	351	3.48	5.02874	7.85025e-17
40 CELL FATE	29	13.3	NCU03515 NCU01204 NCU20004 NCU03911 NCU00043 NCU05204 NCU06679 NCU07173 NCU01036 NCU02819 NCU06781 NCU00018 NCU10777 NCU02393 NCU02289 NCU02806 NCU05791 NCU00726 NCU07296 NCU02133 NCU20876 NCU09436 NCU09778 NCU03795 NCU08297 NCU04304 NCU03050 NCU06561 NCU08823	241	2.39	5.56485	3.27583e-14
32 CELL RESCUE, DEFENSE AND VIRULENCE	45	20.7	NCU05942 NCU03606 NCU02393 NCU00355 NCU03905 NCU06556 NCU08823 NCU06031 NCU04054 NCU04510 NCU02224 NCU05227 NCU04370 NCU05995 NCU00823 NCU07167 NCU01332 NCU01792 NCU09778 NCU01547 NCU04371 NCU02282 NCU08147 NCU20004 NCU10061 NCU04142 NCU08605 NCU03911 NCU07365 NCU02018 NCU05780 NCU21177 NCU02437 NCU20278 NCU00043 NCU02289 NCU07887 NCU08669 NCU02133 NCU00018 NCU02374 NCU05046 NCU21627 NCU09436 NCU…	594	5.9	3.50847	6.07349e-14
34 INTERACTION WITH THE ENVIRONMENT	38	17.5	NCU01332 NCU01958 NCU05046 NCU06679 NCU02133 NCU09119 NCU20876 NCU00043 NCU03606 NCU04371 NCU04387 NCU01606 NCU07173 NCU21236 NCU07296 NCU09778 NCU01036 NCU03593 NCU04142 NCU04510 NCU01528 NCU08297 NCU03613 NCU03911 NCU03050 NCU02393 NCU01204 NCU03515 NCU10763 NCU03795 NCU00090 NCU02289 NCU01680 NCU08823 NCU06561 NCU08147 NCU02806 NCU04054	473	4.69	3.73134	1.25238e-12
40.01 cell growth / morphogenesis	24	11	NCU01204 NCU02819 NCU09778 NCU05204 NCU06781 NCU01036 NCU03795 NCU10777 NCU03911 NCU00043 NCU02289 NCU02806 NCU06679 NCU07296 NCU00726 NCU03515 NCU06561 NCU02393 NCU07173 NCU05791 NCU03050 NCU20876 NCU08297 NCU08823	186	1.84	5.97826	1.34938e-12
14.13.01.01 proteasomal degradation (ubiquitin/proteasomal pathway)	16	7.37	NCU10061 NCU00018 NCU08605 NCU02374 NCU05227 NCU07365 NCU02289 NCU00823 NCU04370 NCU05204 NCU01547 NCU21627 NCU02224 NCU20278 NCU05942 NCU20004	91	0.9	8.18889	7.81568e-11
02 ENERGY	31	14.2	NCU04304 NCU00775 NCU04387 NCU02393 NCU09778 NCU00018 NCU09119 NCU02806 NCU04510 NCU20004 NCU03340 NCU07550 NCU00043 NCU01528 NCU04142 NCU08669 NCU01680 NCU07697 NCU06695 NCU00959 NCU00951 NCU09212 NCU03559 NCU05429 NCU09816 NCU02366 NCU11395 NCU01606 NCU02797 NCU06606 NCU08093	375	3.72	3.8172	9.27619e-11
10.03 cell cycle	32	14.7	NCU01634 NCU09778 NCU04054 NCU07296 NCU00043 NCU05204 NCU06679 NCU04142 NCU06556 NCU04405 NCU03606 NCU05942 NCU20004 NCU20876 NCU02435 NCU03515 NCU09212 NCU04288 NCU02114 NCU00018 NCU04371 NCU00212 NCU02393 NCU03882 NCU02289 NCU02437 NCU08823 NCU02806 NCU03795 NCU08297 NCU02828 NCU10061	403	4	3.675	1.26905e-10
43 CELL TYPE DIFFERENTIATION	26	11.9	NCU07296 NCU01418 NCU03593 NCU20876 NCU03613 NCU04142 NCU10061 NCU06679 NCU05995 NCU03515 NCU02393 NCU02289 NCU08823 NCU05942 NCU06561 NCU00043 NCU08909 NCU08332 NCU09778 NCU08297 NCU10763 NCU01204 NCU02806 NCU03795 NCU20278 NCU03911	280	2.78	4.28058	2.84058e-10
43.01 fungal/microorganismic cell type differentiation	25	11.5	NCU05942 NCU20876 NCU01418 NCU08909 NCU02806 NCU07296 NCU03795 NCU05995 NCU08332 NCU04142 NCU02393 NCU08297 NCU20278 NCU10061 NCU08823 NCU09778 NCU01204 NCU03593 NCU10763 NCU03613 NCU00043 NCU06561 NCU03911 NCU03515 NCU02289	270	2.68	4.29104	6.82266e-10
43.01.03 fungal and other eukaryotic cell type differentiation	25	11.5	NCU03911 NCU10763 NCU04142 NCU03593 NCU08909 NCU10061 NCU09778 NCU01204 NCU05942 NCU01418 NCU00043 NCU07296 NCU08297 NCU03613 NCU02393 NCU03795 NCU03515 NCU08823 NCU06561 NCU20278 NCU05995 NCU08332 NCU02806 NCU20876 NCU02289	270	2.68	4.29104	6.82266e-10
10 CELL CYCLE AND DNA PROCESSING	39	17.9	NCU00043 NCU00212 NCU03795 NCU06679 NCU02114 NCU06556 NCU08823 NCU03515 NCU10061 NCU03606 NCU05204 NCU09212 NCU00018 NCU03539 NCU04405 NCU02437 NCU07296 NCU09778 NCU02828 NCU02393 NCU04370 NCU02435 NCU07887 NCU03882 NCU01635 NCU04142 NCU09436 NCU04371 NCU01634 NCU08297 NCU02806 NCU09076 NCU04770 NCU20004 NCU02289 NCU04288 NCU04054 NCU05942 NCU20876	622	6.17	2.90113	1.12275e-09
18.01 regulation by	15	6.91	NCU01547 NCU08823 NCU00043 NCU02393 NCU01332 NCU04370 NCU06561 NCU20876 NCU09778 NCU07296 NCU00823 NCU02374 NCU06679 NCU02224 NCU02806	95	0.94	7.35106	1.49707e-09
14.13.01 cytoplasmic and nuclear protein degradation	17	7.83	NCU02289 NCU20004 NCU21627 NCU10061 NCU05942 NCU07365 NCU04370 NCU05995 NCU05204 NCU20278 NCU02374 NCU08605 NCU00823 NCU05227 NCU00018 NCU02224 NCU01547	127	1.26	6.21429	1.64706e-09
42 BIOGENESIS OF CELLULAR COMPONENTS	35	16.1	NCU04770 NCU02289 NCU03911 NCU04288 NCU01204 NCU03795 NCU06781 NCU03515 NCU08909 NCU02393 NCU00212 NCU01634 NCU03050 NCU08823 NCU07550 NCU01332 NCU08820 NCU20876 NCU00957 NCU07173 NCU06556 NCU00043 NCU02435 NCU09436 NCU04054 NCU09778 NCU06561 NCU08297 NCU02437 NCU04304 NCU07167 NCU07277 NCU01635 NCU06679 NCU02282	523	5.19	3.10212	1.66894e-09
34.11.03 chemoperception and response	20	9.21	NCU00090 NCU01204 NCU03606 NCU21236 NCU10763 NCU03593 NCU03795 NCU03613 NCU04142 NCU03515 NCU02393 NCU01958 NCU08823 NCU20876 NCU04510 NCU09778 NCU02289 NCU03911 NCU07296 NCU08297	209	2.07	4.44928	2.20249e-08
34.11 cellular sensing and response to external stimulus	23	10.5	NCU21236 NCU04142 NCU03795 NCU20876 NCU03593 NCU04510 NCU03911 NCU10763 NCU01958 NCU00043 NCU04054 NCU01204 NCU07296 NCU08297 NCU03613 NCU08823 NCU02289 NCU09778 NCU03606 NCU00090 NCU03515 NCU06679 NCU02393	277	2.75	3.81818	2.7489e-08
14 PROTEIN FATE (folding, modification, destination)	44	20.2	NCU05942 NCU09778 NCU21627 NCU05427 NCU05995 NCU05204 NCU00823 NCU01547 NCU08297 NCU08973 NCU00726 NCU03515 NCU04142 NCU08605 NCU01792 NCU02289 NCU02806 NCU05227 NCU03795 NCU04288 NCU07365 NCU10061 NCU00043 NCU02374 NCU02393 NCU07296 NCU02011 NCU06679 NCU04370 NCU02224 NCU02797 NCU04770 NCU04054 NCU03050 NCU07173 NCU20004 NCU00018 NCU09212 NCU04371 NCU08823 NCU20278 NCU06556 NCU01332 NCU01820	862	8.56	2.35981	4.62846e-08
10.03.04 nuclear and chromosomal cycle	12	5.52	NCU04054 NCU04288 NCU20876 NCU02435 NCU01634 NCU00043 NCU02437 NCU04405 NCU00212 NCU02828 NCU06679 NCU09778	74	0.73	7.56164	5.032e-08
43.01.03.09 development of asco- basidio- or zygospore	13	5.99	NCU08823 NCU02289 NCU10763 NCU05995 NCU10061 NCU02393 NCU05942 NCU01418 NCU20278 NCU03515 NCU02806 NCU04142 NCU03795	93	0.92	6.51087	8.60337e-08
34.05 cell motility	10	4.6	NCU01528 NCU03050 NCU03795 NCU08297 NCU03911 NCU09778 NCU07173 NCU02393 NCU04054 NCU20876	51	0.5	9.2	1.04029e-07
18.02.01 enzymatic activity regulation / enzyme regulator	17	7.83	NCU01332 NCU02224 NCU04370 NCU05227 NCU06679 NCU09778 NCU02133 NCU20876 NCU02393 NCU07296 NCU00823 NCU02806 NCU06561 NCU00043 NCU02374 NCU01547 NCU07173	167	1.65	4.74545	1.067e-07
18.02 regulation of protein activity	19	8.75	NCU02374 NCU06679 NCU08823 NCU04370 NCU02224 NCU00043 NCU02133 NCU01332 NCU04770 NCU09778 NCU05227 NCU20876 NCU00823 NCU07296 NCU02806 NCU06561 NCU01547 NCU07173 NCU02393	211	2.09	4.1866	1.33324e-07
18 REGULATION OF METABOLISM AND PROTEIN FUNCTION	19	8.75	NCU02806 NCU02374 NCU04370 NCU09778 NCU06679 NCU02224 NCU07296 NCU01332 NCU02393 NCU01547 NCU00823 NCU05227 NCU07173 NCU02133 NCU20876 NCU04770 NCU08823 NCU00043 NCU06561	216	2.14	4.08879	1.92966e-07
34.11.03.07 pheromone response, mating-type determination, sex-specific proteins	16	7.37	NCU01204 NCU03795 NCU02393 NCU01958 NCU04142 NCU10763 NCU08297 NCU07296 NCU03606 NCU03911 NCU20876 NCU21236 NCU03613 NCU02289 NCU03515 NCU03593	158	1.56	4.72436	2.75347e-07
10.03.01 mitotic cell cycle and cell cycle control	22	10.1	NCU02114 NCU03606 NCU00018 NCU05204 NCU04288 NCU07296 NCU09778 NCU20876 NCU09212 NCU02806 NCU08297 NCU02393 NCU06556 NCU20004 NCU08823 NCU02289 NCU03515 NCU03795 NCU02437 NCU04054 NCU02828 NCU00043	298	2.96	3.41216	4.40804e-07
14.07 protein modification	29	13.3	NCU07365 NCU05942 NCU02224 NCU21627 NCU09778 NCU10061 NCU00018 NCU00043 NCU00823 NCU07173 NCU20004 NCU04371 NCU07296 NCU08605 NCU04770 NCU09212 NCU06679 NCU04370 NCU08973 NCU02797 NCU05204 NCU06556 NCU02289 NCU02806 NCU05995 NCU00726 NCU20278 NCU02393 NCU01547	484	4.8	2.77083	5.16812e-07
42.04 cytoskeleton/structural proteins	14	6.45	NCU03050 NCU03795 NCU03911 NCU08297 NCU06561 NCU00043 NCU07173 NCU03515 NCU02289 NCU01204 NCU02282 NCU04054 NCU08823 NCU20876	136	1.35	4.77778	1.28431e-06
18.01.07 regulation by binding / dissociation	9	4.14	NCU02374 NCU01547 NCU06561 NCU00823 NCU06679 NCU02224 NCU08823 NCU02806 NCU20876	52	0.51	8.11765	1.40166e-06
14.13 protein/peptide degradation	18	8.29	NCU10061 NCU02289 NCU02374 NCU08605 NCU20004 NCU05227 NCU00823 NCU00018 NCU05204 NCU01547 NCU05995 NCU21627 NCU20278 NCU05427 NCU07365 NCU02224 NCU04370 NCU05942	223	2.21	3.75113	1.45098e-06
16.03 nucleic acid binding	23	10.5	NCU01634 NCU02435 NCU05800 NCU09778 NCU06251 NCU01793 NCU01635 NCU09076 NCU02806 NCU02437 NCU00212 NCU00726 NCU20876 NCU02819 NCU03043 NCU03606 NCU10061 NCU00090 NCU04770 NCU08823 NCU01820 NCU01930 NCU21255	346	3.43	3.06122	1.49753e-06
11.02.03.04 transcriptional control	23	10.5	NCU03043 NCU05800 NCU02393 NCU00212 NCU08823 NCU21255 NCU02437 NCU04770 NCU01635 NCU10061 NCU02576 NCU02819 NCU02806 NCU01634 NCU02435 NCU06679 NCU09333 NCU03905 NCU02289 NCU09436 NCU06251 NCU09778 NCU00090	350	3.47	3.02594	1.82377e-06
43.01.03.05 budding, cell polarity and filament formation	14	6.45	NCU06561 NCU09778 NCU07296 NCU02393 NCU01204 NCU03515 NCU08823 NCU20876 NCU00043 NCU08297 NCU03911 NCU02806 NCU08909 NCU03795	145	1.44	4.47917	2.77496e-06
16.09 lipid binding	6	2.76	NCU00018 NCU09659 NCU03515 NCU03795 NCU08297 NCU20004	20	0.19	14.5263	2.82024e-06
16.03.01 DNA binding	15	6.91	NCU01635 NCU00090 NCU21255 NCU01634 NCU02437 NCU09076 NCU04770 NCU02435 NCU05800 NCU00212 NCU03606 NCU02806 NCU02819 NCU09778 NCU03043	167	1.65	4.18788	3.0204e-06
42.10 nucleus	12	5.52	NCU00212 NCU09436 NCU06679 NCU04054 NCU04770 NCU01635 NCU02435 NCU04288 NCU02437 NCU08823 NCU01634 NCU09778	110	1.09	5.06422	4.07768e-06
16.19 nucleotide/nucleoside/nucleobase binding	24	11	NCU20876 NCU09076 NCU00775 NCU07697 NCU09659 NCU01606 NCU04054 NCU00290 NCU02289 NCU08297 NCU03515 NCU09119 NCU00018 NCU09778 NCU02393 NCU07173 NCU03539 NCU04370 NCU00726 NCU07296 NCU08823 NCU04142 NCU20004 NCU03795	397	3.94	2.79188	4.62297e-06
20.01 transported compounds (substrates)	33	15.2	NCU20004 NCU01793 NCU01606 NCU08823 NCU05046 NCU03559 NCU10763 NCU08297 NCU00959 NCU02011 NCU03515 NCU00775 NCU08093 NCU04387 NCU00823 NCU01820 NCU07173 NCU20876 NCU09076 NCU06556 NCU06606 NCU01204 NCU04304 NCU09119 NCU06695 NCU09816 NCU00018 NCU01332 NCU07697 NCU01680 NCU08147 NCU04288 NCU03795	662	6.57	2.31355	4.86925e-06
20.03.22 transport ATPases	9	4.14	NCU09119 NCU05046 NCU04387 NCU20004 NCU01606 NCU01680 NCU00018 NCU01332 NCU08147	62	0.61	6.78689	6.41165e-06
40.10.02.02 apoptotic program	4	1.84	NCU00018 NCU02133 NCU20004 NCU04304	7	0.06	30.6667	6.98918e-06
40.10 cell death	9	4.14	NCU08823 NCU09436 NCU04304 NCU20004 NCU02133 NCU00726 NCU02806 NCU00018 NCU05204	63	0.62	6.67742	7.3419e-06
20 CELLULAR TRANSPORT, TRANSPORT FACILITIES AND TRANSPORT ROUTES	42	19.3	NCU03515 NCU04405 NCU00775 NCU09076 NCU07697 NCU00959 NCU09119 NCU08147 NCU02806 NCU01204 NCU03559 NCU04288 NCU02011 NCU06556 NCU20004 NCU04054 NCU08297 NCU01793 NCU01820 NCU06606 NCU01606 NCU00823 NCU04387 NCU05046 NCU00018 NCU06695 NCU07173 NCU08823 NCU08973 NCU09816 NCU01680 NCU08093 NCU20876 NCU08425 NCU02289 NCU03795 NCU04304 NCU10763 NCU03050 NCU01332 NCU03911 NCU00290	970	9.63	2.00415	7.77275e-06
42.10.03 organization of chromosome structure	10	4.6	NCU00212 NCU08823 NCU04770 NCU01635 NCU09436 NCU02435 NCU06679 NCU09778 NCU01634 NCU02437	82	0.81	5.67901	9.72363e-06
10.01 DNA processing	21	9.67	NCU09436 NCU02437 NCU06679 NCU08823 NCU07887 NCU01635 NCU20876 NCU00018 NCU04370 NCU09778 NCU00212 NCU04770 NCU02435 NCU01634 NCU03539 NCU03606 NCU09076 NCU06556 NCU02289 NCU20004 NCU00043	333	3.3	2.9303	9.9386e-06
11.02 RNA synthesis	28	12.9	NCU00090 NCU20876 NCU09436 NCU21255 NCU02289 NCU06251 NCU01635 NCU03043 NCU02437 NCU09778 NCU05800 NCU06354 NCU10061 NCU01793 NCU02576 NCU00212 NCU02806 NCU04770 NCU02435 NCU03905 NCU00043 NCU02819 NCU09333 NCU08823 NCU01634 NCU02393 NCU09076 NCU06679	533	5.29	2.43856	1.05434e-05
30.01 cellular signalling	18	8.29	NCU05800 NCU07296 NCU02133 NCU00018 NCU09778 NCU04054 NCU09212 NCU02289 NCU02806 NCU00043 NCU08823 NCU04371 NCU20876 NCU02393 NCU07173 NCU20004 NCU06679 NCU06561	257	2.55	3.25098	1.07414e-05
30 CELLULAR COMMUNICATION/SIGNAL TRANSDUCTION MECHANISM	19	8.75	NCU02133 NCU02289 NCU00043 NCU07296 NCU04371 NCU09212 NCU06561 NCU06679 NCU05800 NCU02806 NCU07173 NCU08823 NCU20004 NCU00018 NCU04054 NCU09778 NCU02393 NCU00726 NCU20876	286	2.84	3.08099	1.29219e-05
02.11.05 accessory proteins of electron transport and membrane-associated energy conservation	7	3.22	NCU20004 NCU03340 NCU00018 NCU06695 NCU00959 NCU06606 NCU09816	38	0.37	8.7027	1.40394e-05
20.01.15 electron transport	14	6.45	NCU01606 NCU04387 NCU00775 NCU07697 NCU01680 NCU00959 NCU09119 NCU08093 NCU06556 NCU06606 NCU03559 NCU01332 NCU06695 NCU09816	168	1.66	3.88554	1.54261e-05
11.02.03 mRNA synthesis	25	11.5	NCU01635 NCU03043 NCU01634 NCU06251 NCU02393 NCU05800 NCU02437 NCU00043 NCU02576 NCU00090 NCU09333 NCU06679 NCU02819 NCU04770 NCU21255 NCU00212 NCU03905 NCU02806 NCU09436 NCU06354 NCU10061 NCU08823 NCU02435 NCU09778 NCU02289	465	4.61	2.49458	2.21287e-05
10.03.04.03 chromosome condensation	5	2.3	NCU01634 NCU02828 NCU02435 NCU00212 NCU02437	17	0.16	14.375	2.2271e-05
14.07.11 protein processing (proteolytic)	9	4.14	NCU05942 NCU08605 NCU10061 NCU00823 NCU21627 NCU02224 NCU20278 NCU01547 NCU07365	72	0.71	5.83099	2.23216e-05
10.01.09.05 DNA conformation modification (e.g. chromatin)	11	5.06	NCU09436 NCU01634 NCU00212 NCU01635 NCU02437 NCU00043 NCU02435 NCU09778 NCU08823 NCU06679 NCU04770	110	1.09	4.6422	2.38225e-05
40.10.02 apoptosis (type I programmed cell death)	8	3.68	NCU09436 NCU02806 NCU20004 NCU00018 NCU05204 NCU02133 NCU00726 NCU04304	57	0.56	6.57143	2.73051e-05
10.01.09 DNA restriction or modification	11	5.06	NCU02435 NCU01635 NCU06679 NCU08823 NCU09778 NCU09436 NCU00043 NCU01634 NCU00212 NCU02437 NCU04770	113	1.12	4.51786	3.07003e-05
10.03.02 meiosis	9	4.14	NCU02437 NCU09778 NCU02393 NCU04142 NCU04054 NCU09212 NCU05942 NCU10061 NCU00043	75	0.74	5.59459	3.1147e-05
42.01 cell wall	13	5.99	NCU00043 NCU08909 NCU03911 NCU08297 NCU07167 NCU08823 NCU03515 NCU20876 NCU08820 NCU00957 NCU06781 NCU03795 NCU02393	156	1.54	3.88961	3.12171e-05
02.11 electron transport and membrane-associated energy conservation	11	5.06	NCU00018 NCU08093 NCU01680 NCU20004 NCU09816 NCU09119 NCU06695 NCU01606 NCU06606 NCU03340 NCU00959	116	1.15	4.4	3.92291e-05
02.13 respiration	12	5.52	NCU09816 NCU08093 NCU06606 NCU00959 NCU01606 NCU06695 NCU04304 NCU03559 NCU00951 NCU09212 NCU03340 NCU09119	138	1.37	4.0292	4.15635e-05
01.04 phosphate metabolism	18	8.29	NCU08823 NCU02797 NCU07296 NCU00018 NCU03795 NCU04054 NCU02393 NCU00951 NCU03515 NCU09212 NCU20004 NCU04142 NCU09778 NCU01378 NCU02513 NCU07173 NCU00043 NCU08297	287	2.85	2.90877	4.72149e-05
16.17 metal binding	17	7.83	NCU09778 NCU20876 NCU02011 NCU09816 NCU00951 NCU07296 NCU07887 NCU06695 NCU02393 NCU00147 NCU04387 NCU11395 NCU09659 NCU02133 NCU00959 NCU00043 NCU09333	262	2.6	3.01154	5.04374e-05
20.01.21 RNA transport	6	2.76	NCU01204 NCU09076 NCU01793 NCU02011 NCU01820 NCU04288	32	0.31	8.90323	5.31071e-05
14.10 assembly of protein complexes	13	5.99	NCU03050 NCU01332 NCU03795 NCU02289 NCU03515 NCU05227 NCU05427 NCU06679 NCU04054 NCU04370 NCU05995 NCU07173 NCU08297	165	1.63	3.67485	5.61712e-05
02.13.03 aerobic respiration	9	4.14	NCU06695 NCU00959 NCU09816 NCU04304 NCU00951 NCU03559 NCU01606 NCU09119 NCU06606	81	0.8	5.175	5.78569e-05
10.03.05 cell cycle dependent cytoskeleton reorganization	6	2.76	NCU08297 NCU03882 NCU03515 NCU03795 NCU04054 NCU20876	33	0.32	8.625	6.37513e-05
30.01.05.01 protein kinase	8	3.68	NCU08823 NCU02133 NCU02806 NCU09778 NCU02393 NCU02289 NCU07296 NCU00043	64	0.63	5.84127	6.42652e-05
41.01.01 mating (fertilization)	5	2.3	NCU07296 NCU03515 NCU08297 NCU04054 NCU03795	21	0.2	11.5	6.8256e-05
10.01.05.01 DNA repair	12	5.52	NCU03539 NCU02437 NCU09778 NCU03606 NCU20876 NCU00018 NCU07887 NCU09076 NCU20004 NCU09436 NCU06679 NCU02289	147	1.46	3.78082	7.71953e-05
32.01.09 DNA damage response	7	3.22	NCU02437 NCU09778 NCU02289 NCU09436 NCU07887 NCU02393 NCU03606	50	0.49	6.57143	8.92284e-05
18.02.01.01 enzyme activator	8	3.68	NCU07173 NCU02393 NCU01332 NCU04370 NCU02806 NCU02133 NCU09778 NCU05227	72	0.71	5.1831	0.000149934
02.45.15 energy generation (e.g. ATP synthase)	5	2.3	NCU09816 NCU04387 NCU01606 NCU08093 NCU09119	25	0.24	9.58333	0.000166113
11 TRANSCRIPTION	31	14.2	NCU00043 NCU02000 NCU04770 NCU00726 NCU01793 NCU02437 NCU21255 NCU03905 NCU02576 NCU05800 NCU00090 NCU09436 NCU09333 NCU02289 NCU06354 NCU06251 NCU02806 NCU03043 NCU09076 NCU02819 NCU01930 NCU02393 NCU10061 NCU02435 NCU06679 NCU08823 NCU09778 NCU00212 NCU01635 NCU20876 NCU01634	725	7.2	1.97222	0.000180116
16.19.03 ATP binding	17	7.83	NCU00018 NCU09778 NCU04142 NCU00290 NCU01606 NCU09076 NCU07697 NCU20004 NCU02393 NCU08823 NCU20876 NCU04370 NCU09119 NCU02289 NCU00775 NCU07296 NCU03539	292	2.9	2.7	0.000190166
02.19 metabolism of energy reserves (e.g. glycogen, trehalose)	6	2.76	NCU09778 NCU05429 NCU00043 NCU02797 NCU04142 NCU02806	40	0.39	7.07692	0.000194825
30.01.05 enzyme mediated signal transduction	11	5.06	NCU00043 NCU06679 NCU02393 NCU08823 NCU02133 NCU06561 NCU02289 NCU07296 NCU02806 NCU09778 NCU07173	139	1.38	3.66667	0.000202276
10.03.01.03 cell cycle checkpoints (checkpoints of morphogenesis, DNA-damage,-replication, mitotic phase and spindle)	6	2.76	NCU02393 NCU03606 NCU04288 NCU00043 NCU02437 NCU02806	42	0.41	6.73171	0.000256877
42.04.03 actin cytoskeleton	7	3.22	NCU03050 NCU01204 NCU03911 NCU07173 NCU06561 NCU00043 NCU08823	60	0.59	5.45763	0.000287511
20.09.16.09 vesicular cellular export	5	2.3	NCU03795 NCU03515 NCU08297 NCU08973 NCU01204	28	0.27	8.51852	0.000291518
20.09.16.09.03 exocytosis	5	2.3	NCU03795 NCU08973 NCU08297 NCU01204 NCU03515	28	0.27	8.51852	0.000291518
01.01.06.06.01 biosynthesis of lysine	4	1.84	NCU00775 NCU05977 NCU07697 NCU09532	16	0.15	12.2667	0.00031187
10.03.01.01.11 M phase	6	2.76	NCU20876 NCU04054 NCU02393 NCU04288 NCU02289 NCU09778	44	0.43	6.4186	0.000333495
41 DEVELOPMENT (Systemic)	6	2.76	NCU04054 NCU03515 NCU08297 NCU07296 NCU21236 NCU03795	45	0.44	6.27273	0.000377969
41.01 fungal/microorganismic development	6	2.76	NCU04054 NCU03795 NCU21236 NCU03515 NCU08297 NCU07296	45	0.44	6.27273	0.000377969
10.03.01.02 cell cycle arrest	4	1.84	NCU05204 NCU02393 NCU02806 NCU09778	17	0.16	11.5	0.000400977
18.02.05 regulator of G-protein signalling	4	1.84	NCU06679 NCU06561 NCU02393 NCU08823	17	0.16	11.5	0.000400977
16.07 structural protein binding	5	2.3	NCU01606 NCU04054 NCU04288 NCU03050 NCU02374	30	0.29	7.93103	0.00040814
40.10.02.04 regulation of apoptosis	2	0.92	NCU20004 NCU00018	2	0.01	92	0.00046264
32.07.07 oxygen and radical detoxification	5	2.3	NCU06031 NCU00355 NCU02133 NCU05780 NCU06556	31	0.3	7.66667	0.00047818
10.01.05 DNA recombination and DNA repair	12	5.52	NCU06679 NCU03606 NCU02437 NCU07887 NCU00018 NCU02289 NCU09436 NCU09076 NCU20876 NCU03539 NCU20004 NCU09778	181	1.79	3.0838	0.000539464
18.01.01 regulation by modification	6	2.76	NCU04370 NCU09778 NCU07296 NCU02393 NCU00043 NCU02806	49	0.48	5.75	0.000604075
20.01.26 neurotransmitter transport	3	1.38	NCU03515 NCU03795 NCU08297	9	0.08	17.25	0.000754051
30.01.05.01.03 MAPKKK cascade	4	1.84	NCU02806 NCU02393 NCU09778 NCU02133	20	0.19	9.68421	0.00077587
20.03 transport facilities	16	7.37	NCU08425 NCU20004 NCU00290 NCU01332 NCU09119 NCU08147 NCU20876 NCU01680 NCU00018 NCU04387 NCU10763 NCU05046 NCU03559 NCU01606 NCU06695 NCU04304	303	3.01	2.4485	0.000855583
01.05.25 regulation of C-compound and carbohydrate metabolism	8	3.68	NCU00043 NCU03515 NCU09778 NCU08297 NCU02393 NCU08823 NCU09333 NCU03795	93	0.92	4	0.000866958
10.03.03 cytokinesis (cell division) /septum formation and hydrolysis	8	3.68	NCU00043 NCU02393 NCU08823 NCU03515 NCU03795 NCU09778 NCU08297 NCU20876	94	0.93	3.95699	0.000930375
43.01.03.06 hyphae formation	3	1.38	NCU08823 NCU03593 NCU07296	10	0.09	15.3333	0.00106014
01.01.03.02.01 biosynthesis of glutamate	4	1.84	NCU07697 NCU00775 NCU04856 NCU02366	22	0.21	8.7619	0.0011325
20.09 transport routes	26	11.9	NCU04288 NCU00018 NCU03911 NCU04405 NCU03515 NCU20004 NCU08823 NCU03050 NCU20876 NCU02011 NCU01204 NCU08147 NCU02289 NCU03795 NCU02806 NCU01606 NCU07173 NCU01820 NCU05046 NCU04054 NCU08297 NCU08973 NCU09119 NCU04304 NCU04387 NCU01332	636	6.31	1.8859	0.0012023
20.01.01.01 cation transport (H+, Na+, K+, Ca2+ , NH4+, etc.)	9	4.14	NCU01606 NCU20876 NCU05046 NCU04387 NCU01332 NCU08147 NCU08093 NCU01680 NCU09119	122	1.21	3.42149	0.00126393
01.03 nucleotide/nucleoside/nucleobase metabolism	13	5.99	NCU08332 NCU03539 NCU03515 NCU03795 NCU01378 NCU02797 NCU09076 NCU08297 NCU04054 NCU07887 NCU09659 NCU08823 NCU07173	228	2.26	2.65044	0.00131088
02.45 energy conversion and regeneration	6	2.76	NCU09816 NCU01606 NCU00951 NCU09119 NCU04387 NCU08093	57	0.56	4.92857	0.00135887
01.01.06.06.01.01 diaminopimelic acid pathway	2	0.92	NCU05977 NCU09532	3	0.02	46	0.00136815
18.02.01.01.03 protease activator	2	0.92	NCU05227 NCU01332	3	0.02	46	0.00136815
01.05.02.07 sugar, glucoside, polyol and carboxylate catabolism	9	4.14	NCU07550 NCU01528 NCU05429 NCU07697 NCU00775 NCU00959 NCU04510 NCU02366 NCU02797	124	1.23	3.36585	0.00141707
20.01.01 ion transport	10	4.6	NCU09119 NCU08093 NCU04304 NCU08147 NCU04387 NCU01680 NCU20876 NCU01606 NCU01332 NCU05046	149	1.48	3.10811	0.00141787
14.04 protein targeting, sorting and translocation	12	5.52	NCU04288 NCU07173 NCU02806 NCU00018 NCU20004 NCU01820 NCU01332 NCU08823 NCU04371 NCU00726 NCU08973 NCU02011	203	2.01	2.74627	0.00147219
10.01.03 DNA synthesis and replication	8	3.68	NCU03606 NCU07887 NCU06556 NCU09778 NCU03539 NCU02289 NCU06679 NCU04370	101	1	3.68	0.00148569
01.05.02.04 sugar, glucoside, polyol and carboxylate anabolism	6	2.76	NCU02797 NCU00959 NCU00775 NCU07697 NCU01528 NCU02366	59	0.58	4.75862	0.00162814
40.01.03 directional cell growth (morphogenesis)	6	2.76	NCU20876 NCU00726 NCU02393 NCU08823 NCU06781 NCU06561	60	0.59	4.67797	0.0017771
10.03.01.01 mitotic cell cycle	8	3.68	NCU20876 NCU04054 NCU02289 NCU02393 NCU04288 NCU00043 NCU09778 NCU05204	104	1.03	3.57282	0.00179233
34.01.01.03 homeostasis of protons	5	2.3	NCU01606 NCU04387 NCU01332 NCU01680 NCU09119	42	0.41	5.60976	0.00197565
01.05.02 sugar, glucoside, polyol and carboxylate metabolism	10	4.6	NCU02366 NCU00775 NCU07697 NCU02393 NCU01528 NCU02797 NCU05429 NCU07550 NCU00959 NCU04510	156	1.54	2.98701	0.00199813
02.01 glycolysis and gluconeogenesis	6	2.76	NCU02797 NCU01528 NCU07550 NCU00775 NCU07697 NCU04510	63	0.62	4.45161	0.00228641
30.05 transmembrane signal transduction	6	2.76	NCU02393 NCU07296 NCU07173 NCU04054 NCU04371 NCU00726	63	0.62	4.45161	0.00228641
01.03.01 purin nucleotide/nucleoside/nucleobase metabolism	8	3.68	NCU07173 NCU01378 NCU03515 NCU03795 NCU08297 NCU04054 NCU08823 NCU09659	109	1.08	3.40741	0.00241252
30.01.05.05.01 small GTPase mediated signal transduction	5	2.3	NCU06679 NCU02806 NCU06561 NCU08823 NCU07173	44	0.43	5.34884	0.00243593
01.01.06.06 metabolism of lysine	4	1.84	NCU00775 NCU05977 NCU09532 NCU07697	27	0.26	7.07692	0.00249751
32.01.04 pH stress response	2	0.92	NCU05046 NCU08147	4	0.03	30.6667	0.0026974
40.10.02.02.02 caspase activation	2	0.92	NCU20004 NCU00018	4	0.03	30.6667	0.0026974
40.10.02.03.02 induction of apoptosis by intracellular signals	2	0.92	NCU05204 NCU09436	4	0.03	30.6667	0.0026974
34.01.01 homeostasis of cations	10	4.6	NCU09119 NCU01036 NCU08147 NCU01332 NCU01606 NCU05046 NCU01680 NCU02133 NCU04387 NCU04371	165	1.63	2.82209	0.00301121
14.07.05 modification by ubiquitination, deubiquitination	6	2.76	NCU20004 NCU02289 NCU00018 NCU04370 NCU05995 NCU05204	67	0.66	4.18182	0.00312768
10.03.01.01.03 G1/S transition of mitotic cell cycle	4	1.84	NCU05204 NCU00043 NCU09778 NCU02393	29	0.28	6.57143	0.00326822
16.17.09 heavy metal binding (Cu, Fe, Zn)	10	4.6	NCU02011 NCU09659 NCU09333 NCU06695 NCU00959 NCU07887 NCU09816 NCU02133 NCU11395 NCU00043	167	1.65	2.78788	0.00328416
20.09.07.27 vesicle fusion	3	1.38	NCU00018 NCU20004 NCU08973	15	0.14	9.85714	0.00371195
20.09.07.07 retrograde transport	2	0.92	NCU20004 NCU00018	5	0.04	23	0.00443186
16.21 complex cofactor/cosubstrate/vitamine binding	11	5.06	NCU01528 NCU02018 NCU04510 NCU06606 NCU09816 NCU06695 NCU02366 NCU00355 NCU00775 NCU07697 NCU00959	206	2.04	2.48039	0.00500313
32.01.07 unfolded protein response (e.g. ER quality control)	5	2.3	NCU00018 NCU20004 NCU05227 NCU02289 NCU04142	52	0.51	4.5098	0.00507367
30.05.02.24 G-protein coupled receptor signalling pathway	3	1.38	NCU07296 NCU04054 NCU07173	17	0.16	8.625	0.00537422
32.01.03 osmotic and salt stress response	5	2.3	NCU03911 NCU09778 NCU04371 NCU04510 NCU02393	53	0.52	4.42308	0.005506
30.01.05.01.06 serine/threonine kinase	3	1.38	NCU02393 NCU07296 NCU09778	18	0.17	8.11765	0.00634768
20.09.07.03 ER to Golgi transport	5	2.3	NCU07173 NCU08973 NCU08823 NCU20004 NCU00018	55	0.54	4.25926	0.0064476
30.01.05.05 G-protein mediated signal transduction	5	2.3	NCU08823 NCU06679 NCU07173 NCU06561 NCU02806	55	0.54	4.25926	0.0064476
20.09.14.01 tubulin dependent transport	2	0.92	NCU04405 NCU04054	6	0.05	18.4	0.00655361
01.05 C-compound and carbohydrate metabolism	27	12.4	NCU04510 NCU01378 NCU01509 NCU08823 NCU00775 NCU08669 NCU06781 NCU08297 NCU07697 NCU03795 NCU02366 NCU02393 NCU09333 NCU01528 NCU07550 NCU10063 NCU00043 NCU04674 NCU08909 NCU02797 NCU03515 NCU09778 NCU11395 NCU05429 NCU07277 NCU00959 NCU02018	759	7.54	1.64456	0.0067338
34.01 homeostasis	10	4.6	NCU01680 NCU01606 NCU05046 NCU08147 NCU01036 NCU04371 NCU01332 NCU04387 NCU09119 NCU02133	186	1.84	2.5	0.00698182
01.01.03.02 metabolism of glutamate	4	1.84	NCU04856 NCU07697 NCU00775 NCU02366	36	0.35	5.25714	0.00720856
32.05 disease, virulence and defense	10	4.6	NCU08669 NCU20004 NCU08823 NCU07167 NCU00823 NCU21177 NCU02018 NCU00018 NCU04054 NCU02282	187	1.85	2.48649	0.00724116
14.01 protein folding and stabilization	6	2.76	NCU04142 NCU20004 NCU00018 NCU04371 NCU00726 NCU01792	81	0.8	3.45	0.00793751
20.09.14 cytoskeleton-dependent transport	4	1.84	NCU03050 NCU04054 NCU04405 NCU03911	38	0.37	4.97297	0.00873649
10.03.02.01 meiosis I	2	0.92	NCU09778 NCU02393	7	0.06	15.3333	0.00904529
16.19.05 GTP binding	6	2.76	NCU08823 NCU08297 NCU04054 NCU03515 NCU07173 NCU03795	84	0.83	3.3253	0.00942892
16.21.01 heme binding	3	1.38	NCU09816 NCU00355 NCU06695	21	0.2	6.9	0.00986684
02.10 tricarboxylic-acid pathway (citrate cycle, Krebs cycle, TCA cycle)	4	1.84	NCU02366 NCU00775 NCU00959 NCU07697	40	0.39	4.71795	0.0104619
01 METABOLISM	51	23.5	NCU10063 NCU00018 NCU02366 NCU04510 NCU07697 NCU09778 NCU07173 NCU09076 NCU05164 NCU09212 NCU08669 NCU02018 NCU08909 NCU20004 NCU07550 NCU07887 NCU07296 NCU07277 NCU11395 NCU08297 NCU00043 NCU02797 NCU03795 NCU04054 NCU08823 NCU06781 NCU00959 NCU03515 NCU09333 NCU06031 NCU21177 NCU00775 NCU02393 NCU05977 NCU03539 NCU05780 NCU10763 NCU05429 NCU00147 NCU01378 NCU01528 NCU09532 NCU01509 NCU04856 NCU…	1740	17.2	1.36628	0.0111867
10.03.01.01.09 G2/M transition of mitotic cell cycle	3	1.38	NCU09778 NCU02393 NCU02289	22	0.21	6.57143	0.0112459
34.07 cell adhesion	3	1.38	NCU07173 NCU02806 NCU06561	22	0.21	6.57143	0.0112459
18.02.01.02.05 kinase inhibitior	2	0.92	NCU06679 NCU02806	8	0.07	13.1429	0.0118901
42.05 centrosome	2	0.92	NCU04054 NCU20876	8	0.07	13.1429	0.0118901
18.02.01.02 enzyme inhibitor	3	1.38	NCU06679 NCU02806 NCU06561	23	0.22	6.27273	0.0127306
20.01.10 protein transport	7	3.22	NCU20004 NCU00018 NCU02011 NCU04288 NCU01820 NCU07173 NCU08823	118	1.17	2.75214	0.0137802
42.04.05 microtubule cytoskeleton	4	1.84	NCU02289 NCU04054 NCU20876 NCU00043	44	0.43	4.27907	0.0145398
01.01.06.06.01.03 aminoadipic acid pathway	2	0.92	NCU00775 NCU07697	9	0.08	11.5	0.0150718
16.02 peptide binding	2	0.92	NCU02806 NCU00726	9	0.08	11.5	0.0150718
40.10.02.03 induction of apoptosis	2	0.92	NCU09436 NCU05204	9	0.08	11.5	0.0150718
30.01.09 second messenger mediated signal transduction	4	1.84	NCU08823 NCU20876 NCU04054 NCU04371	45	0.44	4.18182	0.0156955
10.03.05.01 spindle pole body/centrosome and microtubule cycle	3	1.38	NCU03882 NCU04054 NCU20876	25	0.24	5.75	0.0160212
16.21.08 Fe/S binding	3	1.38	NCU00959 NCU06606 NCU02366	26	0.25	5.52	0.0178287
01.01.05.03 metabolism of urea (urea cycle)	2	0.92	NCU09532 NCU05977	10	0.09	10.2222	0.0185748
30.05.02 non-enzymatic receptor mediated signalling	3	1.38	NCU07173 NCU04054 NCU07296	27	0.26	5.30769	0.0197451
20.09.16 cellular export and secretion	7	3.22	NCU07173 NCU03515 NCU08973 NCU02806 NCU03795 NCU08297 NCU01204	128	1.27	2.53543	0.0206698
32.05.01 resistance proteins	5	2.3	NCU20004 NCU04054 NCU00823 NCU00018 NCU02282	74	0.73	3.15068	0.0215332
40.10.02.02.01 apoptotic mitochondrial changes	1	0.46	NCU04304	1	0	0	0.0215577
40.10.02.02.03 disassembly of cell structures	1	0.46	NCU02133	1	0	0	0.0215577
01.01.05 metabolism of urea cycle, creatine and polyamines	3	1.38	NCU09532 NCU08669 NCU05977	28	0.27	5.11111	0.0217707
10.01.05.03 DNA recombination	4	1.84	NCU09076 NCU02437 NCU03606 NCU20876	50	0.49	3.7551	0.0223323
10.03.04.07 nuclear division	2	0.92	NCU20876 NCU09778	11	0.1	9.2	0.0223837
01.01.06 metabolism of the aspartate family	5	2.3	NCU00147 NCU00775 NCU05977 NCU09532 NCU07697	75	0.74	3.10811	0.0226801
20.09.18.09 vesicular cellular import	5	2.3	NCU03911 NCU07173 NCU02289 NCU08823 NCU01332	77	0.76	3.02632	0.0250912
20.09.18.09.01 endocytosis	5	2.3	NCU02289 NCU08823 NCU01332 NCU03911 NCU07173	77	0.76	3.02632	0.0250912
01.01.11.03.01 biosynthesis of valine	2	0.92	NCU07697 NCU00775	12	0.11	8.36364	0.0264839
01.03.07 deoxyribonucleotide metabolism	2	0.92	NCU07887 NCU03539	12	0.11	8.36364	0.0264839
30.01.09.03 Ca2+ mediated signal transduction	2	0.92	NCU04371 NCU20876	12	0.11	8.36364	0.0264839
34.11.03.03 chemotaxis	2	0.92	NCU08823 NCU02393	12	0.11	8.36364	0.0264839
32.01.01 oxidative stress response	4	1.84	NCU02133 NCU06031 NCU06556 NCU00355	53	0.52	3.53846	0.0270233
10.01.02 DNA topology	4	1.84	NCU20876 NCU09076 NCU03606 NCU02437	54	0.53	3.4717	0.028708
30.01.05.01.04 NIK-I-kappaB/NF-kappaB cascade	2	0.92	NCU02289 NCU00043	13	0.12	7.66667	0.0308612
40.01.05 growth regulators / regulation of cell size	2	0.92	NCU02289 NCU10777	13	0.12	7.66667	0.0308612
02.16 fermentation	4	1.84	NCU11395 NCU08669 NCU04510 NCU02366	56	0.55	3.34545	0.0322613
01.01.11.02.01 biosynthesis of isoleucine	2	0.92	NCU07697 NCU00775	14	0.13	7.07692	0.0355019
01.01.11.04.01 biosynthesis of leucine	2	0.92	NCU00775 NCU07697	14	0.13	7.07692	0.0355019
10.03.04.05 chromosome segregation/division	3	1.38	NCU00043 NCU04288 NCU04054	34	0.33	4.18182	0.0362121
34.11.03.13 osmosensing and response	3	1.38	NCU04510 NCU09778 NCU02393	35	0.34	4.05882	0.0389962
42.25 vacuole or lysosome	3	1.38	NCU01332 NCU07173 NCU06556	35	0.34	4.05882	0.0389962
18.02.01.01.05 kinase activator	2	0.92	NCU02133 NCU02806	15	0.14	6.57143	0.0403927
34.01.01.01 homeostasis of metal ions (Na, K, Ca etc.)	6	2.76	NCU01036 NCU08147 NCU02133 NCU04371 NCU01332 NCU05046	117	1.16	2.37931	0.0407173
11.02.03.04.01 transcription activation	3	1.38	NCU10061 NCU04770 NCU09333	36	0.35	3.94286	0.041886
18.01.03 regulation by localization	1	0.46	NCU02806	2	0.01	46	0.0426528
30.01.05.01.02 JNK cascade	1	0.46	NCU02393	2	0.01	46	0.0426528
11.02.03.01.01 transcription initiation	2	0.92	NCU04770 NCU09778	16	0.15	6.13333	0.0455207
20.09.04 mitochondrial transport	5	2.3	NCU04304 NCU01606 NCU09119 NCU20004 NCU00018	91	0.9	2.55556	0.0465506
01.01.03 assimilation of ammonia, metabolism of the glutamate group	4	1.84	NCU00775 NCU02366 NCU04856 NCU07697	64	0.63	2.92063	0.0489494
14.07.03 modification by phosphorylation, dephosphorylation, autophosphorylation	7	3.22	NCU07296 NCU02393 NCU09212 NCU04770 NCU02806 NCU00043 NCU09778	155	1.53	2.10458	0.0503875
32.01.05 heat shock response	3	1.38	NCU04510 NCU00043 NCU04142	39	0.38	3.63158	0.0511789
20.03.25 ABC transporters	3	1.38	NCU20004 NCU00290 NCU00018	41	0.4	3.45	0.0578812
32.07 detoxification	7	3.22	NCU06556 NCU06031 NCU02133 NCU01332 NCU05780 NCU21177 NCU00355	161	1.59	2.02516	0.0594575
01.01.11.03 metabolism of valine	2	0.92	NCU07697 NCU00775	19	0.18	5.11111	0.0622064
10.03.04.01 centromere/kinetochore complex maturation	1	0.46	NCU06679	3	0.02	23	0.0632951
18.02.01.02.01 GTPase inhibitor (GIP)	1	0.46	NCU06561	3	0.02	23	0.0632951
20.09.07.26 vesicle docking	1	0.46	NCU08973	3	0.02	23	0.0632951
11.04.03.01 splicing	6	2.76	NCU00726 NCU09076 NCU02000 NCU06354 NCU20876 NCU01930	131	1.3	2.12308	0.0638621
16.03.03 RNA binding	7	3.22	NCU00726 NCU01793 NCU01820 NCU09778 NCU09076 NCU01930 NCU06251	165	1.63	1.97546	0.0660295
01.01.11.02 metabolism of isoleucine	2	0.92	NCU00775 NCU07697	20	0.19	4.84211	0.0681635
10.03.04.09 nuclear migration	2	0.92	NCU04054 NCU04405	20	0.19	4.84211	0.0681635
16.21.07 NAD/NADP binding	5	2.3	NCU01528 NCU00775 NCU04510 NCU07697 NCU02018	103	1.02	2.2549	0.0715825
20.09.07.05 intra Golgi transport	2	0.92	NCU08973 NCU07173	21	0.2	4.6	0.0743
01.01.11 metabolism of the pyruvate family (alanine, isoleucine, leucine, valine) and D-alanine	3	1.38	NCU00775 NCU07697 NCU08669	46	0.45	3.06667	0.0763249
01.01.11.04 metabolism of leucine	2	0.92	NCU07697 NCU00775	22	0.21	4.38095	0.0806054
02.16.11 propionate fermentation	1	0.46	NCU02366	4	0.03	15.3333	0.0834944
30.05.01.18 transmembrane receptor protein serine/threonine kinase signalling pathways	1	0.46	NCU02393	4	0.03	15.3333	0.0834944
32.05.01.07 electromagnetic waves resistance (e.g. UV)	1	0.46	NCU04054	4	0.03	15.3333	0.0834944
32.07.07.01 catalase reaction	1	0.46	NCU00355	4	0.03	15.3333	0.0834944
34.05.07 ciliary/flagellar motility	1	0.46	NCU20876	4	0.03	15.3333	0.0834944
36.20 plant / fungal specific systemic sensing and response	1	0.46	NCU00726	4	0.03	15.3333	0.0834944
36.20.18 plant hormonal regulation	1	0.46	NCU00726	4	0.03	15.3333	0.0834944
42.03 cytoplasm	1	0.46	NCU07550	4	0.03	15.3333	0.0834944
16.17.07 magnesium binding	3	1.38	NCU07296 NCU09778 NCU02393	48	0.47	2.93617	0.084342
14.07.07 modification by ubiquitin-related proteins	2	0.92	NCU02289 NCU05204	23	0.22	4.18182	0.0870697
42.29 bud / growth tip	2	0.92	NCU00043 NCU01204	23	0.22	4.18182	0.0870697
20.09.13 vacuolar/lysosomal transport	5	2.3	NCU04387 NCU07173 NCU02289 NCU01332 NCU01204	114	1.13	2.0354	0.099874
18.02.09 regulator of transcription factor	2	0.92	NCU04770 NCU02393	25	0.24	3.83333	0.100436
01.01.03.01.01 biosynthesis of glutamine	1	0.46	NCU04856	5	0.04	11.5	0.10326
01.03.04.01 pyrimidine nucleotide/nucleoside/nucleobase catabolism	1	0.46	NCU09659	5	0.04	11.5	0.10326
01.03.13 regulation of nucleotide/nucleoside/nucleobase metabolism	1	0.46	NCU08823	5	0.04	11.5	0.10326
01.05.08 C-4 compound metabolism	1	0.46	NCU01378	5	0.04	11.5	0.10326
18.02.07 regulator of receptor activity	1	0.46	NCU08823	5	0.04	11.5	0.10326
20.09.18.09.01.01 receptor-mediated endocytosis	1	0.46	NCU07173	5	0.04	11.5	0.10326
32.07.07.05 peroxidase reaction	1	0.46	NCU06031	5	0.04	11.5	0.10326
32.07.07.07 superoxide metabolism	1	0.46	NCU02133	5	0.04	11.5	0.10326
34.05.02 motor activity	1	0.46	NCU20876	5	0.04	11.5	0.10326
32.05.01.03 chemical agent resistance	2	0.92	NCU20004 NCU00018	26	0.25	3.68	0.10732
34.11.12 perception of nutrients and nutritional adaptation	2	0.92	NCU06679 NCU08823	26	0.25	3.68	0.10732
01.03.01.01 purine nucleotide /nucleoside/nucleobase catabolism	1	0.46	NCU09659	6	0.05	9.2	0.122601
01.05.07 C-3 compound metabolism	1	0.46	NCU07550	6	0.05	9.2	0.122601
32.05.01.01 antibiotic resistance	1	0.46	NCU02282	6	0.05	9.2	0.122601
10.03.01.01.05 S phase of mitotic cell cycle	1	0.46	NCU09778	7	0.06	7.66667	0.141527
16.01.01 receptor binding	1	0.46	NCU08823	7	0.06	7.66667	0.141527
20.09.14.02 actin dependent transport	1	0.46	NCU03911	7	0.06	7.66667	0.141527
36 SYSTEMIC INTERACTION WITH THE ENVIRONMENT	1	0.46	NCU00726	7	0.06	7.66667	0.141527
42.10.05 nuclear membrane	1	0.46	NCU04288	7	0.06	7.66667	0.141527
20.09.01 nuclear transport	3	1.38	NCU02011 NCU01820 NCU04288	62	0.61	2.2623	0.149175
01.01 amino acid metabolism	10	4.6	NCU07697 NCU04510 NCU05977 NCU00147 NCU00775 NCU02366 NCU09532 NCU04856 NCU01378 NCU08669	319	3.16	1.4557	0.151574
01.05.03 polysaccharide metabolism	6	2.76	NCU08909 NCU04510 NCU06781 NCU04674 NCU07277 NCU05429	169	1.67	1.65269	0.158159
32.05.03 defense related proteins	2	0.92	NCU07167 NCU08669	33	0.32	2.875	0.158476
11.04.03.03 5'-end processing	1	0.46	NCU09076	8	0.07	6.57143	0.160047
34.11.03.11 pH response	1	0.46	NCU00090	8	0.07	6.57143	0.160047
14.07.09 posttranslational modification of amino acids (e.g. hydroxylation, methylation)	2	0.92	NCU07173 NCU04371	34	0.33	2.78788	0.166117
20.09.07 vesicular transport (Golgi network, etc.)	6	2.76	NCU00018 NCU08823 NCU02806 NCU20004 NCU08973 NCU07173	174	1.72	1.60465	0.173651
01.01.05.01.02 degradation of polyamines	1	0.46	NCU08669	9	0.08	5.75	0.178169
11.04.03 mRNA processing (splicing, 5'-, 3'-end processing)	6	2.76	NCU06354 NCU02000 NCU20876 NCU01930 NCU00726 NCU09076	177	1.75	1.57714	0.183237
01.20.17 metabolism of secondary products derived from primary amino acids	2	0.92	NCU08669 NCU04510	37	0.36	2.55556	0.189394
11.02.02 tRNA synthesis	2	0.92	NCU01793 NCU04770	37	0.36	2.55556	0.189394
11.02.03.01.07 transcription termination	1	0.46	NCU00043	10	0.09	5.11111	0.195901
32.07.07.03 glutathione conjugation reaction	1	0.46	NCU05780	10	0.09	5.11111	0.195901
01.06.05 fatty acid metabolism	3	1.38	NCU07550 NCU02393 NCU02018	71	0.7	1.97143	0.197111
20.01.09 peptide transport	1	0.46	NCU10763	11	0.1	4.6	0.213253
01.02 nitrogen, sulfur and selenium metabolism	5	2.3	NCU21177 NCU00043 NCU04856 NCU05780 NCU10763	150	1.49	1.54362	0.222815
01.05.02.01 nucleotide-sugar metabolism	1	0.46	NCU02797	12	0.11	4.18182	0.230232
30.01.09.07 cAMP/cGMP mediated signal transduction	1	0.46	NCU08823	12	0.11	4.18182	0.230232
34.11.01 photoperception and response	1	0.46	NCU04054	12	0.11	4.18182	0.230232
01.03.16 polynucleotide degradation	2	0.92	NCU09076 NCU08332	44	0.43	2.13953	0.245036
40.10.02.01 anti-apoptosis	1	0.46	NCU02806	13	0.12	3.83333	0.246846
12 PROTEIN SYNTHESIS	10	4.6	NCU08332 NCU09076 NCU00726 NCU04371 NCU08137 NCU05800 NCU08823 NCU00043 NCU01820 NCU01650	362	3.59	1.28134	0.255027
20.09.18 cellular import	6	2.76	NCU01332 NCU20876 NCU07173 NCU03911 NCU08823 NCU02289	200	1.98	1.39394	0.262787
01.02.02.09 catabolism of nitrogenous compounds	1	0.46	NCU21177	14	0.13	3.53846	0.263104
01.20.37.01 metabolism of thioredoxin, glutaredoxin, glutathion	1	0.46	NCU05780	14	0.13	3.53846	0.263104
42.27 extracellular / secretion proteins	1	0.46	NCU07277	14	0.13	3.53846	0.263104
11.02.03.01 general transcription activities	3	1.38	NCU09778 NCU00043 NCU04770	84	0.83	1.66265	0.271477
01.01.03.01 metabolism of glutamine	1	0.46	NCU04856	15	0.14	3.28571	0.279012
01.01.05.01 metabolism of polyamines	1	0.46	NCU08669	15	0.14	3.28571	0.279012
01.20.17.01 metabolism of nonprotein amino acids	1	0.46	NCU08669	15	0.14	3.28571	0.279012
01.20.17.09 metabolism of alkaloids	1	0.46	NCU04510	15	0.14	3.28571	0.279012
30.05.01 receptor enzyme mediated signalling	1	0.46	NCU02393	15	0.14	3.28571	0.279012
34.05.01 cell migration	1	0.46	NCU09778	15	0.14	3.28571	0.279012
40.01.03.01 regulation of directional cell growth	1	0.46	NCU08823	15	0.14	3.28571	0.279012
01.03.04 pyrimidine nucleotide/nucleoside/nucleobase metabolism	2	0.92	NCU09659 NCU02797	49	0.48	1.91667	0.285196
12.04.01 translation initiation	2	0.92	NCU09076 NCU08332	50	0.49	1.87755	0.293217
42.08 Golgi	1	0.46	NCU07173	16	0.15	3.06667	0.294578
43.03 animal cell type differentiation	1	0.46	NCU06679	16	0.15	3.06667	0.294578
01.20.19.01 metabolism of porphyrins	1	0.46	NCU05164	17	0.16	2.875	0.309809
20.03.01.01 ion channels	1	0.46	NCU04304	17	0.16	2.875	0.309809
32.07.09 detoxification by degradation	1	0.46	NCU21177	17	0.16	2.875	0.309809
11.04 RNA processing	8	3.68	NCU00726 NCU00043 NCU09076 NCU02000 NCU06354 NCU20876 NCU01793 NCU01930	298	2.96	1.24324	0.313931
01.20.37 metabolism of peptide derived compounds	1	0.46	NCU05780	18	0.17	2.70588	0.324713
12.07 translational control	2	0.92	NCU00043 NCU09076	54	0.53	1.73585	0.325148
01.20.19 metabolism of secondary products derived from glycine, L-serine and L-alanine	1	0.46	NCU05164	19	0.18	2.55556	0.339297
40.20 cell aging	1	0.46	NCU08823	19	0.18	2.55556	0.339297
14.07.02 modification with sugar residues (e.g. glycosylation, deglycosylation)	2	0.92	NCU02797 NCU07173	56	0.55	1.67273	0.340981
12.01 ribosome biogenesis	6	2.76	NCU01820 NCU05800 NCU08137 NCU08823 NCU01650 NCU04371	221	2.19	1.26027	0.341781
01.01.06.05.01 biosynthesis of methionine	1	0.46	NCU00147	20	0.19	2.42105	0.353567
01.04.04 regulation of phosphate metabolism	1	0.46	NCU09778	20	0.19	2.42105	0.353567
10.01.03.05 extension/ polymerization activity	1	0.46	NCU03606	20	0.19	2.42105	0.353567
32.01.11 nutrient starvation response	1	0.46	NCU00726	20	0.19	2.42105	0.353567
32.10 degradation / modification of foreign (exogenous) compounds	1	0.46	NCU04510	20	0.19	2.42105	0.353567
34.11.09 temperature perception and response	1	0.46	NCU00043	21	0.2	2.3	0.367531
32.05.05 virulence, disease factors	2	0.92	NCU02018 NCU21177	61	0.6	1.53333	0.380015
01.02.07 regulation of nitrogen, sulfur and selenium metabolism	1	0.46	NCU05780	24	0.23	2	0.407645
02.16.01 alcohol fermentation	1	0.46	NCU11395	24	0.23	2	0.407645
20.09.07.25 vesicle formation	1	0.46	NCU08823	24	0.23	2	0.407645
16.17.01 calcium binding	1	0.46	NCU20876	25	0.24	1.91667	0.420445
01.03.16.01 RNA degradation	1	0.46	NCU09076	27	0.26	1.76923	0.445226
20.03.01 channel / pore class transport	1	0.46	NCU04304	27	0.26	1.76923	0.445226
42.09 intracellular transport vesicles	1	0.46	NCU07173	29	0.28	1.64286	0.468951
01.02.02 nitrogen metabolism	1	0.46	NCU21177	30	0.29	1.58621	0.480432
01.01.06.05 metabolism of methionine	1	0.46	NCU00147	31	0.3	1.53333	0.491667
11.04.02 tRNA processing	1	0.46	NCU01793	31	0.3	1.53333	0.491667
14.07.04 modification by acetylation, deacetylation	1	0.46	NCU06679	32	0.31	1.48387	0.502659
02.07 pentose-phosphate pathway	1	0.46	NCU07550	34	0.33	1.39394	0.523939
01.05.13 transfer of activated C-1 groups	1	0.46	NCU08823	35	0.34	1.35294	0.534236
02.25 oxidation of fatty acids	1	0.46	NCU02393	38	0.37	1.24324	0.563818
11.04.01 rRNA processing	3	1.38	NCU09076 NCU00043 NCU20876	139	1.38	1	0.580005
99 UNCLASSIFIED PROTEINS	80	36.8	NCU02474 NCU07095 NCU11259 NCU08870 NCU00729 NCU08072 NCU00687 NCU01154 NCU04908 NCU04946 NCU09271 NCU03528 NCU06597 NCU09883 NCU06079 NCU00992 NCU20930 NCU00939 NCU08090 NCU20988 NCU00322 NCU03837 NCU04543 NCU09428 NCU11337 NCU01039 NCU01794 NCU02637 NCU07842 NCU09886 NCU00078 NCU08229 NCU09533 NCU02016 NCU05881 NCU21461 NCU00935 NCU01146 NCU06185 NCU06125 NCU08550 NCU21003 NCU05663 NCU05989 NCU…	5853	58.1	0.633391	1
01.06 lipid, fatty acid and isoprenoid metabolism	8	3.68	NCU08909 NCU06031 NCU02282 NCU04510 NCU02018 NCU01378 NCU02393 NCU07550	400	3.97	0.926952	1
01.06.06 isoprenoid metabolism	1	0.46	NCU04510	74	0.73	0.630137	1
01.06.06.11 tetracyclic and pentacyclic triterpenes (cholesterin, steroids and hopanoids) metabolism	1	0.46	NCU04510	50	0.49	0.938776	1
01.07 metabolism of vitamins, cofactors, and prosthetic groups	3	1.38	NCU01378 NCU02018 NCU04510	176	1.74	0.793103	1
01.07.01 biosynthesis of vitamins, cofactors, and prosthetic groups	1	0.46	NCU02018	110	1.09	0.422018	1
01.20 secondary metabolism	4	1.84	NCU04510 NCU05164 NCU08669 NCU05780	245	2.43	0.757202	1
11.02.01 rRNA synthesis	1	0.46	NCU04770	51	0.5	0.92	1
12.01.01 ribosomal proteins	1	0.46	NCU08137	152	1.51	0.304636	1
12.04 translation	4	1.84	NCU08332 NCU08823 NCU00726 NCU09076	188	1.86	0.989247	1
20.01.27 drug/toxin transport	1	0.46	NCU00823	67	0.66	0.69697	1
42.16 mitochondrion	1	0.46	NCU04304	85	0.84	0.547619	1

## Sheet: P7
Δcdt2/WT-AV	annotation	Δcdt2/WT-XN	annotation	NC/WT-XN	annotation	NC/WT-AV	annotation
NCU00010	heavy metal tolerance protein	NCU00010	heavy metal tolerance protein	NCU00003	hypothetical protein	NCU00003	hypothetical protein
NCU00018	cell division control protein Cdc48	NCU00021	hypothetical protein	NCU00018	cell division control protein Cdc48	NCU00004	universal stress protein family domain-containing protein
NCU00023	ferric reductase	NCU00024	yippee zinc-binding protein	NCU00021	hypothetical protein	NCU00023	ferric reductase
NCU00043	serine/threonine-protein phosphatase PP1	NCU00025	integral membrane protein	NCU00024	yippee zinc-binding protein	NCU00025	integral membrane protein
NCU00078	hypothetical protein	NCU00034	prenyl cysteine carboxyl methyltransferase Ste14	NCU00025	integral membrane protein	NCU00061	hypothetical protein
NCU00083	hypothetical protein	NCU00040	eukaryotic translation initiation factor 3 110 kDa subunit	NCU00026	hypothetical protein	NCU00130	beta-glucosidase
NCU00090	pH-response transcription factor pacC/RIM101	NCU00050	pyruvate dehydrogenase X component	NCU00034	prenyl cysteine carboxyl methyltransferase Ste14	NCU00135	phosphatidyl synthase
NCU00122	aspartyl aminopeptidase	NCU00080	DUF1295 domain-containing protein	NCU00035	diacylglycerol O-acyltransferase	NCU00169	translocation complex componenet
NCU00127	hypothetical protein	NCU00083	hypothetical protein	NCU00040	eukaryotic translation initiation factor 3 110 kDa subunit	NCU00171	calmodulin
NCU00130	beta-glucosidase	NCU00087	6-phosphogluconolactonase	NCU00041	guanine nucleotide-binding protein subunit gamma	NCU00175	hypothetical protein
NCU00147	ARD/ARD family protein	NCU00102	hypothetical protein	NCU00043	serine/threonine-protein phosphatase PP1	NCU00206	cellobiose dehydrogenase
NCU00175	hypothetical protein	NCU00106	glutamate 5-kinase	NCU00050	pyruvate dehydrogenase X component	NCU00212	histone h4
NCU00206	cellobiose dehydrogenase	NCU00115	rRNA-processing protein FCF2	NCU00067	dolichyl-phosphate mannosyltransferase polypeptide 2	NCU00223	bZIP transcription factor
NCU00212	histone h4	NCU00127	hypothetical protein	NCU00072	hypothetical protein	NCU00236	flavoprotein oxygenase
NCU00222	hypothetical protein	NCU00129	AMP-binding domain-containing protein	NCU00080	DUF1295 domain-containing protein	NCU00248	hypothetical protein
NCU00225	hypothetical protein	NCU00130	beta-glucosidase	NCU00097	hypothetical protein	NCU00289	TAH-1
NCU00226	MFS transporter	NCU00175	hypothetical protein	NCU00102	hypothetical protein	NCU00292	cholinesterase
NCU00258	40s ribosomal protein s7	NCU00177	phosphoribosylformylglycinamidine cyclo-ligase	NCU00106	glutamate 5-kinase	NCU00316	peroxisomal adenine nucleotide transporter 1
NCU00290	ABC transporter	NCU00187	carboxyvinyl-carboxyphosphonate phosphorylmutase	NCU00112	aminopeptidase P	NCU00322	hypothetical protein
NCU00292	cholinesterase	NCU00188	ATG1 protein	NCU00127	hypothetical protein	NCU00326	calcium homeostasis protein Regucalcin
NCU00304	hypothetical protein	NCU00202	coronin-6	NCU00130	beta-glucosidase	NCU00385	ATP synthase subunit delta
NCU00315	60S ribosomal protein L29	NCU00212	histone h4	NCU00135	phosphatidyl synthase	NCU00397	hypothetical protein
NCU00322	hypothetical protein	NCU00225	hypothetical protein	NCU00160	NADH:ubiquinone oxidoreductase 6.6kD subunit	NCU00399	cell wall protein PhiA
NCU00326	calcium homeostasis protein Regucalcin	NCU00226	MFS transporter	NCU00171	calmodulin	NCU00430	Na(+)/H（+) antiporter 2
NCU00332	hypothetical protein	NCU00227	mitochondrial cation transporter	NCU00175	hypothetical protein	NCU00447	serine palmitoyltransferase 2
NCU00355	catalase-3	NCU00236	flavoprotein oxygenase	NCU00177	phosphoribosylformylglycinamidine cyclo-ligase	NCU00449	hypothetical protein
NCU00413	60S ribosomal protein L2	NCU00247	hypothetical protein	NCU00187	carboxyvinyl-carboxyphosphonate phosphorylmutase	NCU00450	sucrose transporter
NCU00449	hypothetical protein	NCU00248	hypothetical protein	NCU00198	mitochondrial import inner membrane translocase subunit tim-9	NCU00461	NAD-specific glutamate dehydrogenase
NCU00464	60S ribosomal protein L32	NCU00250	hypothetical protein	NCU00202	coronin-6	NCU00475	40S ribosomal protein S18
NCU00477	carboxypeptidase Y	NCU00258	40s ribosomal protein s7	NCU00212	histone h4	NCU00477	carboxypeptidase Y
NCU00489	cytoplasmic ribosomal protein 10	NCU00260	oxidoreductase	NCU00222	hypothetical protein	NCU00521	hypothetical protein
NCU00499	all development altered-1	NCU00261	CTP synthase	NCU00225	hypothetical protein	NCU00522	cystathionine beta-lyase
NCU00537	hypothetical protein	NCU00264	hypothetical protein	NCU00226	MFS transporter	NCU00537	hypothetical protein
NCU00559	hypothetical protein	NCU00265	hypothetical protein	NCU00227	mitochondrial cation transporter	NCU00541	hypothetical protein
NCU00562	hypothetical protein	NCU00270	hypothetical protein	NCU00242	V-SNARE	NCU00552	phytoene desaturase
NCU00575	glucokinase	NCU00292	cholinesterase	NCU00245	hypothetical protein	NCU00565	lipoic acid synthetase
NCU00586	non-anchored cell wall protein 6	NCU00294	60S ribosomal protein L10a	NCU00248	hypothetical protein	NCU00566	synaptobrevin
NCU00590	hypothetical protein	NCU00304	hypothetical protein	NCU00250	hypothetical protein	NCU00573	hypothetical protein
NCU00591	methylcrotonoyl-CoA carboxylase subunit alpha	NCU00309	WSC domain-containing protein	NCU00253	hypothetical protein	NCU00575	glucokinase
NCU00618	40S ribosomal protein S27	NCU00315	60S ribosomal protein L29	NCU00258	40s ribosomal protein s7	NCU00582	cryptochrome DASH
NCU00633	hypothetical protein	NCU00332	hypothetical protein	NCU00260	oxidoreductase	NCU00584	hypothetical protein
NCU00634	ribosomal protein L14	NCU00355	catalase-3	NCU00261	CTP synthase	NCU00585	phytoene synthase
NCU00673	serine protease p2	NCU00366	eukaryotic translation initiation factor 5	NCU00264	hypothetical protein	NCU00586	non-anchored cell wall protein 6
NCU00680	2-methylcitrate dehydratase	NCU00385	ATP synthase subunit delta	NCU00265	hypothetical protein	NCU00589	auxin Efflux Carrier superfamily protein
NCU00687	hypothetical protein	NCU00389	developmentally regulated GTP-binding protein 1	NCU00268	hypothetical protein	NCU00591	methylcrotonoyl-CoA carboxylase subunit alpha
NCU00706	60S ribosomal protein L44	NCU00405	glycyl-tRNA synthetase 1	NCU00270	hypothetical protein	NCU00595	ubiquitin thiolesterase
NCU00709	beta-xylosidase	NCU00410	eukaryotic release factor 1	NCU00282	hypothetical protein	NCU00627	hypothetical protein
NCU00710	acetyl xylan esterase	NCU00413	60S ribosomal protein L2	NCU00289	TAH-1	NCU00669	oligosaccharyl transferase subunit
NCU00721	proline-specific permease	NCU00419	DNA-directed RNA polymerase I and III polypeptide	NCU00290	ABC transporter	NCU00680	2-methylcitrate dehydratase
NCU00726	peptidyl-prolyl cis-trans isomerase	NCU00431	mitochondrial import receptor subunit Tom22	NCU00292	cholinesterase	NCU00682	serine/threonine-protein kinase PRKX
NCU00729	hypothetical protein	NCU00434	protein phosphatase 2C isoform beta	NCU00294	60S ribosomal protein L10a	NCU00699	hypothetical protein
NCU00744	hypothetical protein	NCU00446	acetoacetyl-CoA synthase	NCU00302	3-ketodihydrosphingosine reductase tsc-10	NCU00706	60S ribosomal protein L44
NCU00762	endoglucanase 3	NCU00450	sucrose transporter	NCU00309	WSC domain-containing protein	NCU00709	beta-xylosidase
NCU00763	hypothetical protein	NCU00457	translation initiation factor 4B	NCU00315	60S ribosomal protein L29	NCU00710	acetyl xylan esterase
NCU00775	isocitrate dehydrogenase subunit 1	NCU00461	NAD-specific glutamate dehydrogenase	NCU00316	peroxisomal adenine nucleotide transporter 1	NCU00721	proline-specific permease
NCU00801	MFS lactose permease	NCU00464	60S ribosomal protein L32	NCU00321	hypothetical protein	NCU00726	peptidyl-prolyl cis-trans isomerase
NCU00811	hypothetical protein	NCU00465	chaperone dnaJ	NCU00322	hypothetical protein	NCU00729	hypothetical protein
NCU00821	sugar transporter	NCU00475	40S ribosomal protein S18	NCU00332	hypothetical protein	NCU00744	hypothetical protein
NCU00823	26S proteasome regulatory subunit RPN11	NCU00477	carboxypeptidase Y	NCU00340	transcription factor steA	NCU00748	hypothetical protein
NCU00831	extracellular serine carboxypeptidase	NCU00489	cytoplasmic ribosomal protein 10	NCU00355	catalase-3	NCU00762	endoglucanase 3
NCU00836	hypothetical protein	NCU00499	all development altered-1	NCU00366	eukaryotic translation initiation factor 5	NCU00763	hypothetical protein
NCU00870	hypothetical protein	NCU00520	oxidoreductase	NCU00373	hypothetical protein	NCU00766	hypothetical protein
NCU00890	beta-mannosidase	NCU00537	hypothetical protein	NCU00378	aldehyde dehydrogenase	NCU00793	trehalose phosphate synthase
NCU00891	xylitol dehydrogenase	NCU00552	phytoene desaturase	NCU00397	hypothetical protein	NCU00801	MFS lactose permease
NCU00935	hypothetical protein	NCU00554	aspartate-semialdehyde dehydrogenase	NCU00399	cell wall protein PhiA	NCU00813	disulfide isomerase
NCU00936	succinate semialdehyde dehydrogenase	NCU00567	Arg-6 protein	NCU00405	glycyl-tRNA synthetase 1	NCU00821	sugar transporter
NCU00939	hypothetical protein	NCU00586	non-anchored cell wall protein 6	NCU00410	eukaryotic release factor 1	NCU00831	extracellular serine carboxypeptidase
NCU00951	inorganic pyrophosphatase	NCU00590	hypothetical protein	NCU00413	60S ribosomal protein L2	NCU00836	hypothetical protein
NCU00957	anchored cell wall protein 2	NCU00591	methylcrotonoyl-CoA carboxylase subunit alpha	NCU00414	adenosine kinase	NCU00870	hypothetical protein
NCU00959	succinate dehydrogenase iron-sulfur protein	NCU00602	siroheme synthase	NCU00434	protein phosphatase 2C isoform beta	NCU00881	hypothetical protein
NCU00971	ribosomal protein S12	NCU00618	40S ribosomal protein S27	NCU00435	SNF7 family protein	NCU00884	NAD dependent epimerase/dehydratase
NCU00972	arabinogalactan endo-1,4-beta-galactosidase	NCU00634	ribosomal protein L14	NCU00440	guanine nucleotide-binding protein beta subunit	NCU00890	beta-mannosidase
NCU00979	60S acidic ribosomal protein P2	NCU00635	nascent polypeptide-associated complex subunit alpha	NCU00450	sucrose transporter	NCU00891	xylitol dehydrogenase
NCU00992	hypothetical protein	NCU00643	L-arabinitol 4-dehydrogenase	NCU00457	translation initiation factor 4B	NCU00911	polysaccharide synthase Cps1p
NCU00999	hypothetical protein	NCU00644	ATP synthase subunit G	NCU00461	NAD-specific glutamate dehydrogenase	NCU00939	hypothetical protein
NCU01033	hypothetical protein	NCU00673	serine protease p2	NCU00464	60S ribosomal protein L32	NCU00951	inorganic pyrophosphatase
NCU01036	DUF907 domain-containing protein	NCU00677	phenylacetyl-CoA ligase	NCU00475	40S ribosomal protein S18	NCU00955	monooxygenase
NCU01039	hypothetical protein	NCU00680	2-methylcitrate dehydratase	NCU00477	carboxypeptidase Y	NCU00957	anchored cell wall protein 2
NCU01050	endoglucanase II	NCU00684	endonuclease/Exonuclease/phosphatase	NCU00489	cytoplasmic ribosomal protein 10	NCU00959	succinate dehydrogenase iron-sulfur protein
NCU01064	hypothetical protein	NCU00685	casein kinase I isoform delta	NCU00499	all development altered-1	NCU00965	hypothetical protein
NCU01076	hypothetical protein	NCU00692	chaperone dnaK	NCU00537	hypothetical protein	NCU00972	arabinogalactan endo-1,4-beta-galactosidase
NCU01107	short-chain dehydrogenase	NCU00706	60S ribosomal protein L44	NCU00541	hypothetical protein	NCU00979	60S acidic ribosomal protein P2
NCU01146	signal sequence receptor alpha chain	NCU00709	beta-xylosidase	NCU00552	phytoene desaturase	NCU00985	hydrolase
NCU01154	submerged protoperithecia-1	NCU00712	3-hydroxy-3-methylglutaryl-coenzyme A reductase	NCU00554	aspartate-semialdehyde dehydrogenase	NCU00992	hypothetical protein
NCU01195	Glu/Leu/Phe/Val dehydrogenase	NCU00721	proline-specific permease	NCU00561	hypothetical protein	NCU00995	hypothetical protein
NCU01197	cell wall biogenesis protein phosphatase Ssd1	NCU00729	hypothetical protein	NCU00566	synaptobrevin	NCU01050	endoglucanase II
NCU01204	tropomyosin	NCU00744	hypothetical protein	NCU00567	Arg-6 protein	NCU01056	hypothetical protein
NCU01219	glutaredoxin	NCU00766	hypothetical protein	NCU00573	hypothetical protein	NCU01058	hypothetical protein
NCU01221	60S ribosomal protein L16	NCU00768	mRNA binding post-transcriptional regulator	NCU00580	acyl-CoA thioesterase	NCU01059	glycosyl hydrolase family 47 protein
NCU01231	carboxylic acid transporter	NCU00782	pantothenate transporter liz1	NCU00585	phytoene synthase	NCU01063	hypothetical protein
NCU01317	60S ribosomal protein L12	NCU00790	potassium transporter hak-1	NCU00586	non-anchored cell wall protein 6	NCU01064	hypothetical protein
NCU01320	glutathione S-transferase	NCU00792	branched-chain-amino-acid aminotransferase	NCU00589	auxin Efflux Carrier superfamily protein	NCU01076	hypothetical protein
NCU01328	transketolase	NCU00801	MFS lactose permease	NCU00591	methylcrotonoyl-CoA carboxylase subunit alpha	NCU01107	short-chain dehydrogenase
NCU01332	vacuolar ATP synthase proteolipid subunit	NCU00809	MFS monosaccharide transporter	NCU00596	lipoyltransferase	NCU01140	NAD(P) transhydrogenase
NCU01368	proteasome component C11	NCU00810	beta-galactosidase	NCU00598	thioredoxin	NCU01145	hypothetical protein
NCU01378	acetoacetyl-CoA synthase	NCU00811	hypothetical protein	NCU00618	40S ribosomal protein S27	NCU01146	signal sequence receptor alpha chain
NCU01391	hypothetical protein	NCU00821	sugar transporter	NCU00627	hypothetical protein	NCU01181	acyl-CoA dehydrogenase family member 11
NCU01402	indoleamine 2,3-dioxygenase	NCU00831	extracellular serine carboxypeptidase	NCU00634	ribosomal protein L14	NCU01193	hypothetical protein
NCU01417	propionate-CoA ligase	NCU00843	phosphoribosylglycinamide formyltransferase	NCU00635	nascent polypeptide-associated complex subunit alpha	NCU01195	Glu/Leu/Phe/Val dehydrogenase
NCU01418	clock-controlled gene-6	NCU00884	NAD dependent epimerase/dehydratase	NCU00642	beta-galactosidase	NCU01200	peptidyl-prolyl cis-trans isomerase B
NCU01424	DUF636 domain-containing protein	NCU00891	xylitol dehydrogenase	NCU00643	L-arabinitol 4-dehydrogenase	NCU01219	glutaredoxin
NCU01427	geranylgeranyl pyrophosphate synthetase	NCU00892	tetrahydrofolylpolyglutamate synthase	NCU00644	ATP synthase subunit G	NCU01240	hypothetical protein
NCU01430	hypothetical protein	NCU00894	hypothetical protein	NCU00655	mitochondrial enoyl reductase	NCU01305	rhomboid family membrane protein
NCU01452	40S ribosomal protein S1	NCU00915	aspartyl-tRNA synthetase	NCU00659	hypothetical protein	NCU01315	UDP-N-acetylglucosaminyltransferase
NCU01467	NADH:ubiquinone oxidoreductase 10.4kD subunit	NCU00925	pescadillo	NCU00667	vacuolar membrane ATPase 11	NCU01320	glutathione S-transferase
NCU01483	hypothetical protein	NCU00936	succinate semialdehyde dehydrogenase	NCU00673	serine protease p2	NCU01328	transketolase
NCU01487	hypothetical protein	NCU00937	beta-glucuronidase	NCU00677	phenylacetyl-CoA ligase	NCU01353	mixed-linked glucanase
NCU01489	hypothetical protein	NCU00957	anchored cell wall protein 2	NCU00687	hypothetical protein	NCU01402	indoleamine 2,3-dioxygenase
NCU01509	hypothetical protein	NCU00963	methylenetetrahydrofolate dehydrogenase	NCU00692	chaperone dnaK	NCU01418	clock-controlled gene-6
NCU01510	meiotically up-regulated 190 protein	NCU00966	DUF850 domain-containing protein	NCU00699	hypothetical protein	NCU01424	DUF636 domain-containing protein
NCU01528	glyceraldehyde 3-phosphate-dehydrogenase	NCU00971	ribosomal protein S12	NCU00706	60S ribosomal protein L44	NCU01428	hydroxyisourate hydrolase
NCU01547	26S proteasome regulatory subunit rpn-8	NCU00979	60S acidic ribosomal protein P2	NCU00709	beta-xylosidase	NCU01429	phosphoserine aminotransferase
NCU01552	ribosomal protein S28	NCU00995	hypothetical protein	NCU00712	3-hydroxy-3-methylglutaryl-coenzyme A reductase	NCU01430	hypothetical protein
NCU01555	hypothetical protein	NCU00999	hypothetical protein	NCU00714	heat shock protein STI1	NCU01444	rheb small monomeric GTPase RhbA
NCU01560	hypothetical protein	NCU01001	hypothetical protein	NCU00721	proline-specific permease	NCU01449	GTP cyclohydrolase II
NCU01565	hypothetical protein	NCU01021	eukaryotic translation initiation factor 3 subunit EifCf	NCU00726	peptidyl-prolyl cis-trans isomerase	NCU01451	hypothetical protein
NCU01606	ATP synthase subunit 5	NCU01033	hypothetical protein	NCU00729	hypothetical protein	NCU01483	hypothetical protein
NCU01633	hexose transporter HXT13	NCU01051	hypothetical protein	NCU00744	hypothetical protein	NCU01487	hypothetical protein
NCU01634	histone h4	NCU01064	hypothetical protein	NCU00766	hypothetical protein	NCU01504	calcineurin binding protein
NCU01635	histone H3	NCU01065	ammonium transporter MEP2	NCU00768	mRNA binding post-transcriptional regulator	NCU01510	meiotically up-regulated 190 protein
NCU01636	2-hydroxychromene-2-carboxylate isomerase	NCU01068	BAR domain-containing protein	NCU00774	hypothetical protein	NCU01517	glucoamylase
NCU01650	hypothetical protein	NCU01083	S-adenosylmethionine decarboxylase	NCU00775	isocitrate dehydrogenase subunit 1	NCU01528	glyceraldehyde 3-phosphate-dehydrogenase
NCU01680	plasma membrane ATPase	NCU01107	short-chain dehydrogenase	NCU00782	pantothenate transporter liz1	NCU01535	hypothetical protein
NCU01704	NADP:D-xylose dehydrogenase	NCU01132	MFS monosaccharide transporter	NCU00789	DUF221 domain-containing protein	NCU01545	autophagy protein 8
NCU01720	hypothetical protein	NCU01136	hypothetical protein	NCU00792	branched-chain-amino-acid aminotransferase	NCU01546	coproporphyrinogen III oxidase
NCU01740	histone H2A.Z-specific chaperone chz-1	NCU01145	hypothetical protein	NCU00803	MFS transporter	NCU01548	hypothetical protein
NCU01754	alcohol dehydrogenase I	NCU01179	outer membrane translocase 40 kDa subunit	NCU00805	bZIP transcription factor	NCU01559	hypothetical protein
NCU01776	60S ribosomal protein L15	NCU01181	acyl-CoA dehydrogenase family member 11	NCU00810	beta-galactosidase	NCU01633	hexose transporter HXT13
NCU01777	PSP1 domain-containing protein	NCU01195	Glu/Leu/Phe/Val dehydrogenase	NCU00811	hypothetical protein	NCU01634	histone h4
NCU01781	hypothetical protein	NCU01197	cell wall biogenesis protein phosphatase Ssd1	NCU00821	sugar transporter	NCU01635	histone H3
NCU01792	heat shock protein 90-associated	NCU01202	hypothetical protein	NCU00825	hypothetical protein	NCU01636	2-hydroxychromene-2-carboxylate isomerase
NCU01793	RNA binding domain-containing protein	NCU01219	glutaredoxin	NCU00828	peroxisomal membrane protein	NCU01640	C2H2 transcription factor
NCU01794	hypothetical protein	NCU01221	60S ribosomal protein L16	NCU00831	extracellular serine carboxypeptidase	NCU01654	long-chain-fatty-acid-CoA ligase 1
NCU01815	hypothetical protein	NCU01227	succinyl-CoA ligase alpha-chain	NCU00859	hypothetical protein	NCU01680	plasma membrane ATPase
NCU01820	exportin-1	NCU01230	serum paraoxonase/arylesterase	NCU00864	TIM-barrel enzyme family protein	NCU01689	mitochondrial DNA replication protein YHM2
NCU01827	60S ribosomal protein L27	NCU01231	carboxylic acid transporter	NCU00870	hypothetical protein	NCU01692	mitochondrial citrate synthase
NCU01830	4-hydroxyphenylpyruvate dioxygenase	NCU01233	aldose reductase	NCU00877	hypothetical protein	NCU01704	NADP:D-xylose dehydrogenase
NCU01835	hypothetical protein	NCU01234	eukaryotic initiation factor 4A-12	NCU00881	hypothetical protein	NCU01720	hypothetical protein
NCU01838	nitrilase	NCU01241	mitochondrial carrier protein	NCU00884	NAD dependent epimerase/dehydratase	NCU01744	glutamate synthase
NCU01861	short chain dehydrogenase/reductase family protein	NCU01257	hypothetical protein	NCU00891	xylitol dehydrogenase	NCU01748	hypothetical protein
NCU01866	lactonohydrolase	NCU01258	cyanase	NCU00892	tetrahydrofolylpolyglutamate synthase	NCU01754	alcohol dehydrogenase I
NCU01900	xylosidase/arabinosidase	NCU01271	ornithine decarboxylase	NCU00895	RAB GTPase Ypt5	NCU01763	hypothetical protein
NCU01906	GCY protein	NCU01279	ER membrane protein	NCU00911	polysaccharide synthase Cps1p	NCU01769	hypothetical protein
NCU01930	U6 snRNP-associated protein Lsm7	NCU01285	hypothetical protein	NCU00916	membrane bound cation transporter	NCU01794	hypothetical protein
NCU01944	hypothetical protein	NCU01290	centromere/microtubule-binding protein CBF5	NCU00918	hypothetical protein	NCU01807	hypothetical protein
NCU01948	ribosomal protein Srp1	NCU01300	imidazoleglycerol-phosphate dehydratase	NCU00925	pescadillo	NCU01808	cytochrome c
NCU01949	40S ribosomal protein S9	NCU01317	60S ribosomal protein L12	NCU00935	hypothetical protein	NCU01813	high affinity glucose transporter
NCU01957	AR2	NCU01320	glutathione S-transferase	NCU00937	beta-glucuronidase	NCU01816	allantoicase
NCU01958	mating-type protein A-1	NCU01328	transketolase	NCU00955	monooxygenase	NCU01824	UDP-galactopyranose mutase
NCU01966	60S ribosomal protein L37	NCU01331	snRNP and snoRNP protein	NCU00957	anchored cell wall protein 2	NCU01835	hypothetical protein
NCU01989	hypothetical protein	NCU01333	Delta（24（24（1)))-sterol reductase	NCU00959	succinate dehydrogenase iron-sulfur protein	NCU01845	phosphoglycerate mutase family domain-containing protein
NCU02000	splicing factor 3B subunit 10	NCU01353	mixed-linked glucanase	NCU00963	methylenetetrahydrofolate dehydrogenase	NCU01856	transcriptional activator hac1
NCU02008	hypothetical protein	NCU01369	ATP-dependent RNA helicase ded-1	NCU00966	DUF850 domain-containing protein	NCU01861	short chain dehydrogenase/reductase family protein
NCU02009	FreB protein	NCU01376	alkaline phosphatase	NCU00971	ribosomal protein S12	NCU01866	lactonohydrolase
NCU02011	importin subunit beta-1	NCU01402	indoleamine 2,3-dioxygenase	NCU00979	60S acidic ribosomal protein P2	NCU01871	hypothetical protein
NCU02016	hypothetical protein	NCU01409	ran-binding protein	NCU00985	hydrolase	NCU01873	hypothetical protein
NCU02018	short chain dehydrogenase	NCU01417	propionate-CoA ligase	NCU00988	MFS quinate transporter	NCU01886	hypothetical protein
NCU02031	hypothetical protein	NCU01418	clock-controlled gene-6	NCU00995	hypothetical protein	NCU01900	xylosidase/arabinosidase
NCU02041	anchored cell wall protein 11	NCU01422	multiprotein-bridging factor 1	NCU00999	hypothetical protein	NCU01906	GCY protein
NCU02059	endothiapepsin	NCU01427	geranylgeranyl pyrophosphate synthetase	NCU01021	eukaryotic translation initiation factor 3 subunit EifCf	NCU01911	GDP/GTP exchange factor Sec2p
NCU02075	heat shock protein 70	NCU01428	hydroxyisourate hydrolase	NCU01039	hypothetical protein	NCU01924	hypothetical protein
NCU02114	G1/S-specific cyclin Cln1	NCU01430	hypothetical protein	NCU01056	hypothetical protein	NCU01945	IMP-specific 5'-nucleotidase 1
NCU02124	dienelactone hydrolase	NCU01438	nucleosome assembly protein	NCU01063	hypothetical protein	NCU01946	hypothetical protein
NCU02127	methylcrotonoyl-CoA carboxylase subunit beta	NCU01439	D-3-phosphoglycerate dehydrogenase 1	NCU01064	hypothetical protein	NCU01970	DUF718 domain-containing protein
NCU02130	hypothetical protein	NCU01451	hypothetical protein	NCU01083	S-adenosylmethionine decarboxylase	NCU02003	elongation factor 1 alpha
NCU02133	superoxide dismutase	NCU01452	40S ribosomal protein S1	NCU01092	3-oxoacyl-(acyl-carrier-protein) reductase	NCU02008	hypothetical protein
NCU02181	40S ribosomal protein S4	NCU01459	hypothetical protein	NCU01102	mitochondrial export translocase Oxa1	NCU02009	FreB protein
NCU02193	pyruvate decarboxylase	NCU01483	hypothetical protein	NCU01107	short-chain dehydrogenase	NCU02059	endothiapepsin
NCU02211	hypothetical protein	NCU01487	hypothetical protein	NCU01132	MFS monosaccharide transporter	NCU02074	endoplasmic oxidoreductin-1
NCU02224	26S proteasome non-ATPase regulatory subunit 3	NCU01503	pre-rRNA processing protein Tsr1	NCU01136	hypothetical protein	NCU02075	heat shock protein 70
NCU02238	pantothenate transporter liz1	NCU01504	calcineurin binding protein	NCU01140	NAD(P) transhydrogenase	NCU02084	arginase
NCU02240	endoglucanase II	NCU01510	meiotically up-regulated 190 protein	NCU01145	hypothetical protein	NCU02090	adenine phosphoribosyltransferase
NCU02282	aureobasidin-resistance protein	NCU01517	glucoamylase	NCU01160	ATP-dependent RNA helicase dbp-5	NCU02096	flavohemoglobin
NCU02287	acyl-CoA dehydrogenase	NCU01524	ribosome biogenesis protein BRX1	NCU01163	GAF domain nucleotide-binding protein	NCU02097	short chain dehydrogenase
NCU02289	ubiquitin-conjugating enzyme E2	NCU01528	glyceraldehyde 3-phosphate-dehydrogenase	NCU01179	outer membrane translocase 40 kDa subunit	NCU02098	G/U mismatch-specific DNA glycosylase
NCU02333	arginase	NCU01545	autophagy protein 8	NCU01181	acyl-CoA dehydrogenase family member 11	NCU02099	hypothetical protein
NCU02343	alpha-L-arabinofuranosidase 2	NCU01546	coproporphyrinogen III oxidase	NCU01193	hypothetical protein	NCU02124	dienelactone hydrolase
NCU02344	fungal cellulose binding domain-containing protein	NCU01548	hypothetical protein	NCU01195	Glu/Leu/Phe/Val dehydrogenase	NCU02127	methylcrotonoyl-CoA carboxylase subunit beta
NCU02366	aconitase	NCU01550	adenylate kinase cytosolic	NCU01199	SNARE domain-containing protein	NCU02134	transcription factor
NCU02374	proteasome regulatory particle subunit	NCU01552	ribosomal protein S28	NCU01200	peptidyl-prolyl cis-trans isomerase B	NCU02136	transaldolase
NCU02393	mitogen-activated protein kinase 2	NCU01555	hypothetical protein	NCU01202	hypothetical protein	NCU02139	annexin ANXC4
NCU02397	pyruvate decarboxylase	NCU01565	hypothetical protein	NCU01219	glutaredoxin	NCU02164	hypothetical protein
NCU02435	histone H2B	NCU01589	heat shock protein 60	NCU01221	60S ribosomal protein L16	NCU02175	phosphatidyl inositol-specific phospholipase C
NCU02437	histone H2A	NCU01612	pre-mRNA splicing factor ATP-dependent RNA helicase PRP43	NCU01227	succinyl-CoA ligase alpha-chain	NCU02179	D-lactate dehydrogenase
NCU02455	FKBP-type peptidyl-prolyl cis-trans isomerase	NCU01632	pentafunctional AROM polypeptide	NCU01230	serum paraoxonase/arylesterase	NCU02187	hypothetical protein
NCU02474	outer mitochondrial membrane translocase 5	NCU01634	histone h4	NCU01231	carboxylic acid transporter	NCU02190	oxysterol binding protein
NCU02485	hypothetical protein	NCU01635	histone H3	NCU01233	aldose reductase	NCU02191	hypothetical protein
NCU02500	clock-controlled pheromone CCG-4	NCU01636	2-hydroxychromene-2-carboxylate isomerase	NCU01234	eukaryotic initiation factor 4A-12	NCU02193	pyruvate decarboxylase
NCU02507	hypothetical protein	NCU01638	DNA-directed RNA polymerase I subunit RPA1	NCU01241	mitochondrial carrier protein	NCU02240	endoglucanase II
NCU02509	60S ribosomal protein L11	NCU01654	long-chain-fatty-acid-CoA ligase 1	NCU01250	cystinosin	NCU02244	C2 domain-containing protein
NCU02512	hypothetical protein	NCU01666	acetolactate synthase small subunit	NCU01258	cyanase	NCU02250	ATP synthase subunit ATP9
NCU02513	YjeF domain-containing protein	NCU01680	plasma membrane ATPase	NCU01271	ornithine decarboxylase	NCU02261	hypothetical protein
NCU02515	dipeptidyl aminopeptidase	NCU01689	mitochondrial DNA replication protein YHM2	NCU01282	vacuolar-sorting protein snf-7	NCU02265	period clock protein FRQ
NCU02526	hypothetical protein	NCU01692	mitochondrial citrate synthase	NCU01283	hypothetical protein	NCU02273	vacuolar protease A
NCU02540	meiotic expression up-regulated protein 14	NCU01701	ribitol kinase	NCU01285	hypothetical protein	NCU02287	acyl-CoA dehydrogenase
NCU02576	C6 finger domain-containing protein	NCU01704	NADP:D-xylose dehydrogenase	NCU01289	hypothetical protein	NCU02289	ubiquitin-conjugating enzyme E2
NCU02579	FAS1 domain-containing protein	NCU01728	6-phosphofructo-2-kinase	NCU01290	centromere/microtubule-binding protein CBF5	NCU02296	allantoinase
NCU02596	hypothetical protein	NCU01740	histone H2A.Z-specific chaperone chz-1	NCU01300	imidazoleglycerol-phosphate dehydratase	NCU02307	hypothetical protein
NCU02637	hypothetical protein	NCU01744	glutamate synthase	NCU01312	myb-like DNA-binding protein myb-1	NCU02333	arginase
NCU02690	mitochondrial integral membrane protein	NCU01752	non-anchored cell wall protein 2	NCU01315	UDP-N-acetylglucosaminyltransferase	NCU02343	alpha-L-arabinofuranosidase 2
NCU02707	60S ribosomal protein L6	NCU01754	alcohol dehydrogenase I	NCU01317	60S ribosomal protein L12	NCU02344	fungal cellulose binding domain-containing protein
NCU02713	conidial separation-1	NCU01763	hypothetical protein	NCU01319	hypothetical protein	NCU02356	white collar 1 protein
NCU02744	60S ribosomal protein L9	NCU01776	60S ribosomal protein L15	NCU01320	glutathione S-transferase	NCU02361	formamidase
NCU02765	RNA binding protein	NCU01777	PSP1 domain-containing protein	NCU01328	transketolase	NCU02390	hypothetical protein
NCU02773	hypothetical protein	NCU01781	hypothetical protein	NCU01333	Delta（24（24（1)))-sterol reductase	NCU02397	pyruvate decarboxylase
NCU02797	UTP-glucose-1-phosphate uridylyltransferase	NCU01786	ribose-phosphate pyrophosphokinase II	NCU01347	hypothetical protein	NCU02399	hypothetical protein
NCU02806	14-3-3 family protein 7	NCU01792	heat shock protein 90-associated	NCU01353	mixed-linked glucanase	NCU02400	metacaspase-1B
NCU02807	hypothetical protein	NCU01801	hypothetical protein	NCU01360	NADH:ubiquinone oxidoreductase 11.5kD subunit	NCU02403	ubiquinone biosynthesis protein COQ9
NCU02819	high mobility group protein	NCU01808	cytochrome c	NCU01369	ATP-dependent RNA helicase ded-1	NCU02404	RNP domain-containing protein
NCU02828	condensin complex component cnd2	NCU01813	high affinity glucose transporter	NCU01376	alkaline phosphatase	NCU02424	DnaJ and TPR domain-containing protein
NCU02850	alcohol dehydrogenase	NCU01815	hypothetical protein	NCU01391	hypothetical protein	NCU02435	histone H2B
NCU02855	endo-1,4-beta-xylanase A	NCU01824	UDP-galactopyranose mutase	NCU01395	WSC domain-containing protein	NCU02437	histone H2A
NCU02886	hypothetical protein	NCU01827	60S ribosomal protein L27	NCU01399	short chain dehydrogenase/reductase family protein	NCU02455	FKBP-type peptidyl-prolyl cis-trans isomerase
NCU02890	hypothetical protein	NCU01830	4-hydroxyphenylpyruvate dioxygenase	NCU01402	indoleamine 2,3-dioxygenase	NCU02474	outer mitochondrial membrane translocase 5
NCU02905	60S ribosomal protein L23	NCU01835	hypothetical protein	NCU01418	clock-controlled gene-6	NCU02475	glycine dehydrogenase
NCU02915	hypothetical protein	NCU01839	carboxylesterase	NCU01422	multiprotein-bridging factor 1	NCU02485	hypothetical protein
NCU02916	endoglucanase II	NCU01856	transcriptional activator hac1	NCU01424	DUF636 domain-containing protein	NCU02490	DnaJ domain-containing protein
NCU02929	hypothetical protein	NCU01861	short chain dehydrogenase/reductase family protein	NCU01427	geranylgeranyl pyrophosphate synthetase	NCU02500	clock-controlled pheromone CCG-4
NCU02932	hypothetical protein	NCU01862	SWIRM domain-containing protein FUN19	NCU01428	hydroxyisourate hydrolase	NCU02504	DUF1640 domain-containing protein
NCU02936	proline oxidase	NCU01866	lactonohydrolase	NCU01430	hypothetical protein	NCU02526	hypothetical protein
NCU02948	non-anchored cell wall protein 4	NCU01871	hypothetical protein	NCU01436	questionable protein	NCU02541	oligosaccharyltransferase alpha subunit
NCU02977	DUF887 domain-containing protein	NCU01879	hypothetical protein	NCU01438	nucleosome assembly protein	NCU02549	ubiquinol-cytochrome-c reductase subunit beta
NCU03013	anchored cell wall protein 10	NCU01881	hypothetical protein	NCU01439	D-3-phosphoglycerate dehydrogenase 1	NCU02560	hypothetical protein
NCU03038	40S ribosomal protein S13	NCU01882	purine transporter	NCU01440	myosin-2	NCU02573	FAM96B
NCU03043	C2H2 finger domain-containing protein FlbC	NCU01886	hypothetical protein	NCU01449	GTP cyclohydrolase II	NCU02576	C6 finger domain-containing protein
NCU03050	ARP2/3 complex 34 kDa subunit	NCU01900	xylosidase/arabinosidase	NCU01451	hypothetical protein	NCU02579	FAS1 domain-containing protein
NCU03064	RSC complex subunit Rsc7	NCU01904	2-deoxy-D-gluconate 3-dehydrogenase	NCU01452	40S ribosomal protein S1	NCU02580	fumarate reductase Osm1
NCU03068	glycerol-3-phosphate phosphatase 1	NCU01905	sorbitol dehydrogenase	NCU01453	Rab18/RabC-family small GTPase	NCU02582	RCO3
NCU03076	delta-1-pyrroline-5-carboxylate dehydrogenase	NCU01906	GCY protein	NCU01467	NADH:ubiquinone oxidoreductase 10.4kD subunit	NCU02602	hypothetical protein
NCU03098	glycosyl hydrolase	NCU01924	hypothetical protein	NCU01475	hypothetical protein	NCU02621	C2H2 transcription factor
NCU03102	40S ribosomal protein S11	NCU01940	serine/threonine protein kinase	NCU01483	hypothetical protein	NCU02623	mitochondrial hypoxia responsive domain-containing protein
NCU03118	hypothetical protein	NCU01945	IMP-specific 5'-nucleotidase 1	NCU01487	hypothetical protein	NCU02636	ubiquitin conjugating enzyme
NCU03150	60S ribosomal protein L24	NCU01948	ribosomal protein Srp1	NCU01504	calcineurin binding protein	NCU02644	hypothetical protein
NCU03180	hypothetical protein	NCU01949	40S ribosomal protein S9	NCU01510	meiotically up-regulated 190 protein	NCU02665	diacylglycerol O-acyltransferase
NCU03181	acetylxylan esterase	NCU01955	autophagocytosis protein Aut1	NCU01528	glyceraldehyde 3-phosphate-dehydrogenase	NCU02668	cell wall synthesis protein-Penicillium chrysogenum
NCU03184	C2H2 conidiation transcription factor FlbC	NCU01957	AR2	NCU01545	autophagy protein 8	NCU02681	translocation protein
NCU03222	hypothetical protein	NCU01964	RING-9 protein	NCU01548	hypothetical protein	NCU02704	branched-chain alpha-keto acid dehydrogenase E2 component
NCU03253	hypothetical protein	NCU01966	60S ribosomal protein L37	NCU01550	adenylate kinase cytosolic	NCU02718	hypothetical protein
NCU03302	60S ribosomal protein L36	NCU01968	MFS transporter	NCU01551	hypothetical protein	NCU02730	hypothetical protein
NCU03304	proteasome component PUP3	NCU01977	urea transporter	NCU01552	ribosomal protein S28	NCU02765	RNA binding protein
NCU03322	GDSL family lipase	NCU01985	sulfate adenylyltransferase	NCU01555	hypothetical protein	NCU02773	hypothetical protein
NCU03328	endoglucanase II	NCU01989	hypothetical protein	NCU01560	hypothetical protein	NCU02777	molybdenum cofactor sulfurase
NCU03329	hypothetical protein	NCU01998	septin	NCU01577	hypothetical protein	NCU02807	hypothetical protein
NCU03340	cytochrome-c oxidase chain VIIc	NCU02003	elongation factor 1 alpha	NCU01585	hypothetical protein	NCU02811	hypothetical protein
NCU03370	hypothetical protein	NCU02004	phosphoserine phosphatase	NCU01589	heat shock protein 60	NCU02819	high mobility group protein
NCU03388	stomatin family protein	NCU02005	phosphoadenosine phosphosulfate reductase	NCU01606	ATP synthase subunit 5	NCU02829	phosphomannomutase
NCU03393	ribosome-associated protein	NCU02010	2-isopropylmalate synthase	NCU01611	carnitine acetyl transferase	NCU02853	C2H2 type zinc finger domain-containing protein
NCU03398	hypothetical protein	NCU02027	acyl-protein thioesterase 1	NCU01632	pentafunctional AROM polypeptide	NCU02855	endo-1,4-beta-xylanase A
NCU03415	aldehyde dehydrogenase	NCU02031	hypothetical protein	NCU01634	histone h4	NCU02877	hypothetical protein
NCU03509	amino acid permease NAAP1	NCU02056	salicylaldehyde dehydrogenase	NCU01635	histone H3	NCU02890	hypothetical protein
NCU03515	cell division control protein 10	NCU02064	hypothetical protein	NCU01636	2-hydroxychromene-2-carboxylate isomerase	NCU02915	hypothetical protein
NCU03518	hypothetical protein	NCU02066	ribosome assembly protein Noc2	NCU01638	DNA-directed RNA polymerase I subunit RPA1	NCU02916	endoglucanase II
NCU03523	serine/threonine protein kinase	NCU02075	heat shock protein 70	NCU01640	C2H2 transcription factor	NCU02928	hypothetical protein
NCU03528	DNA polymerase delta subunit 4	NCU02076	eukaryotic translation initiation factor 4E	NCU01646	hypothetical protein	NCU02929	hypothetical protein
NCU03530	anchored cell wall protein 6	NCU02097	short chain dehydrogenase	NCU01649	hypothetical protein	NCU02932	hypothetical protein
NCU03539	ribonucleoside-diphosphate reductase large subunit	NCU02098	G/U mismatch-specific DNA glycosylase	NCU01654	long-chain-fatty-acid-CoA ligase 1	NCU02936	proline oxidase
NCU03559	ubiquinol-cytochrome c reductase complex core protein 2	NCU02124	dienelactone hydrolase	NCU01655	hypothetical protein	NCU02941	hypothetical protein
NCU03593	homeobox domain-containing protein	NCU02126	isovaleryl-CoA dehydrogenase	NCU01666	acetolactate synthase small subunit	NCU02948	non-anchored cell wall protein 4
NCU03600	GTP-binding protein EsdC	NCU02127	methylcrotonoyl-CoA carboxylase subunit beta	NCU01674	alpha-soluble NSF attachment protein	NCU02950	hypothetical protein
NCU03606	replication factor-A protein 1	NCU02128	D-arabinitol dehydrogenase	NCU01680	plasma membrane ATPase	NCU02972	hypothetical protein
NCU03613	hypothetical protein	NCU02130	hypothetical protein	NCU01689	mitochondrial DNA replication protein YHM2	NCU02979	AMP deaminase
NCU03635	60S ribosomal protein L38	NCU02136	transaldolase	NCU01692	mitochondrial citrate synthase	NCU02998	nicotinate-nucleotide pyrophosphorylase
NCU03639	lipase	NCU02139	annexin ANXC4	NCU01701	ribitol kinase	NCU03013	anchored cell wall protein 10
NCU03648	glutaminase A	NCU02181	40S ribosomal protein S4	NCU01704	NADP:D-xylose dehydrogenase	NCU03023	phenol 2-monooxygenase
NCU03686	oxidase assembly protein 2	NCU02184	hypothetical protein	NCU01720	hypothetical protein	NCU03024	GARP complex subunit Vps53
NCU03703	60S ribosomal protein L17	NCU02187	hypothetical protein	NCU01740	histone H2A.Z-specific chaperone chz-1	NCU03026	chitinase
NCU03725	VIB-1	NCU02188	sugar transporter	NCU01748	hypothetical protein	NCU03076	delta-1-pyrroline-5-carboxylate dehydrogenase
NCU03738	40S ribosomal protein S29	NCU02191	hypothetical protein	NCU01752	non-anchored cell wall protein 2	NCU03083	hypothetical protein
NCU03749	hydroxyacylglutathione hydrolase	NCU02193	pyruvate decarboxylase	NCU01754	alcohol dehydrogenase I	NCU03125	NIMA-interacting protein TinC
NCU03753	clock controlled protein CCG-1	NCU02208	eukaryotic translation initiation factor 3	NCU01763	hypothetical protein	NCU03126	hypothetical protein
NCU03757	60S ribosomal protein L4-A	NCU02209	delta-12 fatty acid desaturase	NCU01769	hypothetical protein	NCU03151	peroxisomal membrane protein
NCU03780	hypothetical protein	NCU02211	hypothetical protein	NCU01776	60S ribosomal protein L15	NCU03180	hypothetical protein
NCU03795	cell division control protein 12	NCU02216	cell wall glycosyl hydrolase Dfg5	NCU01786	ribose-phosphate pyrophosphokinase II	NCU03181	acetylxylan esterase
NCU03806	ribosomal protein L27a.e	NCU02235	class I alpha-mannosidase 1A	NCU01788	hypothetical protein	NCU03197	serine/threonine-protein kinase psk1
NCU03813	formate dehydrogenase	NCU02236	hypothetical protein	NCU01789	IDC1 protein	NCU03222	hypothetical protein
NCU03837	Snf1 kinase complex beta-subunit Gal83	NCU02238	pantothenate transporter liz1	NCU01791	SNF7 family protein	NCU03233	hypothetical protein
NCU03860	cAMP-regulated phosphoprotein family protein Igo1	NCU02244	C2 domain-containing protein	NCU01792	heat shock protein 90-associated	NCU03257	ammonium transporter MEP1
NCU03870	hypothetical protein	NCU02250	ATP synthase subunit ATP9	NCU01793	RNA binding domain-containing protein	NCU03283	2-keto-4-pentenoate hydratase
NCU03882	hypothetical protein	NCU02252	phosphoglycerate mutase	NCU01794	hypothetical protein	NCU03293	hypothetical protein
NCU03886	PH domain-containing protein	NCU02261	hypothetical protein	NCU01797	serine/threonine-protein kinase nrc-2	NCU03313	hypothetical protein
NCU03905	hypothetical protein	NCU02269	mitochondrial carnitine/acylcarnitine carrier protein	NCU01801	hypothetical protein	NCU03318	hypothetical protein
NCU03910	microsomal cytochrome b5	NCU02273	vacuolar protease A	NCU01808	cytochrome c	NCU03319	COPII-coated vesicle protein SurF4/Erv29
NCU03911	F-actin-capping protein subunit alpha	NCU02274	serine hydroxymethyltransferase	NCU01813	high affinity glucose transporter	NCU03322	GDSL family lipase
NCU03953	mitochondrial NADH-ubiquinone oxidoreductase 20 kDa subunit	NCU02287	acyl-CoA dehydrogenase	NCU01815	hypothetical protein	NCU03328	endoglucanase II
NCU03967	vivid PAS protein VVD	NCU02305	decaprenyl-diphosphate synthase subunit 1	NCU01816	allantoicase	NCU03329	hypothetical protein
NCU03979	biotin synthase	NCU02307	hypothetical protein	NCU01820	exportin-1	NCU03333	tyrosine phosphatase
NCU03982	glucose-regulated protein	NCU02319	aminopeptidase	NCU01824	UDP-galactopyranose mutase	NCU03350	xanthine dehydrogenase
NCU03988	60S ribosomal protein L18	NCU02325	GMP synthase	NCU01826	DUF250 domain membrane protein	NCU03364	DENN domain-containing protein
NCU04054	tubulin beta chain	NCU02333	arginase	NCU01827	60S ribosomal protein L27	NCU03370	hypothetical protein
NCU04078	NAD-dependent methanol dehydrogenase	NCU02343	alpha-L-arabinofuranosidase 2	NCU01830	4-hydroxyphenylpyruvate dioxygenase	NCU03383	hypothetical protein
NCU04140	peptidyl-prolyl cis-trans isomerase fkr-2	NCU02360	transmembrane protein UsgS	NCU01839	carboxylesterase	NCU03388	stomatin family protein
NCU04142	heat shock protein 80	NCU02381	phosphatidylserine synthase	NCU01856	transcriptional activator hac1	NCU03408	hypothetical protein
NCU04167	hypothetical protein	NCU02397	pyruvate decarboxylase	NCU01866	lactonohydrolase	NCU03492	inositolphosphorylceramide-B C-26 hydroxylase
NCU04168	hypothetical protein	NCU02398	hypothetical protein	NCU01868	MFS maltose permease MalP	NCU03497	plasma membrane iron permease
NCU04169	hypothetical protein	NCU02422	ATG9 protein	NCU01871	hypothetical protein	NCU03498	Lcc3
NCU04170	hypothetical protein	NCU02423	mitoferrin-1	NCU01873	hypothetical protein	NCU03506	hypothetical protein
NCU04192	vacuolar aspartyl aminopeptidase Lap4	NCU02430	cystathionine gamma-synthase	NCU01879	hypothetical protein	NCU03509	amino acid permease NAAP1
NCU04202	nucleoside diphosphate kinase	NCU02435	histone H2B	NCU01881	hypothetical protein	NCU03518	hypothetical protein
NCU04249	hypothetical protein	NCU02437	histone H2A	NCU01886	hypothetical protein	NCU03523	serine/threonine protein kinase
NCU04266	hypothetical protein	NCU02450	threonine dehydratase	NCU01897	hypothetical protein	NCU03530	anchored cell wall protein 6
NCU04276	hypothetical protein	NCU02452	TLDc domain-containing protein 2	NCU01900	xylosidase/arabinosidase	NCU03536	regulatory protein Cys-3
NCU04288	Poly（A)+ RNA export protein	NCU02453	hypothetical protein	NCU01903	pigment biosynthesis protein Ayg1	NCU03556	peroxisomal membrane protein Pmp47
NCU04304	outer mitochondrial membrane protein porin	NCU02459	DUF52 domain-containing protein	NCU01904	2-deoxy-D-gluconate 3-dehydrogenase	NCU03558	hypothetical protein
NCU04314	hypothetical protein	NCU02463	bax Inhibitor family protein	NCU01905	sorbitol dehydrogenase	NCU03569	hypothetical protein
NCU04331	60s ribosomal protein l5	NCU02464	neuronal-specific septin-3	NCU01906	GCY protein	NCU03593	homeobox domain-containing protein
NCU04343	DUF323 domain-containing protein	NCU02468	longevity-assurance protein	NCU01911	GDP/GTP exchange factor Sec2p	NCU03600	GTP-binding protein EsdC
NCU04370	ubiquitin-activating enzyme E1 1	NCU02477	ribosome biogenesis protein Sqt1	NCU01922	hypothetical protein	NCU03635	60S ribosomal protein L38
NCU04371	peptidyl-prolyl cis-trans isomerase fkr-3	NCU02492	hypothetical protein	NCU01924	hypothetical protein	NCU03637	CaaX prenyl protease Ste24
NCU04373	hypothetical protein	NCU02500	clock-controlled pheromone CCG-4	NCU01938	hypothetical protein	NCU03643	cutinase transcription factor 1 beta
NCU04387	vacuolar membrane ATPase 7	NCU02505	pyruvate carboxylase	NCU01939	nonsense-mediated mRNA decay protein	NCU03648	glutaminase A
NCU04400	hypothetical protein	NCU02509	60S ribosomal protein L11	NCU01945	IMP-specific 5'-nucleotidase 1	NCU03651	NADP-dependent malic enzyme
NCU04401	fructose-bisphosphate aldolase	NCU02514	mitochondrial ATP synthase alpha subunit	NCU01946	hypothetical protein	NCU03684	hypothetical protein
NCU04405	mago nashi protein	NCU02515	dipeptidyl aminopeptidase	NCU01948	ribosomal protein Srp1	NCU03686	oxidase assembly protein 2
NCU04415	hypothetical protein	NCU02522	hypothetical protein	NCU01949	40S ribosomal protein S9	NCU03697	FAD binding domain-containing protein
NCU04430	leupeptin-inactivating enzyme 1	NCU02526	hypothetical protein	NCU01953	AMI1 protein	NCU03699	zinc finger containing protein
NCU04456	hypothetical protein	NCU02533	DNA-directed RNA polymerase I and III polypeptide	NCU01955	autophagocytosis protein Aut1	NCU03725	VIB-1
NCU04475	lipase B	NCU02534	NADH:ubiquinone oxidoreductase 49kD subunit	NCU01957	AR2	NCU03728	hypothetical protein
NCU04479	LAP2	NCU02540	meiotic expression up-regulated protein 14	NCU01964	RING-9 protein	NCU03730	tRNA '-O-ribosylphosphate transferase
NCU04502	hypothetical protein	NCU02544	ABC transporter	NCU01966	60S ribosomal protein L37	NCU03739	protein disulfide-isomerase tigA
NCU04510	aldose reductase	NCU02546	nucleolar GTP-binding protein 2	NCU01968	MFS transporter	NCU03749	hydroxyacylglutathione hydrolase
NCU04521	hypothetical protein	NCU02549	ubiquinol-cytochrome-c reductase subunit beta	NCU01970	DUF718 domain-containing protein	NCU03753	clock controlled protein CCG-1
NCU04522	hypothetical protein	NCU02560	hypothetical protein	NCU01972	hypothetical protein	NCU03761	hypothetical protein
NCU04525	hypothetical protein	NCU02566	alanyl-tRNA synthetase	NCU01977	urea transporter	NCU03813	formate dehydrogenase
NCU04542	hypothetical protein	NCU02571	acetyl-CoA acetyltransferase	NCU01985	sulfate adenylyltransferase	NCU03873	hypothetical protein
NCU04543	hypothetical protein	NCU02579	FAS1 domain-containing protein	NCU01989	hypothetical protein	NCU03893	short-chain dehydrogenase/reductase SDR
NCU04552	40S ribosomal protein S26E	NCU02580	fumarate reductase Osm1	NCU01994	bZIP transcription factor	NCU03897	RNA binding effector protein Scp160
NCU04553	ubiquitin/ribosomal protein S27a	NCU02596	hypothetical protein	NCU01998	septin	NCU03903	lipase/esterase
NCU04605	hypothetical protein	NCU02623	mitochondrial hypoxia responsive domain-containing protein	NCU02003	elongation factor 1 alpha	NCU03910	microsomal cytochrome b5
NCU04655	hypothetical protein	NCU02624	cytochrome P450 51	NCU02004	phosphoserine phosphatase	NCU03913	2-oxoisovalerate dehydrogenase beta subunit
NCU04674	alpha-glucosidase	NCU02627	hypothetical protein	NCU02005	phosphoadenosine phosphosulfate reductase	NCU03967	vivid PAS protein VVD
NCU04698	spermine/spermidine synthase	NCU02629	bifunctional purine biosynthesis protein	NCU02010	2-isopropylmalate synthase	NCU03982	glucose-regulated protein
NCU04699	methylene-fatty-acyl-phospholipid synthase	NCU02639	argininosuccinate synthase	NCU02011	importin subunit beta-1	NCU04005	casein kinase 1b
NCU04720	nitrite reductase	NCU02657	s-adenosylmethionine synthetase	NCU02018	short chain dehydrogenase	NCU04013	aldehyde dehydrogenase
NCU04770	TATA-binding protein	NCU02665	diacylglycerol O-acyltransferase	NCU02020	metalloreductase transmembrane component	NCU04034	hypothetical protein
NCU04779	60S ribosomal protein L8	NCU02668	cell wall synthesis protein-Penicillium chrysogenum	NCU02027	acyl-protein thioesterase 1	NCU04127	hypothetical protein
NCU04791	short chain dehydrogenase/reductase	NCU02671	cutinase G-box binding protein	NCU02031	hypothetical protein	NCU04130	acylase ACY 1
NCU04797	fructose-1,6-bisphosphatase	NCU02677	carbamoyl-phosphate synthase large subunit	NCU02056	salicylaldehyde dehydrogenase	NCU04169	hypothetical protein
NCU04815	lactoylglutathione lyase	NCU02690	mitochondrial integral membrane protein	NCU02074	endoplasmic oxidoreductin-1	NCU04193	hypothetical protein
NCU04843	hypothetical protein	NCU02701	dipeptidyl peptidase	NCU02075	heat shock protein 70	NCU04197	CipC protein
NCU04854	endoglucanase EG-1	NCU02704	branched-chain alpha-keto acid dehydrogenase E2 component	NCU02080	hypothetical protein	NCU04202	nucleoside diphosphate kinase
NCU04856	glutamine synthetase	NCU02707	60S ribosomal protein L6	NCU02086	hypothetical protein	NCU04203	glucosidase II alpha subunit
NCU04870	acetyl xylan esterase	NCU02713	conidial separation-1	NCU02090	adenine phosphoribosyltransferase	NCU04230	isocitrate lyase
NCU04904	hypothetical protein	NCU02718	hypothetical protein	NCU02094	VAD-2	NCU04249	hypothetical protein
NCU04905	hypothetical protein	NCU02724	HLH transcription factor	NCU02096	flavohemoglobin	NCU04266	hypothetical protein
NCU04908	hypothetical protein	NCU02739	transcription factor RfeD	NCU02097	short chain dehydrogenase	NCU04268	hypothetical protein
NCU04932	hypothetical protein	NCU02744	60S ribosomal protein L9	NCU02100	LMBR1 domain-containing protein 1	NCU04274	nuclear envelope protein Cut8
NCU04946	hypothetical protein	NCU02761	hypothetical protein	NCU02124	dienelactone hydrolase	NCU04276	hypothetical protein
NCU04952	beta-D-glucoside glucohydrolase	NCU02765	RNA binding protein	NCU02126	isovaleryl-CoA dehydrogenase	NCU04283	hypothetical protein
NCU04997	xylanase	NCU02767	PRO41 protein	NCU02127	methylcrotonoyl-CoA carboxylase subunit beta	NCU04284	hypothetical protein
NCU05005	HHE domain-containing protein	NCU02773	hypothetical protein	NCU02128	D-arabinitol dehydrogenase	NCU04287	hypothetical protein
NCU05013	hypothetical protein	NCU02777	molybdenum cofactor sulfurase	NCU02130	hypothetical protein	NCU04293	COPII-coated vesicle protein
NCU05023	hypothetical protein	NCU02784	hypothetical protein	NCU02133	superoxide dismutase	NCU04307	MSF1
NCU05032	60S ribosomal protein L40	NCU02785	phospho-2-dehydro-3-deoxyheptonate aldolase	NCU02134	transcription factor	NCU04314	hypothetical protein
NCU05046	calcium-transporting ATPase 3	NCU02800	arsenite resistance protein Ars2	NCU02136	transaldolase	NCU04340	acetyltransferase
NCU05057	endoglucanase EG-1	NCU02807	hypothetical protein	NCU02139	annexin ANXC4	NCU04342	hypothetical protein
NCU05066	hypothetical protein	NCU02810	eukaryotic translation initiation factor 2 gamma subunit	NCU02156	dsDNA-binding protein PDCD5	NCU04343	DUF323 domain-containing protein
NCU05069	FAD dependent oxidoreductase	NCU02813	eukaryotic translation initiation factor 3 subunit M	NCU02164	hypothetical protein	NCU04371	peptidyl-prolyl cis-trans isomerase fkr-3
NCU05079	MFS peptide transporter	NCU02850	alcohol dehydrogenase	NCU02175	phosphatidyl inositol-specific phospholipase C	NCU04373	hypothetical protein
NCU05121	endoglucanase V	NCU02877	hypothetical protein	NCU02181	40S ribosomal protein S4	NCU04388	phosphatidylglycerol/phosphatidylinositol transfer protein
NCU05133	udp-glucose 4-epimerase	NCU02890	hypothetical protein	NCU02184	hypothetical protein	NCU04400	hypothetical protein
NCU05134	hypothetical protein	NCU02899	hypothetical protein	NCU02187	hypothetical protein	NCU04401	fructose-bisphosphate aldolase
NCU05137	non-anchored cell wall protein 1	NCU02905	60S ribosomal protein L23	NCU02188	sugar transporter	NCU04421	annexin XIV
NCU05141	hypothetical protein	NCU02928	hypothetical protein	NCU02190	oxysterol binding protein	NCU04430	leupeptin-inactivating enzyme 1
NCU05159	acetylxylan esterase	NCU02929	hypothetical protein	NCU02193	pyruvate decarboxylase	NCU04433	sulfate permease II
NCU05164	short chain dehydrogenase/reductase SDR	NCU02932	hypothetical protein	NCU02208	eukaryotic translation initiation factor 3	NCU04452	12-oxophytodienoate reductase 1
NCU05165	pyridoxamine phosphate oxidase	NCU02936	proline oxidase	NCU02209	delta-12 fatty acid desaturase	NCU04475	lipase B
NCU05170	hypothetical protein	NCU02941	hypothetical protein	NCU02238	pantothenate transporter liz1	NCU04493	hypothetical protein
NCU05204	Cullin 1	NCU02942	hypothetical protein	NCU02250	ATP synthase subunit ATP9	NCU04501	hypothetical protein
NCU05227	20S proteasome maturation protein Ump1	NCU02948	non-anchored cell wall protein 4	NCU02252	phosphoglycerate mutase	NCU04502	hypothetical protein
NCU05260	protein kinase domain-containing protein	NCU02954	homoisocitrate dehydrogenase	NCU02261	hypothetical protein	NCU04519	microsomal signal peptidase 18 kDa subunit
NCU05274	initiation factor 5a	NCU02977	DUF887 domain-containing protein	NCU02265	period clock protein FRQ	NCU04521	hypothetical protein
NCU05288	rab GDP-dissociation inhibitor	NCU02979	AMP deaminase	NCU02273	vacuolar protease A	NCU04522	hypothetical protein
NCU05338	hypothetical protein	NCU02998	nicotinate-nucleotide pyrophosphorylase	NCU02274	serine hydroxymethyltransferase	NCU04533	DUF1881 domain-containing protein
NCU05350	hypothetical protein	NCU03004	pyruvate dehydrogenase E1 component	NCU02287	acyl-CoA dehydrogenase	NCU04542	hypothetical protein
NCU05394	MFS transporter	NCU03006	sterol 24-C-methyltransferase	NCU02294	hypothetical protein	NCU04569	5-oxoprolinase
NCU05395	hypothetical protein	NCU03009	zuotin	NCU02296	allantoinase	NCU04591	pentachlorophenol monooxygenase
NCU05404	endoglucanase	NCU03010	L-aminoadipate-semialdehyde dehydrogenase large subunit	NCU02305	decaprenyl-diphosphate synthase subunit 1	NCU04596	gamma-cysteine synthetase regulatory subunit
NCU05425	2-oxoglutarate dehydrogenase E1 component	NCU03013	anchored cell wall protein 10	NCU02307	hypothetical protein	NCU04605	hypothetical protein
NCU05427	ATP-dependent Clp protease	NCU03038	40S ribosomal protein S13	NCU02319	aminopeptidase	NCU04635	hypothetical protein
NCU05429	1,4-alpha-glucan branching enzyme	NCU03061	translation initiation factor RLI1	NCU02333	arginase	NCU04698	spermine/spermidine synthase
NCU05490	hypothetical protein	NCU03064	RSC complex subunit Rsc7	NCU02335	short chain dehydrogenase	NCU04720	nitrite reductase
NCU05495	CVNH domain-containing protein	NCU03066	GTP-binding protein	NCU02342	hypothetical protein	NCU04732	hypothetical protein
NCU05498	hypothetical protein	NCU03076	delta-1-pyrroline-5-carboxylate dehydrogenase	NCU02343	alpha-L-arabinofuranosidase 2	NCU04771	fructosyl-amino acid oxidase
NCU05501	hypothetical protein	NCU03091	hypothetical protein	NCU02353	hypothetical protein	NCU04796	3-ketoacyl-CoA thiolase
NCU05512	copper resistance protein Crd2	NCU03092	nuclear localization sequence binding protein	NCU02356	white collar 1 protein	NCU04797	fructose-1,6-bisphosphatase
NCU05537	fumarylacetoacetase	NCU03097	nucleotide-sugar transporter	NCU02360	transmembrane protein UsgS	NCU04802	peroxisomal biogenesis factor
NCU05548	phospho-2-dehydro-3-deoxyheptonate aldolase	NCU03100	6-phosphogluconate dehydrogenase	NCU02364	C2H2 finger domain-containing protein	NCU04803	2-nitropropane dioxygenase family oxidoreductase
NCU05554	60S ribosomal protein L13	NCU03102	40S ribosomal protein S11	NCU02366	aconitase	NCU04805	hypothetical protein
NCU05574	hypothetical protein	NCU03108	glutamate carboxypeptidase	NCU02380	threonyl-tRNA synthetase	NCU04809	MFS phospholipid transporter
NCU05598	rhamnogalacturonase B	NCU03117	inosine-5'-monophosphate dehydrogenase IMD2	NCU02390	hypothetical protein	NCU04815	lactoylglutathione lyase
NCU05599	40S ribosomal protein S28	NCU03118	hypothetical protein	NCU02393	mitogen-activated protein kinase 2	NCU04847	cyclin
NCU05663	hypothetical protein	NCU03125	NIMA-interacting protein TinC	NCU02397	pyruvate decarboxylase	NCU04848	hypothetical protein
NCU05712	hypothetical protein	NCU03141	lysophospholipase	NCU02398	hypothetical protein	NCU04854	endoglucanase EG-1
NCU05751	cellulose-binding protein	NCU03148	nascent polypeptide-associated complex beta subunit	NCU02399	hypothetical protein	NCU04856	glutamine synthetase
NCU05770	peroxidase/catalase 2	NCU03150	60S ribosomal protein L24	NCU02400	metacaspase-1B	NCU04866	ADA-6
NCU05780	glutathione transferase	NCU03171	small oligopeptide transporter	NCU02403	ubiquinone biosynthesis protein COQ9	NCU04870	acetyl xylan esterase
NCU05791	SOM1 protein	NCU03184	C2H2 conidiation transcription factor FlbC	NCU02404	RNP domain-containing protein	NCU04904	hypothetical protein
NCU05800	zinc knuckle domain-containing protein	NCU03192	hypothetical protein	NCU02410	hypothetical protein	NCU04905	hypothetical protein
NCU05810	guanine nucleotide-binding protein subunit beta-like protein	NCU03199	ATP synthase subunit H	NCU02422	ATG9 protein	NCU04908	hypothetical protein
NCU05822	hypothetical protein	NCU03222	hypothetical protein	NCU02423	mitoferrin-1	NCU04909	hypothetical protein
NCU05832	hypothetical protein	NCU03241	FK506-binding protein 4	NCU02430	cystathionine gamma-synthase	NCU04910	hypothetical protein
NCU05841	UMTA	NCU03253	hypothetical protein	NCU02435	histone H2B	NCU04914	hypothetical protein
NCU05846	hypothetical protein	NCU03257	ammonium transporter MEP1	NCU02437	histone H2A	NCU04923	Gld1
NCU05853	MFS sugar transporter	NCU03263	transmembrane protein	NCU02450	threonine dehydratase	NCU04924	HAD-superfamily hydrolase
NCU05863	hypothetical protein	NCU03280	NUDIX domain-containing protein	NCU02452	TLDc domain-containing protein 2	NCU04951	hypothetical protein
NCU05864	hypothetical protein	NCU03283	2-keto-4-pentenoate hydratase	NCU02455	FKBP-type peptidyl-prolyl cis-trans isomerase	NCU04963	high-affinity glucose transporter
NCU05881	DUF500 and UBA/TS-N domain-containing protein	NCU03290	dipeptidyl peptidase	NCU02459	DUF52 domain-containing protein	NCU04997	xylanase
NCU05897	l-fucose permease	NCU03293	hypothetical protein	NCU02463	bax Inhibitor family protein	NCU05005	HHE domain-containing protein
NCU05906	hypothetical protein	NCU03295	4-coumarate-CoA ligase 1	NCU02464	neuronal-specific septin-3	NCU05006	cytochrome P450
NCU05924	endo-1,4-beta-xylanase	NCU03297	cytochrome c peroxidase	NCU02468	longevity-assurance protein	NCU05032	60S ribosomal protein L40
NCU05942	proteasome component Y13	NCU03302	60S ribosomal protein L36	NCU02475	glycine dehydrogenase	NCU05038	2OG-Fe(II) oxygenase
NCU05955	Cel74a	NCU03316	pH-response regulator protein palC	NCU02477	ribosome biogenesis protein Sqt1	NCU05046	calcium-transporting ATPase 3
NCU05956	beta-galactosidase	NCU03321	eukaryotic ribosome biogenesis protein 1	NCU02480	short-chain dehydrogenase/reductase	NCU05057	endoglucanase EG-1
NCU05970	hypothetical protein	NCU03322	GDSL family lipase	NCU02491	DNAJ domain-containing protein	NCU05068	hypothetical protein
NCU05977	dihydrodipicolinate synthase	NCU03323	hypothetical protein	NCU02492	hypothetical protein	NCU05069	FAD dependent oxidoreductase
NCU05980	carboxypeptidase S1	NCU03340	cytochrome-c oxidase chain VIIc	NCU02500	clock-controlled pheromone CCG-4	NCU05079	MFS peptide transporter
NCU05989	hypothetical protein	NCU03347	kynurenine-oxoglutarate transaminase 1	NCU02505	pyruvate carboxylase	NCU05133	udp-glucose 4-epimerase
NCU05995	ubiquitin	NCU03350	xanthine dehydrogenase	NCU02509	60S ribosomal protein L11	NCU05134	hypothetical protein
NCU06005	glycerol kinase	NCU03364	DENN domain-containing protein	NCU02510	clathrin heavy chain	NCU05136	endo alpha-1,4 polygalactosaminidase precusor
NCU06031	mitochondrial peroxiredoxin PRX1	NCU03370	hypothetical protein	NCU02512	hypothetical protein	NCU05137	non-anchored cell wall protein 1
NCU06032	long-chain fatty acid transporter	NCU03372	nonspecific lipid-transfer protein	NCU02514	mitochondrial ATP synthase alpha subunit	NCU05141	hypothetical protein
NCU06035	elongation factor 1-beta	NCU03388	stomatin family protein	NCU02520	thioredoxin	NCU05156	hypothetical protein
NCU06047	40S ribosomal protein S2	NCU03393	ribosome-associated protein	NCU02522	hypothetical protein	NCU05159	acetylxylan esterase
NCU06079	hypothetical protein	NCU03396	nucleolar protein nop-58	NCU02526	hypothetical protein	NCU05162	hypothetical protein
NCU06110	thiazole biosynthetic enzyme	NCU03398	hypothetical protein	NCU02540	meiotic expression up-regulated protein 14	NCU05188	FAD monooxygenase
NCU06125	hypothetical protein	NCU03415	aldehyde dehydrogenase	NCU02544	ABC transporter	NCU05278	cytochrome P450 61
NCU06138	quinate permease	NCU03425	threonine synthase	NCU02552	RING-8 protein	NCU05309	Cut9 interacting protein Scn1
NCU06143	hypothetical protein	NCU03426	pps1 dual specificty phosphatase	NCU02560	hypothetical protein	NCU05311	hypothetical protein
NCU06185	ACW-9	NCU03462	leucine Rich Repeat domain-containing protein	NCU02566	alanyl-tRNA synthetase	NCU05338	hypothetical protein
NCU06210	hypothetical protein	NCU03471	DUF6 domain-containing protein	NCU02576	C6 finger domain-containing protein	NCU05350	hypothetical protein
NCU06211	malate dehydrogenase	NCU03492	inositolphosphorylceramide-B C-26 hydroxylase	NCU02579	FAS1 domain-containing protein	NCU05381	hypothetical protein
NCU06214	hypothetical protein	NCU03500	aminotransferase	NCU02580	fumarate reductase Osm1	NCU05387	hydrolase
NCU06226	60S ribosomal protein L25	NCU03509	amino acid permease NAAP1	NCU02582	RCO3	NCU05390	mitochondrial phosphate carrier protein
NCU06251	KH domain RNA-binding protein	NCU03515	cell division control protein 10	NCU02590	hypothetical protein	NCU05395	hypothetical protein
NCU06255	hypothetical protein	NCU03518	hypothetical protein	NCU02591	glycerol:H+ symporter	NCU05404	endoglucanase
NCU06261	uracil phosphoribosyltransferase	NCU03523	serine/threonine protein kinase	NCU02599	BAP31 domain-containing protein	NCU05414	hypothetical protein
NCU06265	hypothetical protein	NCU03530	anchored cell wall protein 6	NCU02606	hypothetical protein	NCU05425	2-oxoglutarate dehydrogenase E1 component
NCU06333	translocation protein SEC62	NCU03539	ribonucleoside-diphosphate reductase large subunit	NCU02608	hypothetical protein	NCU05435	hypothetical protein
NCU06354	small nuclear ribonucleoprotein E	NCU03542	enoyl-CoA hydratase/isomerase	NCU02610	dynein light chain type 1	NCU05488	RNA-binding protein Vip1
NCU06358	high affinity glucose transporter RGT2	NCU03556	peroxisomal membrane protein Pmp47	NCU02616	WD-repeat containing protein slp1	NCU05490	hypothetical protein
NCU06364	GDSL lipase/acylhydrolase	NCU03559	ubiquinol-cytochrome c reductase complex core protein 2	NCU02624	cytochrome P450 51	NCU05493	hypothetical protein
NCU06380	zinc transporter YKE4	NCU03561	mitochondrial carrier protein	NCU02627	hypothetical protein	NCU05495	CVNH domain-containing protein
NCU06383	UPF0075 domain-containing protein	NCU03565	ribosomal protein L26	NCU02629	bifunctional purine biosynthesis protein	NCU05498	hypothetical protein
NCU06431	40S ribosomal protein S22	NCU03569	hypothetical protein	NCU02636	ubiquitin conjugating enzyme	NCU05499	homogentisate 1,2-dioxygenase
NCU06432	40S ribosomal protein S12	NCU03600	GTP-binding protein EsdC	NCU02639	argininosuccinate synthase	NCU05501	hypothetical protein
NCU06448	enoyl-CoA hydratase	NCU03603	cytochrome b5	NCU02657	s-adenosylmethionine synthetase	NCU05512	copper resistance protein Crd2
NCU06490	hypothetical protein	NCU03608	ketol-acid reductoisomerase	NCU02660	DUF962 domain-containing protein	NCU05519	MFS transporter
NCU06506	hypothetical protein	NCU03635	60S ribosomal protein L38	NCU02665	diacylglycerol O-acyltransferase	NCU05524	hypothetical protein
NCU06556	thioredoxin II	NCU03636	hypothetical protein	NCU02668	cell wall synthesis protein-Penicillium chrysogenum	NCU05525	DUF833 domain-containing protein
NCU06561	rho-gdp dissociation inhibitor	NCU03639	lipase	NCU02671	cutinase G-box binding protein	NCU05526	homocitrate synthase
NCU06597	hypothetical protein	NCU03648	glutaminase A	NCU02677	carbamoyl-phosphate synthase large subunit	NCU05537	fumarylacetoacetase
NCU06606	ubiquinol-cytochrome c reductase iron-sulfur subunit	NCU03669	AdoMet-dependent rRNA methyltransferase spb1	NCU02679	carboxylesterase	NCU05542	xanthine phosphoribosyltransferase 1
NCU06607	hypothetical protein	NCU03678	ssh-4	NCU02690	mitochondrial integral membrane protein	NCU05548	phospho-2-dehydro-3-deoxyheptonate aldolase
NCU06646	RNA polymerase II transcription factor B subunit 5	NCU03684	hypothetical protein	NCU02701	dipeptidyl peptidase	NCU05560	hypothetical protein
NCU06652	S-(hydroxymethyl)glutathione dehydrogenase	NCU03686	oxidase assembly protein 2	NCU02704	branched-chain alpha-keto acid dehydrogenase E2 component	NCU05561	copper metallothionein
NCU06656	transcriptional activator protein acu-15	NCU03702	rRNA 2'-O-methyltransferase fibrillarin	NCU02707	60S ribosomal protein L6	NCU05574	hypothetical protein
NCU06660	plasma membrane proteolipid 3	NCU03703	60S ribosomal protein L17	NCU02718	hypothetical protein	NCU05585	MFS quinate transporter
NCU06679	histone acetyltransferase type B subunit 2	NCU03713	guanosine-diphosphatase	NCU02719	hypothetical protein	NCU05591	ABC transporter CDR4
NCU06695	cytochrome c oxidase polypeptide VI	NCU03735	hypothetical protein	NCU02720	hypothetical protein	NCU05593	mitochondrial outer membrane beta-barrel protein Tob55
NCU06724	glutamine synthetase	NCU03737	elongation factor Tu	NCU02723	SFT2 domain-containing protein	NCU05594	L-galactose dehydrogenase
NCU06743	hypothetical protein	NCU03738	40S ribosomal protein S29	NCU02724	HLH transcription factor	NCU05598	rhamnogalacturonase B
NCU06781	1,3-beta-glucanosyltransferase Gel2	NCU03748	saccharopine dehydrogenase	NCU02732	hypothetical protein	NCU05639	hypothetical protein
NCU06803	glutamate decarboxylase	NCU03753	clock controlled protein CCG-1	NCU02733	golgi apparatus membrane protein tvp-23	NCU05694	hypothetical protein
NCU06843	60S ribosomal protein L3	NCU03757	60S ribosomal protein L4-A	NCU02736	hypothetical protein	NCU05751	cellulose-binding protein
NCU06863	histone H1	NCU03761	hypothetical protein	NCU02739	transcription factor RfeD	NCU05755	hypothetical protein
NCU06890	hypothetical protein	NCU03779	dihydroxyacetone kinase 1	NCU02744	60S ribosomal protein L9	NCU05756	peptidase M4
NCU06892	40S ribosomal protein S20	NCU03780	hypothetical protein	NCU02745	hypothetical protein	NCU05770	peroxidase/catalase 2
NCU06895	cytochrome P450 4A5	NCU03791	hypothetical protein	NCU02746	vacuolar ATPase subunit H	NCU05804	60S ribosomal protein L19
NCU06948	efhand domain-containing protein	NCU03802	trimethyllysine dioxygenase	NCU02755	PAP2 domain-containing protein	NCU05805	serine hydroxymethyltransferase
NCU06961	exopolygalacturonase	NCU03806	ribosomal protein L27a.e	NCU02765	RNA binding protein	NCU05826	hypothetical protein
NCU06966	hypothetical protein	NCU03813	formate dehydrogenase	NCU02767	PRO41 protein	NCU05832	hypothetical protein
NCU06971	transcriptional activator xlnR	NCU03826	elongation factor 1-gamma	NCU02773	hypothetical protein	NCU05846	hypothetical protein
NCU06977	hypothetical protein	NCU03857	hypothetical protein	NCU02777	molybdenum cofactor sulfurase	NCU05852	glucuronan lyase A
NCU06983	hypothetical protein	NCU03860	cAMP-regulated phosphoprotein family protein Igo1	NCU02784	hypothetical protein	NCU05853	MFS sugar transporter
NCU06986	DUF221 domain-containing protein	NCU03870	hypothetical protein	NCU02785	phospho-2-dehydro-3-deoxyheptonate aldolase	NCU05863	hypothetical protein
NCU07024	mitogen-activated protein kinase	NCU03873	hypothetical protein	NCU02797	UTP-glucose-1-phosphate uridylyltransferase	NCU05864	hypothetical protein
NCU07027	glycogen phosphorylase	NCU03876	eukaryotic translation initiation factor 3 subunit 2	NCU02801	translocator protein	NCU05881	DUF500 and UBA/TS-N domain-containing protein
NCU07055	monooxygenase	NCU03910	microsomal cytochrome b5	NCU02802	mitochondrial ornithine carrier protein	NCU05897	l-fucose permease
NCU07067	mannosyl-oligosaccharide alpha-1,2-mannosidase	NCU03913	2-oxoisovalerate dehydrogenase beta subunit	NCU02806	14-3-3 family protein 7	NCU05899	flotillin domain-containing protein
NCU07068	K(+)/H（+) antiporter 1	NCU03922	hydroxymethylglutaryl-CoA synthase	NCU02807	hypothetical protein	NCU05900	hypothetical protein
NCU07082	aspartyl-tRNA synthetase	NCU03935	homoserine dehydrogenase	NCU02810	eukaryotic translation initiation factor 2 gamma subunit	NCU05922	hypothetical protein
NCU07095	hypothetical protein	NCU03963	5'-methylthioadenosine phosphorylase	NCU02811	hypothetical protein	NCU05924	endo-1,4-beta-xylanase
NCU07120	DUF1264 domain-containing protein	NCU03967	vivid PAS protein VVD	NCU02813	eukaryotic translation initiation factor 3 subunit M	NCU05955	Cel74a
NCU07143	6-phosphogluconolactonase	NCU03988	60S ribosomal protein L18	NCU02819	high mobility group protein	NCU05956	beta-galactosidase
NCU07153	glutamate carboxypeptidase	NCU03990	hypothetical protein	NCU02829	phosphomannomutase	NCU05970	hypothetical protein
NCU07167	isoflavone reductase	NCU03995	oligosaccharyl transferase subunit	NCU02850	alcohol dehydrogenase	NCU05985	glycerol-3-phosphate O-acyltransferase
NCU07173	ADP-ribosylation factor 6	NCU04013	aldehyde dehydrogenase	NCU02854	hypothetical protein	NCU05989	hypothetical protein
NCU07190	exoglucanase 3	NCU04019	nicotinamide mononucleotide adenylyl transferase	NCU02877	hypothetical protein	NCU05994	transcription factor TamA
NCU07192	hypothetical protein	NCU04020	lysyl-tRNA synthetase	NCU02890	hypothetical protein	NCU05995	ubiquitin
NCU07200	metalloprotease 1	NCU04047	hypothetical protein	NCU02905	60S ribosomal protein L23	NCU06001	hypothetical protein
NCU07222	hypothetical protein	NCU04049	hypothetical protein	NCU02913	DNA repair protein rad5	NCU06005	glycerol kinase
NCU07224	monooxygenase	NCU04050	cross-pathway control protein 1	NCU02928	hypothetical protein	NCU06031	mitochondrial peroxiredoxin PRX1
NCU07225	endo-1,4-beta-xylanase 2	NCU04054	tubulin beta chain	NCU02929	hypothetical protein	NCU06043	GPR/FUN34 family protein
NCU07267	bli-3	NCU04070	hypothetical protein	NCU02932	hypothetical protein	NCU06110	thiazole biosynthetic enzyme
NCU07277	anchored cell wall protein 8	NCU04077	assimilatory sulfite reductase	NCU02936	proline oxidase	NCU06123	phosphoketolase
NCU07281	glucose-6-phosphate isomerase	NCU04078	NAD-dependent methanol dehydrogenase	NCU02941	hypothetical protein	NCU06125	hypothetical protein
NCU07282	hypothetical protein	NCU04090	niemann-Pick C1 protein	NCU02948	non-anchored cell wall protein 4	NCU06138	quinate permease
NCU07287	hypothetical protein	NCU04118	aspartokinase	NCU02950	hypothetical protein	NCU06143	hypothetical protein
NCU07296	serine/threonine-protein kinase orb6	NCU04127	hypothetical protein	NCU02954	homoisocitrate dehydrogenase	NCU06153	monooxygenase
NCU07310	hypothetical protein	NCU04130	acylase ACY 1	NCU02959	hypothetical protein	NCU06167	MFS monocarboxylate transporter
NCU07311	hypothetical protein	NCU04133	peptidase family M28	NCU02972	hypothetical protein	NCU06185	ACW-9
NCU07325	conidiation-specific protein con-10	NCU04142	heat shock protein 80	NCU02979	AMP deaminase	NCU06230	serine/threonine protein kinase
NCU07326	hypothetical protein	NCU04145	hypothetical protein	NCU02998	nicotinate-nucleotide pyrophosphorylase	NCU06242	lectin family integral membrane protein
NCU07339	hypothetical protein	NCU04156	C-8 sterol isomerase erg-1	NCU03004	pyruvate dehydrogenase E1 component	NCU06255	hypothetical protein
NCU07340	exoglucanase 1	NCU04158	nitrogen metabolic regulation protein nmr	NCU03006	sterol 24-C-methyltransferase	NCU06261	uracil phosphoribosyltransferase
NCU07363	hypothetical protein	NCU04160	hypothetical protein	NCU03009	zuotin	NCU06265	hypothetical protein
NCU07365	20S proteasome subunit	NCU04164	hypothetical protein	NCU03010	L-aminoadipate-semialdehyde dehydrogenase large subunit	NCU06273	hypothetical protein
NCU07408	60S ribosomal protein P0	NCU04167	hypothetical protein	NCU03013	anchored cell wall protein 10	NCU06277	microtubule associated protein
NCU07420	eIF4A	NCU04168	hypothetical protein	NCU03016	hypothetical protein	NCU06315	inositol hexaphosphate kinase 3
NCU07424	hypothetical protein	NCU04169	hypothetical protein	NCU03024	GARP complex subunit Vps53	NCU06327	benzoate 4-monooxygenase cytochrome P450
NCU07439	hypothetical protein	NCU04170	hypothetical protein	NCU03026	chitinase	NCU06333	translocation protein SEC62
NCU07453	hypothetical protein	NCU04173	actin	NCU03031	succinate dehydrogenase cytochrome b small subunit	NCU06346	hypothetical protein
NCU07487	periplasmic beta-glucosidase	NCU04192	vacuolar aspartyl aminopeptidase Lap4	NCU03038	40S ribosomal protein S13	NCU06361	cwl1
NCU07495	sphingolipid long chain base-responsive protein LSP1	NCU04202	nucleoside diphosphate kinase	NCU03057	hypothetical protein	NCU06364	GDSL lipase/acylhydrolase
NCU07510	hypothetical protein	NCU04216	amidophosphoribosyltransferase	NCU03061	translation initiation factor RLI1	NCU06366	Ca2+/H+ antiporter
NCU07550	triosephosphate isomerase	NCU04230	isocitrate lyase	NCU03064	RSC complex subunit Rsc7	NCU06373	hypothetical protein
NCU07562	60S ribosomal protein L43	NCU04245	outer mitochondrial membrane translocase	NCU03066	GTP-binding protein	NCU06383	UPF0075 domain-containing protein
NCU07697	isocitrate dehydrogenase subunit 2	NCU04249	hypothetical protein	NCU03091	hypothetical protein	NCU06419	MAP kinase kinase
NCU07705	C6 finger domain-containing protein	NCU04255	hypothetical protein	NCU03093	NADH:ubiquinone oxidoreductase 12.3kD subunit	NCU06420	hypothetical protein
NCU07718	hypothetical protein	NCU04266	hypothetical protein	NCU03097	nucleotide-sugar transporter	NCU06448	enoyl-CoA hydratase
NCU07760	endoglucanase IV	NCU04268	hypothetical protein	NCU03098	glycosyl hydrolase	NCU06483	F-box and WD repeat-containing protein
NCU07826	40S ribosomal protein S19	NCU04272	ZZ type zinc finger domain-containing protein	NCU03100	6-phosphogluconate dehydrogenase	NCU06490	hypothetical protein
NCU07830	40S ribosomal protein S14	NCU04274	nuclear envelope protein Cut8	NCU03102	40S ribosomal protein S11	NCU06509	hypothetical protein
NCU07842	woronin sorting complex protein	NCU04280	aconitate hydratase	NCU03107	MFS transporter	NCU06524	protease inhibitor
NCU07857	60S ribosomal protein L34	NCU04287	hypothetical protein	NCU03108	glutamate carboxypeptidase	NCU06542	mitochondrial 30S ribosomal protein S12
NCU07887	ribonucleoside-diphosphate reductase small subunit	NCU04288	Poly（A)+ RNA export protein	NCU03117	inosine-5'-monophosphate dehydrogenase IMD2	NCU06543	acyl-CoA dehydrogenase
NCU07894	oligopeptide transporter 2	NCU04292	branched-chain-amino-acid aminotransferase	NCU03118	hypothetical protein	NCU06555	hypothetical protein
NCU07898	endoglucanase IV	NCU04295	transcription factor	NCU03124	casein kinase II subunit alpha	NCU06556	thioredoxin II
NCU07899	CAIB/BAIF family protein	NCU04303	asparagine synthetase 2	NCU03125	NIMA-interacting protein TinC	NCU06561	rho-gdp dissociation inhibitor
NCU07913	hypothetical protein	NCU04304	outer mitochondrial membrane protein porin	NCU03141	lysophospholipase	NCU06597	hypothetical protein
NCU07922	elongation factor 3	NCU04307	MSF1	NCU03148	nascent polypeptide-associated complex beta subunit	NCU06603	ThiJ/PfpI family protein
NCU07932	hypothetical protein	NCU04314	hypothetical protein	NCU03150	60S ribosomal protein L24	NCU06607	hypothetical protein
NCU07941	aspartate aminotransferase	NCU04331	60s ribosomal protein l5	NCU03156	NUO	NCU06615	hypothetical protein
NCU07947	glycolipid transfer protein HET-C2	NCU04334	chaperonin	NCU03171	small oligopeptide transporter	NCU06616	S-adenosylmethionine-dependent methyltransferase
NCU07966	calcium-transporting ATPase 3	NCU04342	hypothetical protein	NCU03173	HAD superfamily hydrolase	NCU06617	myosin regulatory light chain cdc4
NCU07997	hypothetical protein	NCU04343	DUF323 domain-containing protein	NCU03188	sugar 1,4-lactone oxidase	NCU06619	neutral amino acid permease
NCU08017	hypothetical protein	NCU04346	hypothetical protein	NCU03192	hypothetical protein	NCU06643	oleate-induced peroxisomal protein
NCU08037	hypothetical protein	NCU04385	3-isopropylmalate dehydratase	NCU03197	serine/threonine-protein kinase psk1	NCU06651	AN1-type zinc finger protein
NCU08042	fungal specific transcription factor domain-containing protein	NCU04388	phosphatidylglycerol/phosphatidylinositol transfer protein	NCU03199	ATP synthase subunit H	NCU06658	SET domain-containing protein
NCU08044	oxidoreductase	NCU04400	hypothetical protein	NCU03214	ER lumen protein retaining receptor	NCU06660	plasma membrane proteolipid 3
NCU08055	b-ZIP transcription factor IDI4	NCU04401	fructose-bisphosphate aldolase	NCU03215	glycosyl hydrolase	NCU06666	inositol-3-phosphate synthase
NCU08072	cell wall glucanase	NCU04410	tRNA ligase	NCU03222	hypothetical protein	NCU06682	plasma membrane proteolipid 3
NCU08090	hypothetical protein	NCU04413	UPF0132 domain-containing protein	NCU03233	hypothetical protein	NCU06687	glycogen synthase
NCU08093	hypothetical protein	NCU04415	hypothetical protein	NCU03241	FK506-binding protein 4	NCU06699	cation diffusion facilitator 1
NCU08113	hypothetical protein	NCU04421	annexin XIV	NCU03248	hypothetical protein	NCU06702	yop-1
NCU08114	hexose transporter	NCU04430	leupeptin-inactivating enzyme 1	NCU03255	3-phytase A	NCU06704	hypothetical protein
NCU08117	hypothetical protein	NCU04452	12-oxophytodienoate reductase 1	NCU03263	transmembrane protein	NCU06724	glutamine synthetase
NCU08130	hypothetical protein	NCU04467	hypothetical protein	NCU03270	hypothetical protein	NCU06761	sphingosine-1-phosphate lyase
NCU08131	alpha-amylase	NCU04475	lipase B	NCU03280	NUDIX domain-containing protein	NCU06783	ATP citrate lyase
NCU08137	hypothetical protein	NCU04479	LAP2	NCU03281	TCU-2	NCU06785	ATP-citrate synthase subunit 1
NCU08147	Na or K P-type ATPase	NCU04485	pre-rRNA processing protein Esf1	NCU03293	hypothetical protein	NCU06790	hypothetical protein
NCU08155	hypothetical protein	NCU04502	hypothetical protein	NCU03295	4-coumarate-CoA ligase 1	NCU06803	glutamate decarboxylase
NCU08164	retinol dehydrogenase 13	NCU04508	hypothetical protein	NCU03300	DNA damage checkpoint protein rad24	NCU06815	hypothetical protein
NCU08171	anchored cell wall protein 12	NCU04510	aldose reductase	NCU03302	60S ribosomal protein L36	NCU06863	histone H1
NCU08176	pectate lyase A	NCU04521	hypothetical protein	NCU03313	hypothetical protein	NCU06895	cytochrome P450 4A5
NCU08177	protein kinase	NCU04550	hypothetical protein	NCU03316	pH-response regulator protein palC	NCU06910	hypothetical protein
NCU08189	endo-1,4-beta-xylanase	NCU04552	40S ribosomal protein S26E	NCU03318	hypothetical protein	NCU06923	methionine aminopeptidase 1
NCU08190	hypothetical protein	NCU04553	ubiquitin/ribosomal protein S27a	NCU03321	eukaryotic ribosome biogenesis protein 1	NCU06939	endosome-associated ubiquitin isopeptidase
NCU08229	hypothetical protein	NCU04579	dihydroxy-acid dehydratase	NCU03322	GDSL family lipase	NCU06940	hypothetical protein
NCU08297	cell division control protein 3	NCU04603	hypothetical protein	NCU03323	hypothetical protein	NCU06968	hypothetical protein
NCU08319	developmental regulator flbA	NCU04605	hypothetical protein	NCU03325	triacylglycerol lipase	NCU06971	transcriptional activator xlnR
NCU08330	hypothetical protein	NCU04622	hypothetical protein	NCU03328	endoglucanase II	NCU06977	hypothetical protein
NCU08332	woronin body major protein	NCU04647	actin binding protein	NCU03329	hypothetical protein	NCU06983	hypothetical protein
NCU08336	succinate dehydrogenase flavoprotein subunit	NCU04655	hypothetical protein	NCU03332	3-oxoacyl-(acyl-carrier-protein) reductase	NCU06986	DUF221 domain-containing protein
NCU08344	60s ribosomal protein	NCU04656	MFS transporter	NCU03334	hypothetical protein	NCU07016	hypothetical protein
NCU08351	hypothetical protein	NCU04667	hypothetical protein	NCU03340	cytochrome-c oxidase chain VIIc	NCU07055	monooxygenase
NCU08356	acetamidase	NCU04669	hypothetical protein	NCU03347	kynurenine-oxoglutarate transaminase 1	NCU07063	hypothetical protein
NCU08384	xylose reductase	NCU04720	nitrite reductase	NCU03350	xanthine dehydrogenase	NCU07067	mannosyl-oligosaccharide alpha-1,2-mannosidase
NCU08389	60S ribosomal protein L20	NCU04736	plasma membrane calcium-transporting ATPase 3	NCU03362	steroid alpha reductase	NCU07068	K(+)/H（+) antiporter 1
NCU08397	hypothetical protein	NCU04754	branched-chain-amino-acid aminotransferase	NCU03370	hypothetical protein	NCU07075	calcium/proton exchanger
NCU08398	aldose 1-epimerase	NCU04762	hypothetical protein	NCU03372	nonspecific lipid-transfer protein	NCU07082	aspartyl-tRNA synthetase
NCU08409	tryptophan synthetase	NCU04768	electron transfer flavoprotein-ubiquinone oxidoreductase	NCU03383	hypothetical protein	NCU07121	modin
NCU08411	aspartate aminotransferase	NCU04779	60S ribosomal protein L8	NCU03385	hypothetical protein	NCU07129	amino-acid permease inda1
NCU08412	endo-beta-1,4-mannanase	NCU04790	eukaryotic peptide chain release factor GTP-binding subunit	NCU03388	stomatin family protein	NCU07142	hypothetical protein
NCU08418	tripeptidyl-peptidase	NCU04796	3-ketoacyl-CoA thiolase	NCU03393	ribosome-associated protein	NCU07143	6-phosphogluconolactonase
NCU08425	major facilitator superfamily transporter MFS_1	NCU04797	fructose-1,6-bisphosphatase	NCU03395	vacuolar membrane ATPase 6	NCU07153	glutamate carboxypeptidase
NCU08428	MFS transporter	NCU04799	polyadenylate-binding protein	NCU03396	nucleolar protein nop-58	NCU07158	hypothetical protein
NCU08429	hypothetical protein	NCU04802	peroxisomal biogenesis factor	NCU03398	hypothetical protein	NCU07159	proteinase T
NCU08431	hypothetical protein	NCU04803	2-nitropropane dioxygenase family oxidoreductase	NCU03408	hypothetical protein	NCU07167	isoflavone reductase
NCU08457	rodlet protein	NCU04808	hypothetical protein	NCU03415	aldehyde dehydrogenase	NCU07190	exoglucanase 3
NCU08477	small GTP-binding protein	NCU04837	mitochondrial 2-oxodicarboxylate carrier 1	NCU03439	hypothetical protein	NCU07191	hypothetical protein
NCU08489	transporter SMF1/ESP1	NCU04843	hypothetical protein	NCU03459	UBA domain-containing protein Ucp14	NCU07192	hypothetical protein
NCU08490	hypothetical protein	NCU04847	cyclin	NCU03462	leucine Rich Repeat domain-containing protein	NCU07200	metalloprotease 1
NCU08491	hypothetical protein	NCU04848	hypothetical protein	NCU03493	glycine rich protein	NCU07221	two-component system protein A
NCU08500	40S ribosomal protein S8	NCU04850	exo-beta-1,3-glucanase	NCU03497	plasma membrane iron permease	NCU07224	monooxygenase
NCU08502	40S ribosomal protein S6	NCU04857	2-hydroxyacid dehydrogenase	NCU03503	mannosyltransferase	NCU07225	endo-1,4-beta-xylanase 2
NCU08516	aldose 1-epimerase	NCU04870	acetyl xylan esterase	NCU03506	hypothetical protein	NCU07257	F-box domain-containing protein
NCU08530	hypothetical protein	NCU04885	alpha-xylosidase	NCU03509	amino acid permease NAAP1	NCU07267	bli-3
NCU08541	hypothetical protein	NCU04899	malate dehydrogenase	NCU03515	cell division control protein 10	NCU07273	hypothetical protein
NCU08550	hypothetical protein	NCU04904	hypothetical protein	NCU03518	hypothetical protein	NCU07277	anchored cell wall protein 8
NCU08554	peptidyl-prolyl cis-trans isomerase ssp-1	NCU04907	hypothetical protein	NCU03523	serine/threonine protein kinase	NCU07287	hypothetical protein
NCU08605	proteasome subunit beta type 7	NCU04909	hypothetical protein	NCU03530	anchored cell wall protein 6	NCU07309	guanine deaminase
NCU08620	40S ribosomal protein S16	NCU04910	hypothetical protein	NCU03539	ribonucleoside-diphosphate reductase large subunit	NCU07311	hypothetical protein
NCU08624	hypothetical protein	NCU04914	hypothetical protein	NCU03542	enoyl-CoA hydratase/isomerase	NCU07318	mannitol-1-phosphate 5-dehydrogenase
NCU08627	ribosomal protein CRP7	NCU04930	hypothetical protein	NCU03549	hypothetical protein	NCU07325	conidiation-specific protein con-10
NCU08634	hypothetical protein	NCU04951	hypothetical protein	NCU03556	peroxisomal membrane protein Pmp47	NCU07326	hypothetical protein
NCU08635	hypothetical protein	NCU04963	high-affinity glucose transporter	NCU03558	hypothetical protein	NCU07336	hypothetical protein
NCU08669	betaine aldehyde dehydrogenase 2	NCU05005	HHE domain-containing protein	NCU03559	ubiquinol-cytochrome c reductase complex core protein 2	NCU07339	hypothetical protein
NCU08677	hypothetical protein	NCU05023	hypothetical protein	NCU03561	mitochondrial carrier protein	NCU07340	exoglucanase 1
NCU08687	galactokinase	NCU05032	60S ribosomal protein L40	NCU03565	ribosomal protein L26	NCU07352	hypothetical protein
NCU08715	hypothetical protein	NCU05038	2OG-Fe(II) oxygenase	NCU03569	hypothetical protein	NCU07363	hypothetical protein
NCU08746	starch binding domain-containing protein	NCU05069	FAD dependent oxidoreductase	NCU03575	isoleucyl-tRNA synthetase	NCU07379	bZIP-type transcription factor
NCU08752	acetylcholinesterase	NCU05075	mitochondrial tricarboxylate transporter	NCU03593	homeobox domain-containing protein	NCU07405	hypothetical protein
NCU08755	beta-glucosidase 1	NCU05078	protein-beta-aspartate methyltransferase	NCU03600	GTP-binding protein EsdC	NCU07439	hypothetical protein
NCU08760	endoglucanase II	NCU05079	MFS peptide transporter	NCU03603	cytochrome b5	NCU07453	hypothetical protein
NCU08762	c-14 sterol reductase ERG-3	NCU05095	phenylalanyl-tRNA synthetase subunit alpha	NCU03606	replication factor-A protein 1	NCU07465	mitochondrial phosphate carrier protein 2
NCU08769	conidiation-specific protein 6	NCU05133	udp-glucose 4-epimerase	NCU03608	ketol-acid reductoisomerase	NCU07467	hypothetical protein
NCU08771	acetolactate synthase	NCU05134	hypothetical protein	NCU03621	nuclear migration protein	NCU07487	periplasmic beta-glucosidase
NCU08785	fungal cellulose binding domain-containing protein	NCU05137	non-anchored cell wall protein 1	NCU03635	60S ribosomal protein L38	NCU07491	hypothetical protein
NCU08790	hypothetical protein	NCU05156	hypothetical protein	NCU03636	hypothetical protein	NCU07506	fumarylacetoacetate hydrolase
NCU08791	catalase-1	NCU05159	acetylxylan esterase	NCU03639	lipase	NCU07510	hypothetical protein
NCU08820	hypothetical protein	NCU05168	arginine transporter	NCU03643	cutinase transcription factor 1 beta	NCU07539	hypothetical protein
NCU08823	Ras-like protein	NCU05170	hypothetical protein	NCU03648	glutaminase A	NCU07569	hypothetical protein
NCU08847	hypothetical protein	NCU05226	ABC transporter	NCU03651	NADP-dependent malic enzyme	NCU07572	hypothetical protein
NCU08870	hypothetical protein	NCU05233	p60 domain-containing protein	NCU03661	GTPase-activating protein GYP7	NCU07585	siroheme synthase
NCU08909	beta-1,3-glucanosyltransferase	NCU05235	ribosome biogenesis protein RLP24	NCU03678	ssh-4	NCU07675	hypothetical protein
NCU08924	acyl-CoA dehydrogenase	NCU05238	sulfite reductase beta subunit	NCU03679	hypothetical protein	NCU07705	C6 finger domain-containing protein
NCU08936	clock-controlled gene-15	NCU05259	acyl-CoA desaturase 1	NCU03684	hypothetical protein	NCU07718	hypothetical protein
NCU08949	hypothetical protein	NCU05269	heat shock protein 88	NCU03686	oxidase assembly protein 2	NCU07723	norsolorinic acid reductase
NCU08960	hypothetical protein	NCU05274	initiation factor 5a	NCU03702	rRNA 2'-O-methyltransferase fibrillarin	NCU07737	salicylate hydroxylase
NCU08963	60S ribosomal protein L30	NCU05275	ubiquitin fusion protein	NCU03703	60S ribosomal protein L17	NCU07745	hypothetical protein
NCU08964	60S ribosomal protein L10	NCU05278	cytochrome P450 61	NCU03711	GTP-binding protein ypt7	NCU07746	F-box domain-containing protein
NCU08973	SNARE protein Ykt6	NCU05279	hypothetical protein	NCU03713	guanosine-diphosphatase	NCU07760	endoglucanase IV
NCU08990	60S ribosomal protein L39	NCU05285	C2H2 transcription factor RfeC	NCU03725	VIB-1	NCU07769	hypothetical protein
NCU09002	NADH:ubiquinone oxidoreductase 10.6kD subunit	NCU05288	rab GDP-dissociation inhibitor	NCU03728	hypothetical protein	NCU07776	anchored cell wall protein 5
NCU09010	hypothetical protein	NCU05289	nucleolar GTP-binding protein 1	NCU03730	tRNA '-O-ribosylphosphate transferase	NCU07787	clock controlled protein CCG-14
NCU09041	L-xylulose reductase	NCU05290	orotate phosphoribosyltransferase	NCU03735	hypothetical protein	NCU07788	fungal specific transcription factor
NCU09057	hypothetical protein	NCU05298	nitrate reductase	NCU03736	hypothetical protein	NCU07802	hypothetical protein
NCU09076	ATP-dependent RNA helicase	NCU05301	methyltransferase	NCU03737	elongation factor Tu	NCU07804	hypothetical protein
NCU09109	60S ribosomal protein L33	NCU05304	nuclear segregation protein	NCU03738	40S ribosomal protein S29	NCU07807	fructose-bisphosphate aldolase
NCU09119	ATP synthase subunit gamma	NCU05381	hypothetical protein	NCU03748	saccharopine dehydrogenase	NCU07817	non-anchored cell wall protein 3
NCU09160	HPP family protein	NCU05386	hypothetical protein	NCU03753	clock controlled protein CCG-1	NCU07853	uricase
NCU09175	GPI-anchored cell wall beta-1,3-endoglucanase EglC	NCU05387	hydrolase	NCU03757	60S ribosomal protein L4-A	NCU07856	hypothetical protein
NCU09176	hypothetical protein	NCU05390	mitochondrial phosphate carrier protein	NCU03761	hypothetical protein	NCU07887	ribonucleoside-diphosphate reductase small subunit
NCU09183	kynureninase	NCU05395	hypothetical protein	NCU03766	small nuclear ribonucleoprotein	NCU07894	oligopeptide transporter 2
NCU09184	indoleamine 2,3-dioxygenase	NCU05404	endoglucanase	NCU03770	cell wall glycosyl hydrolase Dfg5	NCU07898	endoglucanase IV
NCU09212	serine/threonine-protein kinase	NCU05410	acetylornithine aminotransferase	NCU03776	ABC multidrug transporter	NCU07899	CAIB/BAIF family protein
NCU09223	protein disulfide-isomerase	NCU05419	hydroxymethylglutaryl-CoA lyase	NCU03779	dihydroxyacetone kinase 1	NCU07952	C2H2 type zinc finger domain-containing protein
NCU09235	conidiation-specific protein-8	NCU05420	chorismate synthase	NCU03793	hypothetical protein	NCU07953	alternative oxidase
NCU09259	hypothetical protein	NCU05425	2-oxoglutarate dehydrogenase E1 component	NCU03795	cell division control protein 12	NCU08042	fungal specific transcription factor domain-containing protein
NCU09266	methylmalonate-semialdehyde dehydrogenase	NCU05430	ATP synthase beta subunit	NCU03806	ribosomal protein L27a.e	NCU08090	hypothetical protein
NCU09267	copper radical oxidase	NCU05457	cytochrome c oxidase subunit IV	NCU03813	formate dehydrogenase	NCU08092	nipsnap family protein
NCU09271	hypothetical protein	NCU05488	RNA-binding protein Vip1	NCU03826	elongation factor 1-gamma	NCU08113	hypothetical protein
NCU09283	acetyltransferase	NCU05490	hypothetical protein	NCU03848	hypothetical protein	NCU08114	hexose transporter
NCU09285	zinc-containing alcohol dehydrogenase	NCU05495	CVNH domain-containing protein	NCU03857	hypothetical protein	NCU08115	DNA mismatch repair protein Msh3
NCU09287	sugar transporter	NCU05498	hypothetical protein	NCU03860	cAMP-regulated phosphoprotein family protein Igo1	NCU08117	hypothetical protein
NCU09295	hypothetical protein	NCU05499	homogentisate 1,2-dioxygenase	NCU03873	hypothetical protein	NCU08130	hypothetical protein
NCU09326	hypothetical protein	NCU05512	copper resistance protein Crd2	NCU03876	eukaryotic translation initiation factor 3 subunit 2	NCU08131	alpha-amylase
NCU09333	zinc finger transcription factor ace1	NCU05524	hypothetical protein	NCU03897	RNA binding effector protein Scp160	NCU08137	hypothetical protein
NCU09403	NmrA family protein	NCU05526	homocitrate synthase	NCU03898	ESCRT-II complex component	NCU08148	H+/nucleoside cotransporter
NCU09416	cellulose-binding GDSL lipase/acylhydrolase	NCU05537	fumarylacetoacetase	NCU03904	hypothetical protein	NCU08152	high affinity glucose transporter
NCU09422	hypothetical protein	NCU05548	phospho-2-dehydro-3-deoxyheptonate aldolase	NCU03910	microsomal cytochrome b5	NCU08155	hypothetical protein
NCU09425	NdvB protein	NCU05554	60S ribosomal protein L13	NCU03913	2-oxoisovalerate dehydrogenase beta subunit	NCU08164	retinol dehydrogenase 13
NCU09427	G-protein coupled receptor	NCU05561	copper metallothionein	NCU03922	hydroxymethylglutaryl-CoA synthase	NCU08171	anchored cell wall protein 12
NCU09428	hypothetical protein	NCU05564	peroxisomal membrane protein PEX31	NCU03928	hypothetical protein	NCU08176	pectate lyase A
NCU09429	flavin-containing monooxygenase	NCU05575	hypothetical protein	NCU03929	acyl-CoA synthetase	NCU08177	protein kinase
NCU09436	histone chaperone asf-1	NCU05585	MFS quinate transporter	NCU03949	FMN-dependent 2-nitropropane dioxygenase	NCU08189	endo-1,4-beta-xylanase
NCU09460	NADH:ubiquinone oxidoreductase 20.1kD subunit	NCU05599	40S ribosomal protein S28	NCU03963	5'-methylthioadenosine phosphorylase	NCU08190	hypothetical protein
NCU09475	40s ribosomal protein s5	NCU05650	karyopherin Kap123	NCU03967	vivid PAS protein VVD	NCU08224	hypothetical protein
NCU09476	40S ribosomal protein S25	NCU05680	alpha-1,2-mannosyltransferase Kre5	NCU03988	60S ribosomal protein L18	NCU08229	hypothetical protein
NCU09491	feruloyl esterase B	NCU05686	cell wall glucanase	NCU03990	hypothetical protein	NCU08272	cytochrome b2
NCU09498	hypothetical protein	NCU05691	hypothetical protein	NCU03995	oligosaccharyl transferase subunit	NCU08280	squalene epoxidase
NCU09505	hypothetical protein	NCU05720	chitin synthase export chaperone	NCU04019	nicotinamide mononucleotide adenylyl transferase	NCU08330	hypothetical protein
NCU09522	hypothetical protein	NCU05751	cellulose-binding protein	NCU04020	lysyl-tRNA synthetase	NCU08333	bleomycin hydrolase
NCU09523	hypothetical protein	NCU05752	indoleamine 2,3-dioxygenase	NCU04034	hypothetical protein	NCU08336	succinate dehydrogenase flavoprotein subunit
NCU09524	hypothetical protein	NCU05770	peroxidase/catalase 2	NCU04036	hypothetical protein	NCU08340	ADP-ribosylation factor 1
NCU09532	L-threo-3-deoxy-hexulosonate aldolase	NCU05782	ATP-dependent RNA helicase dbp-3	NCU04045	hypothetical protein	NCU08351	hypothetical protein
NCU09533	NAD binding Rossmann fold oxidoreductase	NCU05789	secreted glucosidase	NCU04047	hypothetical protein	NCU08363	MPU1p
NCU09553	3-hydroxybutyryl CoA dehydrogenase	NCU05804	60S ribosomal protein L19	NCU04050	cross-pathway control protein 1	NCU08364	choline sulfatase
NCU09560	superoxide dismutase	NCU05810	guanine nucleotide-binding protein subunit beta-like protein	NCU04054	tubulin beta chain	NCU08371	hypothetical protein
NCU09581	hypothetical protein	NCU05826	hypothetical protein	NCU04070	hypothetical protein	NCU08379	hypothetical protein
NCU09582	chitin deacetylase	NCU05832	hypothetical protein	NCU04077	assimilatory sulfite reductase	NCU08384	xylose reductase
NCU09646	3-ketoacyl-CoA thiolase	NCU05835	hypothetical protein	NCU04087	Aha1 domain-containing protein	NCU08398	aldose 1-epimerase
NCU09652	beta-xylosidase	NCU05836	glycosyl hydrolase family 47 protein	NCU04090	niemann-Pick C1 protein	NCU08409	tryptophan synthetase
NCU09659	5'-nucleotidase	NCU05838	hypothetical protein	NCU04092	N-acylethanolamine amidohydrolase	NCU08411	aspartate aminotransferase
NCU09664	acetylxylan esterase	NCU05850	rubredoxin-NAD（+) reductase	NCU04096	serine/threonine-protein kinase 3	NCU08412	endo-beta-1,4-mannanase
NCU09680	exoglucanase 2	NCU05853	MFS sugar transporter	NCU04099	alpha-methylacyl-CoA racemase	NCU08418	tripeptidyl-peptidase
NCU09681	hypothetical protein	NCU05869	hypothetical protein	NCU04104	chromosome segregation protein Cse1	NCU08428	MFS transporter
NCU09689	hypothetical protein	NCU05878	hypothetical protein	NCU04114	hypothetical protein	NCU08429	hypothetical protein
NCU09693	hypothetical protein	NCU05881	DUF500 and UBA/TS-N domain-containing protein	NCU04118	aspartokinase	NCU08434	5-methyltetrahydropteroyltriglutamate-homocysteine methyltransferase
NCU09705	GAL10	NCU05889	eukaryotic translation initiation factor 3 subunit 6	NCU04127	hypothetical protein	NCU08445	misfolded glycoproteins degradation protein Yos9
NCU09764	hypothetical protein	NCU05899	flotillin domain-containing protein	NCU04130	acylase ACY 1	NCU08455	hypothetical protein
NCU09777	UPF0075 domain-containing protein	NCU05956	beta-galactosidase	NCU04133	peptidase family M28	NCU08457	rodlet protein
NCU09778	cell division control protein 2	NCU05965	arabinosidase	NCU04142	heat shock protein 80	NCU08491	hypothetical protein
NCU09785	hypothetical protein	NCU05974	cell wall glucanosyltransferase Mwg1	NCU04156	C-8 sterol isomerase erg-1	NCU08530	hypothetical protein
NCU09786	hypothetical protein	NCU05977	dihydrodipicolinate synthase	NCU04164	hypothetical protein	NCU08541	hypothetical protein
NCU09791	beta-1,3-exoglucanase	NCU05980	carboxypeptidase S1	NCU04167	hypothetical protein	NCU08549	UDP-galactose 4-epimerase
NCU09816	cytochrome c1	NCU05989	hypothetical protein	NCU04169	hypothetical protein	NCU08553	DNA directed RNA polymerase II 15 kDa subunit
NCU09823	hypothetical protein	NCU05990	cell surface receptor/MFS transporter	NCU04170	hypothetical protein	NCU08554	peptidyl-prolyl cis-trans isomerase ssp-1
NCU09864	2-oxoisovalerate dehydrogenase alpha subunit	NCU05994	transcription factor TamA	NCU04173	actin	NCU08620	40S ribosomal protein S16
NCU09873	phosphoenolpyruvate carboxykinase	NCU06003	mannose-1-phosphate guanyltransferase	NCU04188	UPF0220 domain-containing protein	NCU08621	hypothetical protein
NCU09874	hypothetical protein	NCU06005	glycerol kinase	NCU04192	vacuolar aspartyl aminopeptidase Lap4	NCU08624	hypothetical protein
NCU09883	hypothetical protein	NCU06006	hypothetical protein	NCU04194	hypothetical protein	NCU08626	deoxyribodipyrimidine photolyase
NCU09886	hypothetical protein	NCU06009	oxidoreductase	NCU04197	CipC protein	NCU08674	pentatricopeptide repeat protein
NCU09906	hypothetical protein	NCU06020	chitinase	NCU04202	nucleoside diphosphate kinase	NCU08677	hypothetical protein
NCU09923	beta-xylosidase	NCU06031	mitochondrial peroxiredoxin PRX1	NCU04213	progesterone binding protein	NCU08687	galactokinase
NCU09924	BNR/Asp-box repeat protein	NCU06035	elongation factor 1-beta	NCU04216	amidophosphoribosyltransferase	NCU08707	iron sulfur assembly protein
NCU09968	hypothetical protein	NCU06043	GPR/FUN34 family protein	NCU04230	isocitrate lyase	NCU08713	hypothetical protein
NCU10007	malate synthase	NCU06047	40S ribosomal protein S2	NCU04231	hypothetical protein	NCU08746	starch binding domain-containing protein
NCU10014	hypothetical protein	NCU06054	squalene synthetase	NCU04245	outer mitochondrial membrane translocase	NCU08750	isoamyl alcohol oxidase
NCU10021	MFS monosaccharide transporter	NCU06075	pyruvate kinase	NCU04249	hypothetical protein	NCU08752	acetylcholinesterase
NCU10039	hypothetical protein	NCU06095	CP2 transcription factor	NCU04255	hypothetical protein	NCU08755	beta-glucosidase 1
NCU10040	hypothetical protein	NCU06099	hypothetical protein	NCU04266	hypothetical protein	NCU08756	hypothetical protein
NCU10045	pectinesterase	NCU06110	thiazole biosynthetic enzyme	NCU04268	hypothetical protein	NCU08760	endoglucanase II
NCU10061	proteasome subunit alpha type 6	NCU06142	hypothetical protein	NCU04272	ZZ type zinc finger domain-containing protein	NCU08769	conidiation-specific protein 6
NCU10063	sugar isomerase	NCU06143	hypothetical protein	NCU04274	nuclear envelope protein Cut8	NCU08770	hypothetical protein
NCU10106	mitochondrial triosephosphate isomerase	NCU06153	monooxygenase	NCU04276	hypothetical protein	NCU08771	acetolactate synthase
NCU10107	ribose 5-phosphate isomerase	NCU06156	hypothetical protein	NCU04280	aconitate hydratase	NCU08772	cyclin-dependent protein kinase complex component
NCU10110	3-hydroxyisobutyrate dehydrogenase	NCU06185	ACW-9	NCU04281	WD-repeat protein pop3	NCU08785	fungal cellulose binding domain-containing protein
NCU10276	hypothetical protein	NCU06187	adenylosuccinate lyase	NCU04282	hypothetical protein	NCU08790	hypothetical protein
NCU10359	neutral ceramidase	NCU06189	5-aminolevulinate synthase	NCU04283	hypothetical protein	NCU08791	catalase-1
NCU10498	60S ribosomal protein L35	NCU06207	C-5 sterol desaturase	NCU04284	hypothetical protein	NCU08807	DNA-binding protein cre-1
NCU10507	hypothetical protein	NCU06210	hypothetical protein	NCU04287	hypothetical protein	NCU08811	arf GTPase-activating protein
NCU10521	hypothetical protein	NCU06211	malate dehydrogenase	NCU04288	Poly（A)+ RNA export protein	NCU08828	peroxisomal hydratase-dehydrogenase-epimerase
NCU10546	4-coumarate-CoA ligase	NCU06217	nucleolar protein 4	NCU04298	pentafunctional AROM polypeptide	NCU08847	hypothetical protein
NCU10603	hypothetical protein	NCU06226	60S ribosomal protein L25	NCU04303	asparagine synthetase 2	NCU08856	myo-inositol oxygenase
NCU10732	mitochondrial dicarboxylate transporter	NCU06230	serine/threonine protein kinase	NCU04304	outer mitochondrial membrane protein porin	NCU08867	hypothetical protein
NCU10763	small oligopeptide transporter	NCU06232	3-isopropylmalate dehydrogenase	NCU04307	MSF1	NCU08877	glycine cleavage system H protein
NCU10777	GMF family protein	NCU06255	hypothetical protein	NCU04331	60s ribosomal protein l5	NCU08897	protein transporter SEC61 subunit alpha
NCU11181	Ras superfamily GTPase	NCU06261	uracil phosphoribosyltransferase	NCU04337	survival factor 1	NCU08907	BYS1 domain-containing protein
NCU11259	hypothetical protein	NCU06265	hypothetical protein	NCU04339	ribokinase	NCU08909	beta-1,3-glucanosyltransferase
NCU11260	hypothetical protein	NCU06271	hypothetical protein	NCU04340	acetyltransferase	NCU08924	acyl-CoA dehydrogenase
NCU11278	hypothetical protein	NCU06277	microtubule associated protein	NCU04343	DUF323 domain-containing protein	NCU08936	clock-controlled gene-15
NCU11337	hypothetical protein	NCU06279	eukaryotic translation initiation factor 3	NCU04368	glutathione S-transferase Gst3	NCU08947	ubiquinol-cytochrome-c reductase chain VIII
NCU11338	hypothetical protein	NCU06301	hypothetical protein	NCU04371	peptidyl-prolyl cis-trans isomerase fkr-3	NCU08949	hypothetical protein
NCU11353	D-xylulose kinase	NCU06317	stress response RCI peptide	NCU04373	hypothetical protein	NCU08954	hypothetical protein
NCU11395	S-(hydroxymethyl)glutathione dehydrogenase	NCU06324	hypothetical protein	NCU04380	acyl-CoA synthetase	NCU08957	hypothetical protein
NCU11414	plasma membrane zinc ion transporter	NCU06326	pectate lyase 1	NCU04385	3-isopropylmalate dehydratase	NCU08974	hypothetical protein
NCU16374	hypothetical protein	NCU06327	benzoate 4-monooxygenase cytochrome P450	NCU04388	phosphatidylglycerol/phosphatidylinositol transfer protein	NCU08986	hypothetical protein
NCU16405	hypothetical protein	NCU06346	hypothetical protein	NCU04400	hypothetical protein	NCU08988	hypothetical protein
NCU16528	hypothetical protein	NCU06351	phytase	NCU04401	fructose-bisphosphate aldolase	NCU08991	hypothetical protein
NCU16529	hypothetical protein	NCU06358	high affinity glucose transporter RGT2	NCU04404	coatomer beta subunit	NCU09041	L-xylulose reductase
NCU16555	hypothetical protein	NCU06361	cwl1	NCU04410	tRNA ligase	NCU09043	caleosin domain-containing protein
NCU16627	hypothetical protein	NCU06364	GDSL lipase/acylhydrolase	NCU04415	hypothetical protein	NCU09057	hypothetical protein
NCU16635	hypothetical protein	NCU06373	hypothetical protein	NCU04430	leupeptin-inactivating enzyme 1	NCU09079	meiotically up-regulated 72 protein
NCU16683	hypothetical protein	NCU06380	zinc transporter YKE4	NCU04442	GAL10	NCU09101	hypothetical protein
NCU16725	potassium ion channel Yvc1	NCU06402	C-4 methylsterol oxidase	NCU04456	hypothetical protein	NCU09108	hypothetical protein
NCU16741	hypothetical protein	NCU06410	GTP-binding protein YPT52	NCU04460	galactose-1-phosphate uridylyltransferase	NCU09116	aromatic aminotransferase Aro8
NCU16742	hypothetical protein	NCU06414	hypothetical protein	NCU04466	cyanamide hydratase	NCU09133	ACW-7
NCU16776	hypothetical protein	NCU06425	hypothetical protein	NCU04468	proline-specific permease	NCU09152	hypothetical protein
NCU16817	hypothetical protein	NCU06431	40S ribosomal protein S22	NCU04474	sulfite oxidase	NCU09160	HPP family protein
NCU16822	hypothetical protein	NCU06432	40S ribosomal protein S12	NCU04475	lipase B	NCU09174	hypothetical protein
NCU16856	hypothetical protein	NCU06441	D-lactate dehydrogenase 2	NCU04479	LAP2	NCU09175	GPI-anchored cell wall beta-1,3-endoglucanase EglC
NCU17116	hypothetical protein	NCU06448	enoyl-CoA hydratase	NCU04486	hypothetical protein	NCU09176	hypothetical protein
		NCU06452	cysteine synthase	NCU04487	hypothetical protein	NCU09183	kynureninase
		NCU06464	hypothetical protein	NCU04491	hypothetical protein	NCU09184	indoleamine 2,3-dioxygenase
		NCU06469	54S ribosomal protein L12	NCU04501	hypothetical protein	NCU09209	galactose oxidase
		NCU06482	pyruvate dehydrogenase E1 component alpha subunit	NCU04502	hypothetical protein	NCU09210	dyp-type peroxidase
		NCU06485	hypothetical protein	NCU04510	aldose reductase	NCU09223	protein disulfide-isomerase
		NCU06490	hypothetical protein	NCU04519	microsomal signal peptidase 18 kDa subunit	NCU09230	cystathionine gamma-lyase
		NCU06509	hypothetical protein	NCU04533	DUF1881 domain-containing protein	NCU09231	DUF1275 domain-containing protein
		NCU06512	methionine synthase	NCU04543	hypothetical protein	NCU09235	conidiation-specific protein-8
		NCU06522	MFS maltose permease	NCU04552	40S ribosomal protein S26E	NCU09243	hypothetical protein
		NCU06523	alpha-glucosidase	NCU04553	ubiquitin/ribosomal protein S27a	NCU09263	hypothetical protein
		NCU06524	protease inhibitor	NCU04579	dihydroxy-acid dehydratase	NCU09264	APAF1-interacting protein
		NCU06526	hypothetical protein	NCU04591	pentachlorophenol monooxygenase	NCU09265	calreticulin
		NCU06530	palmitoyl-protein thioesterase	NCU04603	hypothetical protein	NCU09266	methylmalonate-semialdehyde dehydrogenase
		NCU06536	hypothetical protein	NCU04605	hypothetical protein	NCU09281	alpha-glucosidase
		NCU06543	acyl-CoA dehydrogenase	NCU04610	oxysterol binding protein	NCU09283	acetyltransferase
		NCU06549	pyridoxine 2	NCU04622	hypothetical protein	NCU09285	zinc-containing alcohol dehydrogenase
		NCU06550	pyridoxine 1	NCU04633	RING finger protein	NCU09287	sugar transporter
		NCU06555	hypothetical protein	NCU04635	hypothetical protein	NCU09295	hypothetical protein
		NCU06560	hypothetical protein	NCU04642	adenosine deaminase	NCU09326	hypothetical protein
		NCU06561	rho-gdp dissociation inhibitor	NCU04655	hypothetical protein	NCU09333	zinc finger transcription factor ace1
		NCU06597	hypothetical protein	NCU04656	MFS transporter	NCU09345	thiamine biosynthesis protein NMT-1
		NCU06606	ubiquinol-cytochrome c reductase iron-sulfur subunit	NCU04667	hypothetical protein	NCU09347	fructose-2,6-bisphosphatase
		NCU06610	PQ loop repeat protein	NCU04669	hypothetical protein	NCU09355	hypothetical protein
		NCU06615	hypothetical protein	NCU04671	hypothetical protein	NCU09371	6,7-dimethyl-8-ribityllumazine synthase
		NCU06616	S-adenosylmethionine-dependent methyltransferase	NCU04674	alpha-glucosidase	NCU09407	patatin family phospholipase
		NCU06619	neutral amino acid permease	NCU04675	hypothetical protein	NCU09416	cellulose-binding GDSL lipase/acylhydrolase
		NCU06632	outer mitochondrial membrane translocase 20	NCU04720	nitrite reductase	NCU09425	NdvB protein
		NCU06643	oleate-induced peroxisomal protein	NCU04732	hypothetical protein	NCU09477	ADP/ATP carrier protein
		NCU06646	RNA polymerase II transcription factor B subunit 5	NCU04753	NADH:ubiquinone oxidoreductase 11.6kD subunit	NCU09480	heme/steroid binding domain-containing protein
		NCU06652	S-(hydroxymethyl)glutathione dehydrogenase	NCU04754	branched-chain-amino-acid aminotransferase	NCU09485	chaperone dnaK
		NCU06656	transcriptional activator protein acu-15	NCU04757	hypothetical protein	NCU09491	feruloyl esterase B
		NCU06660	plasma membrane proteolipid 3	NCU04759	nuclear transport factor 2	NCU09498	hypothetical protein
		NCU06661	60S ribosomal protein L22	NCU04762	hypothetical protein	NCU09505	hypothetical protein
		NCU06666	inositol-3-phosphate synthase	NCU04768	electron transfer flavoprotein-ubiquinone oxidoreductase	NCU09524	hypothetical protein
		NCU06679	histone acetyltransferase type B subunit 2	NCU04771	fructosyl-amino acid oxidase	NCU09529	hypothetical protein
		NCU06682	plasma membrane proteolipid 3	NCU04779	60S ribosomal protein L8	NCU09553	3-hydroxybutyryl CoA dehydrogenase
		NCU06694	fatty acid elongase	NCU04781	NADH:ubiquinone oxidoreductase 9.8	NCU09560	superoxide dismutase
		NCU06695	cytochrome c oxidase polypeptide VI	NCU04796	3-ketoacyl-CoA thiolase	NCU09575	sterol esterase
		NCU06702	yop-1	NCU04797	fructose-1,6-bisphosphatase	NCU09581	hypothetical protein
		NCU06724	glutamine synthetase	NCU04799	polyadenylate-binding protein	NCU09582	chitin deacetylase
		NCU06727	spermidine synthase	NCU04802	peroxisomal biogenesis factor	NCU09646	3-ketoacyl-CoA thiolase
		NCU06741	cytochrome c oxidase subunit VIb	NCU04803	2-nitropropane dioxygenase family oxidoreductase	NCU09652	beta-xylosidase
		NCU06743	hypothetical protein	NCU04805	hypothetical protein	NCU09659	5'-nucleotidase
		NCU06761	sphingosine-1-phosphate lyase	NCU04808	hypothetical protein	NCU09663	Axe2
		NCU06764	20S proteasome subunit Y7	NCU04815	lactoylglutathione lyase	NCU09664	acetylxylan esterase
		NCU06783	ATP citrate lyase	NCU04826	hypothetical protein	NCU09680	exoglucanase 2
		NCU06785	ATP-citrate synthase subunit 1	NCU04837	mitochondrial 2-oxodicarboxylate carrier 1	NCU09681	hypothetical protein
		NCU06803	glutamate decarboxylase	NCU04843	hypothetical protein	NCU09689	hypothetical protein
		NCU06809	hormone-sensitive lipase	NCU04845	phytanoyl-CoA dioxygenase	NCU09698	hypothetical protein
		NCU06815	hypothetical protein	NCU04850	exo-beta-1,3-glucanase	NCU09705	GAL10
		NCU06843	60S ribosomal protein L3	NCU04856	glutamine synthetase	NCU09732	acetyl-CoA acetyltransferase
[truncated: 840 more rows]
